# Supplementary material for: Worldwide trends in diabetes prevalence and treatment from 1990 to 2022: a pooled analysis of 1108 population-representative studies with 141 million participants
Source: PubMed Central journal article supplement (PMC7616842; doi:10.1016/s0140-6736(24)02317-1), 2024-11
Supplement: EMS200082-supplement-Appendix.pdf [file EMS200082-supplement-Appendix.pdf]

# THE LANCET

## Supplementary appendix

This appendix formed part of the original submission and has been peer reviewed. We post it as supplied by the authors.

Supplement to: NCD Risk Factor Collaboration (NCD-RisC). Worldwide trends in diabetes prevalence and treatment from 1990 to 2022: a pooled analysis of 1108 population-representative studies with 141 million participants. *Lancet* 2024; published online Nov 13. [https://doi.org/10.1016/S0140-6736\(24\)02317-1](https://doi.org/10.1016/S0140-6736(24)02317-1).

## Table of Contents

|                                                                                                                                                                                                                                                               |    |
|---------------------------------------------------------------------------------------------------------------------------------------------------------------------------------------------------------------------------------------------------------------|----|
| Appendix Text 1. NCD Risk Factor Collaboration (NCD-RisC).....                                                                                                                                                                                                | 2  |
| Appendix Text 2. Data sources.....                                                                                                                                                                                                                            | 27 |
| Appendix Text 3. Statistical methods.....                                                                                                                                                                                                                     | 33 |
| Appendix Text 4. Decomposition of change in the number of people with untreated diabetes.<br>.....                                                                                                                                                            | 48 |
| Appendix Table 1. Data sources used in the analysis. ....                                                                                                                                                                                                     | 49 |
| Appendix Table 2. List of analysis regions and super-regions, and countries in each region.<br>.....                                                                                                                                                          | 69 |
| Appendix Table 3. Global age-standardised diabetes prevalence and number of people with<br>diabetes in 1990 and 2022 for women and men aged 18+ years and 30+ years. ....                                                                                     | 70 |
| Appendix Table 4. Comparison of age-standardised diabetes prevalence estimates in this<br>work with recent global studies. ....                                                                                                                               | 71 |
| Appendix Table 5. Comparison of data sources and estimates of diabetes prevalence in this<br>work with recent global studies, for the 30 countries with the largest adult population in 2022.<br>.....                                                        | 72 |
| Appendix Figure 1. Number of data sources used in this analysis, by country.....                                                                                                                                                                              | 74 |
| Appendix Figure 2. Number of data sources used in this paper, by region and year. ....                                                                                                                                                                        | 76 |
| Appendix Figure 3. Posterior probability that age-standardised diabetes prevalence for people<br>aged 18+ years increased from 1990 to 2022. ....                                                                                                             | 78 |
| Appendix Figure 4. Posterior probability that age-standardised diabetes treatment coverage<br>for people aged 30+ years increased from 1990 to 2022. ....                                                                                                     | 80 |
| Appendix Figure 5. Relationship between levels in 1990 and 2022 for age-standardised<br>diabetes prevalence for people aged 18+ years and age-standardised treatment coverage for<br>people aged 30+ years. ....                                              | 82 |
| Appendix Figure 6. Relationship of age-standardised diabetes prevalence and treatment<br>coverage between women and men in 2022. ....                                                                                                                         | 84 |
| Appendix Figure 7. Relationship between age-standardised and crude prevalence of diabetes<br>among women and men aged 18+ years in 2022.....                                                                                                                  | 86 |
| Appendix Figure 8. Median age of women and men with diabetes in 2022 by country. ....                                                                                                                                                                         | 88 |
| Appendix Figure 9. Age-standardised diabetes prevalence for people aged 18+ years from<br>1990 to 2022 by country, for both sexes combined. ....                                                                                                              | 90 |
| Appendix Figure 10. Levels in 2022 and change from 1990 to 2022 by country of (A) age-<br>standardised diabetes prevalence for people aged 18+ years, and (B) age-standardised<br>treatment coverage for people aged 30+ years, for both sexes combined. .... | 92 |
| Appendix Figure 11. Age-standardised treatment coverage for people aged 30+ years in 1990<br>and 2022, for both sexes combined.....                                                                                                                           | 94 |
| References.....                                                                                                                                                                                                                                               | 96 |

## **Appendix Text 1. NCD Risk Factor Collaboration (NCD-RisC)**

### Pooled Analysis and Writing (\* equal contribution; joint first authors)

Bin Zhou (PhD; Imperial College London, UK)\*; Archie W Rayner (MSci; Imperial College London, UK)\*; Prof Edward W Gregg (PhD; RCSI University of Medicine and Health Sciences, Ireland; Imperial College London, UK); Kate E Sheffer (MSc; Imperial College London, UK); Rodrigo M Carrillo-Larco (MD; Emory University, USA); James E Bennett (PhD; Imperial College London, UK); Prof Jonathan E Shaw (MD; Baker Heart and Diabetes Institute, Australia); Prof Christopher J Paciorek (PhD; University of California, Berkeley, USA); Rosie K Singleton (MSc; Imperial College London, UK); Ana Barradas Pires (MD; Imperial College London, UK); Gretchen A Stevens (ScD; World Health Organization, Switzerland); Prof Goodarz Danaei (ScD; Harvard TH Chan School of Public Health, USA); Victor PF Lhoste (MSc; Imperial College London, UK); Nowell H Phelps (MMath; Johns Hopkins Bloomberg School of Public Health, USA); Rachel A Heap (MPH; Imperial College London, UK); Lakshya Jain (MSc; Imperial College London, UK); Ysé d'Ailhaud de Brisis (MSc; Imperial College London, UK); Agnese Galeazzi (MSci; Imperial College London, UK); Prof Andre P Kengne (PhD; South African Medical Research Council, South Africa); Anu Mishra (PhD; Bill & Melinda Gates Foundation, USA); Nayu Ikeda (PhD; National Institutes of Biomedical Innovation, Health and Nutrition, Japan); Prof Hsien-Ho Lin (MD; National Taiwan University, Taiwan); Prof Carlos A Aguilar-Salinas (DSc; Instituto Nacional de Ciencias Médicas y Nutrición, Mexico); Ranjit Mohan Anjana (PhD; Madras Diabetes Research Foundation, India); Prof Habiba Ben Romdhane (MD; University Tunis El Manar, Tunisia); Prof Kairat Davletov (PhD; Asfendiyarov Kazakh National Medical University, Kazakhstan); Shubash Ganapathy (MPH; Ministry of Health, Malaysia); Christin Heidemann (DrPH; Robert Koch Institute, Germany); Prof Yousef Saleh Khader (ScD; Jordan University of Science and Technology, Jordan); Prof Young-Ho Khang (MD; Seoul National University College of Medicine, Republic of Korea); Prof Avula Laxmaiah (PhD; ICMR - National Institute of Nutrition, India); Prof Jean Claude N Mbanya (PhD; University of Yaoundé 1, Cameroon); Viswanathan Mohan (MD; Madras Diabetes Research Foundation, India); Prof KM Venkat Narayan (MD; Emory University, USA);

Meda E Pavkov (PhD; Centres for Disease Control and Prevention, USA); Prof Eugène Sobngwi (MD; University of Yaoundé 1, Cameroon); Alisha N Wade (DPhil; University of the Witwatersrand, South Africa); Novie O Younger-Coleman (PhD; The University of the West Indies, Jamaica); Prof Tomasz Zdrojewski (MD; Medical University of Gdansk, Poland); Prof Majid Ezzati (PhD; Imperial College London, UK; University of Ghana, Ghana)

Country and Regional Data (\* equal contribution; listed alphabetically)

Leandra Abarca-Gómez (Caja Costarricense de Seguro Social, Costa Rica)\*; Mohsen Abbasi-Kangevari (Non-Communicable Diseases Research Center, Iran)\*; Hanan F Abdul Rahim (Qatar University, Qatar)\*; Niveen M Abu-Rmeileh (Birzeit University, State of Palestine)\*; Shalkar Adambekov (Al-Farabi Kazakh National University, Kazakhstan; Academy of Preventive Medicine, Kazakhstan)\*; Robert J Adams (Flinders University, Australia)\*; Wichai Aekplakorn (Mahidol University, Thailand)\*; Shoab Afzal (Copenhagen University Hospital - Herlev and Gentofte, Denmark; University of Copenhagen, Denmark)\*; Imelda A Agdeppa (Food and Nutrition Research Institute, Philippines)\*; Javad Aghazadeh-Attari (Urmia University of Medical Sciences, Iran)\*; Carlos A Aguilar-Salinas (Instituto Nacional de Ciencias Médicas y Nutrición, Mexico)\*; Charles Agyemang (University of Amsterdam, The Netherlands)\*; Noor Ani Ahmad (Ministry of Health, Malaysia)\*; Ali Ahmadi (Shahrekord University of Medical Sciences, Iran)\*; Naser Ahmadi (Non-Communicable Diseases Research Center, Iran)\*; Nastaran Ahmadi (Shahid Sadoughi University of Medical Sciences, Iran)\*; Soheir H Ahmed (University of Hargeisa, Somaliland)\*; Wolfgang Ahrens (Leibniz Institute for Prevention Research and Epidemiology - BIPS, Germany)\*; Kamel Ajlouni (National Center for Diabetes, Endocrinology and Genetics, Jordan)\*; Sarah F Al-Hamli (Kuwait Institute for Scientific Research, Kuwait)\*; Halima Al-Hinai (Ministry of Health, Oman)\*; Jawad A Al-Lawati (Ministry of Health, Oman)\*; Deena Al Asfoor (World Health Organization Regional Office for the Eastern Mediterranean, Egypt)\*; Monira Alarouj (Dasman Diabetes Institute, Kuwait)\*; Fadia AlBuhairan (Aldara Hospital and Medical Center, Saudi Arabia)\*; Shahla AlDhukair (King Abdullah International Medical Research Center, Saudi Arabia)\*;



Mohamed M Ali (World Health Organization, Switzerland)\*; Mohammed K Ali (Emory University, USA)\*; Anna V Alieva (Ministry of Health, Uzbekistan)\*; Farbod Alinezhad (Northeastern University, USA)\*; Abdullah Alkandari (Dasman Diabetes Institute, Kuwait)\*; Ala'a Alkerwi (Directorate of Health, Luxembourg)\*; Eman Aly (World Health Organization Regional Office for the Eastern Mediterranean, Egypt)\*; Deepak N Amarapurkar (Bombay Hospital and Medical Research Centre, India)\*; Lars Bo Andersen (Western Norway University of Applied Sciences, Norway)\*; Sigmund A Anderssen (Norwegian School of Sport Sciences, Norway)\*; Dolores S Andrade (Universidad de Cuenca, Ecuador)\*; Ranjit Mohan Anjana (Madras Diabetes Research Foundation, India)\*; Alireza Ansari-Moghaddam (Health Promotion Research Center, Iran)\*; Hajer Aounallah-Skhiri (National Institute of Public Health, Tunisia)\*; Joana Araújo (University of Porto, Portugal)\*; Tahir Aris (Ministry of Health, Malaysia)\*; Raphael E Arku (University of Massachusetts Amherst, USA)\*; Nimmathota Arlappa (ICMR - National Institute of Nutrition, India)\*; Krishna K Aryal (University of Bergen, Norway)\*; Thor Aspelund (University of Iceland, Iceland)\*; Felix K Assah (University of Yaoundé 1, Cameroon)\*; Batyrbek Assembekov (Asfendiyarov Kazakh National Medical University, Kazakhstan)\*; Shiu Lun Au Yeung (The University of Hong Kong, China)\*; Juha Auvinen (Oulu University Hospital, Finland; University of Oulu, Finland)\*; Mária Avdičová (Regional Authority of Public Health, Slovakia)\*; Kishwar Azad (Diabetic Association of Bangladesh, Bangladesh)\*; Ana Azevedo (University of Porto, Portugal)\*; Mohsen Azimi-Nezhad (Neyshabur University of Medical Sciences, Iran)\*; Fereidoun Azizi (Research Institute for Endocrine Sciences, Iran)\*; Flora Bacopoulou (National and Kapodistrian University of Athens, Greece)\*; Nagalla Balakrishna (ICMR - National Institute of Nutrition, India)\*; Yulia Balanova (National Medical Research Centre for Therapy and Preventive Medicine, Russia)\*; Mohamed Bamoshmoosh (University of Science and Technology, Yemen)\*; Maciej Banach (The John Paul II Catholic University of Lublin, Poland)\*; Piotr Bandosz (Medical University of Gdańsk, Poland)\*; José R Banegas (CIBERESP, Spain; Universidad Autónoma de Madrid, Spain)\*; Carlo M Barbagallo (University of Palermo, Italy)\*; Alberto Barcelo (University of Miami, USA)\*; Maja Baretić (University Hospital Centre Zagreb,

Croatia)\*; Lena Barrera (Universidad del Valle, Colombia)\*; Marta Barreto (National Institute of Health Doutor Ricardo Jorge, Portugal; NOVA University Lisbon, Portugal)\*; Abdul Basit (Diabetic Association of Pakistan, Pakistan; Health Promotion Foundation, Pakistan)\*; Anwar M Batieha (Jordan University of Science and Technology, Jordan)\*; Aline P Batista (Universidade Federal de Ouro Preto, Brazil)\*; Louise A Baur (University of Sydney, Australia)\*; Antonisamy Belavendra (Christian Medical College Vellore, India)\*; Habiba Ben Romdhane (University Tunis El Manar, Tunisia)\*; Theodora Benedek (University of Medicine, Pharmacy, Sciences and Technology of Târgu-Mureș, Romania)\*; Mikhail Benet (Cafam University Foundation, Colombia)\*; Michaela Benzeval (University of Essex, UK)\*; Salim Berkinbayev (Kazakh National Medical University, Kazakhstan)\*; Antonio Bernabe-Ortiz (Universidad Científica del Sur, Peru)\*; Ximena Berrios Carrasola (Pontificia Universidad Católica de Chile, Chile)\*; Heloísa Bettiol (University of São Paulo, Brazil)\*; Augustin F Beybey (University of Yaoundé 1, Cameroon)\*; Santosh K Bhargava (Sunder Lal Jain Hospital, India)\*; Yufang Bi (Shanghai Jiao-Tong University School of Medicine, China)\*; Elysée Claude Bika Lele (Institute of Medical Research and Medicinal Plant Studies, Cameroon)\*; Mukharram M Bikbov (Ufa Eye Research Institute of the Bashkir State Medical University, Russia)\*; Bihungum Bista (Nepal Health Research Council, Nepal)\*; Peter Bjerregaard (University of Southern Denmark, Denmark)\*; Espen Bjertness (University of Oslo, Norway)\*; Marius B Bjertness (University of Oslo, Norway)\*; Cecilia Björkelund (University of Gothenburg, Sweden)\*; Katia V Bloch (Universidade Federal do Rio de Janeiro, Brazil)\*; Anneke Blokstra (National Institute for Public Health and the Environment, The Netherlands)\*; Martin Bobak (University College London, UK)\*; Bernhard O Boehm (Nanyang Technological University, Singapore)\*; Jose G Boggia (Universidad de la República, Uruguay)\*; Carlos P Boissonnet (Centro de Educación Médica e Investigaciones Clínicas, Argentina)\*; Stig E Bojesen (Copenhagen University Hospital - Herlev and Gentofte, Denmark; University of Copenhagen, Denmark)\*; Marialaura Bonaccio (IRCCS Neuromed, Italy)\*; Alice Bonilla-Vargas (Caja Costarricense de Seguro Social, Costa Rica)\*; Herman Borghs (KU Leuven, Belgium)\*; Steve Botomba (University of Kinshasa, DR Congo)\*; Pascal Bovet (Ministry of Health, Seychelles);

Unisanté, Switzerland)\*; Imperia Brajkovich (Universidad Central de Venezuela, Venezuela)\*; Hermann Brenner (German Cancer Research Center, Germany)\*; Lizzy M Brewster (University of Amsterdam, The Netherlands)\*; Garry R Brian (The Fred Hollows Foundation, New Zealand)\*; Yajaira Briceño (University of the Andes, Venezuela)\*; Miguel Brito (Instituto Politécnico de Lisboa, Portugal)\*; Gloria Bueno (University of Zaragoza, Spain)\*; Anna Bugge (University College Copenhagen, Denmark)\*; Frank Buntinx (KU Leuven, Belgium)\*; Antonio Cabrera de León (Universidad de La Laguna, Spain)\*; Roberta B Caixeta (Pan American Health Organization, USA)\*; Günay Can (Istanbul University, Türkiye)\*; Ana Paula C Cândido (Universidade Federal de Juiz de Fora, Brazil)\*; Mario V Capanzana (Food and Nutrition Research Institute, Philippines)\*; Naděžda Čapková (National Institute of Public Health, Czechia)\*; Eduardo Capuano (Canopo Study Center - Salerno, Italy)\*; Rocco Capuano (Canopo Study Center - Salerno, Italy)\*; Vincenzo Capuano (Canopo Study Center - Salerno, Italy)\*; Viviane C Cardoso (University of São Paulo, Brazil)\*; Axel C Carlsson (Karolinska Institutet, Sweden)\*; Rodrigo M Carrillo-Larco (Emory University, USA)\*; Felipe F Casanueva (Santiago de Compostela University, Spain)\*; Laura Censi (Council for Agricultural Research and Economics, Italy)\*; Marvin Cervantes-Loaiza (Caja Costarricense de Seguro Social, Costa Rica)\*; Charalambos A Chadjigeorgiou (Research and Education Institute of Child Health, Cyprus)\*; Parinya Chamnan (Sanpasitthiprasong Regional Hospital, Thailand)\*; Snehalatha Chamukuttan (India Diabetes Research Foundation, India)\*; Queenie Chan (Imperial College London, UK)\*; Fadi J Charchar (Federation University Australia, Australia)\*; Nish Chaturvedi (University College London, UK)\*; Chien-Jen Chen (Academia Sinica, Taiwan)\*; Huashuai Chen (Xiangtan University, China)\*; Long-Sheng Chen (Ministry of Health and Welfare, Taiwan)\*; Ching-Yu Cheng (National University of Singapore, Singapore)\*; Bahman Cheraghian (Ahvaz Jundishapur University of Medical Sciences, Iran)\*; Angela Chetrit (The Gertner Institute for Epidemiology and Health Policy Research, Israel)\*; Shu-Ti Chiou (Ministry of Health and Welfare, Taiwan)\*; María-Dolores Chirlaque (CIBERESP, Spain)\*; Jerzy Chudek (Medical University of Silesia, Poland)\*; Renata Cifkova (Charles University, Czechia; Thomayer University Hospital, Czechia)\*; Massimo Cirillo (University of

Salerno, Italy)\*; Frank Claessens (KU Leuven, Belgium)\*; Janine Clarke (Statistics Canada, Canada)\*; Emmanuel Cohen (UMR CNRS-MNHN 7206, France)\*; Hans Concini (Agency for Preventive and Social Medicine, Austria)\*; Cyrus Cooper (University of Southampton, UK)\*; Cojocaru R Cosmin (Carol Davila University of Medicine and Pharmacy, Romania)\*; Simona Costanzo (IRCCS Neuromed, Italy)\*; Melanie J Cowan (World Health Organization, Switzerland)\*; Chris Cowell (University of Sydney, Australia)\*; Amelia C Crampin (Malawi Epidemiology and Intervention Research Unit, Malawi)\*; Ana B Crujeiras (CIBEROBN, Spain)\*; Juan J Cruz (CIBERESP, Spain; Universidad Autónoma de Madrid, Spain)\*; Felipe V Cureau (Universidade Federal do Rio Grande do Norte, Brazil)\*; Sarah Cuschieri (University of Malta, Malta)\*; Graziella D'Arrigo (National Research Council, Italy)\*; Eleonora d'Orsi (Universidade Federal de Santa Catarina, Brazil)\*; Haroldo da Silva-Ferreira (Universidade Federal de Alagoas, Brazil)\*; Jean Dallongeville (Institut Pasteur de Lille, France)\*; Albertino Damasceno (Eduardo Mondlane University, Mozambique)\*; Rachel Dankner (The Gertner Institute for Epidemiology and Health Policy Research, Israel)\*; Saeed Dastgiri (Tabriz Health Services Management Research Center, Iran)\*; Luc Dauchet (University of Lille, France; Lille University Hospital, France)\*; Kairat Davletov (Asfendiyarov Kazakh National Medical University, Kazakhstan)\*; Amalia De Curtis (IRCCS Neuromed, Italy)\*; Giovanni de Gaetano (IRCCS Neuromed, Italy)\*; Stefaan De Henauw (Ghent University, Belgium)\*; David De Ridder (University of Geneva, Switzerland)\*; Mohan Deepa (Madras Diabetes Research Foundation, India)\*; Vincent Jr DeGennaro (Innovating Health International, Haiti)\*; Stefaan Demarest (Sciensano, Belgium)\*; Elaine Dennison (University of Southampton, UK)\*; Valérie Deschamps (The National Public Health Agency, France)\*; Meghnath Dhimal (Nepal Health Research Council, Nepal)\*; Zivka Dika (University of Zagreb, Croatia)\*; Shirin Djalalinia (Ministry of Health and Medical Education, Iran)\*; Chiara Donfrancesco (Istituto Superiore di Sanità, Italy)\*; Maria Dorobantu (Carol Davila University of Medicine and Pharmacy, Romania)\*; Nico Dragano (University Hospital Düsseldorf, Germany)\*; Wojciech Drygas (Medical University of Lodz, Poland; Calisia University, Poland)\*; Shufa Du (University of North Carolina at Chapel Hill, USA)\*; Yong Du (Robert Koch Institute, Germany)\*; Charmaine

A Duante (Food and Nutrition Research Institute, Philippines)\*; Priscilla Duboz (IRL 3189 ESS, France)\*; Rosemary B Duda (Beth Israel Deaconess Medical Center, USA; Harvard Medical School, USA)\*; Anar Dushpanova (Scuola Superiore Sant'Anna, Italy; Al-Farabi Kazakh National University, Kazakhstan)\*; Vilnis Dzerve (University of Latvia, Latvia)\*; Elzbieta Dziankowska-Zaborszczyk (Medical University of Lodz, Poland)\*; Narges Ebrahimi (Non-Communicable Diseases Research Center, Iran)\*; Ricky Eddie (Ministry of Health and Medical Services, Solomon Islands)\*; Ebrahim Eftekhari (Hormozgan University of Medical Sciences, Iran)\*; Vasiliki Efthymiou (National and Kapodistrian University of Athens, Greece)\*; Eruke E Egbagbe (University of Benin, Nigeria)\*; Robert Eggertsen (University of Gothenburg, Sweden)\*; Sareh Eghtesad (Tehran University of Medical Sciences, Iran)\*; Clara Ladi Ejembi (Ahmadu Bello University, Nigeria)\*; Mohammad El-Khateeb (National Center for Diabetes, Endocrinology and Genetics, Jordan)\*; Jalila El Ati (National Institute of Nutrition and Food Technology, Tunisia)\*; Denise Eldemire-Shearer (The University of the West Indies, Jamaica)\*; Roberto Elosua (Institut Hospital del Mar d'Investigacions Mèdiques, Spain; CIBERCV, Spain)\*; Ofem Enang (University of Calabar, Nigeria)\*; Rajiv T Erasmus (Stellenbosch University, South Africa)\*; Cihangir Erem (Imperial Hospital, Türkiye)\*; Gul Ergor (Dokuz Eylul University, Türkiye)\*; Louise Eriksen (University of Southern Denmark, Denmark)\*; Johan G Eriksson (University of Helsinki, Finland)\*; Ali Esmaeili (Rafsanjan University of Medical Sciences, Iran)\*; Roger G Evans (Monash University, Australia)\*; Guy Fagherazzi (Luxembourg Institute of Health, Luxembourg)\*; Noushin Fahimfar (Tehran University of Medical Sciences, Iran)\*; Ildar Fakhradiyev (Kazakh National Medical University, Kazakhstan)\*; Albina A Fakhretdinova (Ufa Eye Research Institute, Russia)\*; Caroline H Fall (University of Southampton, UK)\*; Elnaz Faramarzi (Tabriz University of Medical Sciences, Iran)\*; Mojtaba Farjam (Fasa University of Medical Sciences, Iran)\*; Farshad Farzadfar (World Health Organization, Switzerland)\*; Yosef Farzi (Non-Communicable Diseases Research Center, Iran)\*; Mohammad Reza Fattahi (Shiraz University of Medical Sciences, Iran)\*; Asher Fawwad (Baqai Medical University, Pakistan)\*; Francisco J Felix-Redondo (Centro de Salud Villanueva Norte, Spain)\*; Trevor S Ferguson (The University of the West Indies, Jamaica)\*;

Daniel Fernández-Bergés (Hospital Don Benito-Villanueva de la Serena, Spain)\*; Desha R Fernando (University of Colombo, Sri Lanka)\*; Thomas Ferrao (Statistics Canada, Canada)\*; Marika Ferrari (Council for Agricultural Research and Economics, Italy)\*; Marco M Ferrario (University of Insubria, Italy)\*; Catterina Ferreccio (Pontificia Universidad Católica de Chile, Chile)\*; Eldridge Ferrer (Food and Nutrition Research Institute, Philippines)\*; Edith JM Feskens (Wageningen University, The Netherlands)\*; Günther Fink (Swiss Tropical and Public Health Institute, Switzerland; University of Basel, Switzerland)\*; David Flood (Wuqu' Kawoq, Guatemala)\*; Maria Forsner (Umeå University, Sweden)\*; Sandrine Fosse-Edorh (French Public Health Agency, France)\*; Edward F Fottrell (University College London, UK)\*; Heba M Fouad (World Health Organization Regional Office for the Eastern Mediterranean, Egypt)\*; Damian K Francis (Georgia College and State University, USA)\*; Guillermo Frontera (Hospital Universitario Son Espases, Spain)\*; Isti I Fujiati (Universitas Sumatera Utara, Indonesia)\*; Matsuda Fumihiko (Kyoto University, Japan)\*; Takuro Furusawa (Kyoto University, Japan)\*; Zbigniew Gaciong (Medical University of Warsaw, Poland)\*; Fabio Galvano (University of Catania, Italy)\*; Sarah P Garnett (University of Sydney, Australia)\*; Jean-Michel Gaspoz (Geneva University Hospitals, Switzerland)\*; Magda Gasull (CIBERESP, Spain; Hospital del Mar Research Institute, Spain)\*; Andrea Gazzinelli (Universidade Federal de Minas Gerais, Brazil)\*; Ulrike Gehring (Utrecht University, The Netherlands)\*; Ebrahim Ghaderi (Kurdistan University of Medical Sciences, Iran)\*; Seyyed-Hadi Ghamari (Non-Communicable Diseases Research Center, Iran)\*; Ali Ghanbari (Non-Communicable Diseases Research Center, Iran)\*; Erfan Ghasemi (Non-Communicable Diseases Research Center, Iran)\*; Oana-Florentina Gheorghe-Fronea (Carol Davila University of Medicine and Pharmacy, Romania)\*; Anup Ghimire (B P Koirala Institute of Health Sciences, Nepal)\*; Alessandro Gialluisi (IRCCS Neuromed, Italy; "Giuseppe Degennaro" LUM University, Italy)\*; Simona Giampaoli (Istituto Superiore di Sanità, Italy)\*; Francesco Gianfagna (University of Insubria, Italy; Mediterranea Cardiocentro, Italy)\*; Tiffany K Gill (University of Adelaide, Australia)\*; Jonathan Giovannelli (University of Lille, France; Lille University Hospital, France)\*; Glen Gironella (Food and Nutrition Research Institute, Philippines)\*; Aleksander Giwercman (Lund University, Sweden)\*;

Marcel Goldberg (Institut National de la Santé et de la Recherche Médicale, France; Paris Cité University, France)\*; David Goltzman (McGill University, Canada)\*; Aleksandra Gomula (PASs Hirsfeld Institute of Immunology and Experimental Therapy, Poland)\*; Helen Gonçalves (Universidade Federal de Pelotas, Brazil)\*; Mauer Gonçalves (University Agostinho Neto, Angola)\*; David A Gonzalez-Chica (University of Adelaide, Australia)\*; Marcela Gonzalez-Gross (Universidad Politécnica de Madrid, Spain)\*; Juan P González-Rivas (St. Ann's University Hospital, Czechia)\*; Angel R Gonzalez (Universidad Autónoma de Santo Domingo, Dominican Republic)\*; Atsushi Goto (National Cancer Center, Japan)\*; Frederic Gottrand (University of Lille, France)\*; Dušan Grafnetter (Institute for Clinical and Experimental Medicine, Czechia)\*; Maria G Grammatikopoulou (University of Thessaly, Greece)\*; Andriene Grant (Ministry of Health and Wellness, Jamaica)\*; Anne Sameline Grimsgaard (UiT the Arctic University of Tromsø, Norway)\*; Tomasz Grodzicki (Jagiellonian University Medical College, Poland)\*; Anders Grøntved (University of Southern Denmark, Denmark)\*; Giuseppe Grosso (University of Catania, Italy)\*; Dongfeng Gu (National Center of Cardiovascular Diseases, China)\*; Vilmundur Gudnason (University of Iceland, Iceland)\*; Ramiro Guerrero (Universidad Icesi, Colombia)\*; Idris Guessous (Geneva University Hospitals, Switzerland)\*; Unjali P Gujral (Emory University, USA)\*; Rajeev Gupta (Eternal Heart Care Centre and Research Institute, India)\*; Laura Gutierrez (Institute for Clinical Effectiveness and Health Policy, Argentina)\*; Xinyi Gwee (National University of Singapore, Singapore)\*; Seongjun Ha (National Health Insurance Service, Republic of Korea)\*; Rosa Haghshenas (Non-Communicable Diseases Research Center, Iran)\*; Hamid Hakimi (Rafsanjan University of Medical Sciences, Iran)\*; Ian R Hambleton (The University of the West Indies, Barbados)\*; Behrooz Hamzeh (Kermanshah University of Medical Sciences, Iran)\*; Dominique Hange (University of Gothenburg, Sweden)\*; Sari Hantunen (University of Eastern Finland, Finland)\*; Jie Hao (Capital Medical University Beijing Tongren Hospital, China)\*; Javad Harooni (Yasuj University of Medical Sciences, Iran)\*; Seyed Mohammad Hashemi-Shahri (Zahedan University of Medical Sciences, Iran)\*; Jun Hata (Kyushu University, Japan)\*; Alison J Hayes (University of Sydney, Australia)\*; Jiang He (Tulane

University, USA)\*; Christin Heidemann (Robert Koch Institute, Germany)\*; Rafael dos Santos Henrique (Universidade Federal de Pernambuco, Brazil)\*; Ana Henriques (University of Porto, Portugal)\*; Sauli Herrala (Oulu University Hospital, Finland)\*; Karl-Heinz Herzig (University of Oulu, Finland; Oulu University Hospital, Finland)\*; Ramin Heshmat (Chronic Diseases Research Center, Iran)\*; Allan G Hill (University of Southampton, UK)\*; Sai Yin Ho (The University of Hong Kong, China)\*; Michelle Holdsworth (French National Research Institute for Sustainable Development, France)\*; Reza Homayounfar (Shahid Beheshti University of Medical Sciences, Iran)\*; Wilma M Hopman (Kingston Health Sciences Centre, Canada)\*; Andrea RVR Horimoto (University of São Paulo, Brazil)\*; Claudia Hormiga (Universidad Autónoma de Bucaramanga, Colombia)\*; Bernardo L Horta (Universidade Federal de Pelotas, Brazil)\*; Leila Houti (University Oran 1, Algeria)\*; Christina Howitt (The University of the West Indies, Barbados)\*; Thein Thein Htay (Independent Public Health Specialist, Myanmar)\*; Aung Soe Htet (UiT The Arctic University of Norway, Norway)\*; Maung Maung Than Htike (Ministry of Health and Sports, Myanmar)\*; José María Huerta (CIBERESP, Spain)\*; Ilpo Tapani Huhtaniemi (Imperial College London, UK)\*; Laetitia Huiart (Santé publique France, France)\*; Martijn Huisman (Vrije Universiteit Amsterdam, The Netherlands)\*; Monica Hunsberger (University of Gothenburg, Sweden)\*; Abdullatif Hussein (Birzeit University, State of Palestine)\*; Inge Huybrechts (International Agency for Research on Cancer, France)\*; Licia Iacoviello (IRCCS Neuromed, Italy; "Giuseppe Degennaro" LUM University, Italy)\*; Ellina M Iakupova (Ufa Eye Research Institute, Russia)\*; Anna G Iannone (Gaetano Fucito Hospital, Italy)\*; Norazizah Ibrahim Wong (Ministry of Health, Malaysia)\*; Chinwuba Ijoma (University of Nigeria, Nigeria)\*; Nayu Ikeda (National Institutes of Biomedical Innovation, Health and Nutrition, Japan)\*; Vilma E Irazola (Institute for Clinical Effectiveness and Health Policy, Argentina)\*; Takafumi Ishida (The University of Tokyo, Japan)\*; Sheikh Mohammed Shariful Islam (Deakin University, Australia)\*; Duygu Islek (Emory University, USA)\*; Till Ittermann (University Medicine Greifswald, Germany)\*; Masanori Iwasaki (Hokkaido University, Japan)\*; Tuija Jääskeläinen (Finnish Institute for Health and Welfare, Finland)\*; Jeremy M Jacobs (Hadassah University Medical Center, Israel)\*; Hashem Y Jaddou (Jordan University of



Science and Technology, Jordan)\*; Michel Jadoul (Université Catholique de Louvain, Belgium)\*; Bakary Jallow (Gambia National Nutrition Agency, The Gambia)\*; Kenneth James (The University of the West Indies, Jamaica)\*; Kazi M Jamil (Kuwait Institute for Scientific Research, Kuwait)\*; Edward Janus (University of Melbourne, Australia)\*; Marjo-Riitta Jarvelin (Imperial College London, UK; University of Oulu, Finland)\*; Grazyna Jasienska (Jagiellonian University Medical College, Poland)\*; Ana Jelaković (University Hospital Centre Zagreb, Croatia)\*; Bojan Jelaković (University of Zagreb, Croatia)\*; Garry Jennings (Heart Foundation, Australia)\*; Anjani Kumar Jha (Nepal Health Research Council, Nepal)\*; AM Jibo (University of Bisha, Saudi Arabia)\*; Ramon O Jimenez (Universidad Eugenio Maria de Hostos, Dominican Republic)\*; Karl-Heinz Jöckel (University of Duisburg-Essen, Germany)\*; Jari J Jokelainen (Oulu University Hospital, Finland)\*; Jost B Jonas (Rothschild Foundation Hospital, France)\*; Josipa Josipović (University Hospital Centre Sestre Milosrdnice, Croatia)\*; Farahnaz Joukar (Guilan University of Medical Sciences, Iran)\*; Jacek Józwiak (University of Opole, Poland)\*; Anthony Kafatos (University of Crete, Greece)\*; Eero O Kajantie (Finnish Institute for Health and Welfare, Finland)\*; Zhanna Kalamatayeva (Al-Farabi Kazakh National University, Kazakhstan)\*; Ofra Kalter-Leibovici (The Gertner Institute for Epidemiology and Health Policy Research, Israel)\*; Argyro Karakosta (National and Kapodistrian University of Athens, Greece)\*; Khem B Karki (Maharajgunj Medical Campus, Nepal)\*; Marzieh Katibeh (Aarhus University, Denmark)\*; Prasad Katulanda (University of Colombo, Sri Lanka)\*; Jussi Kauhanen (University of Eastern Finland, Finland)\*; Gylli M Kazakbaeva (Ufa Eye Research Institute, Russia)\*; François F Kaze (University of Yaoundé 1, Cameroon)\*; Calvin Ke (University of Toronto, Canada)\*; Sirkka Keinänen-Kiukaanniemi (Oulu University Hospital, Finland)\*; Roya Kelishadi (Isfahan University of Medical Sciences, Iran)\*; Andre P Kengne (South African Medical Research Council, South Africa)\*; Maryam Keramati (Mashhad University of Medical Sciences, Iran)\*; Mathilde Kersting (Research Institute of Child Nutrition, Germany)\*; Yousef Saleh Khader (Jordan University of Science and Technology, Jordan)\*; Kazem Khalagi (Tehran University of Medical Sciences, Iran)\*; Arsalan Khaledifar (Shahrekord University of Medical Sciences, Iran)\*; Davood Khalili (Shahid Beheshti

University of Medical Sciences, Iran)\*; Young-Ho Khang (Seoul National University College of Medicine, Republic of Korea)\*; Bahareh Kheiri (Shahid Beheshti University of Medical Sciences, Iran)\*; Motahareh Kheradmand (Mazandaran University of Medical Sciences, Iran)\*; Alireza Khosravi Farsani (Hypertension Research Center, Iran)\*; Ursula Kiechl-Kohlendorfer (Medical University of Innsbruck, Austria)\*; Sophia J Kiechl (VASCage Research Centre on Vascular Ageing and Stroke, Austria)\*; Stefan Kiechl (Medical University of Innsbruck, Austria; VASCage Research Centre on Vascular Ageing and Stroke, Austria)\*; Hyeon Chang Kim (Yonsei University College of Medicine, Republic of Korea)\*; Andrew Kingston (Newcastle University, UK)\*; Heidi Klakk (University College South Denmark, Denmark)\*; Jana Klanova (Masaryk University, Czechia)\*; Michael Knoflach (Medical University of Innsbruck, Austria)\*; Patrick Kolsteren (Ghent University, Belgium)\*; Jürgen König (University of Vienna, Austria)\*; Raija Korpelainen (University of Oulu, Finland)\*; Paul Korrovits (Tartu University Clinics, Estonia)\*; Jelena Kos (University Hospital Centre Zagreb, Croatia)\*; Seppo Koskinen (Finnish Institute for Health and Welfare, Finland)\*; Sudhir Kowlessur (Ministry of Health and Wellness, Mauritius)\*; Slawomir Koziel (PASs Hirsfeld Institute of Immunology and Experimental Therapy, Poland)\*; Wolfgang Kratzer (University Hospital Ulm, Germany)\*; Susi Kriemler (University of Zurich, Switzerland)\*; Peter Lund Kristensen (University of Southern Denmark, Denmark)\*; Steinar Krokstad (Norwegian University of Science and Technology, Norway)\*; Daan Kromhout (University of Groningen, The Netherlands)\*; Ruzena Kubinova (National Institute of Public Health, Czechia)\*; Urho M Kujala (University of Jyväskylä, Finland)\*; Mukhtar Kulimbet (Al-Farabi Kazakh National University, Kazakhstan; Asfendiyarov Kazakh National Medical University, Kazakhstan)\*; Vaitheeswaran Kulothungan (ICMR - National Centre for Disease Informatics and Research, India)\*; Meena Kumari (University of Essex, UK)\*; Vladimir Kutsenko (National Medical Research Centre for Therapy and Preventive Medicine, Russia)\*; Catherine Kyobutungi (African Population and Health Research Center, Kenya)\*; Quang Ngoc La (Hanoi University of Public Health, Vietnam)\*; Tiina Laatikainen (University of Eastern Finland, Finland; Finnish Institute for Health and Welfare, Finland)\*; Demetre Labadarios (Stellenbosch University, South Africa; University of Limpopo, South

Africa)\*; Carl Lachat (Ghent University, Belgium)\*; Youcef Laid (Ministry of Health, Algeria)\*; Lachmie Lall (Ministry of Health, Guyana)\*; Anne Langsted (Copenhagen University Hospital - Herlev and Gentofte, Denmark; University of Copenhagen, Denmark)\*; Tiina Lankila (Oulu Deaconess Institute Foundation, Finland)\*; Vera Lanska (Institute for Clinical and Experimental Medicine, Czechia)\*; Georg Lappas (Sahlgrenska Academy, Sweden)\*; Bagher Larijani (Endocrinology and Metabolism Research Center, Iran)\*; Tint Swe Latt (University of Public Health, Myanmar)\*; Martino Laurenzi (Centro Studi Epidemiologici di Gubbio, Italy)\*; Avula Laxmaiah (ICMR - National Institute of Nutrition, India)\*; Gwenaëlle Le Coroller (Luxembourg Institute of Health, Luxembourg)\*; Jeannette Lee (National University of Singapore, Singapore; National University Health System, Singapore)\*; Terho Lehtimäki (Tampere University Hospital, Finland; Tampere University, Finland)\*; Daniel Lemogoum (University of Douala, Cameroon)\*; Gabriel M Leung (The University of Hong Kong, China)\*; Charlie Lim (National University of Singapore, Singapore; National University Health System, Singapore)\*; Wei-Yen Lim (Tan Tock Seng Hospital, Singapore)\*; M Fernanda Lima-Costa (Fundação Oswaldo Cruz, Brazil)\*; Hsien-Ho Lin (National Taiwan University, Taiwan)\*; Yi-Jing Lin (Ministry of Health and Welfare, Taiwan)\*; Lars Lind (Uppsala University, Sweden)\*; Lauren Lissner (University of Gothenburg, Sweden)\*; Liping Liu (Beijing Center for Disease Prevention and Control, China)\*; Xiaotian Liu (Zhengzhou University, China)\*; Wei-Cheng Lo (Taipei Medical University, Taiwan)\*; Helle-Mai Loit (National Institute for Health Development, Estonia)\*; Esther Lopez-Garcia (CIBERESP, Spain; Universidad Autónoma de Madrid, Spain)\*; Tania Lopez (Universidad San Martín de Porres, Peru)\*; José Eugenio Lozano (Consejería de Sanidad Junta de Castilla y León, Spain)\*; Dalia Luksiene (Lithuanian University of Health Sciences, Lithuania)\*; Annamari Lundqvist (Finnish Institute for Health and Welfare, Finland)\*; Nuno Lunet (University of Porto, Portugal)\*; Thomas Lung (University of Sydney, Australia)\*; Michala Lustigová (Charles University, Czechia; National Institute of Public Health, Czechia)\*; Guansheng Ma (Peking University, China)\*; George LL Machado-Coelho (Universidade Federal de Ouro Preto, Brazil)\*; Aristides M Machado-Rodrigues (University of Coimbra, Portugal)\*; Enguerran Macia (UMR 7268 ADES, France)\*; Luisa M

Macieira (Coimbra University Hospital Center, Portugal)\*; Ahmed A Madar (University of Oslo, Norway)\*; Gladys E Maestre (University of Texas Rio Grande Valley, USA)\*; Stefania Maggi (Institute of Neuroscience of the National Research Council, Italy)\*; Dianna J Magliano (Baker Heart and Diabetes Institute, Australia)\*; Emmanuella Magriplis (Agricultural University of Athens, Greece)\*; Gowri Mahasampath (Christian Medical College Vellore, India)\*; Bernard Maire (French National Research Institute for Sustainable Development, France)\*; Marcia Makdisse (Academia VBHC, Brazil)\*; Konstantinos Makrilakis (National and Kapodistrian University of Athens, Greece)\*; Mohammad-Reza Malekpour (Non-Communicable Diseases Research Center, Iran)\*; Fatemeh Malekzadeh (Tehran University of Medical Sciences, Iran)\*; Reza Malekzadeh (Shiraz University of Medical Sciences, Iran; Tehran University of Medical Sciences, Iran)\*; Sofia Malyutina (Institute of Internal and Preventive Medicine, Russia)\*; Lynell V Maniego (Food and Nutrition Research Institute, Philippines)\*; Yannis Manios (Harokopio University, Greece)\*; Fariborz Mansour-Ghanaei (Guilan University of Medical Sciences, Iran)\*; Enzo Manzato (University of Padua, Italy)\*; Mala Ali Mapatano (University of Kinshasa, DR Congo)\*; Anie Marcil (Statistics Canada, Canada)\*; Francisco Mardones (Pontificia Universidad Católica de Chile, Chile)\*; Paula Margozzini (Pontificia Universidad Católica de Chile, Chile)\*; Pedro Marques-Vidal (Lausanne University Hospital, Switzerland; University of Lausanne, Switzerland)\*; Larissa Pruner Marques (Fundação Oswaldo Cruz, Brazil)\*; Reynaldo Martorell (Emory University, USA)\*; Luis P Mascarenhas (Universidade Estadual do Centro-Oeste, Brazil)\*; Mannix Masimango Imani (Université Catholique de Bukavu, DR Congo)\*; Masoud Masinaei (Non-Communicable Diseases Research Center, Iran)\*; Shariq R Masoodi (Sher-i-Kashmir Institute of Medical Sciences, India)\*; Ellisiv B Mathiesen (UiT The Arctic University of Norway, Norway)\*; Prashant Mathur (ICMR - National Centre for Disease Informatics and Research, India)\*; Tandi E Matsha (Sefako Makgatho Health Sciences University, South Africa)\*; Jean Claude N Mbanya (University of Yaoundé 1, Cameroon)\*; Anselmo J Mc Donald Posso (Instituto Conmemorativo Gorgas de Estudios de la Salud, Panama)\*; Shelly R McFarlane (The University of the West Indies, Jamaica)\*; Stephen T McGarvey (Brown University, USA)\*; Scott B McLean (Statistics Canada, Canada)\*;

Breige A McNulty (University College Dublin, Ireland)\*; Sounnia Mediene Benchekor (University Oran 1, Algeria)\*; Kirsten Mehlig (University of Gothenburg, Sweden)\*; Amir Houshang Mehrparvar (Shahid Sadoughi University of Medical Sciences, Iran)\*; Jesus D Melgarejo (University of Texas Rio Grande Valley, USA)\*; Fabián Méndez (Universidad del Valle, Colombia)\*; Ana Maria B Menezes (Universidade Federal de Pelotas, Brazil)\*; Alibek Mereke (Al-Farabi Kazakh National University, Kazakhstan)\*; Indrapal I Meshram (ICMR - National Institute of Nutrition, India)\*; Diane T Meto (University of Abidjan, Côte d'Ivoire)\*; Nathalie Michels (Ghent University, Belgium)\*; Cláudia S Minderico (Universidade de Lisboa, Portugal)\*; GK Mini (Saveetha Dental College and Hospitals, India)\*; Juan Francisco Miquel (Pontificia Universidad Católica de Chile, Chile)\*; J Jaime Miranda (University of Sydney, Australia)\*; Mohammad Reza Mirjalili (Shahid Sadoughi University of Medical Sciences, Iran)\*; Daphne Mirkopoulou (Democritus University, Greece)\*; Pietro A Modesti (Università degli Studi di Firenze, Italy)\*; Sahar Saeedi Moghaddam (Non-Communicable Diseases Research Center, Iran)\*; Kazem Mohammad (Tehran University of Medical Sciences, Iran)\*; Mohammad Reza Mohammadi (Psychiatry and Psychology Research Center, Iran)\*; Zahra Mohammadi (Tehran University of Medical Sciences, Iran)\*; Noushin Mohammadifard (Isfahan Cardiovascular Research Center, Iran)\*; Reza Mohammadpourhodki (Mashhad University of Medical Sciences, Iran)\*; Viswanathan Mohan (Madras Diabetes Research Foundation, India)\*; Muhammad Fadhli Mohd Yusoff (Ministry of Health, Malaysia)\*; Iraj Mohebbi (Urmia University of Medical Sciences, Iran)\*; Niels C Møller (University of Southern Denmark, Denmark)\*; Dénes Molnár (University Medical School of Pécs, Hungary)\*; Amirabbas Momenan (Shahid Beheshti University of Medical Sciences, Iran)\*; Roger A Montenegro Mendoza (Gorgas Memorial Institute for Studies of Health, Panama)\*; Mahmood Moosazadeh (Mazandaran University of Medical Sciences, Iran)\*; Farhad Moradpour (Kurdistan University of Medical Sciences, Iran)\*; Alain Morejon (University of Medical Sciences of Cienfuegos, Cuba)\*; Luis A Moreno (CIBEROBN, Spain; Fundación Instituto de Investigación Sanitaria Aragón, Spain)\*; Karen Morgan (Royal College of Surgeons in Ireland, Ireland)\*; Suzanne N Morin (McGill University, Canada)\*; George Moschonis (La Trobe University, Australia)\*;

Alireza Moslem (Sabzevar University of Medical Sciences, Iran)\*; Mildrey Mosquera (Universidad del Valle, Colombia)\*; Malgorzata Mossakowska (International Institute of Molecular and Cell Biology, Poland)\*; Aya Mostafa (Ain Shams University, Egypt)\*; Seyed-Ali Mostafavi (Tehran University of Medical Sciences, Iran)\*; Eugen Mota (University of Medicine and Pharmacy Craiova, Romania)\*; Jorge Mota (University of Porto, Portugal)\*; Maria Mota (University of Medicine and Pharmacy Craiova, Romania)\*; Mohammad Esmaeel Motlagh (Ahvaz Jundishapur University of Medical Sciences, Iran)\*; Jorge Motta (Instituto Conmemorativo Gorgas de Estudios de la Salud, Panama)\*; Kelias P Msyamboza (World Health Organization Country Office, Malawi)\*; Thet Thet Mu (Department of Public Health, Myanmar)\*; Maria L Muiesan (University of Brescia, Italy)\*; Patricia B Munroe (Queen Mary University, UK)\*; Jaakko Mursu (University of Eastern Finland, Finland)\*; Kamarul Imran Musa (Universiti Sains Malaysia, Malaysia)\*; Norlaila Mustafa (Universiti Kebangsaan Malaysia, Malaysia)\*; Muel Telo MC Muyer (University of Kinshasa, DR Congo)\*; Iraj Nabipour (Bushehr University of Medical Sciences, Iran)\*; Gabriele Nagel (Ulm University, Germany)\*; Balkish M Naidu (Department of Statistics, Malaysia)\*; Farid Najafi (Kermanshah University of Medical Sciences, Iran)\*; Jana Námešná (Regional Authority of Public Health, Slovakia)\*; Ei Ei K Nang (National University of Singapore, Singapore; National University Health System, Singapore)\*; Vinay B Nangia (Suraj Eye Institute, India)\*; KM Venkat Narayan (Emory University, USA)\*; Take Naseri (Ministry of Health, Samoa)\*; Ana J Navarro-Ramírez (Caja Costarricense de Seguro Social, Costa Rica)\*; Nareemarn Neelapaichit (Mahidol University, Thailand)\*; Azim Nejatizadeh (Hormozgan University of Medical Sciences, Iran)\*; Ilona Nenko (Jagiellonian University Medical College, Poland)\*; Flavio Nervi (Pontificia Universidad Católica de Chile, Chile)\*; Tze Pin Ng (National University of Singapore, Singapore)\*; Chung T Nguyen (National Institute of Hygiene and Epidemiology, Vietnam)\*; Nguyen D Nguyen (University of Medicine and Pharmacy at Ho Chi Minh City, Vietnam)\*; Quang Ngoc Nguyen (Hanoi Medical University, Vietnam)\*; Michael Y Ni (The University of Hong Kong, China)\*; Peng Nie (Xi'an Jiaotong University, China)\*; Ramfis E Nieto-Martínez (Precision Care Clinic Corp, USA)\*; Guang Ning (Shanghai Jiao-Tong University School of Medicine, China)\*; Toshiharu Ninomiya (Kyushu

University, Japan)\*; Nobuo Nishi (National Institutes of Biomedical Innovation, Health and Nutrition, Japan)\*; Marianna Noale (Institute of Neuroscience of the National Research Council, Italy)\*; Oscar A Noboa (Universidad de la República, Uruguay)\*; Mitsuhiro Noda (International University of Health and Welfare, Japan)\*; Børge G Nordestgaard (Copenhagen University Hospital - Herlev and Gentofte, Denmark; University of Copenhagen, Denmark)\*; Davide Noto (University of Palermo, Italy)\*; Mohannad Al Nsour (Eastern Mediterranean Public Health Network, Jordan)\*; Irfan Nuhoğlu (Karadeniz Technical University, Türkiye)\*; Moffat Nyirenda (London School of Hygiene & Tropical Medicine, UK)\*; Terence W O'Neill (University of Manchester, UK)\*; Kyungwon Oh (Korea Disease Control and Prevention Agency, Republic of Korea)\*; Ryutaro Ohtsuka (Japan Wildlife Research Center, Japan; deceased)\*; Mohd Azahadi Omar (Ministry of Health, Malaysia)\*; Altan Onat (Istanbul University, Türkiye; deceased)\*; Sok King Ong (Ministry of Health, Brunei)\*; Obinna Onodugo (University of Nigeria, Nigeria)\*; Pedro Ordunez (Pan American Health Organization, USA)\*; Rui Ornelas (University of Madeira, Portugal)\*; Pedro J Ortiz (Universidad Peruana Cayetano Heredia, Peru)\*; Clive Osmond (University of Southampton, UK)\*; Afshin Ostovar (Tehran University of Medical Sciences, Iran)\*; Johanna A Otero (Universidad de Santander, Colombia)\*; Charlotte B Ottendahl (University of Southern Denmark, Denmark)\*; Akaninyene Otu (University of Calabar, Nigeria)\*; Ellis Owusu-Dabo (Kwame Nkrumah University of Science and Technology, Ghana)\*; Elena Pahomova (University of Latvia, Latvia)\*; Luigi Palmieri (Istituto Superiore di Sanità, Italy)\*; Wen-Harn Pan (Academia Sinica, Taiwan)\*; Demosthenes Panagiotakos (Harokopio University in Athens, Greece)\*; Songhomitra Panda-Jonas (University Hospital Heidelberg, Germany)\*; Zengchang Pang (Qingdao Centers for Disease Control and Prevention, China)\*; Francesco Panza (University of Bari Aldo Moro, Italy)\*; Mariela Paoli (University of the Andes, Venezuela)\*; Suyeon Park (Korea Disease Control and Prevention Agency, Republic of Korea)\*; Mahboubeh Parsaeian (Tehran University of Medical Sciences, Iran)\*; Chona F Patalen (Food and Nutrition Research Institute, Philippines)\*; Nikhil D Patel (Jivandeep Hospital, India)\*; Raimund Pechlaner (Medical University of Innsbruck, Austria)\*; Ivan Pećin (University Hospital Centre Zagreb, Croatia)\*;

João M Pedro (Centro de Investigação em Saúde de Angola, Angola)\*; Sergio Viana Peixoto (Fundação Oswaldo Cruz, Brazil)\*; Markku Peltonen (Finnish Institute for Health and Welfare, Finland)\*; Alexandre C Pereira (University of São Paulo, Brazil)\*; Thaliane Mayara Pessoa dos Prazeres (Universidade Federal de Pernambuco, Brazil)\*; Niloofar Peykari (Ministry of Health and Medical Education, Iran)\*; Modou Cheyassin Phall (Gambia National Nutrition Agency, The Gambia)\*; Son Thai Pham (Vietnam National Heart Institute, Vietnam)\*; Rafael N Pichardo (Clínica de Medicina Avanzada Dr. Abel González, Dominican Republic)\*; Iris Pigeot (Leibniz Institute for Prevention Research and Epidemiology - BIPS, Germany)\*; Hynek Pikhart (University College London, UK)\*; Aida Pilav (University of Sarajevo, Bosnia and Herzegovina)\*; Pavel Piler (Masaryk University, Czechia)\*; Freda Pitakaka (Ministry of Health and Medical Services, Solomon Islands)\*; Aleksandra Piwonska (National Institute of Cardiology, Poland)\*; Andreia N Pizarro (University of Porto, Portugal)\*; Pedro Plans-Rubió (College of Physicians of Barcelona, Spain)\*; Silvia Plata (Observatorio de Salud Pública de Santander, Colombia)\*; Barry M Popkin (University of North Carolina at Chapel Hill, USA)\*; Miquel Porta (CIBERESP, Spain; Hospital del Mar Research Institute, Spain)\*; Anil Poudyal (Nepal Health Research Council, Nepal)\*; Farhad Pourfarzi (Ardabil University of Medical Sciences, Iran)\*; Akram Pourshams (Tehran University of Medical Sciences, Iran)\*; Hossein Poustchi (Tehran University of Medical Sciences, Iran)\*; Dorairaj Prabhakaran (Public Health Foundation of India, India)\*; Rajendra Pradeepa (Madras Diabetes Research Foundation, India)\*; Alison J Price (London School of Hygiene & Tropical Medicine, UK)\*; Jacqueline F Price (University of Edinburgh, UK)\*; Rui Providencia (University College London, UK)\*; Jardena J Puder (Lausanne University Hospital, Switzerland)\*; Soile Puhakka (Oulu Deaconess Institute Foundation, Finland)\*; Margus Punab (Tartu University Clinics, Estonia)\*; Qing Qiao (Boehringer Ingelheim, Germany)\*; Mostafa Qorbani (Alborz University of Medical Sciences, Iran)\*; Hedley K Quintana (Gorgas Memorial Institute for Studies of Health, Panama)\*; Tran Quoc Bao (Ministry of Health, Vietnam)\*; Ricardas Radisauskas (Lithuanian University of Health Sciences, Lithuania)\*; Salar Rahimikazerooni (Shiraz University of Medical Sciences, Iran)\*; Olli Raitakari (University of Turku, Finland)\*; Ambady



Ramachandran (India Diabetes Research Foundation, India)\*; Manuel Ramirez-Zea (Institute of Nutrition of Central America and Panama, Guatemala)\*; Jacqueline Ramke (University of Auckland, New Zealand)\*; Elisabete Ramos (University of Porto, Portugal)\*; Rafel Ramos (Institut Universitari d'Investigació en Atenció Primària Jordi Gol, Spain)\*; Lekhraj Rampal (Universiti Putra Malaysia, Malaysia)\*; Sanjay Rampal (University of Malaya, Malaysia)\*; Sheena E Ramsay (Newcastle University, UK)\*; Daniel A Rangel Reina (Instituto Conmemorativo Gorgas de Estudios de la Salud, Panama)\*; Ravindra P Rannan-Eliya (Institute for Health Policy, Sri Lanka)\*; Mohammad-Mahdi Rashidi (Non-Communicable Diseases Research Center, Iran)\*; Josep Redon (University of Valencia, Spain)\*; Jane DP Renner (University of Santa Cruz do Sul, Brazil)\*; Cézane P Reuter (University of Santa Cruz do Sul, Brazil)\*; Luis Revilla (Universidad San Martín de Porres, Peru)\*; Negar Rezaei (Tehran University of Medical Sciences, Iran)\*; Abbas Rezaianzadeh (Shiraz University of Medical Sciences, Iran)\*; Yeunsook Rho (National Health Insurance Service, Republic of Korea)\*; Fernando Rigo (CS S. Agustín Ibsalut, Spain)\*; Leanne M Riley (World Health Organization, Switzerland)\*; Ulf Risérus (Uppsala University, Sweden)\*; Reina G Roa (Ministerio de Salud, Panama)\*; Louise Robinson (Newcastle University, UK)\*; Wendy E Rodríguez-Anderson (Caja Costarricense de Seguro Social, Costa Rica)\*; Fernando Rodríguez-Artalejo (CIBERESP, Spain; Universidad Autónoma de Madrid, Spain)\*; María del Cristo Rodríguez-Perez (Canarian Health Service, Spain)\*; Laura A Rodríguez-Villamizar (Universidad Industrial de Santander, Colombia)\*; Andrea Y Rodríguez (Ministry of Health and Social Protection, Colombia)\*; Ulla Roggenbuck (University of Duisburg-Essen, Germany)\*; Peter Rohloff (Wuqu' Kawoq, Guatemala)\*; Rosalba Rojas-Martinez (National Institute of Public Health, Mexico)\*; Elisabetta L Romeo (Associazione Calabrese di Epatologia, Italy)\*; Annika Rosengren (University of Gothenburg, Sweden; Sahlgrenska University Hospital, Sweden)\*; Joel GR Roy (Statistics Canada, Canada)\*; Adolfo Rubinstein (Institute for Clinical Effectiveness and Health Policy, Argentina)\*; Maria Ruiz-Castell (Luxembourg Institute of Health, Luxembourg)\*; Paola Russo (National Research Council, Italy)\*; Petra Rust (University of Vienna, Austria)\*; Marcin Rutkowski (Medical University of Gdańsk, Poland)\*;

Charumathi Sabanayagam (Singapore Eye Research Institute, Singapore)\*; Hamideh Sabbaghi (Shahid Beheshti University of Medical Sciences, Iran)\*; Harshpal S Sachdev (Sitaram Bhartia Institute of Science and Research, India)\*; Alireza Sadjadi (Tehran University of Medical Sciences, Iran)\*; Ali Reza Safarpour (Shiraz University of Medical Sciences, Iran)\*; Sare Safi (Shahid Beheshti University of Medical Sciences, Iran)\*; Saeid Safiri (Tabriz University of Medical Sciences, Iran)\*; Mohammad Hossien Saghi (Sabzevar University of Medical Sciences, Iran)\*; Olfa Saidi (University Tunis El Manar, Tunisia)\*; Satoko Sakata (Kyushu University, Japan)\*; Nader Saki (Ahvaz Jundishapur University of Medical Sciences, Iran)\*; Sanja Šalaj (University of Zagreb, Croatia)\*; Benoit Salanave (French Public Health Agency, France)\*; Jukka T Salonen (University of Helsinki, Finland)\*; Massimo Salvetti (University of Brescia, Italy)\*; Jose Sánchez-Abanto (National Institute of Health, Peru)\*; Diana A Santos (Universidade de Lisboa, Portugal)\*; Lèlita C Santos (Coimbra University Hospital Center, Portugal)\*; Maria Paula Santos (University of Porto, Portugal)\*; Rute Santos (University of Porto, Portugal)\*; Tamara R Santos (Universidade Federal de Alagoas, Brazil)\*; Jouko L Saramies (Wellbeing Services County of South Karelia, Finland)\*; Luis B Sardinha (Universidade de Lisboa, Portugal)\*; Nizal Sarrafzadegan (Isfahan Cardiovascular Research Center, Iran)\*; Yoko Sato (Shizuoka Graduate University of Public Health, Japan)\*; Kai-Uwe Saum (German Cancer Research Center, Germany)\*; Stefan Savin (World Health Organization, Switzerland)\*; Norie Sawada (National Cancer Center, Japan)\*; Mariana Sbaraini (Universidade Federal do Rio Grande do Sul, Brazil)\*; Marcia Scazufca (University of São Paulo Clinics Hospital, Brazil)\*; Beatriz D Schaan (Universidade Federal do Rio Grande do Sul, Brazil)\*; Herman Schargrodsky (Hospital Italiano de Buenos Aires, Argentina; deceased)\*; Christa Scheidt-Nave (Robert Koch Institute, Germany)\*; Sabine Schipf (University Medicine Greifswald, Germany)\*; Amand Floriaan Schmidt (University College London, UK; University of Amsterdam, The Netherlands)\*; Börge Schmidt (University of Duisburg-Essen, Germany)\*; Carsten O Schmidt (University Medicine Greifswald, Germany)\*; Peter Schnohr (Copenhagen University Hospital - Bispebjerg and Frederiksberg, Denmark)\*; Catherine Mary Schooling (The University of Hong Kong, China)\*; Ben Schöttker (German

Cancer Research Center, Germany)\*; Sara Schramm (University of Duisburg-Essen, Germany)\*; Sylvain Sebert (University of Oulu, Finland)\*; Moslem Sedaghattalab (Yasuj University of Medical Sciences, Iran)\*; Aye Aye Sein (Ministry of Health and Sports, Myanmar)\*; Abhijit Sen (Center for Oral Health Services and Research Mid-Norway, Norway)\*; Sadaf G Sepanlou (Tehran University of Medical Sciences, Iran)\*; Jennifer Servais (Statistics Canada, Canada)\*; Ronel Sewpaul (Human Sciences Research Council, South Africa)\*; Svetlana Shalnova (National Medical Research Centre for Therapy and Preventive Medicine, Russia)\*; Seyed Morteza Shamshirgaran (Neyshabur University of Medical Sciences, Iran)\*; Coimbatore Subramaniam Shanthirani (Madras Diabetes Research Foundation, India)\*; Maryam Sharafkhah (Tehran University of Medical Sciences, Iran)\*; Sanjib K Sharma (B P Koirala Institute of Health Sciences, Nepal)\*; Almaz Sharman (Academy of Preventive Medicine, Kazakhstan)\*; Jonathan E Shaw (Baker Heart and Diabetes Institute, Australia)\*; Amaneh Shayanrad (Tehran University of Medical Sciences, Iran)\*; Ali Akbar Shayesteh (Ahvaz Jundishapur University of Medical Sciences, Iran)\*; Kenji Shibuya (King's College London, UK)\*; Hana Shimizu-Furusawa (Teikyo University, Japan)\*; Rahman Shiri (Finnish Institute of Occupational Health, Finland)\*; Marat Shoranov (Kazakh National Medical University, Kazakhstan)\*; Namuna Shrestha (Public Health Promotion and Development Organization, Nepal)\*; Khairil Si-Ramlee (Ministry of Health, Brunei)\*; Alfonso Siani (National Research Council, Italy)\*; Mark J Siedner (Africa Health Research Institute, South Africa; University of KwaZulu-Natal, South Africa)\*; Diego Augusto Santos Silva (Universidade Federal de Santa Catarina, Brazil)\*; Xueling Sim (National University of Singapore, Singapore; National University Health System, Singapore)\*; Mary Simon (India Diabetes Research Foundation, India)\*; Judith Simons (St Vincent's Hospital, Australia)\*; Leon A Simons (University of New South Wales, Australia)\*; Michael Sjöström (Karolinska Institutet, Sweden; deceased)\*; Jolanta Slowikowska-Hilczer (Medical University of Lodz, Poland)\*; Przemysław Słusarczyk (International Institute of Molecular and Cell Biology, Poland)\*; Liam Smeeth (London School of Hygiene & Tropical Medicine, UK)\*; Eugène Sobngwi (University of Yaoundé 1, Cameroon)\*; Stefan Söderberg (Umeå University, Sweden)\*; Agustinus

Soemantri (Diponegoro University, Indonesia; deceased)\*; Vincenzo Solfrizzi (University of Bari Aldo Moro, Italy)\*; Mohammad Hossein Somi (Tabriz University of Medical Sciences, Iran)\*; Aïcha Soumaré (University of Bordeaux, France)\*; Alfonso Sousa-Poza (University of Hohenheim, Germany)\*; Mafalda Sousa-Uva (National Institute of Health Doutor Ricardo Jorge, Portugal)\*; Karen Sparrenberger (Universidade Federal do Rio Grande do Sul, Brazil)\*; Jan A Staessen (KU Leuven, Belgium)\*; Andreas Stang (University of Duisburg-Essen, Germany)\*; Bill Stavreski (Heart Foundation, Australia)\*; Jostein Steene-Johannessen (Norwegian School of Sport Sciences, Norway)\*; Peter Stehle (Bonn University, Germany)\*; Aryeh D Stein (Emory University, USA)\*; Jochanan Stessman (Hadassah University Medical Center, Israel)\*; Jakub Stokwiszewski (National Institute of Public Health NIH – National Research Institute, Poland)\*; Karien Stronks (University of Amsterdam, The Netherlands)\*; Milton F Suarez-Ortegón (Pontificia Universidad Javeriana Seccional Cali, Colombia)\*; Phalakorn Suebsamran (Ubon Ratchathani University, Thailand)\*; Machi Suka (The Jikei University School of Medicine, Japan)\*; Chien-An Sun (Fu Jen Catholic University, Taiwan)\*; Jianping Sun (Qingdao Municipal Health Admission, China)\*; Johan Sundström (Uppsala University, Sweden)\*; Paibul Suriyawongpaisal (Mahidol University, Thailand)\*; René Charles Sylva (National Statistical Office, Cabo Verde)\*; E Shyong Tai (National University of Singapore, Singapore; National University Health System, Singapore)\*; Furusawa Takuro (Kyoto University, Japan)\*; Abdonas Tamosiunas (Lithuanian University of Health Sciences, Lithuania)\*; Eng Joo Tan (Monash University, Australia)\*; Baimakhan Tanabayev (South Kazakhstan Medical Academy, Kazakhstan)\*; Nikhil Tandon (All India Institute of Medical Sciences, India)\*; Mohammed Rasoul Tarawneh (Ministry of Health, Jordan)\*; Carolina B Tarqui-Mamani (National Institute of Health, Peru)\*; Anne Taylor (University of Adelaide, Australia)\*; Tania Tello (Universidad Peruana Cayetano Heredia, Peru)\*; Yih Chung Tham (National University of Singapore, Singapore)\*; KR Thankappan (Amrita Institute of Medical Sciences, India)\*; Holger Theobald (Karolinska Institutet, Sweden)\*; Xenophon Theodoridis (Aristotle University of Thessaloniki, Greece)\*; Nihal Thomas (Christian Medical College Vellore, India)\*; Amanda G Thrift (Monash University, Australia)\*; Erik J Timmermans

(University Medical Center Utrecht, The Netherlands)\*; Hanna K Tolonen (Finnish Institute for Health and Welfare, Finland)\*; Janne S Tolstrup (University of Southern Denmark, Denmark)\*; Maciej Tomaszewski (University of Manchester, UK)\*; Murat Topbas (Karadeniz Technical University, Türkiye)\*; Michael J Tornaritis (Research and Education Institute of Child Health, Cyprus)\*; Maties Torrent (IB-SALUT Area de Salut de Menorca, Spain)\*; Laura Torres-Collado (CIBERESP, Spain; Universidad Miguel Hernández de Elche, Spain)\*; Giota Touloumi (National and Kapodistrian University of Athens, Greece)\*; Pierre Traissac (French National Research Institute for Sustainable Development, France)\*; Areti Triantafyllou (Aristotle University of Thessaloniki, Greece)\*; Oanh TH Trinh (University of Medicine and Pharmacy at Ho Chi Minh City, Vietnam)\*; Yu-Hsiang Tsao (Institute of Epidemiology and Preventive Medicine, Taiwan)\*; Thomas Tsiampalis (Harokopio University in Athens, Greece)\*; Shoichiro Tsugane (National Institutes of Biomedical Innovation, Health and Nutrition, Japan)\*; John Tuitele (Tafuna Family Health Center, American Samoa; LBJ Hospital, American Samoa)\*; Azaliia M Tuliakova (Ufa Eye Research Institute, Russia)\*; Marshall K Tulloch-Reid (The University of the West Indies, Jamaica)\*; Tomi-Pekka Tuomainen (University of Eastern Finland, Finland)\*; Maria L Turley (Ministry of Health, New Zealand)\*; Evangelia Tzala (Imperial College London, UK)\*; Christophe Tzourio (University of Bordeaux, France)\*; Peter Ueda (Karolinska Institutet, Sweden)\*; Eunice Ugel (Universidad Centro-Occidental Lisandro Alvarado, Venezuela)\*; Flora AM Ukoli (Meharry Medical College, USA)\*; Hanno Ulmer (Medical University of Innsbruck, Austria)\*; Hannu MT Uusitalo (University of Tampere Tays Eye Center, Finland)\*; Gonzalo Valdivia (Pontificia Universidad Católica de Chile, Chile)\*; Damaskini Valvi (Icahn School of Medicine at Mount Sinai, USA)\*; Rob M van Dam (George Washington University, USA)\*; Bert-Jan van den Born (University of Amsterdam, The Netherlands)\*; Johan Van der Heyden (Sciensano, Belgium)\*; Hoang Van Minh (Hanoi University of Public Health, Vietnam)\*; Lenie van Rossem (University Medical Center Utrecht, The Netherlands)\*; Natasja M Van Schoor (Vrije Universiteit Amsterdam, The Netherlands)\*; Irene GM van Valkengoed (University of Amsterdam, The Netherlands)\*; Dirk Vanderschueren (KU Leuven, Belgium)\*; Diego Vanuzzo (MONICA FRIULI Study Group,

Italy)\*; Anette Varbo (Copenhagen University Hospital - Herlev and Gentofte, Denmark; University of Copenhagen, Denmark)\*; Senthil K Vasan (University of Southampton, UK)\*; Tomas Vega (Consejería de Sanidad Junta de Castilla y León, Spain)\*; Toomas Veidebaum (National Institute for Health Development, Estonia)\*; Gustavo Velasquez-Melendez (Universidade Federal de Minas Gerais, Brazil)\*; Charlotte Verdot (The National Public Health Agency, France)\*; Giovanni Veronesi (University of Insubria, Italy)\*; Roosmarijn Verstraeten (Institute of Tropical Medicine, Belgium)\*; Cesar G Victora (Universidade Federal de Pelotas, Brazil)\*; Lucie Viet (National Institute for Public Health and the Environment, The Netherlands)\*; Luis Villarroel (Pontificia Universidad Católica de Chile, Chile)\*; Jesus Vioque (CIBERESP, Spain; Universidad Miguel Hernández de Elche, Spain)\*; Jyrki K Virtanen (University of Eastern Finland, Finland)\*; Bharathi Viswanathan (Ministry of Health, Seychelles)\*; Peter Vollenweider (Lausanne University Hospital, Switzerland; University of Lausanne, Switzerland)\*; Ari Voutilainen (University of Eastern Finland, Finland)\*; Martine Vrijheid (CIBERESP, Spain; Barcelona Institute for Global Health, Spain)\*; Alisha N Wade (University of the Witwatersrand, South Africa)\*; Janette Walton (Munster Technological University, Ireland)\*; Wan Mohamad Wan Bebakar (Universiti Sains Malaysia, Malaysia)\*; Wan Nazaimoon Wan Mohamud (Institute for Medical Research, Malaysia)\*; Chongjian Wang (Zhengzhou University, China)\*; Huijun Wang (Chinese Center for Disease Control and Prevention, China)\*; Ningli Wang (Capital Medical University Beijing Tongren Hospital, China)\*; Qian Wang (Xinjiang Medical University, China)\*; Weiqing Wang (Shanghai Jiao-Tong University School of Medicine, China)\*; Ya Xing Wang (Capital Medical University, China)\*; Yi-Ren Wang (Ministry of Health and Welfare, Taiwan)\*; Ying-Wei Wang (Ministry of Health and Welfare, Taiwan)\*; S Goya Wannamethee (University College London, UK)\*; Karen Webster-Kerr (The Ministry of Health and Wellness, Jamaica)\*; Niels Wedderkopp (University of Southern Denmark, Denmark)\*; Wenbin Wei (Capital Medical University, China)\*; Leo D Westbury (University of Southampton, UK)\*; Peter H Whincup (St George's, University of London, UK)\*; Kurt Widhalm (Medical University of Vienna, Austria)\*; Indah S Widyahening (Universitas Indonesia, Indonesia)\*; Andrzej Więcek (Medical University of

Silesia, Poland)\*; Nilmini Wijemunige (Institute for Health Policy, Sri Lanka)\*; Rainford J Wilks (The University of the West Indies, Jamaica)\*; Karin Willeit (Medical University of Innsbruck, Austria)\*; Peter Willeit (Medical University of Innsbruck, Austria)\*; Tom Wilsgaard (UiT The Arctic University of Norway, Norway)\*; Bogdan Wojtyniak (National Institute of Public Health NIH – National Research Institute, Poland)\*; Roy A Wong-McClure (Caja Costarricense de Seguro Social, Costa Rica)\*; Andrew Wong (University College London, UK)\*; Emily B Wong (Africa Health Research Institute, South Africa)\*; Mark Woodward (University of New South Wales, Australia; Imperial College London, UK)\*; Chao-Chun Wu (Ministry of Health and Welfare, Taiwan)\*; Frederick C Wu (University of Manchester, UK)\*; Haiquan Xu (Institute of Food and Nutrition Development of Ministry of Agriculture and Rural Affairs, China)\*; Liang Xu (Beijing Institute of Ophthalmology, China)\*; Yu Xu (Shanghai Jiao-Tong University School of Medicine, China)\*; Nor Azwany Yaacob (Universiti Sains Malaysia, Malaysia)\*; Li Yan (Imperial College London, UK)\*; Weili Yan (Children’s Hospital of Fudan University, China)\*; Tabara Yasuharu (Shizuoka Graduate University of Public Health, Japan)\*; Chao-Yu Yeh (Ministry of Health and Welfare, Taiwan)\*; Moein Yoosefi (Non-Communicable Diseases Research Center, Iran)\*; Akihiro Yoshihara (Niigata University, Japan)\*; San-Lin You (Fu Jen Catholic University, Taiwan)\*; Novie O Younger-Coleman (The University of the West Indies, Jamaica)\*; Yu-Ling Yu (KU Leuven, Belgium)\*; Ahmad Faudzi Yusoff (Ministry of Health, Malaysia)\*; Ahmad A Zainuddin (Ministry of Health, Malaysia)\*; Farhad Zamani (Iran University of Medical Sciences, Iran)\*; Sabina Zambon (University of Padua, Italy)\*; Antonis Zampelas (Agricultural University of Athens, Greece)\*; Abdul Hamid Zargar (Center for Diabetes and Endocrine Care, India)\*; Ko Ko Zaw (University of Public Health, Myanmar)\*; Tomasz Zdrojewski (Medical University of Gdańsk, Poland)\*; Tajana Zeljkovic Vrkic (University Hospital Centre Zagreb, Croatia)\*; Yi Zeng (Peking University, China; Duke University, USA)\*; Bing Zhang (Chinese Center for Disease Control and Prevention, China)\*; Lei Zhang (Qingdao Endocrine and Diabetes Hospital, China)\*; Luxia Zhang (Peking University First Hospital, China)\*; Zhen-Yu Zhang (KU Leuven, Belgium)\*; Ming-Hui Zhao (Peking University First Hospital, China)\*; Wenhua Zhao (Chinese Center for Disease Control

and Prevention, China)\*; Bekbolat Zholdin (West Kazakhstan Medical University, Kazakhstan)\*; Paul Zimmet (Monash University, Australia)\*; Marie Zins (Institut National de la Santé et de la Recherche Médicale, France; Paris Cité University, France)\*; Emanuel Zitt (Agency for Preventive and Social Medicine, Austria)\*; Nada Zoghلامي (National Institute of Public Health, Tunisia)\*; Julio Zuñiga Cisneros (Instituto Conmemorativo Gorgas de Estudios de la Salud, Panama)\*



## **Appendix Text 2. Data sources**

### *Data access*

We used data from a population-based database on cardiometabolic risk factors collated by the Non-Communicable Disease Risk Factor Collaboration (NCD-RisC), as detailed previously.<sup>1,2</sup> Data were obtained from publicly available multi-country and national measurement surveys (e.g., WHO STEPwise approach to Surveillance (STEPS) surveys, and those identified via the Inter-University Consortium for Political and Social Research, UK Data Service, and European Health Interview & Health Examination Surveys Database). With the collaboration of the WHO and its regional and country offices, we identified and accessed population-based survey data from national health and statistical agencies. We searched and reviewed published studies as detailed previously,<sup>1</sup> and invited eligible studies to join NCD-RisC, as we did with data holders from earlier pooled analyses of cardiometabolic risk factors.<sup>3-6</sup> The NCD-RisC database is continuously updated through all the above routes as well as through periodic requests to NCD-RisC members to suggest additional sources in their countries.

### *Data inclusion criteria and characteristics of included studies*

We carefully checked that each data source met our inclusion criteria, described below. All NCD-RisC members were also periodically asked to review the list of sources from their country, to verify that they met the inclusion criteria and were not duplicates. Potential duplicate data sources were first identified by comparing studies from the same country and year, followed by checking with NCD-RisC members who had provided data whether sources from the same country and year, and with similar sample sizes and age ranges, were the same or distinct. If two sources were confirmed as duplicates, one was discarded.

For each data source, we recorded the study population, the sampling approach, the years of measurement and the measurement methods. Only population-based data were included. All data were assessed and classified by whether they covered the whole country, one or more

subnational regions (i.e., one or more provinces or states, more than three cities, or more than five rural communities), or one or a small number of communities (limited geographical scope not meeting above national or subnational criteria). As stated in statistical methods, these study-level attributes were used in the Bayesian hierarchical meta-regression model so that all available data were used, while taking into account the aforementioned differences in the populations from which different studies had sampled. We recorded whether FPG and HbA1c were measured in a laboratory or using a point-of-care portable device. For studies with laboratory measurement, we recorded whether plasma or whole blood was used. For studies that used portable devices, we verified using the device manual, discussion the study investigators, and if relevant the manufacturers, whether the device reported glucose values in whole blood or whether it converted to plasma-equivalent internally, with those reporting glucose in whole blood converted to plasma equivalent as described below. This information was used so that the calculated prevalence for each survey was correctly and consistently calculated using plasma-equivalent glucose. All submitted data were checked by at least two persons independently. Questions and clarifications were discussed with NCD-RisC members and resolved before data were incorporated into the database.

Data were included if the following criteria were met: measured data on FPG and/or HbA1c were available; study participants were 18 years of age and older; data were from population samples at the national, subnational, or community level; and data were from the countries listed in Appendix Table 2.

We excluded all data sources that were solely based on self-reported diagnosis of diabetes or a registry of people with diagnosed diabetes because a substantial proportion of people with diabetes remain undiagnosed, especially in low- and middle-income countries.<sup>7,8</sup> We excluded data sources on population subgroups whose glycaemic levels may be systematically high or low, including studies that had included or excluded participants based on health status; studies whose participants were only from specific educational, occupational,

socioeconomic or ethnic subgroups. We also excluded studies that recruited through health facilities; the exceptions to this exclusion were studies whose sampling frame was health insurance schemes that are not segregated by occupation or socioeconomic status in countries where at least 80% of the population were insured, and studies based on primary care system in high-income and central European countries with universal insurance, as contact with the primary care systems in these countries tends to be as good as or better than response rates for population-based surveys.

We excluded FPG data from studies that had not instructed participants to fast for at least 6 hours before FPG measurement. We excluded FPG or HbA1c data in studies that measured these biomarkers only among participants with previously-diagnosed diabetes or those with high casual glucose levels. We excluded HbA1c data from studies whose decision to measure HbA1c depended on participants' FPG or casual glucose levels, and vice versa. We also excluded HbA1c data from studies whose mid-year was before 2000, before HbA1c assays were standardised.<sup>9</sup> When FPG and/or HbA1c data were missing for more than 10% of participants in a survey, we contacted the data providers and checked the study design documentation to verify that missingness was not based on pre-selected criteria and hence likely at random.

In addition to the studies in the NCD-RisC database, summary statistics such as diabetes prevalence, mean FPG and mean HbA1c for nationally representative studies that could not be accessed via the above routes were extracted from published reports. We also included such summaries from a previous global data pooling study,<sup>4</sup> when individual record data could not be accessed through the above routes, for example because the authors had retired or moved, data had been permanently archived, or data were stored using older storage technologies that could not be easily retrieved.

### *Data cleaning and management*

In surveys with data on treatment, we determined whether a person was taking medication for diabetes using survey-specific questions worded as variations of “are you currently taking medication for diabetes or high blood sugar?”; or the combination of “do you currently inject/use insulin for diabetes?” and “are you currently taking any medicines, tablets, or pills for diabetes?”; or using information gathered on types of medicines used by the participant. Fifteen studies (1%) had only collected data on the use of oral hypoglycaemic drugs, but not insulin. For these studies, we used medication data for participants aged 40 years and older, but not for younger participants. We did this because data from studies that had information on both types of treatment showed that using insulin alone was more common for those in younger ages.

We excluded women who were pregnant at the time of examination. We excluded 32,498 participants (<0.1% of all participants) with FPG <2.0 mmol/L or >30.0 mmol/L, or HbA1c <3% or >18%, because these values are likely to reflect measurement or data recording errors. We excluded 254,954 participants with missing medication information (0.2% of all participants); those with and without medication information were similar in their age and BMI (differences of 0.6 years and 0.1 kg/m<sup>2</sup>, respectively). In 74 studies (7%), fasting glucose was reported in capillary whole blood. We converted these measurements to plasma-equivalent values using a linear regression equation that quantified the relationship between the two in studies that had measured both whole-blood-based and plasma-based fasting glucose.<sup>10</sup>

Anonymised individual data from the studies in the NCD-RisC database were reanalysed according to a common protocol. We calculated diabetes prevalence and treatment, as defined in the primary outcomes, by sex and age group for each study. When applicable, we used survey sample weights and accounted for complex survey design in calculating summary statistics.

Some studies had asked questions about diabetes treatment from all participants but measured FPG and HbA1c in a subset of participants by design. The reasons for this practice include the different response rates for questionnaire and laboratory parts of a survey, cost of equipment or laboratory analysis, or the logistics of blood collection including fasting requirement for FPG. For example, the US National Health and Nutrition Examination Surveys (NHANES) divided participants into those who visited the data collection sites in the morning or afternoon; only the morning group was instructed to fast and had FPG data. The ICMR-INDIAB surveys in India measured HbA1c for every fifth of participants who did not have a prior diagnosis of diabetes. Both surveys collected data on diabetes medication from all participants.<sup>11,12</sup> In these studies, untreated diabetes was only calculated among those with biomarker measurement (see also Appendix Text 3).

Some studies in our analysis had data on both FPG and HbA1c; others had only one of these biomarkers (Appendix Table 1). In studies with data on both FPG and HbA1c, untreated diabetes was calculated using both biomarkers, i.e. participants with either FPG  $\geq 7.0$  mmol/L or HbA1c  $\geq 6.5\%$ . In studies with data on one biomarker only, participants whose measured biomarker was elevated (i.e., FPG  $\geq 7.0$  mmol/L in studies that had measured FPG; HbA1c  $\geq 6.5\%$  in studies that had measured HbA1c) were considered to have diabetes. For the remainder of the sample, who neither used treatment nor had elevated level of the measured biomarker, we used the coefficients of previously-validated regressions<sup>8</sup> to estimate the probability of having elevated level of the second (unmeasured) biomarker. These regressions were developed and validated using data from studies that had measured both FPG and HbA1c.<sup>8</sup> The model was specified as a logistic regression, and the predictors included the measured biomarker, age, sex, body-mass index, and region.<sup>8</sup> For example, in a study that measured only FPG, those who used treatment or had FPG  $\geq 7.0$  mmol/L were considered to have diabetes; for those who did not use treatment and whose FPG was  $< 7.0$  mmol/L, we estimated the probability of having HbA1c  $\geq 6.5\%$  using the coefficients of the aforementioned regression. The probabilities were then summed across individuals to obtain the equivalent

number of people with isolated elevated HbA1c, which was then added to the numerator of prevalence.

Some studies reported diabetes prevalence based on a different definition from the primary definition, e.g., one study used FPG  $\geq 7.8$  mmol/L and another used HbA1c  $\geq 10\%$ , or reported mean FPG. Many of these were from a previous global pooling study<sup>4</sup> or extracted from published reports and papers as stated earlier, hence reanalysis of their data was not feasible. This group also included studies with individual participant data that had not collected data on treatment and hence could be used to calculate mean FPG, mean HbA1c or prevalence of people with elevated levels of these markers, but not treated diabetes. We used regressions that converted data from these sources to our primary outcome for diabetes prevalence. The dependent variable in each of these regressions was the primary outcome for diabetes prevalence (prevalence of FPG  $\geq 7.0$  mmol/L, HbA1c  $\geq 6.5\%$ , or taking medication for diabetes), and the independent variable was a mean (e.g., mean FPG) or prevalence with a definition that differed from the primary outcome. The coefficients of these regressions were estimated from data sources which could be used to calculate both dependent and independent variables. Details of conversion regressions, and their specification, coefficients and performance, are reported at <https://github.com/NCD-RisC/ncdrisc-methods/blob/main/NCD-RisC-conversion-model-for-diabetes-prevalence.pdf>.

### **Appendix Text 3. Statistical methods**

#### *Overview*

We used a Bayesian hierarchical meta-regression model, fitted using a Markov chain Monte Carlo (MCMC) sampler, with inference made using posterior MCMC samples, to estimate trends in diabetes prevalence and treatment, by sex, age, country, and year. As stated in the main paper, we report trends from 1990 to 2022, a period during which diabetes was recognised as an epidemic and the benefits of treatment were demonstrated in clinical trials.<sup>13,14</sup> Data from 1980 to 1989 were used in the model so that the estimates for 1990 and the subsequent years were informed by as many studies from the early period and from each country as possible. We modelled the two primary outcomes, diabetes prevalence and treatment, separately because their time trends and age associations may be different.

The statistical methods, including its implementation and computation, are detailed in a statistical paper<sup>15</sup> and related substantive papers.<sup>2,16</sup> Model specification is summarised below and further described using statistical notation. This is followed with details of model implementation and computation.

In summary, we organised countries into 20 regions, based on geography and other shared national characteristics, which were further grouped into eight super-regions (Appendix Table 2). The model had a hierarchical structure in which estimates for each country and year were informed by its own data, if available, and by data from other years in the same country and from other countries, especially those in the same region and super-region with data for similar time periods. The extent to which estimates for each country-year were influenced by data from other years and other countries depended on whether the country had data, the sample size of data, whether the available studies were at national, subnational or community level, and the within-country and within-region variability of the available data. Estimates for countries with more national studies, especially with data that were less variable, were informed to a greater degree by its own data than those with fewer studies, especially fewer

national studies, or those with data that varied extensively. At the extreme, for the 25 countries without data, the estimates were informed by data from other countries, especially those in the same region with data for similar time periods, and had larger uncertainty.

The model incorporated non-linear time trends as a combination of linear and second-order random walk terms. Both components were modelled hierarchically. The age association of diabetes was modelled using a cubic spline to allow non-linear age patterns, which might vary across countries. The coefficients of the splines were modelled hierarchically, and the coefficients are allowed to vary over time to reflect changing time trends in diabetes prevalence and treatment across ages, if supported by data.<sup>2,16</sup>

The model accounted for the possibility that diabetes prevalence and treatment in subnational and community studies might systematically differ from, and have larger variation than, nationally representative samples through the inclusion of fixed-effect and random-effect terms. The fixed effects allowed for systematic differences between subnational or community studies and national studies and allowed for these differences to vary over time. The random effects allowed national data to have a larger influence on the estimates than subnational or community data with similar sample sizes. The model also accounted for urban-rural differences in diabetes prevalence and treatment through fixed effect terms for urban-only and rural-only studies, so that our estimates were for the entire population of each country. These urban and rural effects were weighted by the difference between study-level and country-level urbanisation (i.e., proportion of population living in urban areas) in the year when the study was conducted and were also permitted to vary over time.

As stated in the Methods section of the main paper, we analysed diabetes prevalence for people aged 18+ years and treatment for people aged 30+ years. We performed all analyses separately by sex, because levels and trends in diabetes prevalence and treatment may be different by sex.<sup>1</sup>



### *Detailed model specification*

As explained in *Overview*, we modelled the two primary outcomes separately. Here we describe the model in detail for diabetes prevalence. The model for diabetes treatment is described in the section *Model specification for treatment coverage*.

For diabetes prevalence, we used a latent variable  $\alpha_{h,i} = \Phi^{-1}(\text{prevalence}_{h,i})$  which is the probit-transformed diabetes prevalence ( $\text{prevalence}_{h,i}$ ) for age group  $h$  of study  $i$ .  $\Phi$  is the cumulative distribution function of the standard normal distribution and referred to as probit transformation. This specification constrains the primary outcome to be between 0 and 1. We modelled  $\alpha_{h,i}$  with a Gaussian distribution

$$\alpha_{h,i} \sim N(a_{j[i]} + b_{j[i]}t[i] + u_{j[i],t[i]} + \gamma_{j[i],t[i]}(z_h) + \mathbf{X}_i\boldsymbol{\beta} + e_i, \tau^2 + v_{h,i}^2), \quad (1)$$

where  $j$ , the country in which a study was carried out, and  $t$ , the study year, are uniquely determined by the study index  $i$ ; we denote this determination of  $j$  and  $t$  on  $i$  by  $j[i]$  and  $t[i]$  respectively. The country-specific intercept and linear time slope from country  $j$  are denoted  $a_j$  and  $b_j$  respectively, with  $j \in \{1, \dots, J\}$ , where  $J = 200$  is the number of countries in our analysis. We describe the hierarchical model used for the linear component of country time trends,  $a$ 's and  $b$ 's, in the section *Linear component of country time trends*.  $u_{j,t}$  captures smooth non-linear change over time in country  $j$ , as described in the section *Nonlinear change*.  $\gamma_{j,t}(z_h)$  is the age effect for age group  $h$  (with mid-age  $z_h$ ) in year  $t$  in country  $j$ ; it is described in detail in the section *Age model*. The matrix  $\mathbf{X}$  contains terms describing whether studies were representative at the national, subnational or community level, and whether they were urban-only, rural-only, or covered both urban and rural populations, and  $\boldsymbol{\beta}$  contains the associated fixed effects. In addition, a random effect  $e_i$  is estimated for each study  $i$ . These study-specific terms are described in the section *Study-level terms and study-specific random effects*. The variance term  $v_{h,i}^2$  in the model accounts for the uncertainty arising from using regression models to estimate diabetes prevalence based on the primary definition. The variance term

$\tau^2$  captures the variability not accounted for by the study-specific random effects. These are described in the section *Additional age-by-study variability*. Details on model fitting and convergence are given in the section *Model implementation*. Finally, details on how country-level inference was performed are given in the section *Model inference and post-processing*.

The studies used to fit the model provided data on the number (and hence prevalence) of people with diabetes in a sample. Each study contributed up to 13 data points for each sex, with the exact number depending on the age groups represented in the study. If a study collected data on glycaemic markers like FPG or HbA1c and diabetes medication information for all participants, then the number of people with diabetes  $y_{h,i}$ , from age group  $h$  of study  $i$ , is assumed to be an observation taken from a binomial distribution with sample size  $n_{h,i}$  and prevalence  $prevalence_{h,i}$ ,

$$y_{h,i} \sim \text{Bin}(n_{h,i}, prevalence_{h,i}), \quad (2)$$

with  $prevalence_{h,i}$  linking to the latent variable  $\alpha_{h,i}$  modelled in equation (1).

As stated in Appendix Text 2, some studies collected data on diabetes medication in all participants but measured glycaemic markers only in a subset of participants. This approach to data collection means that the prevalence of treated diabetes was based on the entire sample, whereas untreated diabetes (i.e., people who were not treated but had elevated levels of FPG or HbA1c) was based on the subset with biomarker data, with the two groups having different sample sizes.

With such survey design, the number of participants with diabetes is the sum of two separately observed quantities: treated diabetes ( $y_{h,i}^{treated}$ ) and untreated diabetes ( $y_{h,i}^{untreated}$ ), obtained from their own respective samples. Each is assumed to be an observation taken from a binomial distribution:

$$y_{h,i}^{treated} \sim \text{Bin}(n_{h,i}^{treated}, prevalence_{h,i}^{treated}), \quad (3)$$

$$y_{h,i}^{untreated} \sim Bin(n_{h,i}^{untreated}, proportion_{h,i}^{untreated}), \quad (4)$$

where  $prevalence_{h,i}^{treated}$  is the prevalence of treated diabetes,  $proportion_{h,i}^{untreated}$  is the proportion of participants who do not use treatment with FPG  $\geq 7.0$  mmol/L or HbA1c  $\geq 6.5\%$ . Their respective sample sizes are  $n_{h,i}^{treated}$ , the number of participants with data on diabetes medication, and  $n_{h,i}^{untreated}$ , the number of untreated participants who had data on glycaemic markers. Prevalence of total diabetes can then be calculated as follows:

$$p_{h,i} = prevalence_{h,i}^{treated} + (1 - prevalence_{h,i}^{treated}) \times proportion_{h,i}^{untreated}. \quad (5)$$

833 (75%) studies (referred to as group A hereafter) had data available for treated and untreated diabetes. Data from all group A studies were used in equations (3) and (4) in the model, to allow for the aforementioned potentially different sample sizes for treated and untreated diabetes. The remaining 275 (25%) studies (group B) had data for prevalence of total diabetes, but not for treated versus untreated diabetes. Data from group B studies were used in equation (2) in the model.

In equation (3), we used the number of participants who answered the questionnaire about medication use as sample size for treated diabetes ( $n_{h,i}^{treated}$ ), and in equation (4) we used those participants who had answered “no” to this question and had a biomarker measurement as sample size for untreated diabetes ( $n_{h,i}^{untreated}$ ). In studies with complex survey design, effective sample size is smaller than actual sample size because sampling is done in clusters and/or with stratification. We used actual sample size and did not use effective sample size, which was used in previous analyses,<sup>17</sup> because there is no standard way to calculate effective sample size for the untreated group in equation (4), itself because the untreated group relies on data from a subset of participants (those without treatment and with biomarker measurement).

We used an additional latent variable in calculating  $prevalence_{h,i}^{treated}$  and  $proportion_{h,i}^{untreated}$ , namely the probit-transformed treatment coverage  $\zeta_{h,i} = \Phi^{-1}(treatment_{h,i})$  where  $treatment_{h,i}$  is treatment coverage, our second primary outcome, for age group  $h$  of study  $i$ . This latent variable allows us to consistently model both of our primary outcomes (prevalence and treatment) as stated in the section *Model specification for treatment coverage*.  $treatment_{h,i}$  has the following relationship with prevalence of diabetes and treated diabetes:

$$prevalence_{h,i}^{treated} = prevalence_{h,i} \times treatment_{h,i}. \quad (6)$$

All prevalence terms can be expressed using the two latent variables  $\alpha_{h,i}$  and  $\zeta_{h,i}$ :

$$prevalence_{h,i} = \Phi(\alpha_{h,i}), \quad (7)$$

$$prevalence_{h,i}^{treated} = \Phi(\alpha_{h,i}) \Phi(\zeta_{h,i}), \quad (8)$$

$$proportion_{h,i}^{untreated} = \frac{\Phi(\alpha_{h,i}) - \Phi(\alpha_{h,i}) \Phi(\zeta_{h,i})}{1 - \Phi(\alpha_{h,i}) \Phi(\zeta_{h,i})}. \quad (9)$$

In the model for diabetes prevalence, we modelled the latent variable  $\alpha_{h,i}$  as described in equation (1) and detailed in the following sections, and we used a normal prior  $\mathcal{N}(0,1)$  for the latent variable  $\zeta_{h,i}$  which is equivalent to an uninformative uniform distribution on  $[0, 1]$  in the prevalence scale.

#### *Linear component of country time trends*

The model had a hierarchical structure, whereby studies were nested in countries, which were nested in regions (indexed by  $l$ ), which were nested in super-regions (indexed by  $m$ ), which were all nested in the globe (see Appendix Table 2 for a list of countries and territories in each region, and regions in each super-region). This structure allowed the model to share information across units to a greater degree when data were non-existent or weakly

informative (for example, had a small sample size or were not nationally representative) and, to a lesser extent, in data-rich countries and regions.<sup>18</sup>

The  $a$  and  $b$  terms are country-specific linear intercepts and time slopes with terms at each level of the hierarchy, denoted by the superscripts  $c$ ,  $r$ ,  $s$  and  $g$ , respectively:

$$a_j = a_j^c + a_{l[j]}^r + a_{m[j]}^s + a^g, \quad (10)$$

$$b_j = b_j^c + b_{l[j]}^r + b_{m[j]}^s + b^g, \quad (11)$$

$$a^x \sim N(0, \kappa_a^x), \quad (12)$$

$$b^x \sim N(0, \kappa_b^x), \quad (13)$$

where  $x \in \{c, r, s\}$ . The  $\kappa$  terms were each assigned a flat prior on the standard deviation scale.<sup>18</sup> We also assigned flat priors to  $a^g$  and  $b^g$ .

### *Nonlinear change*

The prevalence of diabetes may change nonlinearly over time.<sup>1</sup> We captured smooth nonlinear change in time in country  $j$  using the vector  $u_j$ . Just as  $a_j$  and  $b_j$  are each defined as the sum of country, region, super-region and global components, we defined

$$u_j = u_j^c + u_{l[j]}^r + u_{m[j]}^s + u^g. \quad (14)$$

To allow the model to differentiate between the degrees of nonlinearity that exist at the country, region, super-region and global levels, we assigned the four components of each  $u$  a discrete second-order Gaussian autoregressive prior.<sup>19</sup> In particular, the vectors  $u_j^c, j \in \{1, \dots, J\}$ ,  $u_l^r, l \in \{1, \dots, L\}$ ,  $u_m^s, m \in \{1, \dots, M\}$ , and  $u^g$ , all of length  $T$ , are each given a Gaussian prior with mean zero and precision  $\lambda_c P$ ,  $\lambda_r P$ ,  $\lambda_s P$  and  $\lambda_g P$  respectively, where the scaled precision matrix  $P$  in the Gaussian autoregressive prior penalizes first and second differences as follows:

$$\begin{aligned}
P &= \begin{bmatrix} 1 & 0 & 0 & \cdots & 0 \\ -2 & 1 & 0 & \cdots & 0 \\ 1 & -2 & 1 & \cdots & 0 \\ 0 & 1 & -2 & \cdots & 0 \\ 0 & 0 & 1 & \cdots & 0 \\ \vdots & \vdots & \vdots & \ddots & \vdots \\ 0 & 0 & 0 & \cdots & 1 \end{bmatrix} \begin{bmatrix} 1 & -2 & 1 & 0 & 0 & \cdots & 0 \\ 0 & 1 & -2 & 1 & 0 & \cdots & 0 \\ 0 & 0 & 1 & -2 & 1 & \cdots & 0 \\ \vdots & \vdots & \vdots & \vdots & \vdots & \ddots & \vdots \\ 0 & 0 & 0 & 0 & 0 & \cdots & 1 \end{bmatrix} \\
&= \begin{bmatrix} 1 & -2 & 1 & 0 & 0 & \cdots & 0 \\ -2 & 5 & -4 & 1 & 0 & \cdots & 0 \\ 1 & -4 & 6 & -4 & 1 & \cdots & 0 \\ 0 & 1 & -4 & 6 & -4 & \cdots & 0 \\ 0 & 0 & 1 & -4 & 6 & \cdots & 0 \\ \vdots & \vdots & \vdots & \vdots & \vdots & \ddots & \vdots \\ 0 & 0 & 0 & 0 & 0 & \cdots & 1 \end{bmatrix}.
\end{aligned} \tag{15}$$

$P$  is multiplied by the estimated precision parameters  $\lambda_c$ ,  $\lambda_r$ ,  $\lambda_s$ , and  $\lambda_g$ , thus upweighting or downweighting the strength of its penalties and ultimately determining the degree of smoothing at each level. For each of the four precision parameters, we used a truncated flat prior on the standard deviation scale ( $1/\sqrt{\lambda}$ ).<sup>18</sup> We truncated these priors such that  $\log\lambda \leq 20$  for each of the four  $\lambda$ 's. This upper bound is enforced as a computational convenience, whereby models with  $\log\lambda > 20$  are treated as equivalent to a model with  $\log\lambda = 20$ , as they essentially have no extra-linear variability in time. In practice, this upper bound had little effect on the parameter estimates. Furthermore, we ordered the  $\lambda$ 's a priori as follows:  $\lambda_c < \lambda_r < \lambda_s < \lambda_g$ . This prior constraint conveys the expectation that the global trend in the prevalence of diabetes has less extra-linear variability than the trend of any given super-region, which has less than those of constituent regions, which in turn has less variability than the trends of constituent countries.

The matrix  $P$  has rank  $T - 2$ , corresponding to a flat, improper prior on the mean and the slope of the  $u_j^c$ 's, the  $u_l^r$ 's, the  $u_m^s$ 's and  $u^g$ , and is not invertible.<sup>20</sup> Thus, we had a proper prior in a reduced-dimension space,<sup>21</sup> with the prior expressed as follows:

$$P(u_j^c | \lambda_c) \propto \lambda_c^{\frac{T-2}{2}} \exp \left\{ -\frac{\lambda_c}{2} u_j^{c'} P u_j^c \right\}. \quad (16)$$

Note that if  $u_j^c$  had a non-zero mean, this would introduce non-identifiability with respect to  $a_j^c$ . By the same token,  $b_j^c$  would not be identifiable if  $u_j^c$  had a non-zero time slope, and similarly for the other means and slopes. Thus, to achieve identifiability of the  $a$ 's,  $b$ 's, and  $u$ 's, we constrained the mean and slope of  $u^g$  and each of  $u^s$ ,  $u^r$ , and  $u^c$  to be zero. Enforcing orthogonality between the linear and nonlinear portions of the time trends meant that each can be interpreted independently.

For the countries in which there are observations for at least two different time points, this improper prior will not lead to an improper posterior because the data provide information about the mean and slope. In order to enforce the desired orthogonality between the linear and nonlinear portions of the model, we used the Rue and Held correction.<sup>21</sup> For the countries without data (25 for women and 26 for men), we took the Moore-Penrose pseudoinverse of  $P$ ,<sup>22</sup> setting to infinity those eigenvalues that correspond to the non-identifiability. This effectively constrained the non-identified portions of the model to zero, as the corresponding variances are set to zero;<sup>19</sup> in this case the Rue and Held correction<sup>21</sup> is not needed. An intermediate case occurs when data are observed for only one time point in a country. In this case, the full conditional precision has rank  $T - 1$  because the mean but not the linear trend of  $u_j^c$  is identified by the data. We therefore constrained the linear trend of  $u_j^c$  to zero in this case, by taking the generalized inverse of the full conditional precision. We then constrained the mean of  $u_j^c$  to zero using the one-dimensional version of the Rue and Held correction.<sup>21</sup> Computational details are given in the Appendix of a previous paper.<sup>23</sup>

### *Age model*

We sought a smooth function that could characterise gradual changes in diabetes over age, as seen in the data, with parsimonious number of parameters to allow robust estimation. To

achieve this, we modelled age using cubic splines with two knots selected based on epidemiological knowledge about diabetes<sup>24</sup> and statistical considerations.

For age group  $h$  with mid-age  $z_h$ , in study  $i$ , conducted in year  $t$  and country  $j$ , the age term is given by

$$\gamma_{j[i],t[i]}(z_h) = \gamma_{1,i}z_h + \gamma_{2,i}z_h^2 + \gamma_{3,i}z_h^3 + \gamma_{4,i}(z_h - k_1)_+^3 + \gamma_{5,i}(z_h - k_2)_+^3, \quad (17)$$

where the two knots were placed ages  $(k_1, k_2) = (50, 65)$  years. To reduce dependence among model parameters, we centred the age variable at 55 years.

Each of the spline coefficients was allowed to vary across countries and was modelled hierarchically, and was further allowed to vary across time, in order to reflect different trends in prevalence across age groups. We modelled spline coefficients consistently with previous analysis,<sup>2,16</sup> with the  $k^{\text{th}}$  age term coefficients for study  $i$  given as follows:

$$\gamma_{k,i} = \psi_k^g + \psi_{k,j[i]}^c + \psi_{k,l[i]}^r + \psi_{k,m[i]}^s + (\phi_k^g + \phi_{k,j[i]}^c + \phi_{k,l[i]}^r + \phi_{k,m[i]}^s) t[i], \quad (18)$$

$$\psi_{k,j[i]}^c \sim N(0, \sigma_{\psi,k,c}^2), \quad (19)$$

$$\psi_{k,l[i]}^r \sim N(0, \sigma_{\psi,k,r}^2), \quad (20)$$

$$\psi_{k,m[i]}^s \sim N(0, \sigma_{\psi,k,s}^2), \quad (21)$$

$$\phi_{k,j[i]}^c \sim N(0, \sigma_{\phi,k,c}^2), \quad (22)$$

$$\phi_{k,l[i]}^r \sim N(0, \sigma_{\phi,k,r}^2), \quad (23)$$

$$\phi_{k,m[i]}^s \sim N(0, \sigma_{\phi,k,s}^2). \quad (24)$$

Here  $\psi^g$ ,  $\psi^c$ ,  $\psi^r$ , and  $\psi^s$  are global, country, region, and super-region intercepts, and  $\phi^g$ ,  $\phi^c$ ,  $\phi^r$ , and  $\phi^s$  are global, country, region and super-region time slope parameters. A flat improper prior was placed on each of the  $\sigma_{\psi}$ 's and  $\sigma_{\phi}$ 's.

### *Study-level terms and study-specific random effects*



The prevalence of diabetes as measured in individual studies may differ from the true unobserved country-year prevalence due to study implementation factors such as those associated with sampling, participation and response, and measurement. We included time-varying offsets (referred to above as fixed effects) to help account for potential systematic differences associated with data sources that are representative of subnational or community populations, and data sources that are representative of urban-only or rural-only populations, through the terms in  $\mathbf{X}_i\boldsymbol{\beta}$ :

$$\begin{aligned} \mathbf{X}_i\boldsymbol{\beta} = & \beta_1\mathbf{I}\{\mathbf{X}_i^{c.vrg} = \textit{subnational}\} + \beta_2\mathbf{I}\{\mathbf{X}_i^{c.vrg} = \textit{subnational}\}t[i] \\ & + \beta_3\mathbf{I}\{\mathbf{X}_i^{c.vrg} = \textit{community}\} + \beta_4\mathbf{I}\{\mathbf{X}_i^{c.vrg} = \textit{community}\}t[i] \\ & + \beta_5\mathbf{X}_{j[i],t[i]}^{c.urb}\mathbf{I}\{\mathbf{X}_i^{s.urb} = \textit{rural}\} + \beta_6\mathbf{X}_{j[i],t[i]}^{c.urb}\mathbf{I}\{\mathbf{X}_i^{s.urb} = \textit{rural}\}t[i] \\ & + \beta_7(1 - \mathbf{X}_{j[i],t[i]}^{c.urb})\mathbf{I}\{\mathbf{X}_i^{s.urb} = \textit{urban}\} + \beta_8(1 - \mathbf{X}_{j[i],t[i]}^{c.urb})\mathbf{I}\{\mathbf{X}_i^{s.urb} = \textit{urban}\}t[i], \end{aligned} \quad (25)$$

where  $\mathbf{X}_i^{c.vrg}$  is the indicator for whether the coverage of study  $i$ , in country  $j$  and year  $t$ , is subnational or community,  $\mathbf{X}_i^{s.urb}$  is the indicator for whether the study  $i$  covered rural-only or urban-only populations, and  $\mathbf{X}_{j[i],t[i]}^{c.urb}$  is the percentage of the national population of country  $j$  in year  $t$  living in urban areas, as obtained from the 2018 revision to the United Nation's World Urbanization Prospects.<sup>25</sup> We note that  $\beta_5$  through  $\beta_8$  are all multiplied by zero for studies which are urban-only in countries where all residents lived in urban areas (e.g., Singapore) and for studies which are rural-only in countries where all residents lived in rural areas (e.g., Tokelau), i.e., in such cases the model does not consider studies classified as urban (respectively rural) to have potential systematic differences from the true underlying prevalence in the country.

Even after accounting for sampling variability, national studies may still not reflect the true prevalence of diabetes in a country with perfect accuracy, due to factors related to response and measurement, and subnational and community studies have even larger variability. We include the study-specific random effect  $e_i$  to allow all age groups from the same study to have an unusually high or an unusually low prevalence, after conditioning on the other terms in the

model. Each  $e_i$  is assigned a Gaussian prior with variance dependent on whether study  $i$  is representative at the national, subnational or community level. Random effects from national studies were constrained to have smaller variance ( $v_n$ ) than random effects of subnational studies ( $v_s$ ), which were in turn constrained to have smaller variance than community studies ( $v_c$ ).

#### *Additional age-by-study variability*

The additional variance term  $v_{h,i}^2$  in the model accounts for the additional variability arising from our use of regression models to estimate diabetes prevalence based on the primary definition for two types of studies described under *Data cleaning and management* section of Appendix Text 2. The first are the studies that only measured one glycaemic marker, for which we used previously-validated conversion regressions to obtain prevalence based on the primary definition.<sup>8</sup> The second are those that only had data for diabetes prevalence based on a different definition or for mean FPG or mean HbA1c, for which we used regression models to convert to diabetes prevalence based on the primary definition. This additional variance term is fixed for each data point and calculated using a simulation approach. Specifically, we sampled 2,000 draws from the joint distribution of the regression coefficients. We used each draw of regression coefficients to repeatedly calculate diabetes prevalence based on the primary definition. We then calculated  $v_{h,i}^2$  term as the variance of the 2,000 probit-transformed diabetes prevalence, by study, sex and age group. The  $v_{h,i}^2$  term is zero when the primary outcome was calculated directly from the data.

Finally, the age patterns across communities within a given country may differ from the overall age pattern of that country. This within-study variability cannot be captured by the  $e_i$  terms, which are equal across age-specific observations in each study, so we included an additional variance component for each study,  $\tau^2$ .

### *Model specification for treatment coverage*

As mentioned above, the parameters in the models for diabetes prevalence and diabetes treatment were estimated independently. In the model for treatment coverage, we modelled the latent variable  $\zeta_{h,i}$ , the probit-transformed treatment coverage, in the same way as we modelled the latent variable  $\alpha_{h,i}$  for diabetes prevalence. We modelled  $\zeta_{h,i}$  with a Gaussian distribution:

$$\zeta_{h,i} \sim N(a_{j[i]} + b_{j[i]}t[i] + u_{j[i],t[i]} + \gamma_i(z_h) + \mathbf{X}_i\boldsymbol{\beta} + e_i, \tau^2 + v_{h,i}^2), \quad (26)$$

with the components having the same definitions as above. Similar to the model for diabetes prevalence, the additional variance term  $v_{h,i}^2$  accounts for the uncertainty from our use of regression models to estimate diabetes prevalence based on the primary definition which appears in the denominator for treatment coverage. We applied the normal prior  $\mathcal{N}(0,1)$  to the other latent variable  $\alpha_{h,i}$ , with this prior again being equivalent to an uninformative uniform distribution on  $[0, 1]$  in the prevalence scale. Only group A studies were used to fit this model because group B studies did not contain data on treatment.

### *Model implementation*

The model was fitted through a bespoke MCMC sampler coded in R, which uses a combination of Metropolis-Hastings and Gibbs updates.<sup>26</sup> Details of the approach for generating starting values were given in a previous paper.<sup>2</sup>

We had a target of eight converged MCMC chains for generating our estimates, which is twice the recommended minimum number to assess convergence using the Rhat diagnostic.<sup>27,28</sup> We ran ten chains for each outcome (prevalence, treatment) and sex combination, with chains ordered by their seeds. The additional two chains per outcome and sex were run to allow for a small number of the first eight chains to be discarded if mixing was slow. In practice, only five of the 32 chains were slow to converge and were replaced. We did not run more chains because the computational and time cost outweighed the gains, if any, in results. We identified,

through visual inspection of hyperparameter trace plots, a burn-in period of 25,000 iterations for diabetes prevalence, and 100,000 for diabetes treatment because treatment models required more iterations for convergence. We took 50,000 post-burn-in iterations from each of the eight target chains, and combined and thinned to obtain a final sample of 5,000 posterior draws for each outcome. Convergence was confirmed through visual inspection as well as through calculated split-Rhat diagnostic for country-year-age outcomes as implemented in the R package 'rstan' v2.26.15.<sup>27,29</sup> The 97.5<sup>th</sup> quantile of split-Rhat for the two primary outcomes and two sexes ranged from 1.005 to 1.066. 99% of country-year-age combinations for the two primary outcomes and two sexes had split-Rhat <1.05.

#### *Model inference and post-processing*

All inference was done for country-year-age combinations, through combining the  $a$ ,  $b$ ,  $u$ , and  $\gamma$  terms, and setting  $\beta = e_i = 0$ . We set  $\beta = 0$  as fixed effects associated with study design are not relevant for country-level inference. We set  $e_i = 0$  as random effects arising from imperfections and variations in study design and implementation, and from within-country variability of the primary outcomes, are also not relevant for country-level inference.

Posterior estimates were made in five-year age groups. For presentation, we summarised the age-specific results as age-standardised results. Age-standardisation puts the population for each country-year on the same (standard) age distribution, and hence enables comparisons to be made over time and across countries. Age-standardisation was performed by taking the weighted means of age-sex-specific estimates, using age weights from the WHO standard population.<sup>30</sup> Estimates for regions and the world were calculated as population-weighted averages of the constituent country estimates by sex and age group, using population data obtained from the United Nations' World Population Prospects (2024 revision).<sup>31</sup> Consistent with analysis of hypertension treatment,<sup>16</sup> when calculating age-standardised treatment we also accounted for the age pattern of diabetes prevalence, because the denominator of treatment is only people with diabetes, by multiplying the WHO standard population weights

with age-specific diabetes prevalence in each country and year. The number of adults who had diabetes or untreated diabetes were calculated by multiplying the corresponding age-specific prevalence by the age-specific population by sex, country, and year.

The uncertainties of our estimates, represented by their posterior distributions, include the following sources: uncertainty due to sampling in each data source; uncertainty associated with the variability of national data beyond what is accounted for by sampling; uncertainty associated with subnational and community data, which are more variable than national data; uncertainty associated with using regression equations to estimate the primary outcomes; and uncertainty due to making estimates by country, year, and age when data were missing, scarce or weakly informative. The reported credible intervals (CrI) represent the 2.5<sup>th</sup> to 97.5<sup>th</sup> percentiles of the posterior distributions, which contain the true estimates with 95% probability. We obtained the posterior probability (PP) that an estimated change in diabetes prevalence or treatment coverage represented a true increase as the proportion of draws from the posterior distribution that indicated an increase, i.e., a positive change.

**Appendix Text 4.** Decomposition of change in the number of people with untreated diabetes

The number of people with untreated diabetes in 1990 can be written as:

$$N_{1990} = P_{1990} \times DP_{1990} \times (1 - TC_{1990}),$$

where  $N_{1990}$  is the number of people with untreated diabetes in 1990,  $P_{1990}$  is the population in 1990,  $DP_{1990}$  is diabetes prevalence in 1990, and  $TC_{1990}$  is treatment coverage in 1990.

Similarly for a later year *year2*:

$$N_{year2} = P_{year2} \times DP_{year2} \times (1 - TC_{year2}).$$

Total change in  $N$  from 1990 to *year2* is the subtraction of the above two numbers, as below:

$$\begin{aligned} \text{Total change in } N &= N_{year2} - N_{1990} \\ &= P_{year2} \times DP_{year2} \times (1 - TC_{year2}) - P_{1990} \times DP_{1990} \times (1 - TC_{1990}). \end{aligned}$$

Algebraically, *Total change in N* can be written as the sum of the *Contribution attributed to change in P*, the *Contribution attributed to change in DP*, the *Contribution attributed to change in TC*, and a fourth term that represents the residual change after accounting for the three named contributions. The first three terms are defined as below, with the residual being the difference between the total change and the sum of the first three:

*Contribution attributed to change in P*

$$= (P_{year2} - P_{1990}) \times DP_{1990} \times (1 - TC_{1990}),$$

*Contribution attributed to change in DP*

$$= P_{1990} \times (DP_{year2} - DP_{1990}) \times (1 - TC_{1990}),$$

*Contribution attributed to change in TC*

$$= P_{1990} \times DP_{1990} \times [(1 - TC_{year2}) - (1 - TC_{1990})],$$

*Residual term*

$$\begin{aligned} &= P_{year2} \times DP_{year2} \times (1 - TC_{year2}) - P_{year2} \times DP_{1990} \times (1 - TC_{1990}) \\ &- P_{1990} \times DP_{year2} \times (1 - TC_{1990}) - P_{1990} \times DP_{1990} \times (1 - TC_{year2}) \\ &+ 2 \times P_{1990} \times DP_{1990} \times (1 - TC_{1990}). \end{aligned}$$

**Appendix Table 1.** Data sources used in the analysis.

|    | Country                | Data years | Survey/Study name/Citation                                                                                                                                                        | Level of representativeness | Rural, urban, or both | Age range as used for global analysis |       | Sample size used for global analysis |        | Glycaemic markers available | Information available on diabetes treatment | Whether measured in a laboratory or by a point-of-care portable device |          | Notes |
|----|------------------------|------------|-----------------------------------------------------------------------------------------------------------------------------------------------------------------------------------|-----------------------------|-----------------------|---------------------------------------|-------|--------------------------------------|--------|-----------------------------|---------------------------------------------|------------------------------------------------------------------------|----------|-------|
|    |                        |            |                                                                                                                                                                                   |                             |                       | Female                                | Male  | Female                               | Male   |                             |                                             | Glucose                                                                | HbA1c    |       |
| 1  | Afghanistan            | 2018       | STEPS                                                                                                                                                                             | National                    | both                  | 18-69                                 | 18-69 | 1,727                                | 1,993  | Fasting glucose             | Yes                                         | Portable                                                               |          |       |
| 2  | Algeria                | 2001       | Temmar et al., J Hypertens 25:2218-26, 2007                                                                                                                                       | Community                   | rural                 | 35+                                   | 35+   | 655                                  | 561    | Fasting glucose             | No                                          | Unknown                                                                |          |       |
| 3  | Algeria                | 2003       | STEPS                                                                                                                                                                             | Subnational                 | both                  | 25-64                                 | 25-64 | 2,451                                | 1,613  | Fasting glucose             | Yes                                         | Unknown                                                                |          |       |
| 4  | Algeria                | 2005       | Transition and Health Impact in North Africa                                                                                                                                      | National                    | both                  | 35-70                                 | 35-70 | 2,770                                | 2,002  | Fasting glucose             | Yes                                         | Portable                                                               |          |       |
| 5  | Algeria                | 2007-2009  | The ISOR (Insulino-resistance in ORan) Study                                                                                                                                      | Community                   | urban                 | 30-64                                 | 30-64 | 408                                  | 375    | Fasting glucose             | Yes                                         | Lab                                                                    |          |       |
| 6  | Algeria                | 2016-2017  | STEPS                                                                                                                                                                             | National                    | both                  | 18-69                                 | 18-69 | 3,690                                | 3,022  | Fasting glucose             | Yes                                         | Portable                                                               |          |       |
| 7  | American Samoa         | 1994       | McGarvey, Pac Health Dialog 8(1):157-62, 2001                                                                                                                                     | National                    | both                  | 29+                                   | 29+   | 247                                  | 165    | Fasting glucose             | Yes                                         | Lab                                                                    |          |       |
| 8  | American Samoa         | 2004       | STEPS                                                                                                                                                                             | National                    | both                  | 25-64                                 | 25-64 | 1,061                                | 945    | Fasting glucose             | Yes                                         | Portable                                                               |          |       |
| 9  | Angola                 | 2013-2014  | CardioBengo - Population based cardiovascular longitudinal study in Bengo Province, Angola                                                                                        | Community                   | both                  | 18-65                                 | 18-65 | 1,348                                | 768    | Fasting glucose             | Yes                                         | Portable                                                               |          |       |
| 10 | Argentina              | 2004-2005  | CArdiovascular Risk factors Multiple Evaluation in Latin America (CARMELA)                                                                                                        | Community                   | urban                 | 25-64                                 | 25-64 | 748                                  | 734    | Fasting glucose             | Yes                                         | Lab                                                                    |          |       |
| 11 | Argentina              | 2011-2012  | CESCAS Study                                                                                                                                                                      | Community                   | urban                 | 35-74                                 | 35-74 | 2,362                                | 1,576  | Fasting glucose             | Yes                                         | Lab                                                                    |          |       |
| 12 | Argentina              | 2018       | Encuesta Nacional de Factores de Riesgo 2018                                                                                                                                      | National                    | both                  | 18+                                   | 18+   | 15,406                               | 11,925 | Fasting glucose             | Yes                                         | Unknown                                                                |          |       |
| 13 | Armenia                | 2016       | STEPS                                                                                                                                                                             | National                    | both                  | 18-69                                 | 18-69 | 1,582                                | 736    | Fasting glucose             | Yes                                         | Portable                                                               |          |       |
| 14 | Australia              | 1981       | APCSC-Busseton                                                                                                                                                                    | Community                   | urban                 | 25+                                   | 25+   | 701                                  | 608    | Fasting glucose             | No                                          | Unknown                                                                |          |       |
| 15 | Australia              | 1981       | Glatthaar et al., Med J Aust 143:436-40, 1985                                                                                                                                     | Community                   | both                  | 25+                                   | 25+   | 1,739                                | 1,457  | Fasting glucose             | No                                          | Unknown                                                                |          |       |
| 16 | Australia              | 1983       | Risk Factor Prevalence Study                                                                                                                                                      | National                    | urban                 | 25-64                                 | 25-64 | 3,811                                | 3,731  | Fasting glucose             | Yes                                         | Unknown                                                                |          |       |
| 17 | Australia              | 1988-1989  | Dubbo Study of Australian Elderly                                                                                                                                                 | Community                   | urban                 | 59+                                   | 59+   | 1,222                                | 878    | Fasting glucose             | Yes                                         | Lab                                                                    |          |       |
| 18 | Australia              | 1999-2000  | The Australian Diabetes, Obesity and Lifestyle Study 1999-2000                                                                                                                    | National                    | both                  | 25+                                   | 25+   | 6,138                                | 5,043  | Fasting glucose, HbA1c      | Yes                                         | Lab                                                                    | Lab      |       |
| 19 | Australia              | 1999-2003  | North West Adelaide Health Study                                                                                                                                                  | Community                   | urban                 | 18+                                   | 18+   | 2,089                                | 1,891  | Fasting glucose, HbA1c      | No                                          | Lab                                                                    | Lab      |       |
| 20 | Australia              | 2004-2005  | The Australian Diabetes, Obesity and Lifestyle Study 2004-2005                                                                                                                    | National                    | both                  | 30+                                   | 30+   | 3,438                                | 2,890  | Fasting glucose, HbA1c      | Yes                                         | Lab                                                                    | Lab      |       |
| 21 | Australia              | 2004-2006  | North West Adelaide Health Study                                                                                                                                                  | Community                   | urban                 | 20+                                   | 20+   | 1,665                                | 1,498  | Fasting glucose, HbA1c      | No                                          | Lab                                                                    | Lab      |       |
| 22 | Australia              | 2008-2010  | North West Adelaide Health Study                                                                                                                                                  | Community                   | urban                 | 24+                                   | 24+   | 1,277                                | 1,142  | Fasting glucose, HbA1c      | No                                          | Lab                                                                    | Lab      |       |
| 23 | Australia              | 2012       | The Australian Diabetes, Obesity and Lifestyle Study 2012                                                                                                                         | National                    | both                  | 37+                                   | 37+   | 2,480                                | 2,029  | Fasting glucose, HbA1c      | Yes                                         | Lab                                                                    | Lab      |       |
| 24 | Australia              | 2011-2012  | National Health Measure Survey                                                                                                                                                    | National                    | both                  | 18+                                   | 18+   | 4,153                                | 3,320  | Fasting glucose, HbA1c      | No                                          | Lab                                                                    | Lab      |       |
| 25 | Austria                | 1985       | VHM&PP: Ulmer et al., J Intern Med 261:566-76, 2007                                                                                                                               | Subnational                 | both                  | 20+                                   | 20+   | 42,176                               | 32,600 | Fasting glucose             | No                                          | Unknown                                                                |          |       |
| 26 | Austria                | 1991       | CINDI survey Vorarberg/Austria                                                                                                                                                    | Subnational                 | both                  | 25-64                                 | 25-64 | 736                                  | 695    | Fasting glucose             | Yes                                         | Lab                                                                    |          |       |
| 27 | Austria                | 1992       | Vorarberg Health Monitoring and Promotion Programme (VHM&PP)                                                                                                                      | Subnational                 | both                  | 18+                                   | 18+   | 18,769                               | 14,104 | Fasting glucose             | No                                          | Lab                                                                    |          |       |
| 28 | Austria                | 1998       | Vorarberg Health Monitoring and Promotion Programme (VHM&PP)                                                                                                                      | Subnational                 | both                  | 18+                                   | 18+   | 20,902                               | 16,140 | Fasting glucose             | No                                          | Lab                                                                    |          |       |
| 29 | Austria                | 1998-1999  | CINDI survey Vorarberg/Austria                                                                                                                                                    | Subnational                 | both                  | 25-64                                 | 25-64 | 88                                   | 86     | Fasting glucose             | Yes                                         | Lab                                                                    |          |       |
| 30 | Austria                | 2004       | Vorarberg Health Monitoring and Promotion Programme (VHM&PP)                                                                                                                      | Subnational                 | both                  | 18+                                   | 18+   | 23,890                               | 20,159 | Fasting glucose             | No                                          | Lab                                                                    |          |       |
| 31 | Austria                | 2010-2012  | Austrian Study on Nutritional Status 2012                                                                                                                                         | National                    | both                  | 18-80                                 | 18-80 | 278                                  | 176    | Fasting glucose, HbA1c      | No                                          | Lab                                                                    | Lab      |       |
| 32 | Azerbaijan             | 2017       | STEPS                                                                                                                                                                             | National                    | both                  | 18-69                                 | 18-69 | 1,642                                | 1,136  | Fasting glucose             | Yes                                         | Portable                                                               |          |       |
| 33 | Bahamas                | 2019       | STEPS                                                                                                                                                                             | National                    | both                  | 18-69                                 | 18-69 | 1,403                                | 932    | Fasting glucose             | Yes                                         | Portable                                                               |          |       |
| 34 | Bahrain                | 2007       | STEPS                                                                                                                                                                             | National                    | both                  | 20-64                                 | 20-64 | 906                                  | 863    | Fasting glucose             | No                                          | Lab                                                                    |          |       |
| 35 | Bangladesh             | 2002       | Hussain et al., Diabet Med 22:931-6, 2005                                                                                                                                         | Community                   | rural                 | 20+                                   | 20+   | 2,720                                | 2,037  | Fasting glucose             | No                                          | Unknown                                                                |          |       |
| 36 | Bangladesh             | 2002       | Hussain et al., Diabet Med 22:931-6, 2005                                                                                                                                         | Community                   | urban                 | 20+                                   | 20+   | 824                                  | 731    | Fasting glucose             | No                                          | Unknown                                                                |          |       |
| 37 | Bangladesh             | 2006       | Urban Health Survey                                                                                                                                                               | Subnational                 | urban                 | 35-59                                 | 35-59 | 1,272                                | 1,520  | Fasting glucose             | Yes                                         | Portable                                                               |          |       |
| 38 | Bangladesh             | 2011       | Demographic and Health Survey Bangladesh 2011                                                                                                                                     | National                    | both                  | 35+                                   | 35+   | 3,572                                | 3,753  | Fasting glucose             | Yes                                         | Portable                                                               |          |       |
| 39 | Bangladesh             | 2011-2012  | Chronic Disease Risk Factor Study                                                                                                                                                 | Community                   | rural                 | 18+                                   | 18+   | 427                                  | 292    | Fasting glucose             | Yes                                         | Lab                                                                    |          |       |
| 40 | Bangladesh             | 2016       | Diabetes Mellitus: Action through community Groups or Health Information for better Control of population blood glucose, risk factors, knowledge and care seeking (DMagic)        | Subnational                 | rural                 | 30+                                   | 30+   | 6,414                                | 5,630  | Fasting glucose             | Yes                                         | Portable                                                               |          |       |
| 41 | Bangladesh             | 2017-2018  | Demographic and Health Survey Bangladesh 2017-2018                                                                                                                                | National                    | both                  | 18-49                                 | 18-49 | 4,858                                | 3,702  | Fasting glucose             | Yes                                         | Portable                                                               |          |       |
| 42 | Bangladesh             | 2018       | STEPS                                                                                                                                                                             | National                    | both                  | 18-69                                 | 18-69 | 3,702                                | 3,247  | Fasting glucose             | No                                          | Lab                                                                    |          |       |
| 43 | Barbados               | 1992       | Foster et al., Ethn Dis 3:404-12, 1993                                                                                                                                            | Community                   | both                  | 40+                                   | 40+   | 272                                  | 188    | Fasting glucose             | No                                          | Unknown                                                                |          |       |
| 44 | Barbados               | 1997-2002  | The Barbados Incidence Studies of Eye Diseases II                                                                                                                                 | National                    | both                  | 40-59                                 | 40-59 | 840                                  | 606    | HbA1c                       | No                                          | Unknown                                                                | Unknown  |       |
| 45 | Barbados               | 2011-2013  | Health of the Nation (HoN)                                                                                                                                                        | National                    | both                  | 25+                                   | 25+   | 741                                  | 469    | Fasting glucose, HbA1c      | Yes                                         | Lab                                                                    | Portable |       |
| 46 | Belarus                | 2016-2017  | STEPS                                                                                                                                                                             | National                    | both                  | 18-69                                 | 18-69 | 2,897                                | 2,089  | Fasting glucose             | Yes                                         | Portable                                                               |          |       |
| 47 | Belarus                | 2020       | STEPS                                                                                                                                                                             | National                    | both                  | 18-69                                 | 18-69 | 2,990                                | 2,280  | Fasting glucose             | Yes                                         | Portable                                                               |          |       |
| 48 | Belgium                | 1991-1994  | Flemish Study on Environment, Genes and Health Outcomes                                                                                                                           | Community                   | rural                 | 26+                                   | 26+   | 412                                  | 397    | Fasting glucose             | Yes                                         | Lab                                                                    |          |       |
| 49 | Belgium                | 2003       | The European Male Ageing Study                                                                                                                                                    | Community                   | both                  | 40+                                   | 40+   | 447                                  | 447    | Fasting glucose             | Yes                                         | Lab                                                                    |          |       |
| 50 | Belgium                | 2005-2008  | Flemish Study on Environment, Genes and Health Outcomes                                                                                                                           | Community                   | rural                 | 18+                                   | 18+   | 357                                  | 346    | Fasting glucose             | Yes                                         | Lab                                                                    |          |       |
| 51 | Belgium                | 2006-2008  | Flemish Study on Environment, Genes and Health Outcomes                                                                                                                           | Community                   | rural                 | 18+                                   | 18+   | 83                                   | 97     | Fasting glucose             | Yes                                         | Lab                                                                    |          |       |
| 52 | Belgium                | 2008       | The European Male Ageing Study                                                                                                                                                    | Community                   | both                  | 45+                                   | 45+   | 372                                  | 372    | Fasting glucose             | Yes                                         | Lab                                                                    |          |       |
| 53 | Belgium                | 2009-2013  | Flemish Study on Environment, Genes and Health Outcomes                                                                                                                           | Community                   | rural                 | 20+                                   | 20+   | 335                                  | 330    | Fasting glucose             | Yes                                         | Lab                                                                    |          |       |
| 54 | Belgium                | 2010-2015  | Flemish Study on Environment, Genes and Health Outcomes                                                                                                                           | Community                   | rural                 | 18+                                   | 18+   | 410                                  | 389    | Fasting glucose             | Yes                                         | Lab                                                                    |          |       |
| 55 | Belgium                | 2018-2019  | Belgian Health Examination Survey                                                                                                                                                 | National                    | both                  | 18+                                   | 18+   | 614                                  | 557    | Fasting glucose, HbA1c      | Yes                                         | Lab                                                                    | Lab      |       |
| 56 | Belize                 | 2005-2006  | CAMD1                                                                                                                                                                             | National                    | both                  | 20+                                   | 20+   | 1,021                                | 600    | Fasting glucose             | Yes                                         | Lab                                                                    |          |       |
| 57 | Benin                  | 2007       | STEPS                                                                                                                                                                             | Community                   | urban                 | 25-64                                 | 25-64 | 1,508                                | 955    | Fasting glucose             | Yes                                         | Portable                                                               |          |       |
| 58 | Benin                  | 2008       | STEPS                                                                                                                                                                             | National                    | both                  | 25-64                                 | 25-64 | 3,391                                | 3,442  | Fasting glucose             | Yes                                         | Portable                                                               |          |       |
| 59 | Benin                  | 2015       | STEPS                                                                                                                                                                             | National                    | both                  | 18-69                                 | 18-69 | 2,547                                | 2,307  | Fasting glucose             | Yes                                         | Portable                                                               |          |       |
| 60 | Bhutan                 | 2007       | STEPS                                                                                                                                                                             | Community                   | urban                 | 25-74                                 | 25-74 | 1,330                                | 1,132  | Fasting glucose             | Yes                                         | Lab                                                                    |          |       |
| 61 | Bhutan                 | 2014       | STEPS                                                                                                                                                                             | National                    | both                  | 18-69                                 | 18-69 | 1,682                                | 1,072  | Fasting glucose             | Yes                                         | Portable                                                               |          |       |
| 62 | Bhutan                 | 2019       | STEPS                                                                                                                                                                             | National                    | both                  | 18-69                                 | 18-69 | 3,280                                | 2,099  | Fasting glucose             | Yes                                         | Portable                                                               |          |       |
| 63 | Bolivia                | 2005-2007  | Cardiovascular and metabolic syndrome risk assessment of Bolivian school children and adolescents - Relationships to obesity, diabetes, income, food intake and physical activity | National                    | both                  | 18                                    | 18    | 139                                  | 144    | Fasting glucose             | Yes                                         | Lab                                                                    |          |       |
| 64 | Bosnia and Herzegovina | 2012       | Non-communicable disease risk factor survey, Federation of B&H                                                                                                                    | Subnational                 | rural                 | 18+                                   | 18+   | 1,288                                | 1,201  | Fasting glucose             | Yes                                         | Portable                                                               |          |       |



|     | Country                  | Data years | Survey/Study name/Citation                                                                                                       | Level of representativeness | Rural, urban, or both | Age range as used for global analysis |       | Sample size used for global analysis |        | Glycaemic markers available | Information available on diabetes treatment | Whether measured in a laboratory or by a point-of-care portable device |         | Notes |
|-----|--------------------------|------------|----------------------------------------------------------------------------------------------------------------------------------|-----------------------------|-----------------------|---------------------------------------|-------|--------------------------------------|--------|-----------------------------|---------------------------------------------|------------------------------------------------------------------------|---------|-------|
|     |                          |            |                                                                                                                                  |                             |                       | Female                                | Male  | Female                               | Male   |                             |                                             | Glucose                                                                | HbA1c   |       |
| 65  | Bosnia and Herzegovina   | 2012       | Non-communicable disease risk factor survey, Federation of B&H                                                                   | Subnational                 | urban                 | 18+                                   | 18+   | 716                                  | 594    | Fasting glucose             | Yes                                         | Portable                                                               |         |       |
| 66  | Botswana                 | 2014       | STEPS                                                                                                                            | National                    | both                  | 18-69                                 | 18-69 | 2,546                                | 1,252  | Fasting glucose             | Yes                                         | Portable                                                               |         |       |
| 67  | Brazil                   | 1991       | Fomes et al., Rev Saude Publica 36:12-8, 2002                                                                                    | Community                   | urban                 | 25+                                   | 25+   | 547                                  | 386    | Fasting glucose             | No                                          | Unknown                                                                |         |       |
| 68  | Brazil                   | 1992       | EPIDOSO; Ramos et al., Rev Saude Publica 32:397-407, 1998                                                                        | Community                   | urban                 | 65+                                   | 65+   | 293                                  | 171    | Fasting glucose             | No                                          | Unknown                                                                |         |       |
| 69  | Brazil                   | 1996-1997  | The Bambui Cohort Study of Ageing                                                                                                | Community                   | urban                 | 18+                                   | 18+   | 1,389                                | 974    | Fasting glucose             | Yes                                         | Lab                                                                    |         |       |
| 70  | Brazil                   | 1999-2000  | Prevalence of Risk Factors for Coronary Artery Disease in the State of Rio Grande do Sul                                         | Subnational                 | urban                 | 20+                                   | 20+   | 467                                  | 430    | Fasting glucose             | Yes                                         | Lab                                                                    |         |       |
| 71  | Brazil                   | 2003       | Marquezzine et al., Int J Cardiol 129:259-65, 2004                                                                               | Community                   | urban                 | 25-64                                 | 25-64 | 1,787                                | 1,042  | Fasting glucose             | No                                          | Unknown                                                                |         |       |
| 72  | Brazil                   | 2004       | Caju & Virgen das Gracias                                                                                                        | Community                   | rural                 | 18+                                   | 18+   | 288                                  | 291    | Fasting glucose             | Yes                                         | Lab                                                                    |         |       |
| 73  | Brazil                   | 2002-2004  | 1978-1979 Ribeira Preto Birth Cohort                                                                                             | Community                   | urban                 | 22-25                                 | 22-25 | 1,086                                | 1,015  | Fasting glucose             | Yes                                         | Lab                                                                    |         |       |
| 74  | Brazil                   | 2003-2005  | Sao Paulo Health and Ageing Study                                                                                                | Community                   | urban                 | 65+                                   | 65+   | 1,255                                | 817    | Fasting glucose             | Yes                                         | Lab                                                                    |         |       |
| 75  | Brazil                   | 2004-2006  | Hearts of Brazil                                                                                                                 | National                    | urban                 | 18+                                   | 18+   | 655                                  | 577    | Fasting glucose             | Yes                                         | Portable                                                               |         |       |
| 76  | Brazil                   | 2008       | The Bambui Cohort Study of Ageing                                                                                                | Community                   | urban                 | 71+                                   | 71+   | 518                                  | 266    | Fasting glucose             | Yes                                         | Lab                                                                    |         |       |
| 77  | Brazil                   | 2008       | Caju & Virgen das Gracias                                                                                                        | Community                   | rural                 | 18+                                   | 18+   | 289                                  | 273    | Fasting glucose             | Yes                                         | Lab                                                                    |         |       |
| 78  | Brazil                   | 2010       | San Pedro                                                                                                                        | Community                   | rural                 | 18+                                   | 18+   | 208                                  | 146    | Fasting glucose             | Yes                                         | Lab                                                                    |         |       |
| 79  | Brazil                   | 2011-2012  | The 1993 Pelotas (Brazil) Birth Cohort: 18 years follow-up                                                                       | Community                   | urban                 | 18-19                                 | 18-19 | 1,963                                | 1,883  | HbA1c                       | Yes                                         | Lab                                                                    | Lab     |       |
| 80  | Brazil                   | 2010-2015  | Baependi Heart Study                                                                                                             | Community                   | rural                 | 18+                                   | 18+   | 1,407                                | 1,057  | Fasting glucose, HbA1c      | Yes                                         | Lab                                                                    | Lab     |       |
| 81  | Brazil                   | 2012-2013  | The 1982 Pelotas (Brazil) Birth Cohort: 30 years follow-up                                                                       | Community                   | urban                 | 30                                    | 30    | 1,737                                | 1,684  | HbA1c                       | No                                          | Lab                                                                    | Lab     |       |
| 82  | Brazil                   | 2013       | Pesquisas Nacional de Saude                                                                                                      | National                    | both                  | 18+                                   | 18+   | 32,671                               | 25,141 | HbA1c                       | Yes                                         | Unknown                                                                | Unknown |       |
| 83  | Brazil                   | 2011-2014  | Profile of Risk Factors for Coronary Arterial Disease in Rio Grande do Sul - Reevaluation After 10 Years                         | Subnational                 | urban                 | 20+                                   | 20+   | 465                                  | 362    | Fasting glucose             | Yes                                         | Lab                                                                    |         |       |
| 84  | Brazil                   | 2014-2015  | II Diagnóstico de Saúde da População Materno-Infantil do Estado de Alagoas                                                       | Subnational                 | both                  | 19-49                                 |       | 3,146                                |        | Fasting glucose             | Yes                                         | Portable                                                               |         |       |
| 85  | Brazil                   | 2014-2015  | EpiFloripa Cohort Study of Ageing - Wave 2, Clinical and Laboratory Exams                                                        | Community                   | urban                 | 63+                                   | 63+   | 386                                  | 209    | HbA1c                       | No                                          | Lab                                                                    | Lab     |       |
| 86  | Brazil                   | 2014-2015  | EpiFloripa Adults Cohort Study                                                                                                   | Community                   | urban                 | 25-65                                 | 25-65 | 410                                  | 298    | Fasting glucose, HbA1c      | No                                          | Lab                                                                    | Lab     |       |
| 87  | Brazil                   | 2015-2016  | The Ouro Preto Study                                                                                                             | Community                   | rural                 | 18+                                   | 18+   | 330                                  | 186    | Fasting glucose             | Yes                                         | Lab                                                                    |         |       |
| 88  | Brunei Darussalam        | 2010-2011  | National Health And Nutritional Status Survey (NHANSS)                                                                           | National                    | both                  | 20-75                                 | 20-75 | 807                                  | 675    | Fasting glucose, HbA1c      | Yes                                         | Lab                                                                    | Lab     |       |
| 89  | Brunei Darussalam        | 2015-2016  | National Non-Communicable Diseases Survey (NNCDS)                                                                                | National                    | both                  | 18-69                                 | 18-69 | 2,114                                | 1,677  | Fasting glucose             | Yes                                         | Lab                                                                    |         |       |
| 90  | Burkina Faso             | 2013       | STEPS                                                                                                                            | National                    | both                  | 25-64                                 | 25-64 | 2,289                                | 2,254  | Fasting glucose             | Yes                                         | Portable                                                               |         |       |
| 91  | Burkina Faso             | 2021       | STEPS                                                                                                                            | National                    | both                  | 18-69                                 | 18-69 | 2,026                                | 1,491  | Fasting glucose             | Yes                                         | Portable                                                               |         |       |
| 92  | Cabo Verde               | 2007       | STEPS                                                                                                                            | National                    | both                  | 25-64                                 | 25-64 | 1,076                                | 664    | Fasting glucose             | Yes                                         | Portable                                                               |         |       |
| 93  | Cabo Verde               | 2020       | STEPS                                                                                                                            | National                    | both                  | 18-69                                 | 18-69 | 1,994                                | 1,318  | Fasting glucose             | Yes                                         | Portable                                                               |         |       |
| 94  | Cambodia                 | 2010       | STEPS                                                                                                                            | National                    | both                  | 25-64                                 | 25-64 | 3,410                                | 1,937  | Fasting glucose             | Yes                                         | Portable                                                               |         |       |
| 95  | Cambodia                 | 2023       | STEPS                                                                                                                            | National                    | both                  | 18-69                                 | 18-69 | 2,677                                | 1,513  | Fasting glucose             | Yes                                         | Portable                                                               | 2       |       |
| 96  | Cameroon                 | 1998-1999  | Essential Non-communicable disease Health Intervention Project (ENHIP)                                                           | Community                   | rural                 | 18+                                   | 18+   | 698                                  | 485    | Fasting glucose             | Yes                                         | Portable                                                               |         |       |
| 97  | Cameroon                 | 1998-1999  | Essential Non-communicable disease Health Intervention Project (ENHIP)                                                           | Community                   | urban                 | 18+                                   | 18+   | 538                                  | 430    | Fasting glucose             | Yes                                         | Portable                                                               |         |       |
| 98  | Cameroon                 | 2000       | Defining the relationship between poverty and non-communicable disease burden in Cameroon: Preliminary report; Infobase 101051a1 | Subnational                 | urban                 | 18+                                   | 18+   | 2,028                                | 1,641  | Fasting glucose             | No                                          | Unknown                                                                |         |       |
| 99  | Cameroon                 | 2007       | Cameroon Burden of Diabetes - Second Survey                                                                                      | Subnational                 | urban                 | 18+                                   | 18+   | 4,581                                | 3,305  | Fasting glucose             | Yes                                         | Portable                                                               |         |       |
| 100 | Cameroon                 | 2014       | Prevalence and determinants of chronic kidney disease in rural and urban Cameroonians: A cross-sectional study                   | Community                   | both                  | 20+                                   | 20+   | 253                                  | 183    | Fasting glucose             | Yes                                         | Unknown                                                                |         |       |
| 101 | Cameroon                 | 2014-2015  | Cardiovascular risk factors screening in urban and rural areas in the Far-North Region Cameroon                                  | Subnational                 | both                  | 20+                                   | 20+   | 369                                  | 520    | Fasting glucose             | Yes                                         | Portable                                                               |         |       |
| 102 | Cameroon                 | 2018       | Prevalence and determinants of chronic kidney disease in urban adults' populations of northern Cameroon                          | Community                   | urban                 | 20+                                   | 20+   | 220                                  | 209    | Fasting glucose             | No                                          | Unknown                                                                |         |       |
| 103 | Canada                   | 1993-1995  | Kriska et al., Diabetes Care 24:1787-92, 2001                                                                                    | Community                   | rural                 | 18-35                                 | 18-35 | 180                                  | 136    | Fasting glucose             | No                                          | Lab                                                                    |         |       |
| 104 | Canada                   | 1995-1997  | Canadian Multicentre Osteoporosis Study (CaMos) - Adult Baseline                                                                 | Community                   | both                  | 25+                                   | 25+   | 6,539                                | 2,884  | Fasting glucose             | Yes                                         | Lab                                                                    |         |       |
| 105 | Canada                   | 2005-2008  | Canadian Multicentre Osteoporosis Study (CaMos) - Adult Year 10 follow-up                                                        | Subnational                 | both                  | 35+                                   | 35+   | 3,993                                | 1,570  | Fasting glucose             | Yes                                         | Lab                                                                    |         |       |
| 106 | Canada                   | 2007-2009  | Canadian Health Measures Survey, Cycle 1                                                                                         | National                    | both                  | 18-79                                 | 18-79 | 859                                  | 789    | Fasting glucose, HbA1c      | Yes                                         | Lab                                                                    | Lab     |       |
| 107 | Canada                   | 2009-2011  | Canadian Health Measures Survey, Cycle 2                                                                                         | National                    | both                  | 18-79                                 | 18-79 | 955                                  | 825    | Fasting glucose, HbA1c      | Yes                                         | Lab                                                                    | Lab     |       |
| 108 | Canada                   | 2012-2013  | Canadian Health Measures Survey, Cycle 3                                                                                         | National                    | both                  | 18-79                                 | 18-79 | 763                                  | 798    | Fasting glucose, HbA1c      | Yes                                         | Lab                                                                    | Lab     |       |
| 109 | Canada                   | 2014-2015  | Canadian Health Measures Survey, Cycle 4                                                                                         | National                    | both                  | 18-79                                 | 18-79 | 764                                  | 736    | Fasting glucose, HbA1c      | Yes                                         | Lab                                                                    | Lab     |       |
| 110 | Canada                   | 2016-2017  | Canadian Health Measures Survey, Cycle 5                                                                                         | National                    | both                  | 18-79                                 | 18-79 | 759                                  | 787    | Fasting glucose, HbA1c      | Yes                                         | Lab                                                                    | Lab     |       |
| 111 | Canada                   | 2018-2019  | Canadian Health Measures Survey, Cycle 6                                                                                         | National                    | both                  | 18-79                                 | 18-79 | 750                                  | 809    | Fasting glucose, HbA1c      | Yes                                         | Lab                                                                    | Lab     |       |
| 112 | Central African Republic | 2010       | STEPS                                                                                                                            | Subnational                 | both                  | 25-64                                 | 25-64 | 1,998                                | 1,882  | Fasting glucose             | Yes                                         | Portable                                                               |         |       |
| 113 | Chile                    | 1988       | Chilean Health Study                                                                                                             | Subnational                 | urban                 | 18+                                   | 18+   | 688                                  | 415    | Fasting glucose             | Yes                                         | Lab                                                                    |         |       |
| 114 | Chile                    | 1992-1993  | Miquel et al., Gastroenterology 115(4):937-46, 1998                                                                              | Community                   | urban                 | 18+                                   | 18+   | 1,032                                | 657    | Fasting glucose             | No                                          | Lab                                                                    |         |       |
| 115 | Chile                    | 2000       | Nervi et al., J Hepatol 45(2):299-305, 2006                                                                                      | Community                   | urban                 | 18+                                   | 18+   | 625                                  | 335    | Fasting glucose             | No                                          | Lab                                                                    |         |       |
| 116 | Chile                    | 2003       | Encuesta Nacional de Salud                                                                                                       | National                    | both                  | 18+                                   | 18+   | 1,951                                | 1,632  | Fasting glucose             | Yes                                         | Lab                                                                    |         |       |
| 117 | Chile                    | 2004-2005  | CArdiovascular Risk factors Multiple Evaluation in Latin America (CARMELA)                                                       | Community                   | urban                 | 25-64                                 | 25-64 | 872                                  | 783    | Fasting glucose             | Yes                                         | Lab                                                                    |         |       |
| 118 | Chile                    | 2009-2010  | Encuesta Nacional de Salud                                                                                                       | National                    | both                  | 18+                                   | 18+   | 2,791                                | 1,841  | Fasting glucose             | Yes                                         | Lab                                                                    |         |       |
| 119 | Chile                    | 2011-2012  | CESCAS Study                                                                                                                     | Community                   | urban                 | 35-74                                 | 35-74 | 999                                  | 916    | Fasting glucose             | Yes                                         | Lab                                                                    |         |       |
| 120 | Chile                    | 2016-2017  | Encuesta Nacional de Salud                                                                                                       | National                    | both                  | 18+                                   | 18+   | 3,796                                | 2,199  | Fasting glucose             | Yes                                         | Lab                                                                    |         |       |
| 121 | China                    | 1992-1993  | Anzhen 02 Cohort Study                                                                                                           | Community                   | urban                 | 34-65                                 | 34-65 | 2,112                                | 2,030  | Fasting glucose             | No                                          | Unknown                                                                |         |       |
| 122 | China                    | 1991-1992  | Fangshan Cohort Study                                                                                                            | Community                   | urban                 | 34-86                                 | 34-86 | 555                                  | 266    | Fasting glucose             | No                                          | Unknown                                                                |         |       |
| 123 | China                    | 1995-1996  | Hong Kong Cardiovascular Risk Factor Prevalence Study 1995-1996                                                                  | Community                   | urban                 | 25-74                                 | 25-74 | 1,483                                | 1,412  | Fasting glucose             | Yes                                         | Lab                                                                    |         |       |
| 124 | China                    | 1997       | DECODA; DECODA Study Group, Diabetes Care 26:1770-80, 2003                                                                       | Community                   | urban                 | 30-89                                 | 30-89 | 2,571                                | 1,577  | Fasting glucose             | No                                          | Unknown                                                                |         |       |
| 125 | China                    | 2000-2001  | The International Collaborative Study of Cardiovascular Disease in Asia                                                          | National                    | both                  | 35-74                                 | 35-74 | 7,828                                | 7,327  | Fasting glucose             | No                                          | Lab                                                                    |         |       |
| 126 | China                    | 2003       | Fan et al., World J Gastroenterol 14:2418-24, 2008                                                                               | Community                   | both                  | 25+                                   | 25+   | 7,770                                | 5,529  | Fasting glucose             | No                                          | Unknown                                                                |         |       |

|     | Country      | Data years | Survey/Study name/Citation                                                                    | Level of representativeness | Rural, urban, or both | Age range as used for global analysis |       | Sample size used for global analysis |         | Glycaemic markers available | Information available on diabetes treatment | Whether measured in a laboratory or by a point-of-care portable device |       | Notes |
|-----|--------------|------------|-----------------------------------------------------------------------------------------------|-----------------------------|-----------------------|---------------------------------------|-------|--------------------------------------|---------|-----------------------------|---------------------------------------------|------------------------------------------------------------------------|-------|-------|
|     |              |            |                                                                                               |                             |                       | Female                                | Male  | Female                               | Male    |                             |                                             | Glucose                                                                | HbA1c |       |
| 127 | China        | 2003       | Wu, et al., Prev Med 51:412-5, 2010                                                           | Community                   | both                  | 15+                                   | 15+   | 8,260                                | 6,123   | Fasting glucose             | No                                          | Unknown                                                                |       | 3     |
| 128 | China        | 2004       | Tian et al., Diabets Res Clin Pract 84:273-8, 2009                                            | Community                   | rural                 | 35+                                   | 35+   | 405,011                              | 364,781 | Fasting glucose             | No                                          | Unknown                                                                |       |       |
| 129 | China        | 2005       | Zhi et al., Chin Med Sci J 23:249-52, 2008                                                    | Community                   | both                  | 18-69                                 | 18-69 | 10,716                               | 9,943   | Fasting glucose             | No                                          | Unknown                                                                |       |       |
| 130 | China        | 2004-2005  | Xinjiang Children and Adolescent Survey                                                       | Community                   | urban                 | 18                                    | 18    | 68                                   | 55      | Fasting glucose             | No                                          | Portable                                                               |       |       |
| 131 | China        | 2006       | Beijing Eye Study                                                                             | Community                   | both                  | 45+                                   | 45+   | 1,827                                | 1,393   | Fasting glucose             | Yes                                         | Lab                                                                    |       |       |
| 132 | China        | 2006       | Qingdao Diabetes Cohort Study                                                                 | Community                   | both                  | 35-74                                 | 35-74 | 2,310                                | 1,536   | Fasting glucose, HbA1c      | Yes                                         | Lab                                                                    | Lab   |       |
| 133 | China        | 2006-2007  | Fu et al., BMC Public Health 11:862, 2011                                                     | Community                   | rural                 | 18-64                                 | 18-64 | 2,582                                | 1,815   | Fasting glucose             | No                                          | Lab                                                                    |       |       |
| 134 | China        | 2006-2007  | Handan Eye Study                                                                              | Community                   | rural                 | 30+                                   | 30+   | 3,430                                | 2,998   | Fasting glucose             | Yes                                         | Lab                                                                    |       |       |
| 135 | China        | 2008-2009  | Chinese Longitudinal Healthy Longevity Survey                                                 | Subnational                 | both                  | 65+                                   | 65+   | 753                                  | 477     | Fasting glucose             | No                                          | Lab                                                                    |       | 4     |
| 136 | China        | 2009       | China Health and Nutrition Study                                                              | National                    | both                  | 18+                                   | 18+   | 5,163                                | 4,811   | Fasting glucose, HbA1c      | Yes                                         | Lab                                                                    | Lab   | 5     |
| 137 | China        | 2009       | Qingdao Diabetes Cohort Study                                                                 | Community                   | both                  | 37-78                                 | 37-78 | 1,528                                | 979     | Fasting glucose, HbA1c      | Yes                                         | Lab                                                                    | Lab   |       |
| 138 | China        | 2009-2010  | China National Survey of Chronic Kidney Disease                                               | National                    | both                  | 18+                                   | 18+   | 23,341                               | 16,611  | Fasting glucose             | Yes                                         | Lab                                                                    |       |       |
| 139 | China        | 2010       | China Noncommunicable Disease Surveillance                                                    | National                    | rural                 | 18+                                   | 18+   | 31,297                               | 27,369  | Fasting glucose, HbA1c      | Yes                                         | Lab                                                                    | Lab   |       |
| 140 | China        | 2010       | China Noncommunicable Disease Surveillance                                                    | National                    | urban                 | 18+                                   | 18+   | 21,279                               | 16,973  | Fasting glucose, HbA1c      | Yes                                         | Lab                                                                    | Lab   |       |
| 141 | China        | 2011       | Beijing Eye Study                                                                             | Community                   | both                  | 50+                                   | 50+   | 1,963                                | 1,505   | Fasting glucose             | Yes                                         | Lab                                                                    |       |       |
| 142 | China        | 2011-2012  | China Health and Retirement Longitudinal Study (CHARLS), baseline survey                      | National                    | both                  | 45+                                   | 45+   | 7,083                                | 6,425   | Fasting glucose, HbA1c      | Yes                                         | Lab                                                                    | Lab   |       |
| 143 | China        | 2011-2012  | Chinese Longitudinal Healthy Longevity Survey                                                 | Subnational                 | both                  | 65+                                   | 65+   | 1,123                                | 944     | Fasting glucose             | No                                          | Lab                                                                    |       | 4     |
| 144 | China        | 2010-2013  | China National Nutrition and Health Survey                                                    | National                    | both                  | 18+                                   | 18+   | 65,491                               | 50,394  | Fasting glucose             | No                                          | Lab                                                                    |       |       |
| 145 | China        | 2014       | Chinese Longitudinal Healthy Longevity Survey                                                 | Subnational                 | both                  | 65+                                   | 65+   | 1,219                                | 1,022   | Fasting glucose             | No                                          | Lab                                                                    |       | 4     |
| 146 | China        | 2015       | China Adult Chronic Disease and Nutrition Surveillance                                        | National                    | both                  | 18+                                   | 18+   | 64,059                               | 56,354  | Fasting glucose, HbA1c      | No                                          | Lab                                                                    | Lab   |       |
| 147 | China        | 2013-2017  | Children of 1997 Birth Cohort- Biobank Clinical Follow-up                                     | Community                   | both                  | 18-20                                 | 18-20 | 250                                  | 255     | Fasting glucose, HbA1c      | No                                          | Lab                                                                    | Lab   |       |
| 148 | China        | 2015-2017  | Henan Rural Cohort                                                                            | Subnational                 | rural                 | 18-79                                 | 18-79 | 23,721                               | 15,488  | Fasting glucose             | Yes                                         | Lab                                                                    |       |       |
| 149 | China        | 2015-2016  | INTERMAP China Prospective (ICP) Study                                                        | Subnational                 | rural                 | 40-79                                 | 40-79 | 433                                  | 348     | Fasting glucose             | Yes                                         | Unknown                                                                |       |       |
| 150 | China        | 2016-2018  | The FAMILY Cohort                                                                             | Community                   | urban                 | 18+                                   | 18+   | 1,118                                | 842     | HbA1c                       | Yes                                         |                                                                        | Lab   |       |
| 151 | China        | 2018       | Chinese Longitudinal Healthy Longevity Survey                                                 | Subnational                 | both                  | 65+                                   | 65+   | 7,771                                | 6,191   | Fasting glucose             | Yes                                         | Lab                                                                    |       | 6     |
| 152 | Colombia     | 2001       | CINDI/CARMEN-Bucaramanga; Bautista et al., Eur J Cardiovasc Prev Rehabil 13:769-75, 2006      | Community                   | urban                 | 25-64                                 | 25-64 | 1,217                                | 622     | Fasting glucose             | No                                          | Unknown                                                                |       |       |
| 153 | Colombia     | 2004-2005  | CArdiovascular Risk factors Multiple Evaluation in Latin America (CARMELA)                    | Community                   | urban                 | 25-64                                 | 25-64 | 815                                  | 738     | Fasting glucose             | Yes                                         | Lab                                                                    |       |       |
| 154 | Colombia     | 2007       | Encuesta Nacional de Salud                                                                    | National                    | both                  | 18-69                                 | 18-69 | 7,637                                | 5,348   | Fasting glucose             | Yes                                         | Portable                                                               |       |       |
| 155 | Colombia     | 2010       | STEPS                                                                                         | Subnational                 | urban                 | 18-64                                 | 18-64 | 1,239                                | 924     | Fasting glucose             | Yes                                         | Portable                                                               |       |       |
| 156 | Colombia     | 2015       | STEPS                                                                                         | Subnational                 | both                  | 18-64                                 | 18-64 | 1,142                                | 868     | Fasting glucose             | Yes                                         | Portable                                                               |       |       |
| 157 | Colombia     | 2016       | The Survey on Health, Well-Being, and Aging in Latin America and the Caribbean (SABE)         | National                    | both                  | 60+                                   | 60+   | 13,582                               | 10,112  | Fasting glucose             | Yes                                         | Lab                                                                    |       |       |
| 158 | Comoros      | 2011       | STEPS                                                                                         | National                    | both                  | 25-64                                 | 25-64 | 3,639                                | 1,584   | Fasting glucose             | Yes                                         | Unknown                                                                |       |       |
| 159 | Congo        | 2019       | Diabetes prevalence and risk factors                                                          | Community                   | rural                 | 19+                                   | 19+   | 797                                  | 709     | Fasting glucose             | Yes                                         | Portable                                                               |       |       |
| 160 | Cook Islands | 2013-2015  | STEPS                                                                                         | National                    | both                  | 18-64                                 | 18-64 | 630                                  | 622     | Fasting glucose             | Yes                                         | Portable                                                               |       |       |
| 161 | Cook Islands | 2022       | STEPS                                                                                         | National                    | both                  | 18-69                                 | 18-69 | 718                                  | 692     | Fasting glucose             | Yes                                         | Portable                                                               |       |       |
| 162 | Costa Rica   | 1988       | Campos et al., Circulation 85:648-58, 1992                                                    | Community                   | rural                 | 20-65                                 | 20-65 | 123                                  | 111     | Fasting glucose             | No                                          | Unknown                                                                |       |       |
| 163 | Costa Rica   | 1988       | Campos et al., Circulation 85:648-58, 1992                                                    | Community                   | urban                 | 20-65                                 | 20-65 | 120                                  | 111     | Fasting glucose             | No                                          | Unknown                                                                |       |       |
| 164 | Costa Rica   | 2000       | Ministerio de Salud, 2003                                                                     | Community                   | urban                 | 25-64                                 | 25-64 | 636                                  | 330     | Fasting glucose             | No                                          | Unknown                                                                |       |       |
| 165 | Costa Rica   | 2004       | CAMDI                                                                                         | Community                   | urban                 | 20+                                   | 20+   | 756                                  | 390     | Fasting glucose             | Yes                                         | Lab                                                                    |       |       |
| 166 | Costa Rica   | 2004-2006  | Costa Rican Longevity and Healthy Aging Study Pre-1945 Cohort Wave 1                          | National                    | both                  | 60+                                   | 60+   | 1,534                                | 1,293   | Fasting glucose, HbA1c      | Yes                                         | Lab                                                                    | Lab   |       |
| 167 | Costa Rica   | 2006-2008  | Costa Rican Longevity and Healthy Aging Study Pre-1945 Cohort Wave 2                          | National                    | both                  | 62+                                   | 62+   | 1,286                                | 1,075   | Fasting glucose, HbA1c      | Yes                                         | Lab                                                                    | Lab   |       |
| 168 | Costa Rica   | 2010       | Costa Rican National Cardiovascular Risk Factors Survey, 2010                                 | National                    | both                  | 20+                                   | 20+   | 2,571                                | 992     | Fasting glucose             | Yes                                         | Lab                                                                    |       |       |
| 169 | Costa Rica   | 2010-2011  | Costa Rican Longevity and Healthy Aging Study 1945-1955 Cohort Wave 1                         | National                    | both                  | 54-66                                 | 54-66 | 1,688                                | 1,077   | HbA1c                       | Yes                                         |                                                                        | Lab   |       |
| 170 | Costa Rica   | 2014       | Costa Rican National Cardiovascular Risk Factors Survey, 2014                                 | National                    | both                  | 20+                                   | 20+   | 2,126                                | 954     | Fasting glucose             | Yes                                         | Lab                                                                    |       |       |
| 171 | Costa Rica   | 2018       | Costa Rican National Cardiovascular Risk Factors Survey, 2018                                 | National                    | both                  | 20+                                   | 20+   | 2,291                                | 1,286   | Fasting glucose             | Yes                                         | Lab                                                                    |       |       |
| 172 | Croatia      | 2008       | Endemic Nephropathy and Arterial hypertension (ENAH)                                          | Subnational                 | rural                 | 18+                                   | 18+   | 649                                  | 502     | Fasting glucose             | Yes                                         | Lab                                                                    |       |       |
| 173 | Croatia      | 2010       | Endemic Nephropathy and Arterial hypertension (ENAH)                                          | Subnational                 | rural                 | 18+                                   | 18+   | 401                                  | 299     | Fasting glucose             | Yes                                         | Lab                                                                    |       |       |
| 174 | Croatia      | 2015       | Endemic Nephropathy and Arterial hypertension (ENAH) Follow-up Study                          | Subnational                 | rural                 | 18+                                   | 18+   | 464                                  | 225     | Fasting glucose             | Yes                                         | Lab                                                                    |       |       |
| 175 | Croatia      | 2018-2021  | Epidemiology of arterial hypertension in Croatia (EH-UH)                                      | National                    | both                  | 18+                                   | 18+   | 738                                  | 474     | Fasting glucose             | Yes                                         | Lab                                                                    |       |       |
| 176 | Cuba         | 2010       | National Survey on Risk Factors and Chronic Diseases (NSRFCD)                                 | National                    | both                  | 18+                                   | 18+   | 4,036                                | 3,558   | Fasting glucose             | Yes                                         | Lab                                                                    |       |       |
| 177 | Cuba         | 2010-2011  | Noncommunicable disease risk factors in Cienfuegos                                            | Community                   | urban                 | 18-74                                 | 18-74 | 841                                  | 587     | Fasting glucose             | Yes                                         | Lab                                                                    |       |       |
| 178 | Cuba         | 2018-2020  | Encuesta nacional de salud Cuba 2018-2022 (ENS)                                               | National                    | both                  | 18+                                   | 18+   | 3,219                                | 2,057   | Fasting glucose             | Yes                                         | Lab                                                                    |       |       |
| 179 | Czechia      | 1981       | Machova et al., Cas Lek Cesk 143:90-3, 2004; Site 1                                           | Subnational                 | rural                 | 25+                                   | 25+   | 11,004                               | 9,189   | Fasting glucose             | No                                          | Unknown                                                                |       |       |
| 180 | Czechia      | 1981       | Machova et al., Cas Lek Cesk 143:90-3, 2004; Site 2                                           | Subnational                 | rural                 | 25+                                   | 25+   | 11,004                               | 9,189   | Fasting glucose             | No                                          | Unknown                                                                |       |       |
| 181 | Czechia      | 1997-1998  | Czech post-MONICA                                                                             | National                    | both                  | 25-64                                 | 25-64 | 1,664                                | 1,529   | Fasting glucose             | Yes                                         | Lab                                                                    |       |       |
| 182 | Czechia      | 2000-2001  | Czech post-MONICA                                                                             | National                    | both                  | 25-64                                 | 25-64 | 1,755                                | 1,686   | Fasting glucose             | Yes                                         | Lab                                                                    |       |       |
| 183 | Czechia      | 2002-2005  | Health, Alcohol and Psychosocial Factors In Eastern Europe                                    | Subnational                 | urban                 | 45-70                                 | 45-70 | 4,665                                | 4,060   | Fasting glucose, HbA1c      | Yes                                         | Lab                                                                    | Lab   |       |
| 184 | Czechia      | 2006-2009  | Czech post-MONICA                                                                             | National                    | both                  | 25-64                                 | 25-64 | 1,840                                | 1,679   | Fasting glucose             | Yes                                         | Lab                                                                    |       |       |
| 185 | Czechia      | 2014-2015  | European Health Examination Survey                                                            | National                    | both                  | 25-64                                 | 25-64 | 691                                  | 473     | HbA1c                       | Yes                                         |                                                                        | Lab   |       |
| 186 | Czechia      | 2015-2018  | Czech post-MONICA                                                                             | National                    | both                  | 25-64                                 | 25-64 | 1,338                                | 1,215   | Fasting glucose, HbA1c      | Yes                                         | Lab                                                                    | Lab   |       |
| 187 | Czechia      | 2019-2020  | European Health Examination Survey                                                            | National                    | both                  | 25-64                                 | 25-64 | 628                                  | 426     | HbA1c                       | Yes                                         |                                                                        | Lab   |       |
| 188 | Czechia      | 2019-2022  | CELSPAC: YA (The Central European Longitudinal Studies of Parents and Children: Young Adults) | Community                   | both                  | 27-30                                 | 27-30 | 151                                  | 138     | Fasting glucose             | No                                          | Lab                                                                    |       |       |
| 189 | Denmark      | 2007-2008  | The Danish Health Examination Survey 2007-2008                                                | National                    | both                  | 18+                                   | 18+   | 10,334                               | 7,089   | HbA1c                       | Yes                                         |                                                                        | Lab   |       |
| 190 | Denmark      | 2009-2010  | European Youth Heart Study                                                                    | Community                   | both                  | 18-28                                 | 18-28 | 333                                  | 305     | Fasting glucose             | Yes                                         | Lab                                                                    |       |       |
| 191 | Denmark      | 2016       | Copenhagen General Population Study                                                           | Subnational                 | urban                 | 20-90                                 | 20-90 | 5,031                                | 4,148   | HbA1c                       | Yes                                         |                                                                        | Lab   |       |
| 192 | Denmark      | 2017       | Copenhagen General Population Study                                                           | Subnational                 | urban                 | 20-90                                 | 20-90 | 4,519                                | 3,282   | HbA1c                       | Yes                                         |                                                                        | Lab   |       |

|     | Country            | Data years | Survey/Study name/Citation                                                                                     | Level of representativeness | Rural, urban, or both | Age range as used for global analysis |       | Sample size used for global analysis |        | Glycaemic markers available | Information available on diabetes treatment | Whether measured in a laboratory or by a point-of-care portable device |          | Notes |
|-----|--------------------|------------|----------------------------------------------------------------------------------------------------------------|-----------------------------|-----------------------|---------------------------------------|-------|--------------------------------------|--------|-----------------------------|---------------------------------------------|------------------------------------------------------------------------|----------|-------|
|     |                    |            |                                                                                                                |                             |                       | Female                                | Male  | Female                               | Male   |                             |                                             | Glucose                                                                | HbA1c    |       |
| 193 | Denmark            | 2018       | Copenhagen General Population Study                                                                            | Subnational                 | urban                 | 20-90                                 | 20-90 | 4,018                                | 3,042  | HbA1c                       | Yes                                         |                                                                        | Lab      |       |
| 194 | Denmark            | 2019       | Copenhagen General Population Study                                                                            | Subnational                 | urban                 | 20-90                                 | 20-90 | 1,635                                | 1,324  | HbA1c                       | Yes                                         |                                                                        | Lab      |       |
| 195 | Denmark            | 2020-2021  | Copenhagen General Population Study                                                                            | Subnational                 | urban                 | 20-90                                 | 20-90 | 1,205                                | 1,066  | HbA1c                       | Yes                                         |                                                                        | Lab      |       |
| 196 | Denmark            | 2022-2023  | Copenhagen General Population Study                                                                            | Subnational                 | urban                 | 20-90                                 | 20-90 | 4,047                                | 3,551  | HbA1c                       | Yes                                         |                                                                        | Lab      |       |
| 197 | Dominica           | 2007-2008  | STEPS                                                                                                          | National                    | both                  | 18-64                                 | 18-64 | 531                                  | 430    | Fasting glucose             | Yes                                         | Unknown                                                                |          |       |
| 198 | Dominican Republic | 1996-1998  | Estudio factores de riesgo cardiovascular y síndrome metabólico en la República Dominicana I (EFRICARD I)      | National                    | both                  | 18-75                                 | 18-75 | 4,097                                | 2,087  | Fasting glucose             | Yes                                         | Lab                                                                    |          |       |
| 199 | Dominican Republic | 2010-2012  | Estudio factores de riesgo cardiovascular y síndrome metabólico en la República Dominicana II (EFRICARD II)    | National                    | both                  | 18-75                                 | 18-75 | 3,318                                | 1,658  | Fasting glucose             | Yes                                         | Lab                                                                    |          |       |
| 200 | DR Congo           | 2007       | Diabetes and intermediate hyperglycaemia in Kisantu, DR Congo: a cross-sectional prevalence study              | Community                   | urban                 | 20+                                   | 20+   | 1,197                                | 666    | Fasting glucose             | Yes                                         | Portable                                                               |          |       |
| 201 | DR Congo           | 2016-2017  | Prevalence and Risk Factors of CKD in South Kivu, Democratic Republic of Congo: A Large-Scale Population Study | Subnational                 | both                  | 18+                                   | 18+   | 802                                  | 515    | Fasting glucose             | Yes                                         | Portable                                                               |          |       |
| 202 | Ecuador            | 2004-2005  | Cardiovascular Risk factors Multiple Evaluation in Latin America (CARMELA)                                     | Community                   | urban                 | 25-64                                 | 25-64 | 825                                  | 813    | Fasting glucose             | Yes                                         | Lab                                                                    |          |       |
| 203 | Ecuador            | 2009-2010  | The Survey on Health, Well-Being, and Aging in Latin America and the Caribbean (SABE)                          | National                    | both                  | 60+                                   | 60+   | 2,706                                | 2,426  | Fasting glucose             | Yes                                         | Unknown                                                                |          |       |
| 204 | Ecuador            | 2011-2013  | Encuesta Nacional de Salud y Nutrición (ENSANUT)                                                               | National                    | both                  | 18-59                                 | 18-59 | 8,068                                | 3,690  | Fasting glucose             | No                                          | Lab                                                                    |          |       |
| 205 | Ecuador            | 2018       | STEPS                                                                                                          | National                    | both                  | 18-69                                 | 18-69 | 2,632                                | 1,944  | Fasting glucose             | Yes                                         | Portable                                                               |          |       |
| 206 | Egypt              | 1995       | Herman et al., Diabet Med 12:1126-31, 1995                                                                     | Community                   | urban                 | 20-79                                 | 20-79 | 425                                  | 604    | Fasting glucose             | No                                          | Unknown                                                                |          |       |
| 207 | Egypt              | 2003-2004  | Marzouk et al., Gut 56(8):1105-10, 2007                                                                        | Community                   | rural                 | 25+                                   | 25+   | 455                                  | 321    | Fasting glucose             | Yes                                         | Lab                                                                    |          |       |
| 208 | Egypt              | 2005       | STEPS                                                                                                          | National                    | both                  | 18-65                                 | 18-65 | 3,923                                | 4,164  | Fasting glucose             | Yes                                         | Lab                                                                    |          |       |
| 209 | Egypt              | 2007-2009  | Mostafa et al., Gut 59(8):1135-40, 2010                                                                        | Community                   | rural                 | 35+                                   | 35+   | 846                                  | 642    | Fasting glucose             | Yes                                         | Lab                                                                    |          |       |
| 210 | Egypt              | 2011       | STEPS                                                                                                          | National                    | both                  | 18-65                                 | 18-65 | 2,959                                | 1,740  | Fasting glucose             | Yes                                         | Unknown                                                                |          |       |
| 211 | Egypt              | 2017       | STEPS                                                                                                          | National                    | both                  | 18-69                                 | 18-69 | 3,669                                | 2,094  | Fasting glucose             | Yes                                         | Portable                                                               |          |       |
| 212 | El Salvador        | 2004       | CAMDI                                                                                                          | Community                   | urban                 | 20+                                   | 20+   | 822                                  | 405    | Fasting glucose             | Yes                                         | Lab                                                                    |          |       |
| 213 | El Salvador        | 2014-2015  | Encuesta Nacional de Enfermedades Crónicas (ENECA-ELS)                                                         | National                    | both                  | 20+                                   | 20+   | 2,964                                | 1,703  | Fasting glucose             | Yes                                         | Lab                                                                    |          |       |
| 214 | Eritrea            | 2010       | STEPS                                                                                                          | National                    | both                  | 25-74                                 | 25-74 | 4,309                                | 1,725  | Fasting glucose             | Yes                                         | Portable                                                               |          |       |
| 215 | Estonia            | 1997       | SWESTONIA; Johansson et al., J Intern Med 252:551-60, 2002                                                     | Community                   | urban                 | 35-55                                 | 35-55 | 133                                  | 144    | Fasting glucose             | No                                          | Unknown                                                                |          |       |
| 216 | Estonia            | 2003       | The European Male Ageing Study                                                                                 | Community                   | both                  |                                       | 40+   |                                      | 428    | Fasting glucose             | Yes                                         | Lab                                                                    |          |       |
| 217 | Estonia            | 2008       | The European Male Ageing Study                                                                                 | Community                   | both                  |                                       | 45+   |                                      | 327    | Fasting glucose             | Yes                                         | Lab                                                                    |          |       |
| 218 | Eswatini           | 2014       | STEPS                                                                                                          | National                    | both                  | 18-69                                 | 18-69 | 1,925                                | 1,016  | Fasting glucose             | Yes                                         | Portable                                                               |          |       |
| 219 | Ethiopia           | 2015       | STEPS                                                                                                          | National                    | both                  | 18-69                                 | 18-69 | 5,127                                | 3,752  | Fasting glucose             | Yes                                         | Portable                                                               |          |       |
| 220 | Fiji               | 1980       | National Cardiovascular and Diabetes Survey (NCVDS)                                                            | Subnational                 | both                  | 20+                                   | 20+   | 1,523                                | 1,449  | Fasting glucose             | Yes                                         | Lab                                                                    |          |       |
| 221 | Fiji               | 2002       | STEPS                                                                                                          | National                    | both                  | 25-64                                 | 25-64 | 2,985                                | 2,055  | Fasting glucose             | Yes                                         | Portable                                                               |          |       |
| 222 | Fiji               | 2009       | Fiji Eye Health Survey 2009                                                                                    | National                    | both                  | 40+                                   | 40+   | 787                                  | 590    | HbA1c                       | Yes                                         |                                                                        | Portable |       |
| 223 | Fiji               | 2011       | STEPS                                                                                                          | National                    | both                  | 25-64                                 | 25-64 | 1,394                                | 1,096  | Fasting glucose             | Yes                                         | Portable                                                               |          |       |
| 224 | Finland            | 1984       | Tuomilehto et al., Diabetologia 29:611-5, 1986; Site 1                                                         | Subnational                 | both                  |                                       | 65-84 |                                      | 296    | Fasting glucose             | No                                          | Unknown                                                                |          |       |
| 225 | Finland            | 1984       | Tuomilehto et al., Diabetologia 29:611-5, 1986; Site 2                                                         | Subnational                 | both                  |                                       | 65-84 |                                      | 367    | Fasting glucose             | No                                          | Unknown                                                                |          |       |
| 226 | Finland            | 1984       | Finland, Italy, Netherlands, Elderly (Fine-Finland)                                                            | Community                   | rural                 |                                       | 65-84 |                                      | 715    | Fasting glucose             | Yes                                         | Lab                                                                    |          |       |
| 227 | Finland            | 1986       | Young Finns Study 1986                                                                                         | National                    | rural                 | 18-24                                 | 18-24 | 230                                  | 200    | Fasting glucose             | No                                          | Lab                                                                    |          |       |
| 228 | Finland            | 1986       | Young Finns Study 1986                                                                                         | National                    | urban                 | 18-24                                 | 18-24 | 326                                  | 253    | Fasting glucose             | No                                          | Lab                                                                    |          |       |
| 229 | Finland            | 1984-1989  | Kuopio Ischaemic Heart Disease Risk Factor Study                                                               | Subnational                 | both                  |                                       | 42-61 |                                      | 2,682  | Fasting glucose             | Yes                                         | Lab                                                                    |          |       |
| 230 | Finland            | 1989       | Finland, Italy, Netherlands, Elderly (Fine-Finland)                                                            | Community                   | rural                 |                                       | 70-89 |                                      | 450    | Fasting glucose             | No                                          | Lab                                                                    |          |       |
| 231 | Finland            | 1990-1992  | Oulu 35 Study                                                                                                  | Community                   | urban                 | 56-57                                 | 56-57 | 327                                  | 231    | Fasting glucose             | Yes                                         | Lab                                                                    |          |       |
| 232 | Finland            | 1991-1993  | Kuopio Ischaemic Heart Disease Risk Factor Study                                                               | Subnational                 | both                  |                                       | 46-65 |                                      | 1,038  | Fasting glucose             | Yes                                         | Lab                                                                    |          |       |
| 233 | Finland            | 1997       | Northern Finland Birth Cohort 1966                                                                             | Community                   | both                  | 30-31                                 | 30-31 | 256                                  | 2,631  | Fasting glucose             | Yes                                         | Lab                                                                    |          |       |
| 234 | Finland            | 1996-1998  | Oulu 35 Study                                                                                                  | Community                   | urban                 | 60-63                                 | 60-63 | 346                                  | 244    | Fasting glucose             | Yes                                         | Portable + Lab                                                         |          |       |
| 235 | Finland            | 1998-2001  | Kuopio Ischaemic Heart Disease Risk Factor Study                                                               | Subnational                 | both                  | 53-73                                 | 53-73 | 919                                  | 834    | Fasting glucose             | Yes                                         | Lab                                                                    |          |       |
| 236 | Finland            | 2000-2001  | Health 2000 Survey                                                                                             | National                    | both                  | 30+                                   | 30+   | 3,889                                | 3,159  | Fasting glucose, HbA1c      | Yes                                         | Lab                                                                    | Lab      |       |
| 237 | Finland            | 2001       | Young Finns Study 2001                                                                                         | National                    | rural                 | 24-39                                 | 24-39 | 395                                  | 344    | Fasting glucose             | No                                          | Lab                                                                    |          |       |
| 238 | Finland            | 2001       | Young Finns Study 2001                                                                                         | National                    | urban                 | 24-39                                 | 24-39 | 770                                  | 660    | Fasting glucose             | No                                          | Lab                                                                    |          |       |
| 239 | Finland            | 2001-2003  | Oulu 45 Study                                                                                                  | Community                   | urban                 | 55-58                                 | 55-58 | 550                                  | 428    | Fasting glucose             | Yes                                         | Lab                                                                    |          |       |
| 240 | Finland            | 2001-2004  | Helsinki Birth Cohort Study                                                                                    | Community                   | urban                 | 56-69                                 | 56-69 | 1,075                                | 928    | Fasting glucose             | Yes                                         | Lab                                                                    |          |       |
| 241 | Finland            | 2005       | Mantyselka et al., Rheumatology (Oxford) 47:1235-8, 2008                                                       | Community                   | rural                 | 30-65                                 | 30-65 | 250                                  | 229    | Fasting glucose             | No                                          | Unknown                                                                |          |       |
| 242 | Finland            | 2005-2008  | Kuopio Ischaemic Heart Disease Risk Factor Study                                                               | Subnational                 | both                  | 60-81                                 | 60-81 | 634                                  | 1,241  | Fasting glucose             | Yes                                         | Lab                                                                    |          |       |
| 243 | Finland            | 2007       | Oulu 35 Study                                                                                                  | Community                   | urban                 | 71-73                                 | 71-73 | 272                                  | 184    | Fasting glucose             | Yes                                         | Lab                                                                    |          |       |
| 244 | Finland            | 2007       | Young Finns Study 2007                                                                                         | National                    | rural                 | 30-45                                 | 30-45 | 448                                  | 384    | Fasting glucose             | Yes                                         | Lab                                                                    |          |       |
| 245 | Finland            | 2007       | Young Finns Study 2007                                                                                         | National                    | urban                 | 30-45                                 | 30-45 | 728                                  | 603    | Fasting glucose             | Yes                                         | Lab                                                                    |          |       |
| 246 | Finland            | 2008       | Control group for Finnish male former elite athletes                                                           | National                    | both                  |                                       | 61+   |                                      | 207    | Fasting glucose             | Yes                                         | Lab                                                                    |          |       |
| 247 | Finland            | 2007-2008  | Savitaipale Study, 10-year Follow-up                                                                           | Community                   | rural                 | 51-75                                 | 51-75 | 358                                  | 259    | Fasting glucose             | Yes                                         | Portable                                                               |          |       |
| 248 | Finland            | 2011       | Young Finns Study 2011                                                                                         | National                    | rural                 | 34-49                                 | 34-49 | 436                                  | 368    | Fasting glucose, HbA1c      | Yes                                         | Lab                                                                    | Lab      |       |
| 249 | Finland            | 2011       | Young Finns Study 2011                                                                                         | National                    | urban                 | 34-49                                 | 34-49 | 650                                  | 513    | Fasting glucose, HbA1c      | Yes                                         | Lab                                                                    | Lab      |       |
| 250 | Finland            | 2011-2012  | Health 2011 Survey                                                                                             | National                    | both                  | 30+                                   | 30+   | 2,819                                | 2,288  | Fasting glucose, HbA1c      | Yes                                         | Lab                                                                    | Lab      |       |
| 251 | Finland            | 2012       | Northern Finland Birth Cohort 1966                                                                             | Community                   | both                  | 45-47                                 | 45-47 | 2,843                                | 2,206  | Fasting glucose, HbA1c      | Yes                                         | Lab                                                                    | Lab      |       |
| 252 | Finland            | 2017       | The FinHealth Survey                                                                                           | National                    | both                  | 18+                                   | 18+   | 3,627                                | 3,209  | Fasting glucose, HbA1c      | Yes                                         | Lab                                                                    | Lab      |       |
| 253 | Finland            | 2018-2019  | Savitaipale Study, 22-year Follow-up                                                                           | Community                   | rural                 | 62-86                                 | 62-86 | 320                                  | 243    | Fasting glucose, HbA1c      | Yes                                         | Lab                                                                    | Lab      |       |
| 254 | Finland            | 2018-2020  | Young Finns Study: Follow-up                                                                                   | National                    | both                  | 18+                                   | 18+   | 2,953                                | 2,138  | Fasting glucose, HbA1c      | Yes                                         | Lab                                                                    | Lab      |       |
| 255 | Finland            | 2019-2020  | Northern Finland Birth Cohort 1986                                                                             | Community                   | both                  | 33-35                                 | 33-35 | 918                                  | 581    | Fasting glucose, HbA1c      | Yes                                         | Lab                                                                    | Lab      |       |
| 256 | France             | 1996       | POLA Study; Defay et al., Int J Obes Relat Metab Disord 25:512-8, 2001                                         | Community                   | both                  | 60+                                   | 60+   | 1,419                                | 1,113  | Fasting glucose             | No                                          | Unknown                                                                |          |       |
| 257 | France             | 1996       | Asmar et al., J Hypertens 19:1727-32, 2001                                                                     | Subnational                 | both                  | 18+                                   | 18+   | 31,416                               | 29,692 | Fasting glucose             | No                                          | Unknown                                                                |          |       |

|     | Country          | Data years | Survey/Study name/Citation                                                                                                                        | Level of representativeness | Rural, urban, or both | Age range as used for global analysis |       | Sample size used for global analysis |        | Glycaemic markers available | Information available on diabetes treatment | Whether measured in a laboratory or by a point-of-care portable device |          | Notes |
|-----|------------------|------------|---------------------------------------------------------------------------------------------------------------------------------------------------|-----------------------------|-----------------------|---------------------------------------|-------|--------------------------------------|--------|-----------------------------|---------------------------------------------|------------------------------------------------------------------------|----------|-------|
|     |                  |            |                                                                                                                                                   |                             |                       | Female                                | Male  | Female                               | Male   |                             |                                             | Glucose                                                                | HbA1c    |       |
| 258 | France           | 1999-2001  | The Three City Study                                                                                                                              | Community                   | urban                 | 65+                                   | 65+   | 5,644                                | 3,650  | Fasting glucose             | Yes                                         | Lab                                                                    |          |       |
| 259 | France           | 2003-2005  | The Three City Study                                                                                                                              | Community                   | urban                 | 68+                                   | 68+   | 4,435                                | 2,712  | Fasting glucose             | Yes                                         | Lab                                                                    |          |       |
| 260 | France           | 2006-2007  | Etude Nationale Nutrition Santé                                                                                                                   | National                    | both                  | 18-74                                 | 18-74 | 1,379                                | 824    | Fasting glucose             | Yes                                         | Lab                                                                    | 7        |       |
| 261 | France           | 2008-2010  | The Three City Study                                                                                                                              | Community                   | urban                 | 73+                                   | 73+   | 3,024                                | 1,666  | Fasting glucose, HbA1c      | Yes                                         | Lab                                                                    | Lab      |       |
| 262 | France           | 2011-2013  | Enquête Littorale Souffle Air Biologie Environnement (ELISABET) Dunkerque                                                                         | Community                   | urban                 | 40-64                                 | 40-64 | 779                                  | 751    | Fasting glucose, HbA1c      | Yes                                         | Lab                                                                    | Lab      |       |
| 263 | France           | 2011-2013  | Enquête Littorale Souffle Air Biologie Environnement (ELISABET) Lille                                                                             | Community                   | urban                 | 40-64                                 | 40-64 | 838                                  | 754    | Fasting glucose, HbA1c      | Yes                                         | Lab                                                                    | Lab      |       |
| 264 | France           | 2012-2014  | Cohorte des consultants des Centres d'exams de santé (CONSTANCES)                                                                                 | National                    | urban                 | 18-69                                 | 18-69 | 25,538                               | 22,367 | Fasting glucose             | Yes                                         | Lab                                                                    |          |       |
| 265 | France           | 2014-2016  | L'Etude de Santé sur l'Environnement, la Biosurveillance, l'Activité physique et la Nutrition (Etude Esteban)                                     | National                    | both                  | 18-74                                 | 18-74 | 1,268                                | 992    | Fasting glucose             | Yes                                         | Lab                                                                    | 8        |       |
| 266 | France           | 2015-2017  | Cohorte des consultants des Centres d'exams de santé (CONSTANCES)                                                                                 | National                    | urban                 | 18-69                                 | 18-69 | 50,369                               | 44,390 | Fasting glucose             | Yes                                         | Lab                                                                    |          |       |
| 267 | France           | 2017-2019  | Cohorte des consultants des Centres d'exams de santé (CONSTANCES)                                                                                 | Subnational                 | urban                 | 22-76                                 | 22-76 | 8,552                                | 7,703  | Fasting glucose             | Yes                                         | Lab                                                                    |          |       |
| 268 | France           | 2018-2019  | Cohorte des consultants des Centres d'exams de santé (CONSTANCES)                                                                                 | National                    | urban                 | 18-69                                 | 18-69 | 26,699                               | 23,288 | Fasting glucose             | Yes                                         | Lab                                                                    |          |       |
| 269 | France           | 2020-2021  | Cohorte des consultants des Centres d'exams de santé (CONSTANCES)                                                                                 | Subnational                 | urban                 | 18-69                                 | 18-69 | 1,635                                | 1,344  | Fasting glucose             | Yes                                         | Lab                                                                    |          |       |
| 270 | France           | 2020-2022  | Cohorte des consultants des Centres d'exams de santé (CONSTANCES)                                                                                 | Subnational                 | urban                 | 22-80                                 | 22-80 | 19,004                               | 17,393 | Fasting glucose             | Yes                                         | Lab                                                                    |          |       |
| 271 | French Polynesia | 2010       | STEPS                                                                                                                                             | National                    | both                  | 18-64                                 | 18-64 | 1,267                                | 950    | Fasting glucose             | No                                          | Portable                                                               |          |       |
| 272 | Gambia           | 2018       | The Gambia Micronutrient Survey (GMNS)                                                                                                            | National                    | both                  | 18-49                                 |       | 1,192                                |        | HbA1c                       | No                                          |                                                                        | Portable |       |
| 273 | Georgia          | 2010       | STEPS                                                                                                                                             | National                    | both                  | 18-64                                 | 18-64 | 4,499                                | 1,870  | Fasting glucose             | Yes                                         | Portable                                                               |          |       |
| 274 | Georgia          | 2016       | STEPS                                                                                                                                             | National                    | both                  | 18-69                                 | 18-69 | 2,887                                | 1,271  | Fasting glucose             | Yes                                         | Portable                                                               |          |       |
| 275 | Germany          | 2000-2002  | Epidemiological study of the chances of prevention, early recognition and optimal treatment of chronic diseases in an elderly population (ESTHER) | Subnational                 | both                  | 50-75                                 | 50-75 | 5,418                                | 4,436  | Fasting glucose, HbA1c      | Yes                                         | Lab                                                                    | Lab      |       |
| 276 | Germany          | 2002       | Echinococcus Multilocularis and Internal Diseases in Leutkirch                                                                                    | Community                   | urban                 | 18-65                                 | 18-65 | 964                                  | 875    | HbA1c                       | Yes                                         | Lab                                                                    | Lab      |       |
| 277 | Germany          | 2000-2003  | Heinz Nixdorf Recall Study                                                                                                                        | Subnational                 | urban                 | 45-75                                 | 45-75 | 2,273                                | 2,223  | Fasting glucose, HbA1c      | Yes                                         | Lab                                                                    | Lab      |       |
| 278 | Germany          | 2002-2006  | Study of Health in Pomerania (SHIP-START-1) 5-year follow-up                                                                                      | Subnational                 | both                  | 25-85                                 | 25-85 | 1,674                                | 1,568  | HbA1c                       | No                                          | Lab                                                                    | 10       |       |
| 279 | Germany          | 2005-2008  | Heinz Nixdorf Recall Study                                                                                                                        | Subnational                 | both                  | 50-80                                 | 50-80 | 2,103                                | 2,054  | Fasting glucose, HbA1c      | Yes                                         | Lab                                                                    | Lab      |       |
| 280 | Germany          | 2008-2011  | Epidemiological study of the chances of prevention, early recognition and optimal treatment of chronic diseases in an elderly population (ESTHER) | Subnational                 | both                  | 58-84                                 | 58-84 | 3,267                                | 2,655  | HbA1c                       | Yes                                         | Lab                                                                    |          |       |
| 281 | Germany          | 2008-2011  | German Health Interview and Examination Survey for Adults 2008-11 (DEGS1)                                                                         | National                    | both                  | 18-79                                 | 18-79 | 3,549                                | 3,280  | HbA1c                       | Yes                                         | Lab                                                                    |          |       |
| 282 | Germany          | 2008-2012  | Study of Health in Pomerania (SHIP-START-2) 11-year follow-up                                                                                     | Subnational                 | both                  | 31-81                                 | 31-81 | 1,198                                | 1,052  | HbA1c                       | No                                          | Lab                                                                    | 10       |       |
| 283 | Germany          | 2008-2012  | Study of Health in Pomerania, second cohort (SHIP-TREND-0)                                                                                        | Subnational                 | both                  | 20-79                                 | 20-79 | 2,229                                | 2,096  | Fasting glucose, HbA1c      | Yes                                         | Lab                                                                    | Lab      |       |
| 284 | Germany          | 2011-2014  | Heinz Nixdorf Recall Study                                                                                                                        | Subnational                 | both                  | 56-85                                 | 56-85 | 1,573                                | 1,504  | Fasting glucose, HbA1c      | Yes                                         | Lab                                                                    | Lab      |       |
| 285 | Germany          | 2014-2016  | Study of Health in Pomerania (SHIP-START-3) 16-year follow-up                                                                                     | Subnational                 | both                  | 37-87                                 | 37-87 | 908                                  | 776    | HbA1c                       | Yes                                         | Lab                                                                    | Lab      |       |
| 286 | Germany          | 2016-2019  | Study of Health in Pomerania, second cohort (SHIP-TREND-1) 8-year follow-up                                                                       | Subnational                 | both                  | 28-90                                 | 28-90 | 1,276                                | 1,202  | Fasting glucose, HbA1c      | Yes                                         | Lab                                                                    | Lab      |       |
| 287 | Ghana            | 2003       | Women's Health Study of Accra (WHSA-I)                                                                                                            | Community                   | urban                 | 18+                                   |       | 3,004                                |        | Fasting glucose             | Yes                                         | Lab                                                                    | Lab      |       |
| 288 | Ghana            | 2006       | STEPS                                                                                                                                             | Community                   | urban                 | 25+                                   | 25+   | 1,706                                | 887    | Fasting glucose             | Yes                                         | Portable                                                               |          |       |
| 289 | Ghana            | 2012-2014  | Research on Obesity and Diabetes among African Migrants (RODAM), control group                                                                    | Subnational                 | rural                 | 25+                                   | 25+   | 679                                  | 432    | Fasting glucose, HbA1c      | Yes                                         | Lab                                                                    | Lab      |       |
| 290 | Ghana            | 2012-2014  | Research on Obesity and Diabetes among African Migrants (RODAM), control group                                                                    | Subnational                 | urban                 | 25+                                   | 25+   | 1,033                                | 419    | Fasting glucose, HbA1c      | Yes                                         | Lab                                                                    | Lab      |       |
| 291 | Ghana            | 2023       | STEPS                                                                                                                                             | National                    | both                  | 18-69                                 | 18-69 | 3,251                                | 2,022  | Fasting glucose             | Yes                                         | Portable                                                               |          |       |
| 292 | Greece           | 2001       | Karalis et al., BMC Public Health 25:1330-6, 2007                                                                                                 | Community                   | rural                 | 25+                                   | 25+   | 103                                  | 91     | Fasting glucose             | No                                          | Unknown                                                                | 2        |       |
| 293 | Greece           | 2001-2002  | The ATTICA study                                                                                                                                  | Community                   | urban                 | 18+                                   | 18+   | 1,525                                | 1,505  | Fasting glucose             | Yes                                         | Lab                                                                    |          |       |
| 294 | Greece           | 2006       | Paliouri Study                                                                                                                                    | Community                   | rural                 | 65-94                                 | 65-94 | 71                                   | 95     | Fasting glucose             | Yes                                         | Lab                                                                    |          |       |
| 295 | Greece           | 2013-2015  | Hellenic National Nutrition and Health Survey (HNNHS)                                                                                             | Subnational                 | urban                 | 18+                                   | 18+   | 2,265                                | 1,559  | Fasting glucose             | Yes                                         | Lab                                                                    |          |       |
| 296 | Greece           | 2013-2016  | National Survey of Morbidity and Risk Factors (EMENO)                                                                                             | National                    | both                  | 18+                                   | 18+   | 3,400                                | 2,519  | Fasting glucose, HbA1c      | Yes                                         | Lab                                                                    | Lab      |       |
| 297 | Greenland        | 2005-2010  | Population Health Survey in Greenland                                                                                                             | National                    | both                  | 18+                                   | 18+   | 1,727                                | 1,356  | Fasting glucose, HbA1c      | Yes                                         | Lab                                                                    | Lab      |       |
| 298 | Greenland        | 2016-2019  | Population Health Survey in Greenland                                                                                                             | National                    | both                  | 18+                                   | 18+   | 1,053                                | 841    | Fasting glucose, HbA1c      | Yes                                         | Lab                                                                    | Lab      |       |
| 299 | Guatemala        | 2001-2002  | CAMDI                                                                                                                                             | Community                   | urban                 | 20+                                   | 20+   | 683                                  | 349    | Fasting glucose             | No                                          | Lab                                                                    |          |       |
| 300 | Guatemala        | 2003-2005  | The Institute of Nutrition of Central America and Panama Nutrition Supplementation Trial Cohort                                                   | Community                   | both                  | 25-41                                 | 25-41 | 293                                  | 242    | Fasting glucose             | Yes                                         | Portable                                                               |          |       |
| 301 | Guatemala        | 2015       | STEPS                                                                                                                                             | Subnational                 | urban                 | 18+                                   | 18+   | 1,551                                | 458    | Fasting glucose             | Yes                                         | Portable                                                               |          |       |
| 302 | Guatemala        | 2015-2017  | Nutrition on early childhood and metabolomic and cardiometabolic profile on adulthood (META)                                                      | Community                   | both                  | 37-55                                 | 37-55 | 302                                  | 207    | Fasting glucose, HbA1c      | No                                          | Lab                                                                    | Lab      |       |
| 303 | Guatemala        | 2016       | Sistema de vigilancia Epidemiológica de Salud y Nutrición (SIVESNU)                                                                               | National                    | both                  | 18-49                                 |       | 1,341                                |        | HbA1c                       | No                                          |                                                                        | Portable |       |
| 304 | Guatemala        | 2017-2018  | Sistema de vigilancia Epidemiológica de Salud y Nutrición (SIVESNU)                                                                               | National                    | both                  | 18-49                                 |       | 1,344                                |        | HbA1c                       | No                                          |                                                                        | Lab      |       |
| 305 | Guatemala        | 2018-2019  | Population-Based Survey of Chronic Kidney Disease in Guatemala                                                                                    | Community                   | rural                 | 18+                                   | 18+   | 508                                  | 263    | HbA1c                       | No                                          |                                                                        | Lab      |       |
| 306 | Guatemala        | 2018-2019  | Sistema de vigilancia Epidemiológica de Salud y Nutrición (SIVESNU)                                                                               | National                    | both                  | 18-49                                 |       | 1,489                                |        | HbA1c                       | Yes                                         |                                                                        | Lab      |       |
| 307 | Guinea           | 2009       | STEPS                                                                                                                                             | Subnational                 | both                  | 18-64                                 | 18-64 | 1,131                                | 1,056  | Fasting glucose             | Yes                                         | Portable                                                               |          |       |
| 308 | Guyana           | 2016       | STEPS                                                                                                                                             | National                    | both                  | 18-69                                 | 18-69 | 1,585                                | 1,068  | Fasting glucose, HbA1c      | Yes                                         | Portable                                                               | Lab      |       |
| 309 | Haiti            | 2015-2016  | Haiti Health Study (Carrefour)                                                                                                                    | Community                   | urban                 | 25-65                                 | 25-65 | 685                                  | 474    | HbA1c                       | No                                          |                                                                        | Portable |       |
| 310 | Haiti            | 2015-2016  | Haiti Health Study (Thomonde)                                                                                                                     | Community                   | rural                 | 25-65                                 | 25-65 | 423                                  | 258    | HbA1c                       | Yes                                         |                                                                        | Portable |       |
| 311 | Honduras         | 2003-2004  | CAMDI                                                                                                                                             | Community                   | urban                 | 20+                                   | 20+   | 786                                  | 435    | Fasting glucose             | Yes                                         | Lab                                                                    |          |       |
| 312 | Hungary          | 1990-1998  | Siray et al., Public Health 119:437-41, 2005                                                                                                      | Community                   | both                  | 18+                                   | 18+   | 13,647                               | 10,651 | Fasting glucose             | No                                          | Lab                                                                    |          |       |
| 313 | Hungary          | 2003       | The European Male Ageing Study                                                                                                                    | Community                   | both                  |                                       | 40+   | 421                                  |        | Fasting glucose             | Yes                                         | Lab                                                                    |          |       |
| 314 | Hungary          | 2008       | The European Male Ageing Study                                                                                                                    | Community                   | both                  |                                       | 45+   | 343                                  |        | Fasting glucose             | Yes                                         | Lab                                                                    |          |       |
| 315 | Iceland          | 2002-2006  | AGES                                                                                                                                              | Subnational                 | urban                 | 66-96                                 | 66-96 | 3,324                                | 2,437  | Fasting glucose             | Yes                                         | Lab                                                                    |          |       |
| 316 | Iceland          | 2007-2011  | AGESII                                                                                                                                            | Subnational                 | urban                 | 71-98                                 | 71-98 | 1,934                                | 1,382  | Fasting glucose             | Yes                                         | Lab                                                                    |          |       |
| 317 | India            | 1988-1989  | Ramachandran et al., Diabetes Res Clin Pract 58(1):55-60, 2002                                                                                    | Community                   | urban                 | 20-74                                 | 20-74 | 408                                  | 438    | Fasting glucose             | No                                          | Portable                                                               |          |       |
| 318 | India            | 1995       | Shobana et al., Diabetes Res Clin Pract 42(3):18186, 1998                                                                                         | Community                   | urban                 | 20-74                                 | 20-74 | 710                                  | 741    | Fasting glucose             | No                                          | Portable                                                               |          |       |
| 319 | India            | 1996-1999  | Chennai Urban Population Study                                                                                                                    | Community                   | urban                 | 20+                                   | 20+   | 698                                  | 542    | Fasting glucose             | Yes                                         | Lab                                                                    |          |       |
| 320 | India            | 1999       | DECODA; DECODA Study Group, Diabetes Care 26:1770-80, 2003                                                                                        | Community                   | urban                 | 30-79                                 | 30-79 | 1,322                                | 1,297  | Fasting glucose             | No                                          | Unknown                                                                |          |       |
| 321 | India            | 2000       | Ramachandran et al., Diabet Med 20(3):220-24, 2003                                                                                                | Subnational                 | urban                 | 20-75                                 | 20-75 | 5,267                                | 4,644  | Fasting glucose             | No                                          | Portable                                                               |          |       |
| 322 | India            | 1999-2001  | Jaipur Heart Watch 2                                                                                                                              | Community                   | urban                 | 20-75                                 | 20-75 | 562                                  | 485    | Fasting glucose             | No                                          | Lab                                                                    |          |       |

|     | Country   | Data years | Survey/Study name/Citation                                                                                                                                   | Level of representativeness | Rural, urban, or both | Age range as used for global analysis |       | Sample size used for global analysis |         | Glycaemic markers available | Information available on diabetes treatment | Whether measured in a laboratory or by a point-of-care portable device |          | Notes |
|-----|-----------|------------|--------------------------------------------------------------------------------------------------------------------------------------------------------------|-----------------------------|-----------------------|---------------------------------------|-------|--------------------------------------|---------|-----------------------------|---------------------------------------------|------------------------------------------------------------------------|----------|-------|
|     |           |            |                                                                                                                                                              |                             |                       | Female                                | Male  | Female                               | Male    |                             |                                             | Glucose                                                                | HbA1c    |       |
| 323 | India     | 1998-2002  | Vellore Birth Cohort                                                                                                                                         | Subnational                 | both                  | 25-31                                 | 25-31 | 1,055                                | 1,163   | Fasting glucose             | Yes                                         | Lab                                                                    |          |       |
| 324 | India     | 1999-2002  | New Delhi Birth Cohort                                                                                                                                       | Community                   | urban                 | 26-33                                 | 26-33 | 636                                  | 881     | Fasting glucose             | Yes                                         | Lab                                                                    |          |       |
| 325 | India     | 2003       | Study in Chennai                                                                                                                                             | Community                   | rural                 | 20-79                                 | 20-79 | 575                                  | 346     | Fasting glucose             | No                                          | Unknown                                                                |          |       |
| 326 | India     | 2001-2004  | Chennai Urban Rural Epidemiology Study                                                                                                                       | Community                   | urban                 | 20+                                   | 20+   | 1,254                                | 1,096   | Fasting glucose, HbA1c      | Yes                                         | Lab                                                                    | Lab      |       |
| 327 | India     | 2003-2004  | Jaipur Heart Watch 3                                                                                                                                         | Community                   | urban                 | 20-75                                 | 20-75 | 228                                  | 212     | Fasting glucose             | Yes                                         | Lab                                                                    |          |       |
| 328 | India     | 2006       | Ramachandran et al., Diabetes Care 31(5):893-98, 2008                                                                                                        | Community                   | both                  | 20+                                   | 20+   | 3,745                                | 3,321   | Fasting glucose             | Yes                                         | Lab                                                                    |          |       |
| 329 | India     | 2005-2006  | Risk factor profile for chronic non-communicable diseases: Results of a community-based study in Kerala, India                                               | Community                   | both                  | 18-64                                 | 18-64 | 2,810                                | 2,615   | Fasting glucose             | Yes                                         | Unknown                                                                |          |       |
| 330 | India     | 2005-2006  | National Nutrition Monitoring Bureau rural survey                                                                                                            | Subnational                 | rural                 | 20+                                   | 20+   | 13,671                               | 11,901  | Fasting glucose             | Yes                                         | Portable                                                               |          |       |
| 331 | India     | 2006-2008  | Central India Eye and Medical Study                                                                                                                          | Community                   | rural                 | 30+                                   | 30+   | 2,518                                | 2,191   | HbA1c                       | Yes                                         |                                                                        | Lab      |       |
| 332 | India     | 2006-2007  | Jaipur Heart Watch 4                                                                                                                                         | Community                   | urban                 | 20-75                                 | 20-75 | 536                                  | 502     | Fasting glucose             | Yes                                         | Lab                                                                    |          |       |
| 333 | India     | 2006-2008  | Kashmiri Young Adults                                                                                                                                        | Subnational                 | both                  | 20-40                                 | 20-40 | 912                                  | 2,120   | Fasting glucose             | No                                          | Portable                                                               |          |       |
| 334 | India     | 2007-2008  | Urban population in Hyderabad                                                                                                                                | Community                   | urban                 | 20-60                                 | 20-60 | 1,552                                | 1,511   | Fasting glucose, HbA1c      | Yes                                         | Portable                                                               | Portable |       |
| 335 | India     | 2006-2009  | New Delhi Birth Cohort                                                                                                                                       | Community                   | urban                 | 33-38                                 | 33-38 | 448                                  | 652     | Fasting glucose             | Yes                                         | Lab                                                                    |          |       |
| 336 | India     | 2008-2010  | ICMR-India Diabetes (INDIAB) Study, Phase I                                                                                                                  | National                    | both                  | 20+                                   | 20+   | 6,944                                | 7,110   | Fasting glucose, HbA1c      | Yes                                         | Portable                                                               | Lab      |       |
| 337 | India     | 2009-2010  | Jaipur Heart Watch 5                                                                                                                                         | Community                   | urban                 | 20-75                                 | 20-75 | 274                                  | 429     | Fasting glucose             | Yes                                         | Lab                                                                    |          |       |
| 338 | India     | 2010-2012  | Centre for Cardiometabolic Risk Reduction in South-Asia (CARRS) - Surveillance Study                                                                         | Community                   | urban                 | 20+                                   | 20+   | 6,402                                | 5,867   | Fasting glucose, HbA1c      | Yes                                         | Lab                                                                    | Lab      | 11    |
| 339 | India     | 2011-2012  | National Nutrition Monitoring Bureau rural survey                                                                                                            | National                    | rural                 | 18+                                   | 18+   | 27,080                               | 21,937  | Fasting glucose             | Yes                                         | Lab                                                                    |          |       |
| 340 | India     | 2012-2013  | ICMR-India Diabetes (INDIAB) Study, Phase II                                                                                                                 | Subnational                 | both                  | 20+                                   | 20+   | 10,866                               | 8,252   | Fasting glucose, HbA1c      | Yes                                         | Portable                                                               | Lab      |       |
| 341 | India     | 2012-2014  | Jaipur Heart Watch 6                                                                                                                                         | Community                   | urban                 | 20-75                                 | 20-75 | 353                                  | 516     | Fasting glucose             | No                                          | Lab                                                                    |          |       |
| 342 | India     | 2012-2013  | Processed and non-processed foods - Rural sample                                                                                                             | National                    | rural                 | 18+                                   | 18+   | 2,093                                | 1,855   | Fasting glucose             | No                                          | Portable                                                               |          |       |
| 343 | India     | 2014       | Annual Health Survey: Clinical, Anthropometric and Bio-chemical                                                                                              | National                    | both                  | 18+                                   | 18+   | 449,906                              | 407,330 | Fasting glucose             | No                                          | Lab                                                                    |          |       |
| 344 | India     | 2012-2015  | ICMR-India Diabetes (INDIAB) Study, North East Phase                                                                                                         | Subnational                 | both                  | 20+                                   | 20+   | 16,682                               | 14,260  | Fasting glucose, HbA1c      | Yes                                         | Portable                                                               | Lab      |       |
| 345 | India     | 2013-2014  | Vellore Birth Cohort                                                                                                                                         | Subnational                 | both                  | 39-44                                 | 39-44 | 499                                  | 581     | Fasting glucose, HbA1c      | Yes                                         | Lab                                                                    | Lab      |       |
| 346 | India     | 2014-2015  | Control of Hypertension In Rural India (CHIRI) - Rishi Valley                                                                                                | Community                   | rural                 | 18+                                   | 18+   | 3,551                                | 2,616   | Fasting glucose, HbA1c      | Yes                                         | Portable                                                               | Portable |       |
| 347 | India     | 2015-2016  | Diet and nutritional status of urban population and prevalence of hypertension                                                                               | National                    | urban                 | 18+                                   | 18+   | 53,527                               | 39,397  | Fasting glucose             | Yes                                         | Portable                                                               |          |       |
| 348 | India     | 2017-2018  | National Noncommunicable Disease Monitoring Survey (NNMS)                                                                                                    | National                    | both                  | 18-69                                 | 18-69 | 4,666                                | 5,011   | Fasting glucose             | Yes                                         | Portable                                                               |          |       |
| 349 | India     | 2016-2017  | Secular TRends in DiabEtes in India (STRIDE-I) - Change in Prevalence in Ten Years among Urban and Rural Populations in Tamil Nadu                           | Community                   | both                  | 20+                                   | 20+   | 5,319                                | 4,527   | Fasting glucose             | Yes                                         | Portable                                                               |          |       |
| 350 | India     | 2017-2018  | ICMR-India Diabetes (INDIAB) Study, Phase III                                                                                                                | Subnational                 | both                  | 20+                                   | 20+   | 7,693                                | 7,282   | Fasting glucose, HbA1c      | Yes                                         | Portable                                                               | Lab      |       |
| 351 | India     | 2016-2019  | Vellore Birth Cohort                                                                                                                                         | Subnational                 | both                  | 43-48                                 | 43-48 | 758                                  | 843     | Fasting glucose, HbA1c      | Yes                                         | Lab                                                                    | Lab      |       |
| 352 | India     | 2018-2019  | ICMR-India Diabetes (INDIAB) Study, Phase IV                                                                                                                 | Subnational                 | both                  | 20+                                   | 20+   | 10,320                               | 9,026   | Fasting glucose, HbA1c      | Yes                                         | Portable                                                               | Lab      |       |
| 353 | India     | 2019-2020  | ICMR-India Diabetes (INDIAB) Study, Phase V                                                                                                                  | Subnational                 | both                  | 20+                                   | 20+   | 6,701                                | 6,670   | Fasting glucose, HbA1c      | Yes                                         | Portable                                                               | Lab      |       |
| 354 | India     | 2021       | STEPS, Mumbai                                                                                                                                                | Community                   | urban                 | 18-69                                 | 18-69 | 2,575                                | 2,601   | Fasting glucose             | Yes                                         | Portable                                                               |          |       |
| 355 | Indonesia | 2001       | STEPS/SURKESNAS                                                                                                                                              | Subnational                 | both                  | 25+                                   | 25+   | 2,186                                | 1,895   | Fasting glucose             | No                                          | Unknown                                                                |          |       |
| 356 | Indonesia | 2003       | A genetic-ecological study of the risk factors for lifestyle-related diseases in Oceanian populations, Study A                                               | Community                   | rural                 | 18-79                                 | 18-79 | 103                                  | 100     | Fasting glucose             | Yes                                         | Lab                                                                    |          |       |
| 357 | Indonesia | 2003       | A genetic-ecological study of the risk factors for lifestyle-related diseases in Oceanian populations, Study B                                               | Community                   | rural                 | 18-79                                 | 18-79 | 140                                  | 100     | Fasting glucose             | Yes                                         | Lab                                                                    |          |       |
| 358 | Indonesia | 2006       | NCD RFS; Soebardi et al., Acta Med Indones 41:186-90, 2009                                                                                                   | Community                   | urban                 | 25-64                                 | 25-64 | 950                                  | 641     | Fasting glucose             | No                                          | Unknown                                                                |          |       |
| 359 | Indonesia | 2018       | Indonesian Basic Health Survey (RISKESDAS) 2018                                                                                                              | National                    | both                  | 18+                                   | 18+   | 20,614                               | 14,493  | Fasting glucose             | Yes                                         | Portable                                                               |          | 12    |
| 360 | Iran      | 1994       | Sarraf-Zadegan et al., Acta Cardiol 54:257-63, 1999                                                                                                          | Community                   | urban                 | 20-69                                 | 20-69 | 1,069                                | 1,000   | Fasting glucose             | No                                          | Unknown                                                                |          |       |
| 361 | Iran      | 1999-2000  | National Health Survey II                                                                                                                                    | Subnational                 | both                  | 18+                                   | 18+   | 598                                  | 498     | Fasting glucose             | No                                          | Lab                                                                    |          |       |
| 362 | Iran      | 2001       | Report on the pilot project for community-based primary prevention of the major noncommunicable diseases in Qazvin & Abhar cities 2001; 1: Infobase 101013a2 | Community                   | urban                 | 25+                                   | 25+   | 496                                  | 471     | Fasting glucose             | No                                          | Unknown                                                                |          |       |
| 363 | Iran      | 2001       | Report on the pilot project for community-based primary prevention of the major noncommunicable diseases in Qazvin & Abhar cities 2001; Infobase 101013a1    | Community                   | urban                 | 25+                                   | 25+   | 495                                  | 489     | Fasting glucose             | No                                          | Unknown                                                                |          |       |
| 364 | Iran      | 2001       | Isfahan Healthy Heart Programme (IHHP), Arak                                                                                                                 | Community                   | rural                 | 19+                                   | 19+   | 1,091                                | 1,028   | Fasting glucose             | Yes                                         | Lab                                                                    |          |       |
| 365 | Iran      | 2001       | Isfahan Healthy Heart Programme (IHHP), Arak                                                                                                                 | Community                   | urban                 | 19+                                   | 19+   | 2,131                                | 2,089   | Fasting glucose             | Yes                                         | Lab                                                                    |          |       |
| 366 | Iran      | 2001       | Isfahan Healthy Heart Programme (IHHP), Isfahan                                                                                                              | Community                   | rural                 | 19+                                   | 19+   | 238                                  | 234     | Fasting glucose             | Yes                                         | Lab                                                                    |          |       |
| 367 | Iran      | 2001       | Isfahan Healthy Heart Programme (IHHP), Isfahan                                                                                                              | Community                   | urban                 | 19+                                   | 19+   | 1,932                                | 1,782   | Fasting glucose             | Yes                                         | Lab                                                                    |          |       |
| 368 | Iran      | 2001       | Isfahan Healthy Heart Programme (IHHP), Najaf Abad                                                                                                           | Community                   | rural                 | 19+                                   | 19+   | 419                                  | 409     | Fasting glucose             | Yes                                         | Lab                                                                    |          |       |
| 369 | Iran      | 2001       | Isfahan Healthy Heart Programme (IHHP), Najaf Abad                                                                                                           | Community                   | urban                 | 19+                                   | 19+   | 578                                  | 581     | Fasting glucose             | Yes                                         | Lab                                                                    |          |       |
| 370 | Iran      | 2004       | Azimi-Nezhad et al., Singapore Med J 49:571-6, 2008                                                                                                          | Community                   | both                  | 15+                                   | 15+   | 1,675                                | 1,585   | Fasting glucose             | No                                          | Lab                                                                    |          | 3     |
| 371 | Iran      | 2003-2004  | Childhood and Adolescence Surveillance and Prevention of Adult Noncommunicable Disease (CASPIAN)                                                             | National                    | both                  | 18                                    | 18    | 368                                  | 373     | Fasting glucose             | Yes                                         | Lab                                                                    |          |       |
| 372 | Iran      | 2003-2004  | The Persian Gulf Healthy Heart Study                                                                                                                         | Subnational                 | urban                 | 25-75                                 | 25-75 | 1,974                                | 1,741   | Fasting glucose             | Yes                                         | Lab                                                                    |          |       |
| 373 | Iran      | 2005       | STEPS                                                                                                                                                        | National                    | both                  | 25-64                                 | 25-64 | 31,782                               | 32,723  | Fasting glucose             | Yes                                         | Lab                                                                    |          |       |
| 374 | Iran      | 2007       | Isfahan Healthy Heart Programme (IHHP), Arak                                                                                                                 | Community                   | rural                 | 19+                                   | 19+   | 1,028                                | 1,030   | Fasting glucose             | Yes                                         | Lab                                                                    |          |       |
| 375 | Iran      | 2007       | Isfahan Healthy Heart Programme (IHHP), Arak                                                                                                                 | Community                   | urban                 | 19+                                   | 19+   | 1,366                                | 1,429   | Fasting glucose             | Yes                                         | Lab                                                                    |          |       |
| 376 | Iran      | 2007       | Isfahan Healthy Heart Programme (IHHP), Isfahan                                                                                                              | Community                   | rural                 | 19+                                   | 19+   | 153                                  | 158     | Fasting glucose             | Yes                                         | Lab                                                                    |          |       |
| 377 | Iran      | 2007       | Isfahan Healthy Heart Programme (IHHP), Isfahan                                                                                                              | Community                   | urban                 | 19+                                   | 19+   | 1,435                                | 1,415   | Fasting glucose             | Yes                                         | Lab                                                                    |          |       |
| 378 | Iran      | 2007       | Isfahan Healthy Heart Programme (IHHP), Najaf Abad                                                                                                           | Community                   | rural                 | 19+                                   | 19+   | 254                                  | 254     | Fasting glucose             | Yes                                         | Lab                                                                    |          |       |
| 379 | Iran      | 2007       | Isfahan Healthy Heart Programme (IHHP), Najaf Abad                                                                                                           | Community                   | urban                 | 19+                                   | 19+   | 544                                  | 498     | Fasting glucose             | Yes                                         | Lab                                                                    |          |       |
| 380 | Iran      | 2007       | Isfahan Healthy Heart Programme (IHHP) Students, Arak                                                                                                        | Community                   | rural                 | 18                                    | 18    | 4                                    | 8       | Fasting glucose             | No                                          | Lab                                                                    |          |       |
| 381 | Iran      | 2007       | Isfahan Healthy Heart Programme (IHHP) Students, Arak                                                                                                        | Community                   | urban                 | 18                                    | 18    | 4                                    | 17      | Fasting glucose             | No                                          | Lab                                                                    |          |       |
| 382 | Iran      | 2007       | Isfahan Healthy Heart Programme (IHHP) Students, Isfahan                                                                                                     | Community                   | urban                 | 18                                    | 18    | 6                                    | 9       | Fasting glucose             | No                                          | Lab                                                                    |          |       |
| 383 | Iran      | 2007       | Isfahan Healthy Heart Programme (IHHP) Students, Najaf Abad                                                                                                  | Community                   | rural                 | 18                                    | 18    |                                      | 3       | Fasting glucose             | No                                          | Lab                                                                    |          |       |
| 384 | Iran      | 2007       | STEPS - National                                                                                                                                             | National                    | both                  | 25-64                                 | 25-64 | 1,886                                | 1,912   | Fasting glucose             | Yes                                         | Lab                                                                    |          |       |
| 385 | Iran      | 2007       | STEPS - Provincial                                                                                                                                           | National                    | both                  | 25-64                                 | 25-64 | 11,705                               | 11,919  | Fasting glucose             | Yes                                         | Lab                                                                    |          |       |
| 386 | Iran      | 2009-2010  | Childhood and Adolescence Surveillance and Prevention of Adult Noncommunicable Disease (CASPIAN)                                                             | National                    | both                  | 18                                    | 18    | 532                                  | 497     | Fasting glucose             | Yes                                         | Lab                                                                    |          |       |

|     | Country | Data years | Survey/Study name/Citation                                                                              | Level of representativeness | Rural, urban, or both | Age range as used for global analysis |       | Sample size used for global analysis |        | Glycaemic markers available | Information available on diabetes treatment | Whether measured in a laboratory or by a point-of-care portable device |       | Notes |
|-----|---------|------------|---------------------------------------------------------------------------------------------------------|-----------------------------|-----------------------|---------------------------------------|-------|--------------------------------------|--------|-----------------------------|---------------------------------------------|------------------------------------------------------------------------|-------|-------|
|     |         |            |                                                                                                         |                             |                       | Female                                | Male  | Female                               | Male   |                             |                                             | Glucose                                                                | HbA1c |       |
| 387 | Iran    | 2009-2010  | The Persian Gulf Healthy Heart Study                                                                    | Subnational                 | urban                 | 31-79                                 | 31-79 | 1,014                                | 833    | Fasting glucose             | Yes                                         | Lab                                                                    |       |       |
| 388 | Iran    | 2008-2011  | Tehran Lipid and Glucose Study                                                                          | Community                   | urban                 | 20+                                   | 20+   | 6,000                                | 4,704  | Fasting glucose             | Yes                                         | Lab                                                                    |       |       |
| 389 | Iran    | 2010-2012  | Golestan Cohort Study Second Phase                                                                      | Subnational                 | rural                 | 43-82                                 | 43-82 | 4,921                                | 4,325  | Fasting glucose             | Yes                                         | Lab                                                                    |       |       |
| 390 | Iran    | 2010-2012  | Golestan Cohort Study Second Phase                                                                      | Community                   | urban                 | 43-82                                 | 43-82 | 1,061                                | 1,091  | Fasting glucose             | Yes                                         | Lab                                                                    |       |       |
| 391 | Iran    | 2011       | STEPS                                                                                                   | National                    | both                  | 25-69                                 | 25-69 | 4,854                                | 3,313  | Fasting glucose             | Yes                                         | Lab                                                                    |       |       |
| 392 | Iran    | 2011-2012  | Amol county study                                                                                       | Community                   | rural                 | 18+                                   | 18+   | 1,024                                | 1,685  | Fasting glucose             | Yes                                         | Lab                                                                    |       |       |
| 393 | Iran    | 2011-2012  | Amol county study                                                                                       | Community                   | urban                 | 18+                                   | 18+   | 1,476                                | 1,522  | Fasting glucose             | Yes                                         | Lab                                                                    |       |       |
| 394 | Iran    | 2012-2013  | Tehran City                                                                                             | Community                   | urban                 | 18-90                                 | 18-90 | 519                                  | 395    | Fasting glucose             | Yes                                         | Lab                                                                    |       |       |
| 395 | Iran    | 2012-2014  | Pars Cohort Study                                                                                       | Community                   | rural                 | 40-90                                 | 40-90 | 4,988                                | 4,276  | Fasting glucose             | Yes                                         | Lab                                                                    |       |       |
| 396 | Iran    | 2012-2013  | Zahedan City                                                                                            | Community                   | urban                 | 18-90                                 | 18-90 | 1,072                                | 1,133  | Fasting glucose             | Yes                                         | Lab                                                                    |       |       |
| 397 | Iran    | 2013-2014  | Bushehr Elderly Health Program (BEH)                                                                    | Community                   | urban                 | 60+                                   | 60+   | 1,545                                | 1,455  | Fasting glucose             | Yes                                         | Lab                                                                    |       |       |
| 398 | Iran    | 2013-2014  | Gilan Eye Study                                                                                         | Subnational                 | both                  | 50+                                   | 50+   | 1,159                                | 839    | Fasting glucose, HbA1c      | No                                          | Lab                                                                    | Lab   |       |
| 399 | Iran    | 2014-2015  | Childhood and Adolescence Surveillance and Prevention of Adult Noncommunicable Disease (CASPIAN)        | National                    | both                  | 18                                    | 18    | 388                                  | 330    | Fasting glucose             | Yes                                         | Lab                                                                    |       |       |
| 400 | Iran    | 2014-2016  | The PERSIAN Fasa Cohort Study                                                                           | Community                   | rural                 | 35-70                                 | 35-70 | 4,584                                | 3,752  | Fasting glucose             | Yes                                         | Lab                                                                    |       |       |
| 401 | Iran    | 2014-2016  | The PERSIAN Fasa Cohort Study                                                                           | Community                   | urban                 | 35-70                                 | 35-70 | 812                                  | 722    | Fasting glucose             | Yes                                         | Lab                                                                    |       |       |
| 402 | Iran    | 2014-2016  | The PERSIAN Guilan Cohort Study                                                                         | Community                   | rural                 | 35-70                                 | 35-70 | 3,261                                | 2,646  | Fasting glucose             | Yes                                         | Lab                                                                    |       |       |
| 403 | Iran    | 2014-2016  | The PERSIAN Guilan Cohort Study                                                                         | Community                   | urban                 | 35-70                                 | 35-70 | 2,350                                | 2,236  | Fasting glucose             | Yes                                         | Lab                                                                    |       |       |
| 404 | Iran    | 2014-2016  | The PERSIAN Kermanshah Cohort Study                                                                     | Community                   | rural                 | 35-70                                 | 35-70 | 2,198                                | 1,809  | Fasting glucose             | Yes                                         | Lab                                                                    |       |       |
| 405 | Iran    | 2014-2016  | The PERSIAN Kermanshah Cohort Study                                                                     | Community                   | urban                 | 35-70                                 | 35-70 | 2,976                                | 2,948  | Fasting glucose             | Yes                                         | Lab                                                                    |       |       |
| 406 | Iran    | 2014-2016  | The PERSIAN Kharameh Cohort Study                                                                       | Community                   | rural                 | 35-70                                 | 35-70 | 3,861                                | 2,914  | Fasting glucose             | Yes                                         | Lab                                                                    |       |       |
| 407 | Iran    | 2014-2016  | The PERSIAN Kharameh Cohort Study                                                                       | Community                   | urban                 | 35-70                                 | 35-70 | 2,001                                | 1,795  | Fasting glucose             | Yes                                         | Lab                                                                    |       |       |
| 408 | Iran    | 2014-2016  | The PERSIAN Tabriz Cohort Study                                                                         | Community                   | rural                 | 35-70                                 | 35-70 | 2,549                                | 1,974  | Fasting glucose             | Yes                                         | Lab                                                                    |       |       |
| 409 | Iran    | 2014-2016  | The PERSIAN Tabriz Cohort Study                                                                         | Community                   | urban                 | 35-70                                 | 35-70 | 5,595                                | 4,671  | Fasting glucose             | Yes                                         | Lab                                                                    |       |       |
| 410 | Iran    | 2015-2017  | The PERSIAN Mazandaran Cohort Study                                                                     | Community                   | rural                 | 35-70                                 | 35-70 | 1,608                                | 936    | Fasting glucose             | Yes                                         | Lab                                                                    |       |       |
| 411 | Iran    | 2015-2017  | The PERSIAN Mazandaran Cohort Study                                                                     | Community                   | urban                 | 35-70                                 | 35-70 | 4,421                                | 3,179  | Fasting glucose             | Yes                                         | Lab                                                                    |       |       |
| 412 | Iran    | 2015-2017  | The PERSIAN Rafsanjan Cohort Study                                                                      | Community                   | rural                 | 35-70                                 | 35-70 | 1,030                                | 1,578  | Fasting glucose             | Yes                                         | Lab                                                                    |       |       |
| 413 | Iran    | 2015-2017  | The PERSIAN Rafsanjan Cohort Study                                                                      | Community                   | urban                 | 35-70                                 | 35-70 | 4,280                                | 3,593  | Fasting glucose             | Yes                                         | Lab                                                                    |       |       |
| 414 | Iran    | 2016       | Iran STEPS 2016                                                                                         | National                    | both                  | 25+                                   | 25+   | 10,015                               | 8,704  | Fasting glucose, HbA1c      | No                                          | Lab                                                                    | Lab   |       |
| 415 | Iran    | 2015-2017  | The PERSIAN Yazd Cohort Study                                                                           | Community                   | urban                 | 30-70                                 | 30-70 | 4,861                                | 5,002  | Fasting glucose             | Yes                                         | Lab                                                                    |       |       |
| 416 | Iran    | 2016-2018  | The PERSIAN Ahvaz Cohort Study                                                                          | Community                   | rural                 | 35-70                                 | 35-70 | 2,282                                | 1,479  | Fasting glucose             | Yes                                         | Lab                                                                    |       |       |
| 417 | Iran    | 2016-2018  | The PERSIAN Ahvaz Cohort Study                                                                          | Community                   | urban                 | 35-70                                 | 35-70 | 3,554                                | 2,512  | Fasting glucose             | Yes                                         | Lab                                                                    |       |       |
| 418 | Iran    | 2016-2018  | The PERSIAN BandarKong Cohort Study                                                                     | Community                   | rural                 | 35-70                                 | 35-70 | 366                                  | 234    | Fasting glucose             | Yes                                         | Lab                                                                    |       |       |
| 419 | Iran    | 2016-2018  | The PERSIAN BandarKong Cohort Study                                                                     | Community                   | urban                 | 35-70                                 | 35-70 | 1,902                                | 1,485  | Fasting glucose             | Yes                                         | Lab                                                                    |       |       |
| 420 | Iran    | 2017       | Northwest Iran - population based blood sample programme                                                | Community                   | urban                 | 21+                                   | 21+   | 317                                  | 176    | Fasting glucose, HbA1c      | No                                          | Lab                                                                    | Lab   |       |
| 421 | Iran    | 2016-2017  | IraPEN Study                                                                                            | Community                   | rural                 | 30+                                   | 30+   | 3,173                                | 2,919  | Fasting glucose             | No                                          | Portable                                                               |       |       |
| 422 | Iran    | 2016-2017  | Iranian Children and Adolescents Psychiatric Disorders (IRCAP) Survey                                   | Subnational                 | both                  | 18                                    | 18    | 16                                   | 15     | Fasting glucose             | No                                          | Lab                                                                    |       |       |
| 423 | Iran    | 2016-2018  | The PERSIAN Urmia Cohort Study                                                                          | Community                   | rural                 | 35-70                                 | 35-70 | 2,379                                | 1,821  | Fasting glucose             | Yes                                         | Lab                                                                    |       |       |
| 424 | Iran    | 2016-2018  | The PERSIAN Urmia Cohort Study                                                                          | Community                   | urban                 | 35-70                                 | 35-70 | 484                                  | 423    | Fasting glucose             | Yes                                         | Lab                                                                    |       |       |
| 425 | Iran    | 2015-2018  | The PERSIAN Zahedan Cohort Study                                                                        | Community                   | urban                 | 35-70                                 | 35-70 | 6,024                                | 3,909  | Fasting glucose             | Yes                                         | Lab                                                                    |       |       |
| 426 | Iran    | 2016-2020  | The PERSIAN Ardabil Cohort Study                                                                        | Community                   | urban                 | 35-70                                 | 35-70 | 11,250                               | 9,552  | Fasting glucose             | Yes                                         | Lab                                                                    |       |       |
| 427 | Iran    | 2017-2019  | The PERSIAN Dena (Yasouj) Cohort Study                                                                  | Community                   | rural                 | 35-70                                 | 35-70 | 920                                  | 610    | Fasting glucose             | Yes                                         | Lab                                                                    |       |       |
| 428 | Iran    | 2017-2019  | The PERSIAN Dena (Yasouj) Cohort Study                                                                  | Community                   | urban                 | 35-70                                 | 35-70 | 1,126                                | 960    | Fasting glucose             | Yes                                         | Lab                                                                    |       |       |
| 429 | Iran    | 2018-2019  | Prevalence of risk factors for cardiovascular disease among a rural population in eastern Iran          | Community                   | rural                 | 18-69                                 | 18-69 | 146                                  | 152    | Fasting glucose             | Yes                                         | Lab                                                                    |       |       |
| 430 | Iran    | 2017-2018  | The PERSIAN Kavar Cohort Study                                                                          | Community                   | urban                 | 35-70                                 | 35-70 | 2,540                                | 2,418  | Fasting glucose             | Yes                                         | Lab                                                                    |       |       |
| 431 | Iran    | 2016-2019  | The Khuzestan comprehensive health study: A platform for NCDs, blood borne and mental diseases research | Subnational                 | both                  | 20-65                                 | 20-65 | 18,413                               | 10,216 | Fasting glucose             | No                                          | Lab                                                                    |       |       |
| 432 | Iran    | 2017-2018  | PERSIAN Elderly Component-Iranian Longitudinal Study on Ageing                                          | Subnational                 | urban                 | 50-95                                 | 50-95 | 3,943                                | 3,497  | Fasting glucose             | Yes                                         | Lab                                                                    |       |       |
| 433 | Iran    | 2017-2019  | The PERSIAN Sabzevar Cohort Study                                                                       | Community                   | urban                 | 35-70                                 | 35-70 | 2,341                                | 1,898  | Fasting glucose             | Yes                                         | Lab                                                                    |       |       |
| 434 | Iran    | 2016-2019  | The PERSIAN Shahrekord Cohort Study                                                                     | Community                   | rural                 | 35-70                                 | 35-70 | 1,791                                | 1,233  | Fasting glucose             | Yes                                         | Lab                                                                    |       |       |
| 435 | Iran    | 2016-2019  | The PERSIAN Shahrekord Cohort Study                                                                     | Community                   | urban                 | 35-70                                 | 35-70 | 3,495                                | 3,499  | Fasting glucose             | Yes                                         | Lab                                                                    |       |       |
| 436 | Iran    | 2018-2020  | Bushehr Elderly Health program Phase II                                                                 | Community                   | urban                 | 50-95                                 | 50-95 | 1,120                                | 835    | Fasting glucose, HbA1c      | Yes                                         | Lab                                                                    | Lab   |       |
| 437 | Iran    | 2018-2019  | The PERSIAN Dehgolan (Kordisian) Cohort Study                                                           | Community                   | urban                 | 35-70                                 | 35-70 | 2,206                                | 1,748  | Fasting glucose             | Yes                                         | Lab                                                                    |       |       |
| 438 | Iran    | 2020-2021  | STEPS                                                                                                   | National                    | both                  | 25+                                   | 25+   | 13,979                               | 11,202 | Fasting glucose, HbA1c      | Yes                                         | Lab                                                                    | Lab   |       |
| 439 | Iraq    | 2006       | STEPS                                                                                                   | National                    | both                  | 25-65                                 | 25-65 | 2,379                                | 1,817  | Fasting glucose             | No                                          | Lab                                                                    |       |       |
| 440 | Iraq    | 2015       | STEPS                                                                                                   | National                    | both                  | 18+                                   | 18+   | 1,530                                | 959    | Fasting glucose             | Yes                                         | Lab                                                                    |       |       |
| 441 | Ireland | 2006-2007  | Survey of Lifestyle, Attitudes and Nutritional in Ireland 2006-2007                                     | National                    | both                  | 45+                                   | 45+   | 680                                  | 526    | HbA1c                       | Yes                                         | Lab                                                                    | Lab   |       |
| 442 | Ireland | 2008-2010  | National Adult Nutrition Survey                                                                         | National                    | both                  | 18+                                   | 18+   | 440                                  | 445    | Fasting glucose             | No                                          | Lab                                                                    |       |       |
| 443 | Israel  | 1990-1991  | The Jerusalem Longitudinal Cohort Study                                                                 | Community                   | urban                 | 69-70                                 | 69-70 | 207                                  | 249    | Fasting glucose             | Yes                                         | Lab                                                                    |       |       |
| 444 | Israel  | 1997-1998  | The Jerusalem Longitudinal Cohort Study                                                                 | Community                   | urban                 | 76-77                                 | 76-77 | 454                                  | 446    | Fasting glucose             | Yes                                         | Lab                                                                    |       |       |
| 445 | Israel  | 1999-2005  | The Israel Glucose Intolerance, Obesity and Hypertension Study (GOH)                                    | National                    | urban                 | 58-93                                 | 58-93 | 607                                  | 536    | Fasting glucose             | Yes                                         | Lab                                                                    |       |       |
| 446 | Israel  | 2002-2008  | The Hadera District Study (HDS)                                                                         | Subnational                 | urban                 | 25-78                                 | 25-78 | 551                                  | 550    | Fasting glucose             | Yes                                         | Lab                                                                    |       |       |
| 447 | Israel  | 2005-2006  | The Jerusalem Longitudinal Cohort Study                                                                 | Community                   | urban                 | 83-85                                 | 83-85 | 635                                  | 522    | Fasting glucose             | Yes                                         | Lab                                                                    |       |       |
| 448 | Israel  | 2010-2011  | The Jerusalem Longitudinal Cohort Study                                                                 | Community                   | urban                 | 89-92                                 | 89-92 | 347                                  | 259    | Fasting glucose             | Yes                                         | Lab                                                                    |       |       |
| 449 | Italy   | 1982       | Verrillo et al, Diabetes Res 2:301-6, 1985                                                              | Community                   | rural                 | 18+                                   | 18+   | 476                                  | 410    | Fasting glucose             | No                                          | Unknown                                                                |       |       |
| 450 | Italy   | 1983-1985  | Gubbio Study                                                                                            | Community                   | both                  | 18+                                   | 18+   | 2,512                                | 2,040  | Fasting glucose             | Yes                                         | Lab                                                                    |       |       |
| 451 | Italy   | 1983-1984  | Malattie cardiovascolari ATerosclerotiche Istituto Superiore di Sanità (MATISS)                         | Community                   | rural                 | 19-69                                 | 19-69 | 1,903                                | 1,700  | Fasting glucose             | Yes                                         | Lab                                                                    |       |       |
| 452 | Italy   | 1986-1987  | Malattie cardiovascolari ATerosclerotiche Istituto Superiore di Sanità (MATISS)                         | Community                   | rural                 | 19-72                                 | 19-72 | 1,479                                | 1,209  | Fasting glucose             | Yes                                         | Lab                                                                    |       |       |

|     | Country | Data years | Survey/Study name/Citation                                                                              | Level of representativeness | Rural, urban, or both | Age range as used for global analysis |        | Sample size used for global analysis |        | Glycaemic markers available | Information available on diabetes treatment | Whether measured in a laboratory or by a point-of-care portable device |          | Notes |
|-----|---------|------------|---------------------------------------------------------------------------------------------------------|-----------------------------|-----------------------|---------------------------------------|--------|--------------------------------------|--------|-----------------------------|---------------------------------------------|------------------------------------------------------------------------|----------|-------|
|     |         |            |                                                                                                         |                             |                       | Female                                | Male   | Female                               | Male   |                             |                                             | Glucose                                                                | HbA1c    |       |
| 453 | Italy   | 1986-1987  | MONICA, Brianza                                                                                         | Subnational                 | both                  | 25-64                                 | 25-64  | 803                                  | 787    | Fasting glucose             | No                                          | Lab                                                                    |          |       |
| 454 | Italy   | 1989       | Ventimiglia Heart Study                                                                                 | Community                   | rural                 | 18+                                   | 18+    | 599                                  | 500    | Fasting glucose             | Yes                                         | Lab                                                                    |          |       |
| 455 | Italy   | 1990       | Bruneck Study                                                                                           | Community                   | rural                 | 40-79                                 | 40-79  | 450                                  | 469    | Fasting glucose             | Yes                                         | Lab                                                                    |          |       |
| 456 | Italy   | 1989-1990  | MONICA, Brianza                                                                                         | Subnational                 | both                  | 25-64                                 | 25-64  | 769                                  | 785    | Fasting glucose             | No                                          | Lab                                                                    |          |       |
| 457 | Italy   | 1991       | DECODE; DECODE Study Group, Diabetes Care 26:61-9, 2003                                                 | Community                   | urban                 | 40-89                                 | 40-89  | 1,013                                | 804    | Fasting glucose             | No                                          | Unknown                                                                |          |       |
| 458 | Italy   | 1991       | Finland, Italy, Netherlands, Elderly (Fine-Italy)                                                       | Community                   | rural                 |                                       | 70-90  |                                      | 423    | Fasting glucose             | Yes                                         | Lab                                                                    |          |       |
| 459 | Italy   | 1989-1992  | Gubbio Study                                                                                            | Community                   | both                  | 18+                                   | 18+    | 1,886                                | 1,549  | Fasting glucose             | Yes                                         | Lab                                                                    |          |       |
| 460 | Italy   | 1992-1993  | Italian Longitudinal Study on Aging                                                                     | National                    | both                  | 65-84                                 | 65-84  | 2,146                                | 2,271  | Fasting glucose             | Yes                                         | Lab                                                                    |          |       |
| 461 | Italy   | 1993-1996  | Malattie cardiovascolari ATerosclerotiche Istituto Superiore di Sanità (MATISS)                         | Community                   | rural                 | 20-77                                 | 20-77  | 991                                  | 963    | Fasting glucose             | Yes                                         | Lab                                                                    |          |       |
| 462 | Italy   | 1993-1994  | MONICA, Brianza                                                                                         | Subnational                 | urban                 | 25-64                                 | 25-64  | 774                                  | 740    | Fasting glucose             | Yes                                         | Lab                                                                    |          |       |
| 463 | Italy   | 1995       | Vobarno Study; Muesan et al, Blood Press 15:14-9, 2006                                                  | Community                   | both                  | 35-64                                 | 35-64  | 309                                  | 265    | Fasting glucose             | No                                          | Unknown                                                                |          |       |
| 464 | Italy   | 1995       | Bruneck Study                                                                                           | Community                   | rural                 | 45-84                                 | 45-84  | 410                                  | 411    | Fasting glucose             | Yes                                         | Lab                                                                    |          |       |
| 465 | Italy   | 1995-1996  | Italian Longitudinal Study on Aging                                                                     | National                    | both                  | 68-90                                 | 68-90  | 1,413                                | 1,541  | Fasting glucose             | Yes                                         | Lab                                                                    |          |       |
| 466 | Italy   | 1995-1999  | PROgetto Veneto Anziani (PROVA)                                                                         | Subnational                 | both                  | 65+                                   | 65+    | 1,853                                | 1,243  | Fasting glucose             | Yes                                         | Lab                                                                    |          |       |
| 467 | Italy   | 1999       | InCHIANTI Study; Ferrucci et al., J Am Geriatr Soc 48:1618-25, 2000                                     | Community                   | both                  | 25+                                   | 25+    | 725                                  | 582    | Fasting glucose             | No                                          | Unknown                                                                |          |       |
| 468 | Italy   | 1998-1999  | Progetto VIP                                                                                            | Community                   | both                  | 25-74                                 | 25-74  | 601                                  | 599    | Fasting glucose             | Yes                                         | Lab                                                                    |          |       |
| 469 | Italy   | 2000       | Bruneck Study                                                                                           | Community                   | rural                 | 50-89                                 | 50-89  | 361                                  | 331    | Fasting glucose, HbA1c      | Yes                                         | Lab                                                                    | Lab      |       |
| 470 | Italy   | 2000       | Finland, Italy, Netherlands, Elderly (Fine-Italy)                                                       | Community                   | rural                 |                                       | 80-100 |                                      | 225    | Fasting glucose             | Yes                                         | Lab                                                                    |          |       |
| 471 | Italy   | 1998-2002  | Osservatorio Epidemiologico Cardiovascolare (OEC)                                                       | National                    | both                  | 35-74                                 | 35-74  | 4,771                                | 4,878  | Fasting glucose             | Yes                                         | Lab                                                                    |          |       |
| 472 | Italy   | 2000-2001  | Italian Longitudinal Study on Aging                                                                     | National                    | both                  | 73-93                                 | 73-93  | 987                                  | 941    | Fasting glucose             | Yes                                         | Lab                                                                    |          |       |
| 473 | Italy   | 2002       | Vobarno Study; Muesan et al, Blood Press 15:14-9, 2006                                                  | Community                   | both                  | 25-64                                 | 25-64  | 216                                  | 169    | Fasting glucose             | No                                          | Unknown                                                                |          |       |
| 474 | Italy   | 2000-2003  | PROgetto Veneto Anziani (PROVA)                                                                         | Subnational                 | both                  | 67+                                   | 67+    | 1,377                                | 813    | Fasting glucose             | Yes                                         | Lab                                                                    |          |       |
| 475 | Italy   | 2001-2004  | Scuteri et al., Nutr Metab Cardiovasc Dis 19:532-41, 2009                                               | Community                   | urban                 | 18+                                   | 18+    | 2,265                                | 1,697  | Fasting glucose             | No                                          | Lab                                                                    |          |       |
| 476 | Italy   | 2003       | The European Male Ageing Study                                                                          | Community                   | both                  |                                       | 40+    |                                      | 428    | Fasting glucose             | Yes                                         | Lab                                                                    |          |       |
| 477 | Italy   | 2001-2007  | Gubbio Study                                                                                            | Community                   | both                  | 26+                                   | 26+    | 1,462                                | 1,191  | Fasting glucose             | Yes                                         | Lab                                                                    |          |       |
| 478 | Italy   | 2002-2005  | PROgetto Veneto Anziani (PROVA)                                                                         | Subnational                 | both                  | 68+                                   | 68+    | 1,147                                | 629    | Fasting glucose             | Yes                                         | Lab                                                                    |          |       |
| 479 | Italy   | 2005       | Bruneck Study                                                                                           | Community                   | rural                 | 55-93                                 | 55-93  | 307                                  | 263    | Fasting glucose, HbA1c      | Yes                                         | Lab                                                                    | Lab      |       |
| 480 | Italy   | 2004-2005  | Italian Project on the Epidemiology of Alzheimer's Disease                                              | National                    | both                  | 65-84                                 | 65-84  | 1,444                                | 1,589  | Fasting glucose             | Yes                                         | Lab                                                                    |          |       |
| 481 | Italy   | 2004-2005  | Vobarno study                                                                                           | Community                   | rural                 | 55-74                                 | 55-74  | 113                                  | 99     | Fasting glucose             | Yes                                         | Lab                                                                    |          |       |
| 482 | Italy   | 2005-2007  | Moli-family Study                                                                                       | Subnational                 | both                  | 18+                                   | 18+    | 270                                  | 216    | Fasting glucose             | Yes                                         | Lab                                                                    |          |       |
| 483 | Italy   | 2008       | The European Male Ageing Study                                                                          | Community                   | both                  |                                       | 45+    |                                      | 344    | Fasting glucose             | Yes                                         | Lab                                                                    |          |       |
| 484 | Italy   | 2005-2010  | Moli-sani Study                                                                                         | Subnational                 | both                  | 35+                                   | 35+    | 12,366                               | 11,495 | Fasting glucose             | Yes                                         | Lab                                                                    |          |       |
| 485 | Italy   | 2008-2009  | Progetto VIP                                                                                            | Community                   | both                  | 25-74                                 | 25-74  | 600                                  | 600    | Fasting glucose             | Yes                                         | Lab                                                                    |          |       |
| 486 | Italy   | 2010       | Bruneck Study                                                                                           | Community                   | rural                 | 60+                                   | 60+    | 259                                  | 225    | Fasting glucose, HbA1c      | Yes                                         | Lab                                                                    | Lab      |       |
| 487 | Italy   | 2009-2010  | Factors associated with metabolic syndrome in a mediterranean population: role of caffeinated beverages | Community                   | both                  | 19-88                                 | 19-88  | 1,119                                | 752    | Fasting glucose             | No                                          | Unknown                                                                |          |       |
| 488 | Italy   | 2008-2012  | Osservatorio Epidemiologico Cardiovascolare/Health Examination Survey (OEC/HES)                         | National                    | both                  | 35-80                                 | 35-80  | 4,330                                | 4,369  | Fasting glucose             | Yes                                         | Lab                                                                    |          |       |
| 489 | Italy   | 2010-2012  | CArdiovascular risk MEtabolic syndrome LIver and Autoimmunity diseases (CA.ME.LIA)                      | Community                   | both                  | 18-75                                 | 18-75  | 506                                  | 466    | Fasting glucose             | Yes                                         | Lab                                                                    |          |       |
| 490 | Italy   | 2011-2012  | Vobarno study                                                                                           | Community                   | rural                 | 49-62                                 | 49-62  | 143                                  | 107    | Fasting glucose             | Yes                                         | Lab                                                                    |          |       |
| 491 | Italy   | 2015       | Bruneck Study                                                                                           | Community                   | rural                 | 65+                                   | 65+    | 169                                  | 171    | Fasting glucose, HbA1c      | Yes                                         | Lab                                                                    | Lab      |       |
| 492 | Italy   | 2016       | The Tyrolean Early Vascular Ageing-study (EVA-Tyrol) - South-Tyrol                                      | Subnational                 | both                  |                                       | 18     |                                      | 2      | Fasting glucose, HbA1c      | Yes                                         | Lab                                                                    | Lab      |       |
| 493 | Italy   | 2018-2019  | Progetto VIP                                                                                            | Community                   | both                  | 25-74                                 | 25-74  | 598                                  | 600    | Fasting glucose             | Yes                                         | Lab                                                                    |          |       |
| 494 | Italy   | 2017-2020  | Moli-sani Study                                                                                         | Subnational                 | both                  | 47-94                                 | 47-94  | 1,309                                | 1,081  | Fasting glucose             | Yes                                         | Lab                                                                    |          |       |
| 495 | Jamaica | 1991       | Eldemire et al, West Indian Med J 45:82-4, 1996                                                         | National                    | both                  | 60+                                   | 60+    | 669                                  | 649    | Fasting glucose             | No                                          | Unknown                                                                |          |       |
| 496 | Jamaica | 1995       | MacFarlane-Anderson et al., Metabolism 47:617-21, 1998                                                  | Community                   | urban                 | 25+                                   | 25+    | 329                                  | 233    | Fasting glucose             | No                                          | Unknown                                                                |          |       |
| 497 | Jamaica | 2000-2001  | Jamaica Health and Lifestyle Survey                                                                     | National                    | both                  | 18-74                                 | 18-74  | 1,249                                | 622    | Fasting glucose             | Yes                                         | Portable                                                               |          |       |
| 498 | Jamaica | 2006-2007  | Jamaica Youth Risk and Resiliency Behaviour Survey 2006                                                 | National                    | both                  | 18-19                                 | 18-19  | 192                                  | 152    | Fasting glucose             | Yes                                         | Portable                                                               |          |       |
| 499 | Jamaica | 2007-2008  | Jamaica Health and Lifestyle Survey                                                                     | National                    | both                  | 18-74                                 | 18-74  | 1,869                                | 842    | Fasting glucose             | Yes                                         | Portable                                                               |          |       |
| 500 | Jamaica | 2012       | Older Persons in Jamaica 2012                                                                           | National                    | both                  | 60+                                   | 60+    | 208                                  | 156    | HbA1c                       | Yes                                         |                                                                        | Lab      |       |
| 501 | Jamaica | 2016-2017  | Jamaica Health and Lifestyle Survey                                                                     | National                    | both                  | 18+                                   | 18+    | 1,633                                | 1,026  | Fasting glucose, HbA1c      | Yes                                         | Portable                                                               | Portable |       |
| 502 | Japan   | 1985-1986  | Akabane Study                                                                                           | Community                   | urban                 | 40-69                                 | 40-69  | 593                                  | 471    | Fasting glucose             | No                                          | Unknown                                                                |          |       |
| 503 | Japan   | 1987       | Konan Town Study                                                                                        | Community                   | rural                 | 20-79                                 | 20-79  | 87                                   | 69     | Fasting glucose             | No                                          | Unknown                                                                |          |       |
| 504 | Japan   | 1988       | Konan Town Study                                                                                        | Community                   | rural                 | 20-79                                 | 20-79  | 85                                   | 76     | Fasting glucose             | No                                          | Unknown                                                                |          |       |
| 505 | Japan   | 1988       | The Hisayama Study                                                                                      | Community                   | rural                 | 40+                                   | 40+    | 1,574                                | 1,162  | Fasting glucose             | Yes                                         | Lab                                                                    |          |       |
| 506 | Japan   | 1989       | Konan Town Study                                                                                        | Community                   | rural                 | 20-79                                 | 20-79  | 63                                   | 59     | Fasting glucose             | No                                          | Unknown                                                                |          |       |
| 507 | Japan   | 1989       | National Nutrition Survey                                                                               | National                    | both                  | 30+                                   | 30+    | 1,613                                | 1,377  | Fasting glucose             | No                                          | Lab                                                                    |          |       |
| 508 | Japan   | 1990       | Konan Town Study                                                                                        | Community                   | rural                 | 20-79                                 | 20-79  | 58                                   | 30     | Fasting glucose             | No                                          | Unknown                                                                |          |       |
| 509 | Japan   | 1990       | National Nutrition Survey and National Cardiovascular Survey                                            | National                    | both                  | 30+                                   | 30+    | 1,615                                | 1,517  | Fasting glucose             | No                                          | Lab                                                                    |          |       |
| 510 | Japan   | 1991       | DECODA; DECODA Study Group, Diabetes Care 26:1770-80, 2003                                              | Community                   | rural                 | 30-89                                 | 30-89  | 5,182                                | 3,896  | Fasting glucose             | No                                          | Unknown                                                                |          |       |
| 511 | Japan   | 1991       | Konan Town Study                                                                                        | Community                   | rural                 | 20-79                                 | 20-79  | 117                                  | 93     | Fasting glucose             | No                                          | Unknown                                                                |          |       |
| 512 | Japan   | 1991       | National Nutrition Survey                                                                               | National                    | both                  | 30+                                   | 30+    | 1,523                                | 1,444  | Fasting glucose             | No                                          | Lab                                                                    |          |       |
| 513 | Japan   | 1992       | Konan Town Study                                                                                        | Community                   | rural                 | 20-79                                 | 20-79  | 52                                   | 55     | Fasting glucose             | No                                          | Unknown                                                                |          |       |
| 514 | Japan   | 1992       | National Nutrition Survey                                                                               | National                    | both                  | 30+                                   | 30+    | 1,445                                | 1,332  | Fasting glucose             | No                                          | Lab                                                                    |          |       |
| 515 | Japan   | 1993       | Konan Town Study                                                                                        | Community                   | rural                 | 20-79                                 | 20-79  | 65                                   | 54     | Fasting glucose             | No                                          | Unknown                                                                |          |       |
| 516 | Japan   | 1993       | National Nutrition Survey                                                                               | National                    | both                  | 30+                                   | 30+    | 1,360                                | 1,251  | Fasting glucose             | No                                          | Lab                                                                    |          |       |
| 517 | Japan   | 1994       | Konan Town Study                                                                                        | Community                   | rural                 | 20-79                                 | 20-79  | 59                                   | 42     | Fasting glucose             | No                                          | Unknown                                                                |          |       |
| 518 | Japan   | 1994       | National Nutrition Survey                                                                               | National                    | both                  | 20-59                                 | 20-59  | 1,112                                | 970    | Fasting glucose             | No                                          | Lab                                                                    |          |       |

|     | Country    | Data years | Survey/Study name/Citation                                                                   | Level of representativeness | Rural, urban, or both | Age range as used for global analysis |       | Sample size used for global analysis |         | Glycaemic markers available | Information available on diabetes treatment | Whether measured in a laboratory or by a point-of-care device |         | Notes |
|-----|------------|------------|----------------------------------------------------------------------------------------------|-----------------------------|-----------------------|---------------------------------------|-------|--------------------------------------|---------|-----------------------------|---------------------------------------------|---------------------------------------------------------------|---------|-------|
|     |            |            |                                                                                              |                             |                       | Female                                | Male  | Female                               | Male    |                             |                                             | Glucose                                                       | HbA1c   |       |
| 519 | Japan      | 1995       | Konan Town Study                                                                             | Community                   | rural                 | 20-79                                 | 20-79 | 60                                   | 45      | Fasting glucose             | No                                          | Unknown                                                       |         |       |
| 520 | Japan      | 1995       | National Nutrition Survey                                                                    | National                    | both                  | 20-59                                 | 20-59 | 1,076                                | 948     | Fasting glucose             | No                                          | Lab                                                           |         |       |
| 521 | Japan      | 1996       | National Nutrition Survey                                                                    | National                    | both                  | 30+                                   | 30+   | 1,060                                | 953     | Fasting glucose             | No                                          | Lab                                                           |         |       |
| 522 | Japan      | 1997       | National Nutrition Survey                                                                    | National                    | both                  | 20+                                   | 20+   | 1,293                                | 1,196   | Fasting glucose             | No                                          | Lab                                                           |         |       |
| 523 | Japan      | 1998       | APCSC-Akabane                                                                                | Community                   | urban                 | 35-74                                 | 35-74 | 593                                  | 471     | Fasting glucose             | No                                          | Unknown                                                       |         |       |
| 524 | Japan      | 1998       | National Nutrition Survey                                                                    | National                    | both                  | 20+                                   | 20+   | 1,337                                | 1,135   | Fasting glucose             | No                                          | Lab                                                           |         |       |
| 525 | Japan      | 1998-2000  | The Japan Public Health Center-based Prospective Diabetes study: JPHC Diabetes study         | Subnational                 | both                  | 46-75                                 | 46-75 | 7,332                                | 4,493   | Fasting glucose             | Yes                                         | Lab                                                           |         |       |
| 526 | Japan      | 1999       | National Nutrition Survey                                                                    | National                    | both                  | 20+                                   | 20+   | 1,013                                | 920     | Fasting glucose             | No                                          | Lab                                                           |         |       |
| 527 | Japan      | 2000       | Niigata Study                                                                                | Community                   | urban                 | 72                                    | 72    | 171                                  | 212     | HbA1c                       | No                                          |                                                               | Lab     |       |
| 528 | Japan      | 2000       | National Nutrition Survey and National Cardiovascular Survey                                 | National                    | both                  | 20+                                   | 20+   | 1,219                                | 1,073   | Fasting glucose             | No                                          | Lab                                                           |         |       |
| 529 | Japan      | 2001       | Nakagami et al., Diabetologia 46:1063-70, 2003                                               | Community                   | rural                 | 35+                                   | 35+   | 1,016                                | 783     | Fasting glucose             | No                                          | Unknown                                                       |         |       |
| 530 | Japan      | 2001       | The Japan Association of Health Service Database                                             | Subnational                 | both                  | 20+                                   | 20+   | 298,123                              | 323,553 | Fasting glucose, HbA1c      | No                                          | Lab                                                           | Lab     |       |
| 531 | Japan      | 2001       | Niigata Study                                                                                | Community                   | urban                 | 73                                    | 73    | 196                                  | 234     | HbA1c                       | No                                          |                                                               | Lab     |       |
| 532 | Japan      | 2001       | National Nutrition Survey                                                                    | National                    | both                  | 20+                                   | 20+   | 1,088                                | 968     | Fasting glucose             | No                                          | Lab                                                           |         |       |
| 533 | Japan      | 2002       | Niigata Study                                                                                | Community                   | urban                 | 74                                    | 74    | 185                                  | 211     | HbA1c                       | No                                          |                                                               | Lab     |       |
| 534 | Japan      | 2002       | National Nutrition Survey                                                                    | National                    | both                  | 20+                                   | 20+   | 1,072                                | 952     | Fasting glucose             | No                                          | Lab                                                           |         |       |
| 535 | Japan      | 2002-2003  | The Hisayama Study                                                                           | Community                   | rural                 | 40+                                   | 40+   | 1,837                                | 1,391   | Fasting glucose, HbA1c      | Yes                                         | Lab                                                           | Lab     |       |
| 536 | Japan      | 2003       | National Health and Nutrition Survey                                                         | National                    | both                  | 20+                                   | 20+   | 3,534                                | 2,475   | Fasting glucose, HbA1c      | Yes                                         | Lab                                                           | Lab     |       |
| 537 | Japan      | 2003       | Niigata Study                                                                                | Community                   | urban                 | 75                                    | 75    | 191                                  | 215     | HbA1c                       | No                                          |                                                               | Lab     |       |
| 538 | Japan      | 2004       | National Health and Nutrition Survey                                                         | National                    | both                  | 20+                                   | 20+   | 2,700                                | 1,879   | Fasting glucose, HbA1c      | Yes                                         | Lab                                                           | Lab     |       |
| 539 | Japan      | 2004       | Niigata Study                                                                                | Community                   | urban                 | 76                                    | 76    | 184                                  | 212     | HbA1c                       | No                                          |                                                               | Lab     |       |
| 540 | Japan      | 2003-2006  | The Japan Public Health Center-based Prospective Diabetes study: JPHC Diabetes study         | Subnational                 | both                  | 51-80                                 | 51-81 | 4,731                                | 3,068   | Fasting glucose, HbA1c      | Yes                                         | Unknown                                                       | Lab     |       |
| 541 | Japan      | 2005       | National Health and Nutrition Survey                                                         | National                    | both                  | 20+                                   | 20+   | 2,540                                | 1,824   | Fasting glucose, HbA1c      | Yes                                         | Lab                                                           | Lab     |       |
| 542 | Japan      | 2005       | Niigata Study                                                                                | Community                   | urban                 | 77                                    | 77    | 189                                  | 202     | HbA1c                       | No                                          |                                                               | Lab     |       |
| 543 | Japan      | 2006       | National Health and Nutrition Survey                                                         | National                    | both                  | 20+                                   | 20+   | 2,862                                | 2,055   | Fasting glucose, HbA1c      | Yes                                         | Lab                                                           | Lab     |       |
| 544 | Japan      | 2006       | Niigata Study                                                                                | Community                   | urban                 | 78                                    | 78    | 193                                  | 190     | HbA1c                       | No                                          |                                                               | Lab     |       |
| 545 | Japan      | 2007       | National Health and Nutrition Survey                                                         | National                    | both                  | 20+                                   | 20+   | 2,734                                | 1,976   | Fasting glucose, HbA1c      | Yes                                         | Lab                                                           | Lab     |       |
| 546 | Japan      | 2007       | Niigata Study                                                                                | Community                   | urban                 | 79                                    | 79    | 192                                  | 181     | HbA1c                       | No                                          |                                                               | Lab     |       |
| 547 | Japan      | 2008       | Study on residents in Kanazawa City aged over 40                                             | Community                   | urban                 | 40+                                   | 40+   | 11,944                               | 6,562   | Fasting glucose             | No                                          | Unknown                                                       |         |       |
| 548 | Japan      | 2008       | National Health and Nutrition Survey                                                         | National                    | both                  | 20+                                   | 20+   | 2,939                                | 2,149   | Fasting glucose, HbA1c      | Yes                                         | Lab                                                           | Lab     |       |
| 549 | Japan      | 2008       | Niigata Study                                                                                | Community                   | urban                 | 80                                    | 80    | 162                                  | 160     | HbA1c                       | No                                          |                                                               | Lab     |       |
| 550 | Japan      | 2009       | National Health and Nutrition Survey                                                         | National                    | both                  | 20+                                   | 20+   | 2,851                                | 2,018   | Fasting glucose, HbA1c      | Yes                                         | Lab                                                           | Lab     |       |
| 551 | Japan      | 2010       | National Health and Nutrition Survey                                                         | National                    | both                  | 20+                                   | 20+   | 2,649                                | 1,977   | Fasting glucose, HbA1c      | Yes                                         | Lab                                                           | Lab     |       |
| 552 | Japan      | 2011       | National Health and Nutrition Survey                                                         | National                    | both                  | 20+                                   | 20+   | 2,411                                | 1,776   | Fasting glucose, HbA1c      | Yes                                         | Lab                                                           | Lab     |       |
| 553 | Japan      | 2011       | The Tokyo Health Service Association Database                                                | Community                   | urban                 | 20+                                   | 20+   | 5,232                                | 6,426   | Fasting glucose, HbA1c      | No                                          | Lab                                                           | Lab     |       |
| 554 | Japan      | 2012       | National Health and Nutrition Survey                                                         | National                    | both                  | 20+                                   | 20+   | 9,670                                | 7,007   | HbA1c                       | Yes                                         |                                                               | Lab     |       |
| 555 | Japan      | 2013       | National Health and Nutrition Survey                                                         | National                    | both                  | 20+                                   | 20+   | 2,310                                | 1,765   | Fasting glucose, HbA1c      | Yes                                         | Lab                                                           | Lab     |       |
| 556 | Japan      | 2011-2016  | Japan Public Health Center-based Prospective Study for the Next Generation (JPHC-NEXT Study) | Subnational                 | both                  | 40-73                                 | 40-73 | 5,629                                | 5,003   | Fasting glucose, HbA1c      | Yes                                         | Unknown                                                       | Lab     |       |
| 557 | Japan      | 2012-2016  | The Nagahama Study                                                                           | Community                   | rural                 | 35-80                                 | 35-80 | 6,107                                | 2,915   | Fasting glucose, HbA1c      | Yes                                         | Lab                                                           | Lab     |       |
| 558 | Japan      | 2014       | National Health and Nutrition Survey                                                         | National                    | both                  | 20+                                   | 20+   | 2,396                                | 1,843   | Fasting glucose, HbA1c      | Yes                                         | Lab                                                           | Lab     |       |
| 559 | Japan      | 2015       | National Health and Nutrition Survey                                                         | National                    | both                  | 20+                                   | 20+   | 2,297                                | 1,662   | Fasting glucose, HbA1c      | Yes                                         | Lab                                                           | Lab     |       |
| 560 | Japan      | 2016       | National Health and Nutrition Survey                                                         | National                    | both                  | 20+                                   | 20+   | 7,918                                | 5,819   | HbA1c                       | Yes                                         |                                                               | Lab     |       |
| 561 | Japan      | 2017       | National Health and Nutrition Survey                                                         | National                    | both                  | 20+                                   | 20+   | 2,037                                | 1,556   | Fasting glucose, HbA1c      | Yes                                         | Lab                                                           | Lab     |       |
| 562 | Japan      | 2015-2019  | The Shizuoka KDB study                                                                       | Subnational                 | both                  | 75-90                                 | 75-90 | 4,337                                | 2,109   | Fasting glucose, HbA1c      | Yes                                         | Lab                                                           | Lab     |       |
| 563 | Japan      | 2017       | The Tokyo Health Service Association Database                                                | Community                   | urban                 | 20+                                   | 20+   | 14,915                               | 27,734  | Fasting glucose, HbA1c      | Yes                                         | Unknown                                                       | Unknown |       |
| 564 | Japan      | 2018       | National Health and Nutrition Survey                                                         | National                    | both                  | 20+                                   | 20+   | 2,041                                | 1,528   | Fasting glucose, HbA1c      | Yes                                         | Lab                                                           | Lab     |       |
| 565 | Japan      | 2019       | National Health and Nutrition Survey                                                         | National                    | both                  | 20+                                   | 20+   | 1,645                                | 1,260   | Fasting glucose, HbA1c      | Yes                                         | Lab                                                           | Lab     |       |
| 566 | Japan      | 2022-2023  | The Tokyo Health Service Association Database                                                | Community                   | urban                 | 20-79                                 | 20-79 | 28,652                               | 43,488  | Fasting glucose, HbA1c      | Yes                                         | Lab                                                           | Lab     |       |
| 567 | Jordan     | 2004       | Behavioural Risk Factor Surveillance Survey                                                  | National                    | rural                 | 18+                                   | 18+   | 1,974                                | 1,351   | Fasting glucose             | Yes                                         | Lab                                                           |         |       |
| 568 | Jordan     | 2007       | Behavioural Risk Factor Surveillance Survey                                                  | National                    | both                  | 18+                                   | 18+   | 1,705                                | 1,949   | Fasting glucose             | Yes                                         | Lab                                                           |         |       |
| 569 | Jordan     | 2009       | Metabolic abnormalities and vitamin D study                                                  | National                    | both                  | 18+                                   | 18+   | 3,355                                | 1,144   | Fasting glucose             | Yes                                         | Lab                                                           |         |       |
| 570 | Jordan     | 2016-2017  | National Cardiovascular Diseases and Diabetes Study (NCDDS)                                  | National                    | both                  | 18+                                   | 18+   | 2,763                                | 1,182   | Fasting glucose, HbA1c      | Yes                                         | Portable                                                      | Lab     |       |
| 571 | Jordan     | 2019       | STEPS                                                                                        | National                    | both                  | 18-69                                 | 18-69 | 3,324                                | 2,202   | Fasting glucose             | Yes                                         | Portable                                                      |         |       |
| 572 | Kazakhstan | 2011-2012  | Household Health Survey                                                                      | National                    | both                  | 18+                                   | 18+   | 539                                  | 399     | Fasting glucose             | No                                          | Portable                                                      |         |       |
| 573 | Kazakhstan | 2015       | Almaty STEPS                                                                                 | Subnational                 | both                  | 18-69                                 | 18-69 | 1,138                                | 377     | Fasting glucose             | Yes                                         | Lab                                                           |         |       |
| 574 | Kazakhstan | 2015       | Shymkent STEPS                                                                               | Subnational                 | both                  | 18-69                                 | 18-69 | 925                                  | 428     | Fasting glucose             | Yes                                         | Lab                                                           |         |       |
| 575 | Kazakhstan | 2015-2016  | Aktobe STEPS                                                                                 | Subnational                 | both                  | 18-69                                 | 18-69 | 1,138                                | 347     | Fasting glucose             | Yes                                         | Lab                                                           |         |       |
| 576 | Kazakhstan | 2019       | A health status assessment of a population of Karaganda urban region                         | Community                   | urban                 | 18+                                   | 18+   | 664                                  | 315     | Fasting glucose, HbA1c      | No                                          | Lab                                                           | Lab     |       |
| 577 | Kazakhstan | 2021       | Prevalence of NCD Risk Factors in Kazakhstan                                                 | Subnational                 | both                  | 18-69                                 | 18-69 | 813                                  | 801     | Fasting glucose, HbA1c      | Yes                                         | Lab                                                           | Lab     |       |
| 578 | Kazakhstan | 2021-2022  | Prevalence of risk factors for NCD in Kazakhstan                                             | National                    | both                  | 18-69                                 | 18-69 | 1,997                                | 1,811   | Fasting glucose, HbA1c      | Yes                                         | Lab                                                           | Lab     |       |
| 579 | Kenya      | 2015       | STEPS                                                                                        | National                    | both                  | 18-69                                 | 18-69 | 2,527                                | 1,763   | Fasting glucose             | Yes                                         | Unknown                                                       |         |       |
| 580 | Kiribati   | 1981       | Epidemiological survey of Kiribati                                                           | Subnational                 | rural                 | 20+                                   | 20+   | 533                                  | 474     | Fasting glucose             | Yes                                         | Lab                                                           |         |       |
| 581 | Kiribati   | 1981       | Epidemiological survey of Kiribati                                                           | Subnational                 | urban                 | 20+                                   | 20+   | 879                                  | 917     | Fasting glucose             | Yes                                         | Lab                                                           |         |       |
| 582 | Kiribati   | 2004       | STEPS                                                                                        | National                    | both                  | 18-64                                 | 18-64 | 897                                  | 727     | Fasting glucose             | Yes                                         | Portable                                                      |         |       |
| 583 | Kiribati   | 2015-2016  | STEPS                                                                                        | National                    | both                  | 18-69                                 | 18-69 | 1,141                                | 963     | Fasting glucose             | Yes                                         | Portable                                                      |         |       |
| 584 | Kuwait     | 2006       | STEPS                                                                                        | National                    | both                  | 20-64                                 | 20-64 | 1,298                                | 918     | Fasting glucose             | Yes                                         | Lab                                                           |         |       |



|     | Country          | Data years | Survey/Study name/Citation                                                 | Level of representativeness | Rural, urban, or both | Age range as used for global analysis |       | Sample size used for global analysis |        | Glycaemic markers available | Information available on diabetes treatment | Whether measured in a laboratory or by a point-of-care portable device |          | Notes |
|-----|------------------|------------|----------------------------------------------------------------------------|-----------------------------|-----------------------|---------------------------------------|-------|--------------------------------------|--------|-----------------------------|---------------------------------------------|------------------------------------------------------------------------|----------|-------|
|     |                  |            |                                                                            |                             |                       | Female                                | Male  | Female                               | Male   |                             |                                             | Glucose                                                                | HbA1c    |       |
| 585 | Kuwait           | 2008-2009  | National Nutrition Program for the State of Kuwait                         | National                    | both                  | 18-86                                 | 18-86 | 530                                  | 459    | Fasting glucose, HbA1c      | Yes                                         | Lab                                                                    | Lab      | 15    |
| 586 | Kuwait           | 2011-2014  | Kuwait Diabetes Epidemiology Program                                       | National                    | both                  | 18-82                                 | 18-82 | 2,144                                | 2,781  | Fasting glucose, HbA1c      | Yes                                         | Lab                                                                    | Lab      |       |
| 587 | Kuwait           | 2014       | STEPS                                                                      | National                    | both                  | 18-69                                 | 18-69 | 2,406                                | 1,458  | Fasting glucose, HbA1c      | Yes                                         | Lab                                                                    | Lab      |       |
| 588 | Kyrgyzstan       | 2013       | STEPS                                                                      | National                    | both                  | 25-64                                 | 25-64 | 1,605                                | 946    | Fasting glucose             | Yes                                         | Portable                                                               |          |       |
| 589 | Lao PDR          | 2013       | STEPS                                                                      | National                    | both                  | 18-64                                 | 18-64 | 1,471                                | 989    | Fasting glucose             | Yes                                         | Portable                                                               |          |       |
| 590 | Latvia           | 2008-2009  | Cardiovascular risk factor study                                           | National                    | both                  | 25-74                                 | 25-74 | 2,394                                | 1,359  | Fasting glucose             | No                                          | Lab                                                                    |          |       |
| 591 | Lebanon          | 2017       | STEPS                                                                      | National                    | both                  | 18-69                                 | 18-69 | 1,086                                | 790    | Fasting glucose             | Yes                                         | Lab                                                                    |          |       |
| 592 | Lebanon          | 2023-2024  | STEPS                                                                      | National                    | both                  | 18-69                                 | 18-69 | 1,820                                | 1,053  | Fasting glucose, HbA1c      | Yes                                         | Portable                                                               | Unknown  | 2     |
| 593 | Lesotho          | 2012       | STEPS                                                                      | National                    | both                  | 25-64                                 | 25-64 | 1,492                                | 774    | Fasting glucose             | Yes                                         | Portable                                                               |          |       |
| 594 | Liberia          | 2011       | STEPS                                                                      | Subnational                 | both                  | 25-64                                 | 25-64 | 1,316                                | 1,060  | Fasting glucose             | Yes                                         | Portable                                                               |          |       |
| 595 | Liberia          | 2022       | STEPS                                                                      | National                    | both                  | 18-69                                 | 18-69 | 2,367                                | 1,532  | Fasting glucose             | Yes                                         | Portable                                                               |          |       |
| 596 | Libya            | 1999       | Kadiki et al., Diabetes Metab 27:647-54, 2001                              | Community                   | both                  | 25-84                                 | 25-84 | 388                                  | 211    | Fasting glucose             | No                                          | Unknown                                                                |          |       |
| 597 | Libya            | 2009       | STEPS                                                                      | National                    | both                  | 25-64                                 | 25-64 | 1,622                                | 1,712  | Fasting glucose             | Yes                                         | Portable                                                               |          |       |
| 598 | Libya            | 2022-2023  | STEPS                                                                      | National                    | both                  | 18-69                                 | 18-69 | 2,599                                | 2,271  | Fasting glucose, HbA1c      | Yes                                         | Portable                                                               | Lab      | 2     |
| 599 | Lithuania        | 2001-2002  | MONICA4                                                                    | Community                   | urban                 | 35-64                                 | 35-64 | 760                                  | 609    | Fasting glucose             | Yes                                         | Portable                                                               |          |       |
| 600 | Lithuania        | 2006-2008  | Health, Alcohol and Psychosocial Factors In Eastern Europe                 | Community                   | urban                 | 45-70                                 | 45-70 | 3,497                                | 2,906  | Fasting glucose             | Yes                                         | Portable                                                               |          |       |
| 601 | Luxembourg       | 2007-2009  | Observation of cardiovascular risk factors in Luxembourg (ORISCAV-LUX)     | National                    | both                  | 18-69                                 | 18-69 | 735                                  | 697    | Fasting glucose, HbA1c      | Yes                                         | Lab                                                                    | Lab      |       |
| 602 | Luxembourg       | 2013-2015  | European Health Examination Survey in Luxembourg                           | National                    | both                  | 25-64                                 | 25-64 | 781                                  | 721    | Fasting glucose, HbA1c      | Yes                                         | Lab                                                                    | Lab      |       |
| 603 | Luxembourg       | 2016-2018  | Observation of cardiovascular risk factors in Luxembourg (ORISCAV-LUX2)    | Community                   | both                  | 25-79                                 | 25-79 | 825                                  | 731    | Fasting glucose, HbA1c      | Yes                                         | Lab                                                                    | Lab      |       |
| 604 | Malawi           | 2009       | STEPS                                                                      | National                    | both                  | 25-64                                 | 25-64 | 3,252                                | 1,690  | Fasting glucose             | Yes                                         | Portable                                                               |          |       |
| 605 | Malawi           | 2013-2017  | NCD Survey Malawi Epidemiology and Intervention Research Unit              | Community                   | rural                 | 18+                                   | 18+   | 7,497                                | 5,830  | Fasting glucose             | Yes                                         | Lab                                                                    |          |       |
| 606 | Malawi           | 2013-2017  | NCD Survey Malawi Epidemiology and Intervention Research Unit              | Community                   | urban                 | 18+                                   | 18+   | 10,291                               | 5,799  | Fasting glucose             | Yes                                         | Lab                                                                    |          |       |
| 607 | Malawi           | 2017       | STEPS                                                                      | National                    | both                  | 18-69                                 | 18-69 | 2,560                                | 1,485  | Fasting glucose             | Yes                                         | Portable                                                               |          |       |
| 608 | Malaysia         | 2004       | Rampal et al., Public Health 122(1):11-8, 2008                             | National                    | both                  | 18+                                   | 18+   | 9,840                                | 7,362  | Fasting glucose             | Yes                                         | Lab                                                                    |          |       |
| 609 | Malaysia         | 2006       | National Health and Morbidity Survey (NHMS)                                | National                    | both                  | 18+                                   | 18+   | 18,176                               | 15,274 | Fasting glucose             | Yes                                         | Portable                                                               |          |       |
| 610 | Malaysia         | 2008       | Metabolic Syndrome Study in Malaysia                                       | National                    | rural                 | 18+                                   | 18+   | 1,360                                | 749    | Fasting glucose, HbA1c      | Yes                                         | Lab                                                                    | Lab      |       |
| 611 | Malaysia         | 2008       | Metabolic Syndrome Study in Malaysia                                       | National                    | urban                 | 18+                                   | 18+   | 1,435                                | 765    | Fasting glucose, HbA1c      | Yes                                         | Lab                                                                    | Lab      |       |
| 612 | Malaysia         | 2011       | National Health and Morbidity Survey (NHMS)                                | National                    | both                  | 18+                                   | 18+   | 8,844                                | 8,090  | Fasting glucose             | Yes                                         | Portable                                                               |          |       |
| 613 | Malaysia         | 2015       | National Health and Morbidity Survey (NHMS)                                | National                    | both                  | 18+                                   | 18+   | 10,411                               | 9,439  | Fasting glucose             | Yes                                         | Portable                                                               |          |       |
| 614 | Malaysia         | 2019       | National Health and Morbidity Survey (NHMS)                                | National                    | both                  | 18+                                   | 18+   | 5,555                                | 4,783  | Fasting glucose             | Yes                                         | Portable                                                               |          |       |
| 615 | Maldives         | 2004       | STEPS                                                                      | Subnational                 | urban                 | 25-64                                 | 25-64 | 839                                  | 716    | Fasting glucose             | No                                          | Lab                                                                    |          |       |
| 616 | Maldives         | 2020-2021  | STEPS                                                                      | National                    | both                  | 18-69                                 | 18-69 | 1,994                                | 886    | Fasting glucose             | Yes                                         | Portable                                                               |          |       |
| 617 | Mali             | 2013       | STEPS                                                                      | Subnational                 | both                  | 18-65                                 | 18-65 | 805                                  | 446    | Fasting glucose             | Yes                                         | Portable                                                               |          |       |
| 618 | Malta            | 1981       | DECODE; DECODE Study Group, Diabetes Care 26:61-9, 2003                    | Community                   | both                  | 30-89                                 | 30-89 | 1,173                                | 870    | Fasting glucose             | No                                          | Unknown                                                                |          |       |
| 619 | Malta            | 2014-2016  | SAHYTEK - The University of Malta Health and Wellbeing Study               | National                    | both                  | 18-70                                 | 18-70 | 1,022                                | 834    | Fasting glucose             | Yes                                         | Lab                                                                    |          |       |
| 620 | Marshall Islands | 2002       | STEPS                                                                      | National                    | both                  | 18-64                                 | 18-64 | 1,532                                | 1,081  | Fasting glucose             | Yes                                         | Portable                                                               |          |       |
| 621 | Marshall Islands | 2017-2018  | STEPS                                                                      | National                    | both                  | 18+                                   | 18+   | 1,556                                | 1,406  | Fasting glucose             | Yes                                         | Unknown                                                                |          |       |
| 622 | Mauritania       | 2006       | STEPS                                                                      | Community                   | urban                 | 18-64                                 | 18-64 | 1,126                                | 1,023  | Fasting glucose             | Yes                                         | Lab                                                                    |          |       |
| 623 | Mauritius        | 1987       | Mauritius Noncommunicable Disease Survey                                   | National                    | both                  | 25-74                                 | 25-74 | 2,662                                | 2,355  | Fasting glucose             | Yes                                         | Lab                                                                    |          |       |
| 624 | Mauritius        | 1992       | Mauritius Noncommunicable Disease Survey                                   | National                    | both                  | 25-74                                 | 25-74 | 3,481                                | 2,994  | Fasting glucose             | Yes                                         | Lab                                                                    |          |       |
| 625 | Mauritius        | 1992       | Rodrigues, Mauritius (1992)                                                | Community                   | rural                 | 25-64                                 | 25-64 | 774                                  | 737    | Fasting glucose             | Yes                                         | Lab                                                                    |          |       |
| 626 | Mauritius        | 1998       | Mauritius Noncommunicable Disease Survey                                   | National                    | both                  | 25-74                                 | 25-74 | 3,248                                | 2,567  | Fasting glucose             | Yes                                         | Lab                                                                    |          |       |
| 627 | Mauritius        | 1999       | Rodrigues, Mauritius (1999)                                                | Community                   | rural                 | 20+                                   | 20+   | 1,295                                | 977    | Fasting glucose             | Yes                                         | Lab                                                                    |          |       |
| 628 | Mauritius        | 2009       | Mauritius Noncommunicable Disease Survey                                   | National                    | both                  | 19-74                                 | 19-74 | 3,432                                | 2,903  | Fasting glucose             | Yes                                         | Lab                                                                    |          |       |
| 629 | Mauritius        | 2015       | Mauritius Noncommunicable Disease Survey                                   | National                    | both                  | 20-74                                 | 20-74 | 1,948                                | 1,626  | Fasting glucose, HbA1c      | Yes                                         | Lab                                                                    | Lab      |       |
| 630 | Mauritius        | 2015       | Mauritius Noncommunicable Disease Survey 1998 Follow Up                    | National                    | both                  | 20+                                   | 20+   | 1,171                                | 886    | Fasting glucose, HbA1c      | Yes                                         | Lab                                                                    | Lab      |       |
| 631 | Mexico           | 2004-2005  | CArdiovascular Risk factors Multiple Evaluation in Latin America (CARMELA) | Community                   | urban                 | 25-64                                 | 25-64 | 889                                  | 833    | Fasting glucose             | Yes                                         | Lab                                                                    |          |       |
| 632 | Mexico           | 2006       | Encuesta Nacional de Salud y Nutrición                                     | National                    | both                  | 20+                                   | 20+   | 24,881                               | 19,673 | Fasting glucose             | Yes                                         | Unknown                                                                |          |       |
| 633 | Mexico           | 2009-2012  | Encuesta Nacional Sobre Niveles de vida de los Hogares                     | National                    | both                  | 18+                                   | 18+   | 10,495                               | 8,215  | HbA1c                       | Yes                                         |                                                                        | Portable |       |
| 634 | Mexico           | 2012       | The Mexican Health and Aging Study                                         | National                    | both                  | 50+                                   | 50+   | 8,399                                | 6,441  | HbA1c                       | Yes                                         |                                                                        | Portable |       |
| 635 | Mexico           | 2016       | Encuesta Nacional de Salud y Nutrición                                     | National                    | both                  | 20+                                   | 20+   | 5,477                                | 2,865  | Fasting glucose, HbA1c      | Yes                                         | Lab                                                                    | Lab      |       |
| 636 | Mexico           | 2016       | Cognitive Aging Linked to MHAS (Mex-Cog)                                   | National                    | both                  | 55+                                   | 55+   | 1,191                                | 833    | HbA1c                       | Yes                                         |                                                                        | Portable | 16    |
| 637 | Mexico           | 2018-2019  | Encuesta Nacional de Salud y Nutrición                                     | National                    | both                  | 20+                                   | 20+   | 9,798                                | 7,584  | Fasting glucose, HbA1c      | Yes                                         | Lab                                                                    | Lab      |       |
| 638 | Mexico           | 2020       | Encuesta Nacional de Salud y Nutrición                                     | National                    | both                  | 20+                                   | 20+   | 1,359                                | 932    | Fasting glucose, HbA1c      | No                                          | Lab                                                                    | Lab      |       |
| 639 | Mexico           | 2021       | Encuesta Nacional de Salud y Nutrición                                     | National                    | both                  | 20+                                   | 20+   | 5,243                                | 2,947  | Fasting glucose, HbA1c      | Yes                                         | Lab                                                                    | Lab      |       |
| 640 | Mexico           | 2022       | Encuesta Nacional de Salud y Nutrición                                     | National                    | both                  | 20+                                   | 20+   | 6,627                                | 4,338  | Fasting glucose, HbA1c      | Yes                                         | Lab                                                                    | Lab      |       |
| 641 | Micronesia       | 2002       | STEPS                                                                      | Subnational                 | both                  | 25-64                                 | 25-64 | 866                                  | 580    | Fasting glucose             | Yes                                         | Lab                                                                    |          |       |
| 642 | Micronesia       | 2006       | STEPS                                                                      | Subnational                 | both                  | 25-64                                 | 25-64 | 1,246                                | 702    | Fasting glucose             | Yes                                         | Unknown                                                                |          |       |
| 643 | Micronesia       | 2008       | STEPS                                                                      | Subnational                 | both                  | 25-64                                 | 25-64 | 1,255                                | 857    | Fasting glucose             | Yes                                         | Unknown                                                                |          |       |
| 644 | Micronesia       | 2009       | STEPS, Kosrae                                                              | Subnational                 | both                  | 18-64                                 | 18-64 | 446                                  | 246    | Fasting glucose             | Yes                                         | Portable                                                               |          |       |
| 645 | Micronesia       | 2009       | STEPS, Yap                                                                 | Subnational                 | both                  | 18-64                                 | 18-64 | 562                                  | 435    | Fasting glucose             | Yes                                         | Unknown                                                                |          |       |
| 646 | Moldova          | 2013       | STEPS                                                                      | National                    | both                  | 18-69                                 | 18-69 | 2,893                                | 1,806  | Fasting glucose             | Yes                                         | Portable                                                               |          |       |
| 647 | Moldova          | 2021       | STEPS                                                                      | National                    | both                  | 18-69                                 | 18-69 | 2,289                                | 1,774  | Fasting glucose             | Yes                                         | Portable                                                               |          |       |
| 648 | Mongolia         | 2005       | STEPS                                                                      | National                    | both                  | 25-64                                 | 25-64 | 1,374                                | 1,323  | Fasting glucose             | Yes                                         | Portable                                                               |          |       |
| 649 | Mongolia         | 2009       | STEPS                                                                      | National                    | both                  | 25-64                                 | 25-64 | 2,658                                | 1,814  | Fasting glucose             | Yes                                         | Unknown                                                                |          |       |
| 650 | Mongolia         | 2013       | STEPS                                                                      | National                    | both                  | 25-64                                 | 25-64 | 2,366                                | 1,921  | Fasting glucose             | Yes                                         | Portable                                                               |          |       |

|     | Country          | Data years | Survey/Study name/Citation                                                                                                           | Level of representativeness | Rural, urban, or both | Age range as used for global analysis |        | Sample size used for global analysis |        | Glycaemic markers available | Information available on diabetes treatment | Whether measured in a laboratory or by a point-of-care portable device |       | Notes |
|-----|------------------|------------|--------------------------------------------------------------------------------------------------------------------------------------|-----------------------------|-----------------------|---------------------------------------|--------|--------------------------------------|--------|-----------------------------|---------------------------------------------|------------------------------------------------------------------------|-------|-------|
|     |                  |            |                                                                                                                                      |                             |                       | Female                                | Male   | Female                               | Male   |                             |                                             | Glucose                                                                | HbA1c |       |
| 651 | Mongolia         | 2019       | STEPS                                                                                                                                | National                    | both                  | 18-69                                 | 18-69  | 3,481                                | 2,885  | Fasting glucose             | Yes                                         | Portable                                                               |       |       |
| 652 | Morocco          | 2000       | National Survey 2000                                                                                                                 | National                    | both                  | 20-89                                 | 20-89  | 973                                  | 689    | Fasting glucose             | No                                          | Lab                                                                    |       |       |
| 653 | Morocco          | 2017       | STEPS                                                                                                                                | National                    | both                  | 18+                                   | 18+    | 3,417                                | 1,891  | Fasting glucose             | Yes                                         | Portable                                                               |       |       |
| 654 | Mozambique       | 2014-2015  | STEPS                                                                                                                                | National                    | both                  | 18-64                                 | 18-64  | 1,644                                | 1,111  | Fasting glucose             | Yes                                         | Portable                                                               |       |       |
| 655 | Myanmar          | 2003-2004  | STEPS                                                                                                                                | Subnational                 | both                  | 25-74                                 | 25-74  | 2,453                                | 1,991  | Fasting glucose             | Yes                                         | Lab                                                                    |       |       |
| 656 | Myanmar          | 2014       | National survey of Diabetes Mellitus and risk factors for Non-communicable diseases in Myanmar                                       | National                    | both                  | 25-64                                 | 25-64  | 5,592                                | 3,079  | Fasting glucose             | Yes                                         | Portable                                                               |       |       |
| 657 | Myanmar          | 2013-2014  | STEPS, Yangon                                                                                                                        | Subnational                 | both                  | 25-74                                 | 25-74  | 740                                  | 745    | Fasting glucose             | Yes                                         | Lab                                                                    |       |       |
| 658 | Namibia          | 2013       | Demographic and Health Survey Namibia 2013                                                                                           | National                    | both                  | 35-64                                 | 35-64  | 2,054                                | 1,551  | Fasting glucose             | Yes                                         | Portable                                                               |       |       |
| 659 | Nauru            | 1982       | Trends in the prevalence and incidence of non-insulin-dependent diabetes mellitus and impaired glucose tolerance                     | National                    | both                  | 20+                                   | 20+    | 775                                  | 706    | Fasting glucose             | Yes                                         | Unknown                                                                |       |       |
| 660 | Nauru            | 1987       | Trends in the prevalence and incidence of non-insulin-dependent diabetes mellitus and impaired glucose tolerance                     | National                    | both                  | 20+                                   | 20+    | 662                                  | 554    | Fasting glucose             | Yes                                         | Lab                                                                    |       |       |
| 661 | Nauru            | 1994       | Trends in the prevalence and incidence of non-insulin-dependent diabetes mellitus and impaired glucose tolerance                     | National                    | both                  | 25+                                   | 25+    | 735                                  | 652    | Fasting glucose             | Yes                                         | Lab                                                                    |       |       |
| 662 | Nauru            | 2006       | STEPS                                                                                                                                | National                    | both                  | 18-65                                 | 18-65  | 231                                  | 245    | Fasting glucose             | Yes                                         | Lab                                                                    |       |       |
| 663 | Nauru            | 2015       | STEPS                                                                                                                                | National                    | both                  | 18-69                                 | 18-69  | 704                                  | 649    | Fasting glucose             | Yes                                         | Portable                                                               |       |       |
| 664 | Nepal            | 1990       | Sasaki et al., Diabetes Res Clin Pract 67:167-74, 2005                                                                               | Community                   | rural                 | 20+                                   | 20+    | 85                                   | 85     | Fasting glucose             | No                                          | Unknown                                                                |       |       |
| 665 | Nepal            | 2000       | Singh et al., Diabet Med 20:170-1, 2003                                                                                              | Subnational                 | rural                 | 20+                                   | 20+    | 235                                  | 105    | Fasting glucose             | No                                          | Unknown                                                                |       |       |
| 666 | Nepal            | 2000       | Singh et al., Diabet Med 20:170-1, 2003                                                                                              | Subnational                 | urban                 | 20+                                   | 20+    | 456                                  | 442    | Fasting glucose             | No                                          | Unknown                                                                |       |       |
| 667 | Nepal            | 2006-2011  | Early detection and management of Kidney disease, Hypertension, Diabetes and Cardiovascular disease (KHDC Nepal), Tarahara           | Community                   | rural                 | 18+                                   | 18+    | 2,351                                | 1,176  | Fasting glucose             | Yes                                         | Lab                                                                    |       |       |
| 668 | Nepal            | 2006-2011  | Early detection and management of Kidney disease, Hypertension, Diabetes and Cardiovascular disease (KHDC Nepal), Damak              | Community                   | urban                 | 18+                                   | 18+    | 1,577                                | 1,095  | Fasting glucose             | Yes                                         | Lab                                                                    |       |       |
| 669 | Nepal            | 2006-2011  | Early detection and management of Kidney disease, Hypertension, Diabetes and Cardiovascular disease (KHDC Nepal), Dharan             | Community                   | urban                 | 18+                                   | 18+    | 6,130                                | 4,130  | Fasting glucose             | Yes                                         | Lab                                                                    |       |       |
| 670 | Nepal            | 2012-2013  | STEPS                                                                                                                                | National                    | both                  | 18-69                                 | 18-69  | 2,702                                | 1,276  | Fasting glucose             | Yes                                         | Lab                                                                    |       |       |
| 671 | Nepal            | 2015       | Community based intervention for prevention and control of non-communicable diseases risk factors (CIPCON) baseline survey, Dhankuta | Subnational                 | rural                 | 18-69                                 | 18-69  | 779                                  | 555    | Fasting glucose             | Yes                                         | Lab                                                                    |       |       |
| 672 | Nepal            | 2015       | Community based intervention for prevention and control of non-communicable diseases risk factors (CIPCON) baseline survey, Ilam     | Subnational                 | rural                 | 18-69                                 | 18-69  | 717                                  | 553    | Fasting glucose             | Yes                                         | Lab                                                                    |       |       |
| 673 | Nepal            | 2016-2018  | The Population Based Prevalence of Selected Non-Communicable Diseases In Nepal                                                       | National                    | both                  | 20+                                   | 20+    | 7,423                                | 4,834  | Fasting glucose             | Yes                                         | Lab                                                                    |       |       |
| 674 | Nepal            | 2019       | STEPS                                                                                                                                | National                    | both                  | 18-69                                 | 18-69  | 3,400                                | 1,910  | Fasting glucose             | Yes                                         | Portable                                                               |       |       |
| 675 | Netherlands      | 1990       | DECODE; DECODE Study Group, Diabetes Care 26:61-9, 2003                                                                              | Community                   | urban                 | 50-79                                 | 50-79  | 1,322                                | 1,131  | Fasting glucose             | No                                          | Unknown                                                                |       |       |
| 676 | Netherlands      | 1990       | Zuiphen Elderly Study                                                                                                                | Community                   | urban                 | 69-90                                 | 69-90  | 555                                  | 555    | Fasting glucose             | Yes                                         | Lab                                                                    |       |       |
| 677 | Netherlands      | 1995-1996  | The Longitudinal Aging Study Amsterdam (LASA)                                                                                        | Subnational                 | both                  | 65-88                                 | 65-88  | 780                                  | 725    | Fasting glucose             | Yes                                         | Unknown                                                                | 17    |       |
| 678 | Netherlands      | 1998-2001  | Regenboog Project                                                                                                                    | National                    | both                  | 18-89                                 | 18-89  | 2,305                                | 2,323  | Fasting glucose             | Yes                                         | Lab                                                                    |       |       |
| 679 | Netherlands      | 2001-2003  | Surinamese in the Netherlands: Study on Ethnicity and Health (SUNSET)                                                                | Community                   | urban                 | 35-60                                 | 35-60  | 257                                  | 251    | Fasting glucose             | Yes                                         | Lab                                                                    |       |       |
| 680 | Netherlands      | 2008-2009  | The Longitudinal Aging Study Amsterdam (LASA)                                                                                        | Subnational                 | both                  | 60-100                                | 60-100 | 827                                  | 665    | Fasting glucose             | Yes                                         | Unknown                                                                | 17    |       |
| 681 | Netherlands      | 2012-2013  | The Longitudinal Aging Study Amsterdam (LASA)                                                                                        | Subnational                 | both                  | 55-65                                 | 55-65  | 454                                  | 433    | Fasting glucose             | Yes                                         | Unknown                                                                | 17    |       |
| 682 | New Zealand      | 2008-2009  | New Zealand Adult Nutrition Survey                                                                                                   | National                    | both                  | 18+                                   | 18+    | 2,284                                | 1,806  | HbA1c                       | Yes                                         | Lab                                                                    | Lab   |       |
| 683 | Nicaragua        | 2003-2004  | CAMDI                                                                                                                                | Community                   | urban                 | 20+                                   | 20+    | 919                                  | 781    | Fasting glucose             | Yes                                         | Lab                                                                    |       |       |
| 684 | Niger            | 2021       | STEPS                                                                                                                                | National                    | both                  | 18-69                                 | 18-69  | 3,076                                | 2,283  | Fasting glucose             | Yes                                         | Portable                                                               |       |       |
| 685 | Nigeria          | 1998       | Okesina et al., East Afr Med J 76:212-6, 1999                                                                                        | Community                   | rural                 | 21+                                   | 21+    | 120                                  | 222    | Fasting glucose             | No                                          | Unknown                                                                |       |       |
| 686 | Nigeria          | 1999-2009  | Prostate cancer dietary risk factors study                                                                                           | Subnational                 | both                  | 35+                                   | 35+    | 447                                  | 447    | Fasting glucose             | No                                          | Portable                                                               |       |       |
| 687 | Nigeria          | 2006       | Clustering of cardiovascular disease risk-factors in semiurban population in Northern Nigeria                                        | Community                   | urban                 | 18+                                   | 18+    | 106                                  | 87     | Fasting glucose             | No                                          | Lab                                                                    |       |       |
| 688 | Nigeria          | 2007       | Southeast Nigeria kidney disease study                                                                                               | Community                   | rural                 | 25-64                                 | 25-64  | 442                                  | 169    | Fasting glucose             | Yes                                         | Portable                                                               |       |       |
| 689 | Nigeria          | 2009-2011  | Anthropometric indices in Calabar                                                                                                    | Community                   | urban                 | 18-79                                 | 18-79  | 331                                  | 381    | Fasting glucose             | No                                          | Lab                                                                    |       |       |
| 690 | Norway           | 2001-2002  | The Tromsø Study: Tromsø 5, Tromsø Study Panel                                                                                       | Community                   | both                  | 30-89                                 | 30-89  | 3,576                                | 2,536  | HbA1c                       | Yes                                         | Lab                                                                    | Lab   |       |
| 691 | Norway           | 2007-2008  | The Tromsø Study: Tromsø 6                                                                                                           | Community                   | both                  | 30-87                                 | 30-87  | 6,709                                | 5,927  | HbA1c                       | Yes                                         | Lab                                                                    | Lab   |       |
| 692 | Norway           | 2017-2019  | HUNT4 study                                                                                                                          | Community                   | rural                 | 19+                                   | 19+    | 29,556                               | 24,585 | HbA1c                       | Yes                                         | Lab                                                                    | Lab   |       |
| 693 | Oman             | 1991       | The 1991 National Diabetes Survey of Oman                                                                                            | National                    | both                  | 20+                                   | 20+    | 2,809                                | 1,989  | Fasting glucose             | Yes                                         | Lab                                                                    |       |       |
| 694 | Oman             | 2000       | Oman National Health Survey                                                                                                          | National                    | both                  | 20+                                   | 20+    | 2,933                                | 2,905  | Fasting glucose             | No                                          | Lab                                                                    |       |       |
| 695 | Oman             | 2001       | Nizwa Healthy Lifestyle Project                                                                                                      | Community                   | urban                 | 20+                                   | 20+    | 692                                  | 600    | Fasting glucose             | Yes                                         | Lab                                                                    |       |       |
| 696 | Oman             | 2008       | Gulf Cooperation Council World Health Survey                                                                                         | National                    | both                  | 18+                                   | 18+    | 2,264                                | 2,446  | Fasting glucose             | Yes                                         | Unknown                                                                |       |       |
| 697 | Oman             | 2017       | STEPS                                                                                                                                | National                    | both                  | 18+                                   | 18+    | 2,997                                | 3,365  | Fasting glucose             | Yes                                         | Portable                                                               |       |       |
| 698 | Pakistan         | 1994       | Basit et al., J Pak Med Assoc 52:357-60, 2002                                                                                        | Subnational                 | rural                 | 25+                                   | 25+    | 1,362                                | 761    | Fasting glucose             | No                                          | Unknown                                                                |       |       |
| 699 | Pakistan         | 2002       | Basit et al., Diabetes Res Clin Pract 94:456-62, 2011; Study 1                                                                       | Subnational                 | rural                 | 25+                                   | 25+    | 1,362                                | 670    | Fasting glucose             | No                                          | Lab                                                                    |       |       |
| 700 | Pakistan         | 2005       | COBRA-1                                                                                                                              | Community                   | urban                 | 40+                                   | 40+    | 1,506                                | 1,376  | Fasting glucose             | No                                          | Unknown                                                                |       |       |
| 701 | Pakistan         | 2009-2010  | Basit et al., Diabetes Res Clin Pract 94:456-62, 2011; Study 2                                                                       | Subnational                 | rural                 | 25+                                   | 25+    | 840                                  | 272    | Fasting glucose             | No                                          | Lab                                                                    |       |       |
| 702 | Pakistan         | 2016-2017  | National Diabetes Survey of Pakistan                                                                                                 | National                    | both                  | 20+                                   | 20+    | 4,261                                | 3,273  | Fasting glucose, HbA1c      | No                                          | Lab                                                                    | Lab   | 18    |
| 703 | Palau            | 2011-2013  | STEPS                                                                                                                                | National                    | both                  | 25-64                                 | 25-64  | 1,124                                | 1,038  | Fasting glucose             | Yes                                         | Portable                                                               |       |       |
| 704 | Palau            | 2016       | STEPS                                                                                                                                | National                    | both                  | 18+                                   | 18+    | 854                                  | 872    | Fasting glucose             | Yes                                         | Portable                                                               |       |       |
| 705 | Panama           | 2010-2011  | Prevalencia de factores de riesgo asociados a enfermedad cardiovascular 2010-2011                                                    | Subnational                 | both                  | 18+                                   | 18+    | 2,472                                | 1,072  | Fasting glucose, HbA1c      | Yes                                         | Lab                                                                    | Lab   |       |
| 706 | Panama           | 2019       | Encuesta Nacional de Salud de Panama (ENSPA)                                                                                         | National                    | both                  | 18+                                   | 18+    | 12,013                               | 4,846  | Fasting glucose, HbA1c      | Yes                                         | Lab                                                                    | Lab   |       |
| 707 | Papua New Guinea | 1991       | Dowse et al., Med J Aust 160:767-74, 1994                                                                                            | Subnational                 | both                  | 25-88                                 | 25-88  | 1,009                                | 837    | Fasting glucose             | Yes                                         | Lab                                                                    |       |       |
| 708 | Peru             | 2004       | Factores de Riesgo de Enfermedades No Transmisibles                                                                                  | Community                   | urban                 | 18+                                   | 18+    | 430                                  | 209    | Fasting glucose             | Yes                                         | Lab                                                                    |       |       |
| 709 | Peru             | 2005       | PREVENCION Study; Medina-Lezama et al., J Am Soc Hypertens 1:216-25, 2007                                                            | Community                   | urban                 | 20-80                                 | 20-80  | 1,011                                | 867    | Fasting glucose             | No                                          | Unknown                                                                |       |       |
| 710 | Peru             | 2004-2005  | Cardiovascular Risk factors Multiple Evaluation in Latin America (CARMELA)                                                           | Community                   | urban                 | 25-64                                 | 25-64  | 883                                  | 769    | Fasting glucose             | Yes                                         | Lab                                                                    |       |       |

|     | Country                          | Data years | Survey/Study name/Citation                                                                                                                                                   | Level of representativeness | Rural, urban, or both | Age range as used for global analysis |       | Sample size used for global analysis |        | Glycaemic markers available | Information available on diabetes treatment | Whether measured in a laboratory or by a point-of-care portable device |         | Notes |
|-----|----------------------------------|------------|------------------------------------------------------------------------------------------------------------------------------------------------------------------------------|-----------------------------|-----------------------|---------------------------------------|-------|--------------------------------------|--------|-----------------------------|---------------------------------------------|------------------------------------------------------------------------|---------|-------|
|     |                                  |            |                                                                                                                                                                              |                             |                       | Female                                | Male  | Female                               | Male   |                             |                                             | Glucose                                                                | HbA1c   |       |
| 711 | Peru                             | 2004-2005  | Encuesta Nacional de Indicadores Nutricionales, Bioquímicos, Socioeconómicos y Culturales Relacionados con las Enfermedades Crónicas Degenerativas                           | National                    | both                  | 20+                                   | 20+   | 2,095                                | 2,095  | Fasting glucose             | Yes                                         | Lab                                                                    |         |       |
| 712 | Peru                             | 2005       | Factores de Riesgo de Enfermedades No Transmisibles                                                                                                                          | Community                   | urban                 | 18+                                   | 18+   | 532                                  | 199    | Fasting glucose             | Yes                                         | Lab                                                                    |         |       |
| 713 | Peru                             | 2006       | Factores de Riesgo de Enfermedades No Transmisibles                                                                                                                          | Community                   | urban                 | 18+                                   | 18+   | 1,030                                | 608    | Fasting glucose             | Yes                                         | Lab                                                                    |         |       |
| 714 | Peru                             | 2007-2008  | PERU MIGRANT Study                                                                                                                                                           | Community                   | both                  | 30+                                   | 30+   | 521                                  | 466    | Fasting glucose, HbA1c      | Yes                                         | Lab                                                                    | Lab     |       |
| 715 | Peru                             | 2009-2012  | CRONICAS Cohort Study                                                                                                                                                        | Subnational                 | both                  | 35+                                   | 35+   | 1,849                                | 1,737  | Fasting glucose, HbA1c      | Yes                                         | Lab                                                                    | Lab     |       |
| 716 | Peru                             | 2013       | Clinical functional and sociofamiliar profiles of the elderly from a community in a district of Lima, Peru                                                                   | Community                   | urban                 | 60+                                   | 60+   | 200                                  | 114    | Fasting glucose             | No                                          | Lab                                                                    |         |       |
| 717 | Peru                             | 2013-2014  | CRONICAS Cohort Study                                                                                                                                                        | Subnational                 | both                  | 36+                                   | 36+   | 1,387                                | 1,309  | Fasting glucose, HbA1c      | Yes                                         | Lab                                                                    | Lab     |       |
| 718 | Peru                             | 2015-2016  | PERU MIGRANT Study                                                                                                                                                           | Community                   | both                  | 38+                                   | 38+   | 344                                  | 344    | Fasting glucose             | Yes                                         | Lab                                                                    |         |       |
| 719 | Peru                             | 2016-2017  | Screening of T2DM                                                                                                                                                            | Community                   | urban                 | 30-70                                 | 30-70 | 804                                  | 792    | Fasting glucose, HbA1c      | Yes                                         | Lab                                                                    | Lab     |       |
| 720 | Peru                             | 2017-2018  | Vigilancia Alimentario Nutricional por Etapas de Vida (VIANEV) 2017-2018                                                                                                     | National                    | both                  | 18-59                                 | 18-59 | 618                                  | 463    | Fasting glucose             | Yes                                         | Portable                                                               |         |       |
| 721 | Philippines                      | 1998       | National Nutrition Survey; Tanchoco et al., Asia Pac J Clin Nutr 12:271-6, 2003                                                                                              | National                    | both                  | 20+                                   | 20+   | 927                                  | 1,030  | Fasting glucose             | No                                          | Unknown                                                                |         |       |
| 722 | Philippines                      | 2003       | 6th National Nutrition Survey                                                                                                                                                | National                    | both                  | 20+                                   | 20+   | 2,497                                | 2,255  | Fasting glucose             | Yes                                         | Lab                                                                    |         |       |
| 723 | Philippines                      | 2005       | Cebu Longitudinal Health and Nutrition Survey 2005 Child Follow-up                                                                                                           | Community                   | both                  | 20-22                                 | 20-22 | 764                                  | 927    | Fasting glucose             | No                                          | Unknown                                                                |         |       |
| 724 | Philippines                      | 2005       | Cebu Longitudinal Health and Nutrition Survey 2005 Mother Follow-up                                                                                                          | Community                   | both                  | 35-69                                 |       | 1,872                                |        | Fasting glucose             | No                                          | Unknown                                                                |         |       |
| 725 | Philippines                      | 2008       | 7th National Nutrition Survey                                                                                                                                                | National                    | both                  | 20+                                   | 20+   | 3,719                                | 3,318  | Fasting glucose             | Yes                                         | Lab                                                                    |         |       |
| 726 | Philippines                      | 2008       | Philippines LIFEGARE Cohort                                                                                                                                                  | National                    | both                  | 20-50                                 | 20-50 | 1,743                                | 1,329  | Fasting glucose             | No                                          | Lab                                                                    |         |       |
| 727 | Philippines                      | 2013-2014  | 8th National Nutrition Survey                                                                                                                                                | National                    | both                  | 18+                                   | 18+   | 10,427                               | 9,797  | Fasting glucose             | Yes                                         | Lab                                                                    |         |       |
| 728 | Philippines                      | 2018-2021  | Philippine Expanded National Nutrition Survey                                                                                                                                | National                    | both                  | 18+                                   | 18+   | 42,650                               | 34,265 | Fasting glucose             | No                                          | Lab                                                                    |         |       |
| 729 | Poland                           | 1989-1990  | Polish Program CINDI (CINDI Lodz 1989-1990)                                                                                                                                  | Community                   | urban                 | 25-64                                 | 25-64 | 945                                  | 812    | Fasting glucose             | Yes                                         | Lab                                                                    |         |       |
| 730 | Poland                           | 1993       | DECODE; DECODE Study Group, Diabetes Care 26:61-9, 2003                                                                                                                      | Community                   | urban                 | 40-79                                 | 40-79 | 192                                  | 172    | Fasting glucose             | No                                          | Unknown                                                                |         |       |
| 731 | Poland                           | 2000       | The health status, risk factors of chronic diseases and health behaviors of residents of Torun (CINDI Torun 2000)                                                            | Community                   | urban                 | 18-83                                 | 18-83 | 1,010                                | 929    | Fasting glucose             | Yes                                         | Lab                                                                    |         |       |
| 732 | Poland                           | 2001-2002  | The health status, risk factors of chronic diseases and health behaviors of residents of Lodz (CINDI Lodz 2001)                                                              | Community                   | urban                 | 18-64                                 | 18-64 | 841                                  | 1,003  | Fasting glucose             | Yes                                         | Lab                                                                    |         |       |
| 733 | Poland                           | 2002       | The health status, risk factors of chronic diseases and health behaviors of residents of Lodz - seniors (CINDI Lodz 2002)                                                    | Community                   | urban                 | 65+                                   | 65+   | 539                                  | 291    | Fasting glucose             | Yes                                         | Lab                                                                    |         |       |
| 734 | Poland                           | 2002       | NATPOL                                                                                                                                                                       | National                    | both                  | 18+                                   | 18+   | 1,294                                | 1,014  | Fasting glucose             | Yes                                         | Lab                                                                    |         |       |
| 735 | Poland                           | 2001-2002  | Young Men Cardiovascular Association Study                                                                                                                                   | Community                   | urban                 |                                       | 18+   |                                      | 944    | Fasting glucose             | Yes                                         | Lab                                                                    |         | 19    |
| 736 | Poland                           | 2003       | The European Male Ageing Study                                                                                                                                               | Community                   | both                  |                                       | 40+   |                                      | 394    | Fasting glucose             | Yes                                         | Lab                                                                    |         |       |
| 737 | Poland                           | 2002-2005  | Health, Alcohol and Psychosocial Factors In Eastern Europe                                                                                                                   | Community                   | urban                 | 45-70                                 | 45-70 | 5,484                                | 5,214  | Fasting glucose, HbA1c      | Yes                                         | Lab                                                                    | Lab     |       |
| 738 | Poland                           | 2003-2005  | National Multicenter Health Survey in Poland. Project WOBASZ                                                                                                                 | National                    | both                  | 20-74                                 | 20-74 | 6,960                                | 6,310  | Fasting glucose             | Yes                                         | Lab                                                                    |         |       |
| 739 | Poland                           | 2006       | The health, risk factors for chronic diseases, attitudes and behaviors of health residents of Torun (CINDI Torun 2006)                                                       | Community                   | urban                 | 18-65                                 | 18-65 | 1,115                                | 750    | Fasting glucose             | Yes                                         | Lab                                                                    |         |       |
| 740 | Poland                           | 2008       | The European Male Ageing Study                                                                                                                                               | Community                   | both                  |                                       | 45+   |                                      | 308    | Fasting glucose             | Yes                                         | Lab                                                                    |         |       |
| 741 | Poland                           | 2007-2011  | Medical, psychological and socioeconomic aspects of aging in Poland                                                                                                          | National                    | both                  | 55+                                   | 55+   | 2,671                                | 2,775  | Fasting glucose             | Yes                                         | Lab                                                                    |         |       |
| 742 | Poland                           | 2010       | Zatonska et al., Ann Agric Environ Med 18:265-9, 2011                                                                                                                        | Community                   | both                  | 45-64                                 | 45-64 | 2,570                                | 1,289  | Fasting glucose             | No                                          | Lab                                                                    |         |       |
| 743 | Poland                           | 2011       | NATPOL                                                                                                                                                                       | National                    | both                  | 18-79                                 | 18-79 | 1,210                                | 1,145  | Fasting glucose, HbA1c      | Yes                                         | Lab                                                                    | Lab     |       |
| 744 | Poland                           | 2011-2014  | Mogielica Human Ecology Study Site                                                                                                                                           | Community                   | rural                 | 45+                                   | 45+   | 405                                  | 142    | Fasting glucose             | Yes                                         | Lab                                                                    |         |       |
| 745 | Poland                           | 2013-2014  | National Multicenter Health Survey in Poland. Project WOBASZ II                                                                                                              | National                    | both                  | 20+                                   | 20+   | 3,360                                | 2,747  | Fasting glucose             | Yes                                         | Lab                                                                    |         |       |
| 746 | Poland                           | 2015-2016  | LIPIDOGRA2015 & LIPIDOGEN2015 Study - National epidemiological study of lipid disorders and selected risk factors of cardiovascular disease in primary health care in Poland | National                    | both                  | 18+                                   | 18+   | 8,690                                | 5,034  | Fasting glucose, HbA1c      | Yes                                         | Portable                                                               | Lab     |       |
| 747 | Portugal                         | 1999-2003  | EPIPorto study                                                                                                                                                               | Community                   | urban                 | 18+                                   | 18+   | 1,539                                | 946    | Fasting glucose             | Yes                                         | Lab                                                                    |         |       |
| 748 | Portugal                         | 2011-2013  | EPITeen - Epidemiological Health Investigation of Teenagers in Porto                                                                                                         | Community                   | urban                 | 20-23                                 | 20-23 | 868                                  | 810    | Fasting glucose, HbA1c      | No                                          | Lab                                                                    | Unknown |       |
| 749 | Portugal                         | 2015       | Inquérito Nacional de Saúde com Exame Físico (INSEF)                                                                                                                         | National                    | both                  | 25-74                                 | 25-74 | 2,615                                | 2,265  | HbA1c                       | Yes                                         |                                                                        | Lab     |       |
| 750 | Puerto Rico                      | 2006       | Pérez et al., Ethn Dis 18:434-41, 2008                                                                                                                                       | Community                   | urban                 | 25-84                                 | 25-84 | 532                                  | 274    | Fasting glucose             | No                                          | Unknown                                                                |         |       |
| 751 | Qatar                            | 2012       | STEPS                                                                                                                                                                        | National                    | both                  | 18-64                                 | 18-64 | 1,379                                | 1,053  | Fasting glucose             | Yes                                         | Portable                                                               |         |       |
| 752 | Romania                          | 1997       | Valorile medii si limitele normalitatii unor constante biologice                                                                                                             | National                    | both                  | 30-85                                 | 30-85 | 5,050                                | 3,964  | Fasting glucose             | No                                          | Unknown                                                                |         |       |
| 753 | Romania                          | 2011-2012  | SEPHAR II (Study for the Evaluation of Prevalence of Hypertension and Cardiovascular Risk in Romania - 2nd edition)                                                          | National                    | both                  | 18-80                                 | 18-80 | 1,038                                | 936    | Fasting glucose, HbA1c      | Yes                                         | Lab                                                                    | Lab     |       |
| 754 | Romania                          | 2012-2014  | PREDATORR                                                                                                                                                                    | National                    | both                  | 20-79                                 | 20-79 | 1,431                                | 1,285  | Fasting glucose, HbA1c      | Yes                                         | Lab                                                                    | Lab     |       |
| 755 | Romania                          | 2021       | SEPHAR IV (Study for the Evaluation of Prevalence of Hypertension and Cardiovascular Risk in Romania - 4th edition)                                                          | National                    | both                  | 18-80                                 | 18-80 | 884                                  | 588    | Fasting glucose, HbA1c      | Yes                                         | Lab                                                                    | Lab     |       |
| 756 | Russian Federation               | 2002-2005  | Health, Alcohol and Psychosocial Factors In Eastern Europe                                                                                                                   | Community                   | urban                 | 45-70                                 | 45-70 | 5,079                                | 4,244  | Fasting glucose, HbA1c      | Yes                                         | Lab                                                                    | Lab     |       |
| 757 | Russian Federation               | 2012-2014  | Epidemiology of Cardiovascular diseases in different regions of Russia (ESSE-RF)                                                                                             | National                    | both                  | 25-64                                 | 25-64 | 11,639                               | 6,979  | Fasting glucose             | Yes                                         | Lab                                                                    |         |       |
| 758 | Russian Federation               | 2015-2017  | Ural Eye and Medical Study (UEMS)                                                                                                                                            | Subnational                 | rural                 | 40+                                   | 40+   | 1,869                                | 1,524  | Fasting glucose             | Yes                                         | Lab                                                                    |         |       |
| 759 | Russian Federation               | 2015-2017  | Ural Eye and Medical Study (UEMS)                                                                                                                                            | Community                   | urban                 | 40+                                   | 40+   | 1,437                                | 1,035  | Fasting glucose             | Yes                                         | Lab                                                                    |         |       |
| 760 | Russian Federation               | 2017       | Epidemiology of Cardiovascular Diseases in Different Regions of Russia - 2 (ESSE-RF-2)                                                                                       | Subnational                 | both                  | 25-64                                 | 25-64 | 3,699                                | 2,980  | Fasting glucose             | Yes                                         | Lab                                                                    |         |       |
| 761 | Russian Federation               | 2017-2020  | Ural Very Old Study                                                                                                                                                          | Community                   | both                  | 85+                                   | 85+   | 635                                  | 231    | Fasting glucose             | Yes                                         | Lab                                                                    |         |       |
| 762 | Rwanda                           | 2012       | STEPS                                                                                                                                                                        | National                    | both                  | 18-64                                 | 18-64 | 4,066                                | 2,524  | Fasting glucose             | Yes                                         | Portable                                                               |         |       |
| 763 | Rwanda                           | 2021-2022  | STEPS                                                                                                                                                                        | National                    | both                  | 18-69                                 | 18-69 | 3,389                                | 2,130  | Fasting glucose             | Yes                                         | Portable                                                               |         |       |
| 764 | Saint Lucia                      | 2012       | STEPS                                                                                                                                                                        | National                    | both                  | 25-64                                 | 25-64 | 1,126                                | 693    | Fasting glucose             | Yes                                         | Portable                                                               |         |       |
| 765 | Saint Lucia                      | 2019-2020  | STEPS                                                                                                                                                                        | National                    | both                  | 18-69                                 | 18-69 | 1,651                                | 1,296  | Fasting glucose             | Yes                                         | Portable                                                               |         |       |
| 766 | Saint Vincent and the Grenadines | 2013-2014  | STEPS                                                                                                                                                                        | National                    | both                  | 18-69                                 | 18-69 | 1,923                                | 1,544  | Fasting glucose             | Yes                                         | Portable                                                               |         |       |
| 767 | Samoa                            | 1991       | Non-Communicable Disease Risk Factor (NCDRF)                                                                                                                                 | Subnational                 | rural                 | 25+                                   | 25+   | 495                                  | 466    | Fasting glucose             | Yes                                         | Lab                                                                    |         |       |
| 768 | Samoa                            | 1991       | Non-Communicable Disease Risk Factor (NCDRF)                                                                                                                                 | Subnational                 | urban                 | 25+                                   | 25+   | 443                                  | 328    | Fasting glucose             | Yes                                         | Lab                                                                    |         |       |

|     | Country               | Data years | Survey/Study name/Citation                                                                                                                | Level of representativeness | Rural, urban, or both | Age range as used for global analysis |       | Sample size used for global analysis |           | Glycaemic markers available | Information available on diabetes treatment | Whether measured in a laboratory or by a point-of-care portable device |          | Notes |
|-----|-----------------------|------------|-------------------------------------------------------------------------------------------------------------------------------------------|-----------------------------|-----------------------|---------------------------------------|-------|--------------------------------------|-----------|-----------------------------|---------------------------------------------|------------------------------------------------------------------------|----------|-------|
|     |                       |            |                                                                                                                                           |                             |                       | Female                                | Male  | Female                               | Male      |                             |                                             | Glucose                                                                | HbA1c    |       |
| 769 | Samoa                 | 1995       | McGarvey, Pac Health Dialog 8(1):157-62, 2001                                                                                             | National                    | both                  | 29+                                   | 29+   | 153                                  | 145       | Fasting glucose             | Yes                                         | Lab                                                                    |          |       |
| 770 | Samoa                 | 2002       | STEPS                                                                                                                                     | National                    | both                  | 25-64                                 | 25-64 | 1,339                                | 1,188     | Fasting glucose             | Yes                                         | Portable                                                               |          |       |
| 771 | Samoa                 | 2010       | Samoa Genome-Wide Association Study                                                                                                       | National                    | both                  | 24-65                                 | 24-65 | 2,056                                | 1,404     | Fasting glucose             | Yes                                         | Lab                                                                    | 20       |       |
| 772 | Sao Tome and Principe | 2019       | STEPS                                                                                                                                     | National                    | both                  | 18-69                                 | 18-69 | 1,367                                | 979       | Fasting glucose             | Yes                                         | Portable                                                               |          |       |
| 773 | Saudi Arabia          | 1998       | National Epidemiological Health Survey, Al-Nozha et al., Saudi Med J 25:1603-10, 2004                                                     | National                    | both                  | 30-70                                 | 30-70 | 8,804                                | 8,002     | Fasting glucose             | No                                          | Unknown                                                                |          |       |
| 774 | Saudi Arabia          | 2004-2005  | STEPS                                                                                                                                     | National                    | both                  | 15-64                                 | 18-64 | 2,231                                | 2,155     | Fasting glucose             | No                                          | Lab                                                                    | 3        |       |
| 775 | Saudi Arabia          | 2009       | RIYADH Cohort 2: Al-Daghri et al., BMC Med 9:76, 2011                                                                                     | Community                   | urban                 | 18-80                                 | 18-80 | 1,267                                | 1,409     | Fasting glucose             | No                                          | Lab                                                                    |          |       |
| 776 | Saudi Arabia          | 2011-2012  | Jeeluna Study- National Assessment of the Health Needs of Adolescents in Saudi Arabia                                                     | National                    | both                  | 18-19                                 | 18-19 | 256                                  | 430       | Fasting glucose             | No                                          | Lab                                                                    |          |       |
| 777 | Senegal               | 2010-2012  | Biocultural determinants of overweight and obesity in the context of nutrition transition in Senegal: a holistic anthropological approach | Subnational                 | both                  | 18+                                   | 18+   | 242                                  | 216       | Fasting glucose             | Yes                                         | Portable                                                               |          |       |
| 778 | Senegal               | 2015       | Les maladies chroniques au Sénégal: Une écologie de la santé comparative entre Dakar et Widou Thiengoly                                   | Community                   | both                  | 20+                                   | 20+   | 765                                  | 732       | Fasting glucose             | Yes                                         | Portable                                                               |          |       |
| 779 | Senegal               | 2015       | Enquête Nationale sur les Facteurs de Risque des Maladies Non Transmissibles (STEPS)                                                      | National                    | both                  | 18-70                                 | 18-70 | 3,336                                | 1,923     | Fasting glucose             | Yes                                         | Portable                                                               |          |       |
| 780 | Seychelles            | 1989       | Seychelles Heart Survey I                                                                                                                 | National                    | both                  | 25-64                                 | 25-64 | 568                                  | 513       | Fasting glucose             | Yes                                         | Portable                                                               |          |       |
| 781 | Seychelles            | 2004       | Seychelles Heart Survey III                                                                                                               | National                    | both                  | 25-64                                 | 25-64 | 687                                  | 568       | Fasting glucose             | Yes                                         | Portable                                                               |          |       |
| 782 | Seychelles            | 2013-2014  | Seychelles Heart Survey IV                                                                                                                | National                    | both                  | 25-64                                 | 25-64 | 699                                  | 531       | Fasting glucose, HbA1c      | Yes                                         | Portable                                                               | Lab      |       |
| 783 | Seychelles            | 2023       | Seychelles Heart Survey V                                                                                                                 | National                    | both                  | 18-74                                 | 18-74 | 654                                  | 531       | Fasting glucose, HbA1c      | Yes                                         | Lab                                                                    | Lab      |       |
| 784 | Singapore             | 1982-1985  | Thyroid Heart Study                                                                                                                       | National                    | both                  | 18+                                   | 18+   | 900                                  | 959       | Fasting glucose             | Yes                                         | Lab                                                                    |          |       |
| 785 | Singapore             | 1992       | National Health Survey                                                                                                                    | National                    | both                  | 18-64                                 | 18-64 | 1,703                                | 1,744     | Fasting glucose             | No                                          | Lab                                                                    |          |       |
| 786 | Singapore             | 1993-1995  | NUH Heart Study                                                                                                                           | National                    | both                  | 26+                                   | 26+   | 484                                  | 495       | Fasting glucose             | Yes                                         | Lab                                                                    |          |       |
| 787 | Singapore             | 1998       | National Health Survey                                                                                                                    | National                    | both                  | 18-69                                 | 18-69 | 2,262                                | 2,280     | Fasting glucose             | No                                          | Lab                                                                    |          |       |
| 788 | Singapore             | 2004       | National Health Survey                                                                                                                    | National                    | both                  | 18-74                                 | 18-74 | 1,842                                | 1,796     | Fasting glucose             | No                                          | Unknown                                                                |          |       |
| 789 | Singapore             | 2003-2005  | Singapore Longitudinal Ageing Study - Cohort 1; SLAS-1                                                                                    | Community                   | both                  | 55+                                   | 55+   | 1,766                                | 1,031     | Fasting glucose             | Yes                                         | Lab                                                                    |          |       |
| 790 | Singapore             | 2004-2007  | Singapore Cardiovascular Cohort Study and Singapore Prospective Study Program                                                             | National                    | both                  | 21+                                   | 21+   | 4,489                                | 3,868     | Fasting glucose, HbA1c      | Yes                                         | Lab                                                                    | Lab      |       |
| 791 | Singapore             | 2009-2011  | The Singapore Chinese Eye Study                                                                                                           | Community                   | both                  | 40-80                                 | 40-80 | 1,597                                | 1,590     | HbA1c                       | Yes                                         | Lab                                                                    | Lab      |       |
| 792 | Singapore             | 2008-2013  | Singapore Longitudinal Ageing Study - Cohort 2; SLAS-2                                                                                    | Community                   | both                  | 55+                                   | 55+   | 2,000                                | 1,216     | Fasting glucose             | Yes                                         | Lab                                                                    |          |       |
| 793 | Singapore             | 2012-2013  | Singapore Health Study                                                                                                                    | National                    | both                  | 18-79                                 | 18-79 | 1,192                                | 1,128     | Fasting glucose, HbA1c      | Yes                                         | Lab                                                                    | Lab      |       |
| 794 | Singapore             | 2014-2015  | Singapore Health 2                                                                                                                        | National                    | both                  | 18-79                                 | 18-79 | 1,476                                | 1,203     | Fasting glucose, HbA1c      | Yes                                         | Lab                                                                    | Lab      |       |
| 795 | Singapore             | 2015-2017  | The Singapore Chinese Eye Study                                                                                                           | Community                   | both                  | 50+                                   | 50+   | 1,193                                | 1,169     | HbA1c                       | Yes                                         | Lab                                                                    | Lab      |       |
| 796 | Slovakia              | 1993       | Countrywide Integrated Noncommunicable Diseases Intervention Programme                                                                    | National                    | both                  | 18-64                                 | 18-64 | 1,177                                | 719       | Fasting glucose             | No                                          | Lab                                                                    |          |       |
| 797 | Slovakia              | 1998       | Countrywide Integrated Noncommunicable Diseases Intervention Programme                                                                    | National                    | both                  | 18-64                                 | 18-64 | 1,045                                | 855       | Fasting glucose             | No                                          | Lab                                                                    |          |       |
| 798 | Slovakia              | 2003       | Countrywide Integrated Noncommunicable Diseases Intervention Programme                                                                    | National                    | both                  | 18-64                                 | 18-64 | 866                                  | 620       | Fasting glucose             | No                                          | Lab                                                                    |          |       |
| 799 | Slovakia              | 2008       | Countrywide Integrated Noncommunicable Diseases Intervention Programme                                                                    | National                    | both                  | 18-64                                 | 18-64 | 561                                  | 390       | Fasting glucose             | No                                          | Lab                                                                    |          |       |
| 800 | Slovakia              | 2011-2012  | European Health Examination Survey                                                                                                        | National                    | both                  | 18-64                                 | 18-64 | 1,091                                | 893       | Fasting glucose             | Yes                                         | Lab                                                                    |          |       |
| 801 | Solomon Islands       | 2004       | A genetic-ecological study of the risk factors for lifestyle-related diseases in Oceanian populations                                     | Community                   | rural                 | 18+                                   | 18+   | 107                                  | 106       | Fasting glucose             | Yes                                         | Lab                                                                    |          |       |
| 802 | Solomon Islands       | 2004       | A genetic-ecological study of the risk factors for lifestyle-related diseases in Oceanian populations                                     | Community                   | urban                 | 18+                                   | 18+   | 95                                   | 91        | Fasting glucose             | Yes                                         | Lab                                                                    |          |       |
| 803 | Solomon Islands       | 2006       | STEPS                                                                                                                                     | Subnational                 | both                  | 18-64                                 | 18-64 | 1,368                                | 1,159     | Fasting glucose             | Yes                                         | Portable                                                               |          |       |
| 804 | Solomon Islands       | 2009-2010  | Furusawa et al., N Z Med J 124(1333):17-28, 2011                                                                                          | Community                   | rural                 | 18+                                   | 18+   | 215                                  | 153       | HbA1c                       | Yes                                         |                                                                        | Portable |       |
| 805 | Solomon Islands       | 2009-2010  | Furusawa et al., N Z Med J 124(1333):17-28, 2011                                                                                          | Community                   | urban                 | 18-70                                 | 18-70 | 70                                   | 38        | HbA1c                       | Yes                                         |                                                                        | Portable |       |
| 806 | Solomon Islands       | 2015       | STEPS                                                                                                                                     | National                    | both                  | 18-69                                 | 18-69 | 1,318                                | 1,087     | Fasting glucose             | Yes                                         | Portable                                                               |          |       |
| 807 | Solomon Islands       | 2017-2018  | Impact of sea-level rise and relocation projects on health, ecology, and society in Oceania                                               | Community                   | both                  | 18+                                   | 18+   | 261                                  | 117       | HbA1c                       | Yes                                         |                                                                        | Portable |       |
| 808 | Somalia               | 2016       | The prevalence of selected risk factors for non-communicable diseases in Hargeisa, Somaliland: a cross-sectional study                    | Community                   | urban                 | 20-69                                 | 20-69 | 955                                  | 145       | Fasting glucose, HbA1c      | Yes                                         | Lab                                                                    | Lab      |       |
| 809 | South Africa          | 2008-2009  | Cape Town Bellville South Cohort Study - Baseline evaluation I                                                                            | Community                   | urban                 | 35-65                                 | 35-65 | 494                                  | 140       | Fasting glucose, HbA1c      | Yes                                         | Lab                                                                    | Lab      |       |
| 810 | South Africa          | 2011-2012  | South Africa National Health and Nutrition Examination Survey                                                                             | National                    | both                  | 18+                                   | 18+   | 8,081                                | 5,576     | HbA1c                       | Yes                                         |                                                                        | Lab      |       |
| 811 | South Africa          | 2018-2020  | Vukuzazi Study                                                                                                                            | Community                   | both                  | 18+                                   | 18+   | 10,976                               | 4,874     | HbA1c                       | Yes                                         |                                                                        | Lab      |       |
| 812 | South Korea           | 2001       | Kim et al., Br J Psychiatry 185:102-7, 2004                                                                                               | Community                   | both                  | 65+                                   | 65+   | 432                                  | 300       | Fasting glucose             | No                                          | Unknown                                                                |          |       |
| 813 | South Korea           | 2001       | Korea National Health and Nutrition Examination Survey                                                                                    | National                    | both                  | 18+                                   | 18+   | 3,366                                | 2,647     | Fasting glucose             | Yes                                         | Lab                                                                    |          |       |
| 814 | South Korea           | 2005       | Korea National Health and Nutrition Examination Survey                                                                                    | National                    | both                  | 18+                                   | 18+   | 3,101                                | 2,313     | Fasting glucose             | Yes                                         | Lab                                                                    |          |       |
| 815 | South Korea           | 2007       | Korea National Health and Nutrition Examination Survey                                                                                    | National                    | both                  | 18+                                   | 18+   | 1,734                                | 1,257     | Fasting glucose             | Yes                                         | Lab                                                                    |          |       |
| 816 | South Korea           | 2008       | Korea National Health and Nutrition Examination Survey                                                                                    | National                    | both                  | 18+                                   | 18+   | 3,967                                | 2,895     | Fasting glucose             | Yes                                         | Lab                                                                    |          |       |
| 817 | South Korea           | 2009       | Korea National Health and Nutrition Examination Survey                                                                                    | National                    | both                  | 18+                                   | 18+   | 4,264                                | 3,314     | Fasting glucose             | Yes                                         | Lab                                                                    |          |       |
| 818 | South Korea           | 2008-2009  | Korean National Health Insurance                                                                                                          | National                    | both                  | 40+                                   | 40+   | 6,087,857                            | 5,763,109 | Fasting glucose             | Yes                                         | Lab                                                                    |          |       |
| 819 | South Korea           | 2010       | Korea National Health and Nutrition Examination Survey                                                                                    | National                    | both                  | 18+                                   | 18+   | 3,543                                | 2,740     | Fasting glucose             | Yes                                         | Lab                                                                    |          |       |
| 820 | South Korea           | 2011       | Korea National Health and Nutrition Examination Survey                                                                                    | National                    | both                  | 18+                                   | 18+   | 3,479                                | 2,598     | Fasting glucose, HbA1c      | Yes                                         | Lab                                                                    | Lab      |       |
| 821 | South Korea           | 2010-2011  | Korean National Health Insurance                                                                                                          | National                    | both                  | 40+                                   | 40+   | 7,126,632                            | 6,670,305 | Fasting glucose             | Yes                                         | Lab                                                                    |          |       |
| 822 | South Korea           | 2012       | Korea National Health and Nutrition Examination Survey                                                                                    | National                    | both                  | 18+                                   | 18+   | 3,300                                | 2,344     | Fasting glucose, HbA1c      | Yes                                         | Lab                                                                    | Lab      |       |
| 823 | South Korea           | 2013       | Korea National Health and Nutrition Examination Survey                                                                                    | National                    | both                  | 18+                                   | 18+   | 3,115                                | 2,303     | Fasting glucose, HbA1c      | Yes                                         | Lab                                                                    | Lab      |       |
| 824 | South Korea           | 2012-2013  | Korean National Health Insurance                                                                                                          | National                    | both                  | 40+                                   | 40+   | 7,782,567                            | 7,256,160 | Fasting glucose             | Yes                                         | Lab                                                                    |          |       |
| 825 | South Korea           | 2014       | Korea National Health and Nutrition Examination Survey                                                                                    | National                    | both                  | 18+                                   | 18+   | 2,943                                | 2,115     | Fasting glucose, HbA1c      | Yes                                         | Lab                                                                    | Lab      |       |
| 826 | South Korea           | 2015       | Korea National Health and Nutrition Examination Survey                                                                                    | National                    | both                  | 18+                                   | 18+   | 2,963                                | 2,308     | Fasting glucose, HbA1c      | Yes                                         | Lab                                                                    | Lab      |       |
| 827 | South Korea           | 2014-2015  | Korean National Health Insurance                                                                                                          | National                    | both                  | 40+                                   | 40+   | 8,356,468                            | 7,869,529 | Fasting glucose             | Yes                                         | Lab                                                                    |          |       |
| 828 | South Korea           | 2016       | Korea National Health and Nutrition Examination Survey                                                                                    | National                    | both                  | 18+                                   | 18+   | 3,474                                | 2,682     | Fasting glucose, HbA1c      | Yes                                         | Lab                                                                    | Lab      |       |
| 829 | South Korea           | 2017       | Korea National Health and Nutrition Examination Survey                                                                                    | National                    | both                  | 18+                                   | 18+   | 3,438                                | 2,780     | Fasting glucose, HbA1c      | Yes                                         | Lab                                                                    | Lab      |       |
| 830 | South Korea           | 2017       | Korean National Health Insurance                                                                                                          | National                    | both                  | 40+                                   | 40+   | 9,074,778                            | 8,535,547 | Fasting glucose             | Yes                                         | Lab                                                                    |          |       |
| 831 | South Korea           | 2018       | Korea National Health and Nutrition Examination Survey                                                                                    | National                    | both                  | 18+                                   | 18+   | 3,522                                | 2,763     | Fasting glucose, HbA1c      | Yes                                         | Lab                                                                    | Lab      |       |
| 832 | South Korea           | 2019       | Korea National Health and Nutrition Examination Survey                                                                                    | National                    | both                  | 18+                                   | 18+   | 3,504                                | 2,835     | Fasting glucose, HbA1c      | Yes                                         | Lab                                                                    | Lab      |       |
| 833 | South Korea           | 2019       | Korean National Health Insurance                                                                                                          | National                    | both                  | 40+                                   | 40+   | 9,809,734                            | 9,238,805 | Fasting glucose             | Yes                                         | Lab                                                                    |          |       |

|     | Country            | Data years | Survey/Study name/Citation                                                                                | Level of representativeness | Rural, urban, or both | Age range as used for global analysis |       | Sample size used for global analysis |            | Glycaemic markers available | Information available on diabetes treatment | Whether measured in a laboratory or by a point-of-care portable device |          | Notes |
|-----|--------------------|------------|-----------------------------------------------------------------------------------------------------------|-----------------------------|-----------------------|---------------------------------------|-------|--------------------------------------|------------|-----------------------------|---------------------------------------------|------------------------------------------------------------------------|----------|-------|
|     |                    |            |                                                                                                           |                             |                       | Female                                | Male  | Female                               | Male       |                             |                                             | Glucose                                                                | HbA1c    |       |
| 834 | South Korea        | 2020       | Korea National Health and Nutrition Examination Survey                                                    | National                    | both                  | 18+                                   | 18+   | 3,283                                | 2,685      | Fasting glucose, HbA1c      | Yes                                         | Lab                                                                    | Lab      |       |
| 835 | South Korea        | 2021       | Korea National Health and Nutrition Examination Survey                                                    | National                    | both                  | 18+                                   | 18+   | 3,203                                | 2,510      | Fasting glucose, HbA1c      | Yes                                         | Lab                                                                    | Lab      |       |
| 836 | South Korea        | 2021       | Korean National Health Insurance                                                                          | National                    | both                  | 40+                                   | 40+   | 9,736,163                            | 9,234,806  | Fasting glucose             | Yes                                         | Lab                                                                    |          |       |
| 837 | South Korea        | 2023       | Korean National Health Insurance                                                                          | National                    | both                  | 40+                                   | 40+   | 10,590,978                           | 10,102,790 | Fasting glucose             | Yes                                         | Lab                                                                    |          | 2     |
| 838 | Spain              | 1989       | Cardiovascular Risk Factors Study in Catalonia                                                            | Subnational                 | both                  | 18+                                   | 18+   | 115                                  | 109        | Fasting glucose             | No                                          | Lab                                                                    |          |       |
| 839 | Spain              | 1994       | DECODE: DECODE Study Group. Diabetes Care 26:61-9, 2003                                                   | Community                   | urban                 | 30-89                                 | 30-89 | 2,699                                | 2,108      | Fasting glucose             | No                                          | Unknown                                                                |          |       |
| 840 | Spain              | 1996       | REGICOR Study; Masia et al., Rev Esp Cardiol 57:261-4, 2004                                               | Subnational                 | both                  | 25-74                                 | 25-74 | 874                                  | 874        | Fasting glucose             | No                                          | Unknown                                                                |          |       |
| 841 | Spain              | 1999       | The Asturias Study; Botas, et al., Diabet Med 20:904-8, 2003                                              | Subnational                 | both                  | 30-79                                 | 30-79 | 542                                  | 445        | Fasting glucose             | No                                          | Unknown                                                                |          |       |
| 842 | Spain              | 1999-2000  | Factores de riesgo en las islas Baleares: Estudio CORSAIB                                                 | Subnational                 | both                  | 35-74                                 | 35-74 | 865                                  | 804        | Fasting glucose             | Yes                                         | Lab                                                                    |          |       |
| 843 | Spain              | 2001-2002  | Catalan Health Interview Survey                                                                           | Subnational                 | both                  | 18-74                                 | 18-74 | 755                                  | 599        | Fasting glucose             | Yes                                         | Portable                                                               |          |       |
| 844 | Spain              | 2001-2003  | Diabetes, Nutrición y Obesidad en la población adulta de la Región de Murcia (DINO)                       | Subnational                 | both                  | 20+                                   | 20+   | 837                                  | 719        | Fasting glucose, HbA1c      | Yes                                         | Lab                                                                    | Lab      |       |
| 845 | Spain              | 2000-2005  | CDC of the Canary Islands                                                                                 | Subnational                 | both                  | 18-75                                 | 18-75 | 3,763                                | 2,908      | Fasting glucose             | Yes                                         | Lab                                                                    |          |       |
| 846 | Spain              | 2003       | The European Male Ageing Study                                                                            | Community                   | both                  |                                       | 40+   |                                      | 402        | Fasting glucose             | Yes                                         | Lab                                                                    |          |       |
| 847 | Spain              | 2004       | Vioque J et al., Obesity 16(3):664-70, 2008                                                               | Community                   | urban                 | 24+                                   | 24+   | 117                                  | 87         | Fasting glucose, HbA1c      | Yes                                         | Portable                                                               | Portable |       |
| 848 | Spain              | 2004       | Cardiovascular Risk Study in Castilla y León (RECCyL)                                                     | Subnational                 | both                  | 18+                                   | 18+   | 2,003                                | 1,816      | Fasting glucose             | Yes                                         | Lab                                                                    |          |       |
| 849 | Spain              | 2003-2005  | Registre Gironi del Cor (REGICOR)                                                                         | Subnational                 | both                  | 35-79                                 | 35-79 | 3,200                                | 2,883      | Fasting glucose             | Yes                                         | Lab                                                                    |          |       |
| 850 | Spain              | 2004-2006  | PREVICUS                                                                                                  | National                    | both                  | 60+                                   | 60+   | 3,905                                | 3,405      | Fasting glucose             | Yes                                         | Lab                                                                    |          |       |
| 851 | Spain              | 2006       | Lopez Suarez et al., Rev Esp Cardiol 61:1150-8, 2008                                                      | Community                   | urban                 | 50-75                                 | 50-75 | 460                                  | 398        | Fasting glucose             | No                                          | Unknown                                                                |          |       |
| 852 | Spain              | 2008       | The European Male Ageing Study                                                                            | Community                   | both                  |                                       | 45+   |                                      | 289        | Fasting glucose             | Yes                                         | Lab                                                                    |          |       |
| 853 | Spain              | 2007-2009  | Harmonizing Equation of Risk in Mediterranean countries Extremadura (HERMEX)                              | Subnational                 | both                  | 25-79                                 | 25-79 | 1,498                                | 1,298      | Fasting glucose, HbA1c      | Yes                                         | Lab                                                                    | Lab      |       |
| 854 | Spain              | 2008-2010  | Study on Nutrition and Cardiovascular Risk in Spain                                                       | National                    | both                  | 18+                                   | 18+   | 6,803                                | 6,123      | Fasting glucose, HbA1c      | Yes                                         | Lab                                                                    | Lab      |       |
| 855 | Spain              | 2009       | Cardiovascular Risk Study in Castilla y León (RECCyL)                                                     | Subnational                 | both                  | 20+                                   | 20+   | 1,579                                | 1,299      | Fasting glucose             | Yes                                         | Lab                                                                    |          |       |
| 856 | Spain              | 2014       | Cardiovascular Risk Study in Castilla y León (RECCyL)                                                     | Subnational                 | both                  | 20+                                   | 20+   | 1,495                                | 1,226      | Fasting glucose             | Yes                                         | Lab                                                                    |          |       |
| 857 | Spain              | 2015       | Study on Nutrition and Cardiovascular Risk in Spain (ENRICA)                                              | National                    | both                  | 65+                                   | 65+   | 952                                  | 871        | Fasting glucose             | Yes                                         | Lab                                                                    |          |       |
| 858 | Spain              | 2016-2017  | Estudio de Nutrición y Riesgo Cardiovascular en España (ENRICA)-Seniors cohort                            | Subnational                 | urban                 | 65-94                                 | 65-94 | 1,739                                | 1,532      | Fasting glucose, HbA1c      | Yes                                         | Lab                                                                    | Lab      |       |
| 859 | Spain              | 2019       | Estudio de Nutrición y Riesgo Cardiovascular en España (ENRICA)-Seniors cohort                            | Subnational                 | urban                 | 65-95                                 | 65-95 | 968                                  | 926        | Fasting glucose, HbA1c      | Yes                                         | Lab                                                                    | Lab      |       |
| 860 | Sri Lanka          | 2000       | Malavige et al., Diabetes Res Clin Pract 57:143-5, 2002                                                   | Community                   | urban                 | 30-64                                 | 30-64 | 621                                  | 421        | Fasting glucose             | No                                          | Unknown                                                                |          |       |
| 861 | Sri Lanka          | 2005-2006  | Sri Lanka Diabetes, Cardiovascular study (SLDCS)                                                          | National                    | both                  | 18+                                   | 18+   | 2,717                                | 1,777      | Fasting glucose             | Yes                                         | Lab                                                                    |          |       |
| 862 | Sri Lanka          | 2007       | Pinidiyapathirage et al., Diabet Med 30:326-32, 2013                                                      | Community                   | urban                 | 35-64                                 | 35-64 | 1,636                                | 1,349      | Fasting glucose, HbA1c      | No                                          | Lab                                                                    | Lab      |       |
| 863 | Sri Lanka          | 2010       | Pubudu De Silva et al., Int J Equity Health 11:76, 2012                                                   | Subnational                 | both                  | 35-64                                 | 35-64 | 606                                  | 628        | Fasting glucose             | No                                          | Lab                                                                    |          |       |
| 864 | Sri Lanka          | 2014       | STEPS                                                                                                     | National                    | both                  | 18-69                                 | 18-69 | 3,082                                | 2,017      | Fasting glucose             | Yes                                         | Portable                                                               |          |       |
| 865 | Sri Lanka          | 2018-2019  | The Sri Lanka Health and Ageing Study (SLHAS)                                                             | National                    | both                  | 18+                                   | 18+   | 3,239                                | 3,109      | Fasting glucose, HbA1c      | Yes                                         | Lab                                                                    | Lab      |       |
| 866 | Sri Lanka          | 2021       | STEPS                                                                                                     | National                    | both                  | 18-69                                 | 18-69 | 3,767                                | 2,447      | Fasting glucose             | Yes                                         | Portable                                                               |          |       |
| 867 | State of Palestine | 1996-1998  | Ramallah study                                                                                            | Community                   | rural                 | 18-64                                 | 18-64 | 443                                  | 206        | Fasting glucose             | Yes                                         | Portable                                                               |          |       |
| 868 | State of Palestine | 1996-1998  | Ramallah study                                                                                            | Community                   | urban                 | 18-64                                 | 18-64 | 458                                  | 182        | Fasting glucose             | Yes                                         | Portable                                                               |          |       |
| 869 | State of Palestine | 2010       | STEPS                                                                                                     | National                    | both                  | 18-64                                 | 18-64 | 3,834                                | 2,330      | Fasting glucose             | Yes                                         | Unknown                                                                |          |       |
| 870 | State of Palestine | 2022       | STEPS                                                                                                     | National                    | both                  | 18-69                                 | 18-69 | 3,661                                | 1,701      | Fasting glucose             | Yes                                         | Portable                                                               |          |       |
| 871 | Sudan              | 2005-2006  | STEPS                                                                                                     | Subnational                 | both                  | 25-64                                 | 25-64 | 321                                  | 145        | Fasting glucose             | No                                          | Unknown                                                                |          |       |
| 872 | Sudan              | 2016       | STEPS                                                                                                     | National                    | both                  | 18-69                                 | 18-69 | 4,594                                | 2,707      | Fasting glucose             | Yes                                         | Portable                                                               |          |       |
| 873 | Suriname           | 2013-2015  | The Healthy Life in Suriname Study (HELISUR)                                                              | Subnational                 | urban                 | 18-70                                 | 18-70 | 722                                  | 422        | Fasting glucose, HbA1c      | Yes                                         | Lab                                                                    | Lab      |       |
| 874 | Sweden             | 1980-1981  | Population Study of Women in Gothenburg                                                                   | Community                   | urban                 | 50-72                                 |       | 1,153                                |            | Fasting glucose             | Yes                                         | Lab                                                                    |          |       |
| 875 | Sweden             | 1980-1985  | Uppsala Longitudinal Study of Adult Men                                                                   | Community                   | both                  |                                       | 55-64 |                                      | 1,814      | Fasting glucose             | No                                          | Lab                                                                    |          | 23    |
| 876 | Sweden             | 1991       | Asplund-Carlson et al., J Intern Med 236:57-64, 1994                                                      | Subnational                 | both                  |                                       | 40-50 |                                      | 1,564      | Fasting glucose             | No                                          | Unknown                                                                |          |       |
| 877 | Sweden             | 1992-1993  | Population Study of Women in Gothenburg                                                                   | Community                   | urban                 | 62-84                                 |       | 834                                  |            | Fasting glucose             | Yes                                         | Lab                                                                    |          |       |
| 878 | Sweden             | 1991-1995  | Uppsala Longitudinal Study of Adult Men                                                                   | Community                   | both                  |                                       | 69-74 |                                      | 1,151      | Fasting glucose             | Yes                                         | Lab                                                                    |          | 23    |
| 879 | Sweden             | 1994       | DECODE: DECODE Study Group. Diabetes Care 26:61-9, 2003                                                   | Community                   | urban                 | 30-79                                 | 30-79 | 1,120                                | 1,058      | Fasting glucose             | No                                          | Unknown                                                                |          |       |
| 880 | Sweden             | 1994       | Nilson et al., Scand J Prim Health Care 18(2):111-112, 2000                                               | Community                   | urban                 | 56-65                                 | 56-65 | 217                                  | 170        | Fasting glucose             | No                                          | Lab                                                                    |          |       |
| 881 | Sweden             | 1995       | MONICA Gothenburg                                                                                         | Community                   | urban                 | 25-64                                 | 25-64 | 865                                  | 745        | Fasting glucose             | Yes                                         | Unknown                                                                |          |       |
| 882 | Sweden             | 1997       | SWESTONIA; Johansson et al., J Intern Med 252:551-60, 2002                                                | Community                   | urban                 | 35-55                                 | 35-55 | 135                                  | 137        | Fasting glucose             | No                                          | Unknown                                                                |          |       |
| 883 | Sweden             | 1997-2001  | Uppsala Longitudinal Study of Adult Men                                                                   | Community                   | both                  |                                       | 73-80 |                                      | 781        | Fasting glucose             | Yes                                         | Lab                                                                    |          | 23    |
| 884 | Sweden             | 2003       | The European Male Ageing Study                                                                            | Community                   | both                  |                                       | 40+   |                                      | 404        | Fasting glucose             | Yes                                         | Lab                                                                    |          |       |
| 885 | Sweden             | 2001-2004  | Swedish INTERGENE Cohort Study                                                                            | Subnational                 | both                  | 24-76                                 | 24-76 | 1,907                                | 1,694      | Fasting glucose             | Yes                                         | Lab                                                                    |          |       |
| 886 | Sweden             | 2001-2004  | PIVUS Study                                                                                               | Community                   | both                  | 70                                    | 70    | 1,527                                | 1,512      | Fasting glucose             | Yes                                         | Portable                                                               |          |       |
| 887 | Sweden             | 2004       | Wein et al., BMC Public Health 8:403, 2008                                                                | Community                   | urban                 | 50-61                                 | 50-61 | 667                                  | 1,250      | Fasting glucose             | No                                          | Unknown                                                                |          |       |
| 888 | Sweden             | 2002-2006  | Malmö Preventive Project Re-examination Study Cohort; Leosdottir et al., Cardiovasc Diabetol 10:118, 2011 | Community                   | both                  | 57-86                                 | 57-86 | 6,680                                | 11,546     | Fasting glucose             | No                                          | Lab                                                                    |          |       |
| 889 | Sweden             | 2003-2005  | Uppsala Longitudinal Study of Adult Men                                                                   | Community                   | both                  |                                       | 80-83 |                                      | 476        | Fasting glucose, HbA1c      | Yes                                         | Lab                                                                    | Lab      |       |
| 890 | Sweden             | 2004-2005  | European Youth Heart Study (EYHS) II                                                                      | Subnational                 | urban                 | 18-21                                 | 18-21 | 109                                  | 68         | Fasting glucose             | No                                          | Lab                                                                    |          |       |
| 891 | Sweden             | 2004-2005  | Population Study of Women in Gothenburg                                                                   | Community                   | urban                 | 38-50                                 |       | 500                                  |            | Fasting glucose             | Yes                                         | Lab                                                                    |          |       |
| 892 | Sweden             | 2008       | The European Male Ageing Study                                                                            | Community                   | both                  |                                       | 45+   |                                      | 382        | Fasting glucose             | Yes                                         | Lab                                                                    |          |       |
| 893 | Sweden             | 2007-2009  | PIVUS Study                                                                                               | Community                   | both                  | 75                                    | 75    | 1,440                                | 1,389      | Fasting glucose             | Yes                                         | Portable                                                               |          |       |
| 894 | Sweden             | 2008-2009  | Uppsala Longitudinal Study of Adult Men                                                                   | Community                   | both                  |                                       | 84-88 |                                      | 275        | Fasting glucose, HbA1c      | Yes                                         | Lab                                                                    | Unknown  |       |
| 895 | Sweden             | 2011-2014  | PIVUS Study                                                                                               | Community                   | both                  | 80                                    | 80    | 1,275                                | 1,161      | Fasting glucose             | Yes                                         | Portable                                                               |          |       |
| 896 | Sweden             | 2014-2016  | Swedish INTERGENE Cohort Study                                                                            | Subnational                 | urban                 | 37-88                                 | 37-88 | 659                                  | 606        | Fasting glucose             | Yes                                         | Lab                                                                    |          |       |
| 897 | Sweden             | 2016-2017  | Population Study of Women in Gothenburg                                                                   | Community                   | urban                 | 38-50                                 |       | 573                                  |            | Fasting glucose             | Yes                                         | Lab                                                                    |          |       |
| 898 | Switzerland        | 2005       | Bus Santé Study                                                                                           | Subnational                 | urban                 | 20-80                                 | 20-80 | 74                                   | 53         | Fasting glucose             | Yes                                         | Lab                                                                    |          |       |
| 899 | Switzerland        | 2003-2006  | Cohorte Lausannoise                                                                                       | Community                   | urban                 | 35-75                                 | 35-75 | 3,454                                | 3,104      | Fasting glucose             | Yes                                         | Lab                                                                    |          |       |

|     | Country              | Data years | Survey/Study name/Citation                                                           | Level of representativeness | Rural, urban, or both | Age range as used for global analysis |       | Sample size used for global analysis |        | Glycaemic markers available | Information available on diabetes treatment | Whether measured in a laboratory or by a point-of-care portable device |          | Notes |
|-----|----------------------|------------|--------------------------------------------------------------------------------------|-----------------------------|-----------------------|---------------------------------------|-------|--------------------------------------|--------|-----------------------------|---------------------------------------------|------------------------------------------------------------------------|----------|-------|
|     |                      |            |                                                                                      |                             |                       | Female                                | Male  | Female                               | Male   |                             |                                             | Glucose                                                                | HbA1c    |       |
| 900 | Switzerland          | 2006       | Bus Santé Study                                                                      | Subnational                 | urban                 | 20-80                                 | 20-80 | 53                                   | 67     | Fasting glucose             | Yes                                         | Lab                                                                    |          |       |
| 901 | Switzerland          | 2007       | Bus Santé Study                                                                      | Subnational                 | urban                 | 20-80                                 | 20-80 | 46                                   | 48     | Fasting glucose             | Yes                                         | Lab                                                                    |          |       |
| 902 | Switzerland          | 2008       | Bus Santé Study                                                                      | Subnational                 | urban                 | 20-80                                 | 20-80 | 209                                  | 215    | Fasting glucose             | Yes                                         | Lab                                                                    |          |       |
| 903 | Switzerland          | 2009       | Bus Santé Study                                                                      | Subnational                 | urban                 | 20-80                                 | 20-80 | 505                                  | 455    | Fasting glucose             | Yes                                         | Lab                                                                    |          |       |
| 904 | Switzerland          | 2010       | Bus Santé Study                                                                      | Subnational                 | urban                 | 20-80                                 | 20-80 | 483                                  | 467    | Fasting glucose             | Yes                                         | Lab                                                                    |          |       |
| 905 | Switzerland          | 2011       | Bus Santé Study                                                                      | Subnational                 | urban                 | 20-80                                 | 20-80 | 457                                  | 434    | Fasting glucose             | Yes                                         | Lab                                                                    |          |       |
| 906 | Switzerland          | 2009-2012  | Cohorte Lausannoise                                                                  | Community                   | urban                 | 40-75                                 | 40-75 | 29                                   | 2,337  | Fasting glucose             | Yes                                         | Lab                                                                    |          |       |
| 907 | Switzerland          | 2012       | Bus Santé Study                                                                      | Subnational                 | urban                 | 20-80                                 | 20-80 | 451                                  | 473    | Fasting glucose             | Yes                                         | Lab                                                                    |          |       |
| 908 | Switzerland          | 2013       | Bus Santé Study                                                                      | Subnational                 | urban                 | 20-80                                 | 20-80 | 514                                  | 461    | Fasting glucose             | Yes                                         | Lab                                                                    |          |       |
| 909 | Switzerland          | 2014       | Bus Santé Study                                                                      | Subnational                 | urban                 | 20-80                                 | 20-80 | 512                                  | 464    | Fasting glucose             | Yes                                         | Lab                                                                    |          |       |
| 910 | Switzerland          | 2015       | Bus Santé Study                                                                      | Subnational                 | urban                 | 20-80                                 | 20-80 | 499                                  | 501    | Fasting glucose             | Yes                                         | Lab                                                                    |          |       |
| 911 | Switzerland          | 2016       | Bus Santé Study                                                                      | Subnational                 | urban                 | 20-80                                 | 20-80 | 496                                  | 460    | Fasting glucose             | Yes                                         | Lab                                                                    |          |       |
| 912 | Switzerland          | 2014-2017  | Cohorte Lausannoise                                                                  | Community                   | urban                 | 45-87                                 | 45-87 | 2,398                                | 1,938  | Fasting glucose, HbA1c      | Yes                                         | Lab                                                                    | Lab      |       |
| 913 | Switzerland          | 2017       | Bus Santé Study                                                                      | Subnational                 | urban                 | 20-80                                 | 20-80 | 577                                  | 543    | Fasting glucose             | Yes                                         | Lab                                                                    |          |       |
| 914 | Switzerland          | 2018       | Bus Santé Study                                                                      | Subnational                 | urban                 | 20-80                                 | 20-80 | 545                                  | 513    | Fasting glucose             | Yes                                         | Lab                                                                    |          |       |
| 915 | Switzerland          | 2019       | Bus Santé Study                                                                      | Subnational                 | urban                 | 20-80                                 | 20-80 | 418                                  | 350    | Fasting glucose             | Yes                                         | Lab                                                                    |          |       |
| 916 | Switzerland          | 2018-2021  | Cohorte Lausannoise                                                                  | Community                   | urban                 | 49-90                                 | 49-90 | 1,866                                | 1,510  | Fasting glucose, HbA1c      | Yes                                         | Lab                                                                    | Lab      |       |
| 917 | Syrian Arab Republic | 2002       | National Survey on non-communicable diseases and factors affecting their development | National                    | both                  | 15-65                                 | 15-65 | 2,958                                | 1,784  | Fasting glucose             | No                                          | Unknown                                                                |          | 3     |
| 918 | Taiwan               | 1993-1996  | Nutrition and Health Survey in Taiwan                                                | National                    | both                  | 18+                                   | 18+   | 2,608                                | 2,598  | Fasting glucose             | Yes                                         | Lab                                                                    |          |       |
| 919 | Taiwan               | 1996       | Chen et al., Diabetes Res Clin Pract 44:59-69, 1999                                  | Community                   | both                  | 40-79                                 | 40-79 | 822                                  | 779    | Fasting glucose             | No                                          | Unknown                                                                |          |       |
| 920 | Taiwan               | 1997       | Chen et al., Diabetes Res Clin Pract 51:59-66, 2001                                  | Community                   | both                  | 50-79                                 | 50-79 | 1,053                                | 540    | Fasting glucose             | No                                          | Unknown                                                                |          |       |
| 921 | Taiwan               | 1998       | Lai et al., J Gerontol A Biol Sci Med Sci 55:M257-9, 2000                            | Community                   | both                  | 65-80                                 | 65-80 | 198                                  | 387    | Fasting glucose             | No                                          | Unknown                                                                |          |       |
| 922 | Taiwan               | 1999-2000  | Nutrition and Health Survey in Taiwan                                                | National                    | both                  | 65+                                   | 65+   | 754                                  | 796    | Fasting glucose             | Yes                                         | Lab                                                                    |          |       |
| 923 | Taiwan               | 2000       | Social Environment and Biomarkers of Aging Study                                     | National                    | both                  | 50+                                   | 50+   | 432                                  | 590    | Fasting glucose, HbA1c      | Yes                                         | Lab                                                                    | Lab      |       |
| 924 | Taiwan               | 2002       | Taiwanese Survey on Hypertension, Hyperglycemia and Hyperlipidemia                   | National                    | both                  | 18+                                   | 18+   | 3,215                                | 2,944  | Fasting glucose, HbA1c      | No                                          | Lab                                                                    | Lab      |       |
| 925 | Taiwan               | 2005       | TCHS; Lin et al., Eur J Clin Invest 37:783-90, 2007                                  | Community                   | urban                 | 40+                                   | 40+   | 1,212                                | 1,147  | Fasting glucose             | No                                          | Unknown                                                                |          |       |
| 926 | Taiwan               | 2006       | Social Environment and Biomarkers of Aging Study                                     | National                    | both                  | 53+                                   | 53+   | 604                                  | 679    | Fasting glucose, HbA1c      | Yes                                         | Lab                                                                    | Lab      |       |
| 927 | Taiwan               | 2005-2008  | Nutrition and Health Survey in Taiwan                                                | National                    | both                  | 19+                                   | 19+   | 1,363                                | 1,327  | Fasting glucose             | Yes                                         | Lab                                                                    |          |       |
| 928 | Taiwan               | 2007       | Taiwanese Survey on Hypertension, Hyperglycemia and Hyperlipidemia                   | National                    | both                  | 20+                                   | 20+   | 2,508                                | 2,174  | Fasting glucose, HbA1c      | Yes                                         | Lab                                                                    | Lab      |       |
| 929 | Taiwan               | 2013-2016  | Nutrition and Health Survey in Taiwan                                                | National                    | both                  | 18+                                   | 18+   | 2,861                                | 2,863  | Fasting glucose, HbA1c      | Yes                                         | Lab                                                                    | Lab      |       |
| 930 | Taiwan               | 2017-2020  | Nutrition and Health Survey in Taiwan                                                | National                    | both                  | 18+                                   | 18+   | 3,399                                | 3,379  | Fasting glucose, HbA1c      | Yes                                         | Lab                                                                    | Lab      |       |
| 931 | Tajikistan           | 2016       | STEPS                                                                                | National                    | both                  | 18-69                                 | 18-69 | 1,567                                | 1,098  | Fasting glucose             | Yes                                         | Portable                                                               |          |       |
| 932 | Tanzania             | 1987       | Swai et al., BMJ 305:1057-62, 1992                                                   | Community                   | rural                 | 15+                                   | 18+   | 4,283                                | 3,301  | Fasting glucose             | No                                          | Lab                                                                    |          | 3     |
| 933 | Tanzania             | 1997       | Aspray et al., Trans R Soc Trop Med Hyg 94:637-44, 2000                              | Community                   | rural                 | 18-64                                 | 18-64 | 527                                  | 401    | Fasting glucose             | No                                          | Unknown                                                                |          |       |
| 934 | Tanzania             | 1997       | Aspray et al., Trans R Soc Trop Med Hyg 94:637-44, 2000                              | Community                   | urban                 | 18-64                                 | 18-64 | 438                                  | 332    | Fasting glucose             | No                                          | Unknown                                                                |          |       |
| 935 | Tanzania             | 2011       | STEPS                                                                                | Subnational                 | both                  | 25-64                                 | 25-64 | 1,524                                | 1,011  | Fasting glucose             | Yes                                         | Portable                                                               |          |       |
| 936 | Tanzania             | 2012       | STEPS                                                                                | National                    | both                  | 25-64                                 | 25-64 | 2,849                                | 2,601  | Fasting glucose             | Yes                                         | Portable                                                               |          |       |
| 937 | Tanzania             | 2023       | STEPS                                                                                | National                    | both                  | 18-69                                 | 18-69 | 1,945                                | 1,459  | Fasting glucose             | Yes                                         | Portable                                                               |          | 2     |
| 938 | Thailand             | 1983       | Vannasaeng et al., J Med Assoc Thai 70 Suppl 2:126-30, 1987                          | Subnational                 | urban                 | 20-79                                 | 20-79 | 681                                  | 442    | Fasting glucose             | No                                          | Unknown                                                                |          |       |
| 939 | Thailand             | 1991       | Thailand National Health Examination Survey I                                        | National                    | both                  | 18+                                   | 18+   | 7,255                                | 5,363  | Fasting glucose             | Yes                                         | Lab                                                                    |          |       |
| 940 | Thailand             | 1997       | Thailand National Health Examination Survey II                                       | National                    | both                  | 18-59                                 | 18-59 | 1,682                                | 1,022  | Fasting glucose             | No                                          | Lab                                                                    |          |       |
| 941 | Thailand             | 2000       | InterASIA                                                                            | National                    | both                  | 35+                                   | 35+   | 3,212                                | 2,093  | Fasting glucose             | Yes                                         | Lab                                                                    |          |       |
| 942 | Thailand             | 2004       | Thailand National Health Examination Survey III                                      | National                    | both                  | 18+                                   | 18+   | 19,942                               | 18,500 | Fasting glucose             | Yes                                         | Lab                                                                    |          |       |
| 943 | Thailand             | 2009       | Thailand National Health Examination Survey IV                                       | National                    | both                  | 18+                                   | 18+   | 10,225                               | 9,271  | Fasting glucose             | Yes                                         | Lab                                                                    |          |       |
| 944 | Thailand             | 2014       | Thailand National Health Examination Survey V                                        | National                    | both                  | 18+                                   | 18+   | 10,566                               | 7,714  | Fasting glucose             | Yes                                         | Lab                                                                    |          |       |
| 945 | Thailand             | 2019-2020  | Thailand National Health Examination Survey VI                                       | National                    | both                  | 18+                                   | 18+   | 12,463                               | 8,976  | Fasting glucose, HbA1c      | Yes                                         | Lab                                                                    | Lab      |       |
| 946 | Timor-Leste          | 2009-2010  | Timor-Leste Eye Health Survey                                                        | Subnational                 | both                  | 40+                                   | 40+   | 248                                  | 246    | HbA1c                       | Yes                                         |                                                                        | Lab      |       |
| 947 | Timor-Leste          | 2014       | STEPS                                                                                | National                    | both                  | 18-69                                 | 18-69 | 1,465                                | 1,080  | Fasting glucose             | Yes                                         | Portable                                                               |          |       |
| 948 | Togo                 | 2010       | STEPS                                                                                | National                    | both                  | 18-64                                 | 18-64 | 1,967                                | 1,897  | Fasting glucose             | Yes                                         | Portable                                                               |          |       |
| 949 | Togo                 | 2021-2022  | STEPS                                                                                | National                    | both                  | 18-69                                 | 18-69 | 2,172                                | 1,586  | Fasting glucose             | Yes                                         | Portable                                                               |          |       |
| 950 | Tokelau              | 2005       | STEPS                                                                                | National                    | both                  | 18-64                                 | 18-64 | 267                                  | 241    | Fasting glucose             | Yes                                         | Portable                                                               |          |       |
| 951 | Tokelau              | 2014       | STEPS                                                                                | National                    | both                  | 18-64                                 | 18-64 | 282                                  | 262    | Fasting glucose             | Yes                                         | Portable                                                               |          |       |
| 952 | Tonga                | 2004       | STEPS                                                                                | National                    | both                  | 18-64                                 | 18-64 | 301                                  | 237    | Fasting glucose             | No                                          | Portable                                                               |          |       |
| 953 | Tonga                | 2011       | STEPS                                                                                | National                    | both                  | 18-64                                 | 18-64 | 1,464                                | 928    | Fasting glucose             | Yes                                         | Portable                                                               |          |       |
| 954 | Trinidad and Tobago  | 2011       | STEPS                                                                                | National                    | both                  | 18-64                                 | 18-64 | 1,538                                | 1,050  | Fasting glucose             | Yes                                         | Portable                                                               |          |       |
| 955 | Tunisia              | 1981       | Papoz et al., Int J Epidemiol 17:419-22, 1988                                        | Community                   | rural                 | 20+                                   | 20+   | 893                                  | 618    | Fasting glucose             | No                                          | Unknown                                                                |          |       |
| 956 | Tunisia              | 1990       | Gharbi et al., Rev Epidemiol Sante Publique 50:349-55, 2002                          | Community                   | both                  | 35-50                                 | 35-50 | 345                                  | 345    | Fasting glucose             | No                                          | Unknown                                                                |          |       |
| 957 | Tunisia              | 1996-1997  | Ariana Healthy Project 1997                                                          | Community                   | both                  | 35-65                                 | 35-65 | 2,724                                | 2,650  | Fasting glucose             | Yes                                         | Lab                                                                    |          |       |
| 958 | Tunisia              | 1996-1997  | Tunisian National Nutrition Survey 1996-1997                                         | National                    | both                  | 18+                                   | 18+   | 2,674                                | 1,397  | Fasting glucose             | Yes                                         | Lab                                                                    |          |       |
| 959 | Tunisia              | 2001       | Romdhane et al., Tunis Med 83 Suppl 5:41-6, 2005                                     | Community                   | both                  | 40-69                                 | 40-69 | 1,092                                | 744    | Fasting glucose             | No                                          | Unknown                                                                |          |       |
| 960 | Tunisia              | 2005       | Tunisian National Survey 2005 (TAHINA)                                               | National                    | both                  | 35-71                                 | 35-71 | 4,436                                | 3,314  | Fasting glucose             | Yes                                         | Lab                                                                    |          |       |
| 961 | Tunisia              | 2009-2010  | ObeMaghreb                                                                           | Subnational                 | urban                 | 18-49                                 | 18-49 | 696                                  | 998    | Fasting glucose             | Yes                                         | Lab                                                                    |          |       |
| 962 | Tunisia              | 2016       | Tunisian Health Examination Survey                                                   | Community                   | both                  | 18+                                   | 18+   | 4,702                                | 4,196  | HbA1c                       | Yes                                         |                                                                        | Portable |       |
| 963 | Türkiye              | 1990       | Turkish Adult Risk Factor Study                                                      | National                    | both                  | 20+                                   | 20+   | 1,130                                | 1,028  | Fasting glucose             | No                                          | Lab                                                                    |          |       |
| 964 | Türkiye              | 1995       | Turkish Adult Risk Factor Study                                                      | National                    | both                  | 25+                                   | 25+   | 606                                  | 584    | Fasting glucose             | No                                          | Lab                                                                    |          |       |

|      | Country              | Data years | Survey/Study name/Citation                                                                                 | Level of representativeness | Rural, urban, or both | Age range as used for global analysis |       | Sample size used for global analysis |       | Glycaemic markers available | Information available on diabetes treatment | Whether measured in a laboratory or by a point-of-care portable device |         | Notes |
|------|----------------------|------------|------------------------------------------------------------------------------------------------------------|-----------------------------|-----------------------|---------------------------------------|-------|--------------------------------------|-------|-----------------------------|---------------------------------------------|------------------------------------------------------------------------|---------|-------|
|      |                      |            |                                                                                                            |                             |                       | Female                                | Male  | Female                               | Male  |                             |                                             | Glucose                                                                | HbA1c   |       |
| 965  | Türkiye              | 1998       | Turkish Adult Risk Factor Study                                                                            | National                    | both                  | 28+                                   | 28+   | 781                                  | 718   | Fasting glucose             | Yes                                         | Lab                                                                    |         |       |
| 966  | Türkiye              | 2000       | Turkish Adult Risk Factor Study                                                                            | National                    | both                  | 30+                                   | 30+   | 952                                  | 904   | Fasting glucose             | Yes                                         | Lab                                                                    |         |       |
| 967  | Türkiye              | 2001       | Yumuk et al., Diabetes Res Clin Pract 70:151-8, 2005                                                       | Community                   | urban                 | 20+                                   | 20+   | 1,789                                | 688   | Fasting glucose             | No                                          | Unknown                                                                |         |       |
| 968  | Türkiye              | 2001       | Sekuri et al., Jpn Heart J 45:119-31, 2004                                                                 | Community                   | rural                 | 45+                                   |       | 205                                  |       | Fasting glucose             | No                                          | Unknown                                                                |         |       |
| 969  | Türkiye              | 2000-2002  | The Healthy Nutrition for Healthy Heart Study                                                              | National                    | both                  | 30+                                   | 30+   | 10,657                               | 4,778 | Fasting glucose             | No                                          | Lab                                                                    |         |       |
| 970  | Türkiye              | 2002       | Gokcel et al., Diabetes Care 26:3031-4, 2003                                                               | Subnational                 | both                  | 20-79                                 | 20-79 | 1,030                                | 607   | Fasting glucose             | No                                          | Unknown                                                                |         |       |
| 971  | Türkiye              | 2002       | Soysal et al., Anadolu Kardiyol Derg 5:196-201, 2005                                                       | Subnational                 | urban                 | 25-39                                 | 25-39 | 469                                  | 289   | Fasting glucose             | No                                          | Unknown                                                                |         |       |
| 972  | Türkiye              | 2001-2002  | Turkish Adult Risk Factor Study                                                                            | National                    | both                  | 32+                                   | 32+   | 1,247                                | 1,137 | Fasting glucose             | Yes                                         | Lab                                                                    |         |       |
| 973  | Türkiye              | 2003-2005  | Prevalence of prehypertension and associated risk factors among Turkish adults: Trabzon Hypertension Study | Subnational                 | both                  | 20+                                   | 20+   | 2,601                                | 2,208 | Fasting glucose             | No                                          | Lab                                                                    |         |       |
| 974  | Türkiye              | 2005-2006  | Turkish Adult Risk Factor Study                                                                            | National                    | both                  | 35+                                   | 35+   | 1,473                                | 1,401 | Fasting glucose             | Yes                                         | Lab                                                                    |         |       |
| 975  | Türkiye              | 2007-2009  | Balcova Heart Study                                                                                        | Community                   | urban                 | 30+                                   | 30+   | 8,441                                | 4,187 | Fasting glucose             | Yes                                         | Lab                                                                    |         |       |
| 976  | Türkiye              | 2007-2008  | Turkish Adult Risk Factor Study                                                                            | National                    | both                  | 37+                                   | 37+   | 1,473                                | 1,401 | Fasting glucose             | Yes                                         | Lab                                                                    |         |       |
| 977  | Türkiye              | 2009-2010  | Turkish Adult Risk Factor Study                                                                            | National                    | both                  | 39+                                   | 39+   | 1,474                                | 1,403 | Fasting glucose             | Yes                                         | Lab                                                                    |         |       |
| 978  | Türkiye              | 2010       | TURDEP-II; Satman et al., Eur J Epidemiol 28:169-80, 2013                                                  | National                    | urban                 | 20+                                   | 20+   | 9,943                                | 5,840 | Fasting glucose             | No                                          | Lab                                                                    |         |       |
| 979  | Türkiye              | 2010       | TURDEP-II; Satman et al., Eur J Epidemiol 28:169-80, 2013                                                  | National                    | rural                 | 20+                                   | 20+   | 6,578                                | 3,863 | Fasting glucose             | No                                          | Lab                                                                    |         |       |
| 980  | Türkiye              | 2009-2012  | Prevalence of diabetes and associated risk factors among adult population in Trabzon city                  | Subnational                 | both                  | 20+                                   | 20+   | 2,125                                | 1,574 | Fasting glucose             | No                                          | Lab                                                                    |         |       |
| 981  | Türkiye              | 2012-2013  | Turkish Adult Risk Factor Study                                                                            | National                    | both                  | 37+                                   | 37+   | 1,115                                | 1,028 | Fasting glucose, HbA1c      | Yes                                         | Lab                                                                    | Lab     |       |
| 982  | Türkiye              | 2014-2015  | Turkish Adult Risk Factor Study                                                                            | National                    | both                  | 44+                                   | 44+   | 756                                  | 712   | Fasting glucose             | No                                          | Lab                                                                    |         |       |
| 983  | Türkiye              | 2017       | STEPS                                                                                                      | National                    | both                  | 18+                                   | 18+   | 3,493                                | 2,369 | Fasting glucose             | Yes                                         | Portable                                                               |         |       |
| 984  | Turkmenistan         | 2013       | STEPS                                                                                                      | National                    | both                  | 18-64                                 | 18-64 | 2,874                                | 2,033 | Fasting glucose             | Yes                                         | Portable                                                               |         |       |
| 985  | Turkmenistan         | 2018       | STEPS                                                                                                      | National                    | both                  | 18-69                                 | 18-69 | 2,244                                | 1,716 | Fasting glucose             | Yes                                         | Portable                                                               |         |       |
| 986  | Tuvalu               | 2015       | STEPS                                                                                                      | National                    | both                  | 18-69                                 | 18-69 | 616                                  | 525   | Fasting glucose             | Yes                                         | Portable                                                               |         |       |
| 987  | Uganda               | 2014       | STEPS                                                                                                      | National                    | both                  | 18-69                                 | 18-69 | 2,132                                | 1,570 | Fasting glucose             | Yes                                         | Portable                                                               |         |       |
| 988  | Uganda               | 2023       | STEPS                                                                                                      | National                    | both                  | 18-69                                 | 18-69 | 2,069                                | 1,426 | Fasting glucose             | Yes                                         | Portable                                                               | 2       |       |
| 989  | Ukraine              | 2019       | STEPS                                                                                                      | National                    | both                  | 18-69                                 | 18-69 | 2,662                                | 1,610 | Fasting glucose             | Yes                                         | Portable                                                               |         |       |
| 990  | United Arab Emirates | 1999-2000  | Emirates National Diabetes and Coronary Artery Disease Risk Factor Study                                   | National                    | both                  | 20-80                                 | 20-80 | 3,773                                | 2,839 | Fasting glucose             | No                                          | Lab                                                                    |         |       |
| 991  | United Arab Emirates | 2017-2018  | STEPS                                                                                                      | National                    | both                  | 18+                                   | 18+   | 2,356                                | 2,172 | Fasting glucose             | Yes                                         | Portable                                                               |         |       |
| 992  | United Kingdom       | 1984-1986  | Scottish Heart Health Survey                                                                               | Subnational                 | both                  | 40-59                                 | 40-59 | 4,447                                | 4,381 | Fasting glucose             | Yes                                         | Lab                                                                    |         |       |
| 993  | United Kingdom       | 1987-1988  | Edinburgh Artery Study                                                                                     | Community                   | urban                 | 54-75                                 | 54-75 | 769                                  | 797   | Fasting glucose             | No                                          | Lab                                                                    |         |       |
| 994  | United Kingdom       | 1993       | DECODE; DECODE Study Group, Diabetes Care 26:61-9, 2003                                                    | Community                   | urban                 | 30-79                                 | 30-79 | 384                                  | 415   | Fasting glucose             | No                                          | Unknown                                                                |         |       |
| 995  | United Kingdom       | 1993       | Whickham Survey; Vanderpump et al., Diabet Med 13:741-7, 1996                                              | Community                   | urban                 | 35+                                   | 35+   | 938                                  | 761   | Fasting glucose             | No                                          | Unknown                                                                |         |       |
| 996  | United Kingdom       | 1998-2000  | The British Regional Heart Study                                                                           | National                    | urban                 |                                       | 60-79 |                                      | 4,105 | Fasting glucose             | Yes                                         | Lab                                                                    |         |       |
| 997  | United Kingdom       | 1999-2001  | British Women's Heart and Health Study                                                                     | National                    | both                  | 60-79                                 |       | 3,909                                |       | Fasting glucose             | Yes                                         | Lab                                                                    | 24      |       |
| 998  | United Kingdom       | 1999-2004  | Hertfordshire Cohort Study                                                                                 | Subnational                 | both                  | 59-73                                 | 59-73 | 1,418                                | 1,579 | Fasting glucose             | Yes                                         | Lab                                                                    |         |       |
| 999  | United Kingdom       | 2003       | The European Male Ageing Study                                                                             | Community                   | both                  |                                       | 40+   |                                      | 389   | Fasting glucose             | Yes                                         | Lab                                                                    |         |       |
| 1000 | United Kingdom       | 2003       | Health Survey for England                                                                                  | National                    | both                  | 18+                                   | 18+   | 7,823                                | 6,408 | Fasting glucose, HbA1c      | Yes                                         | Lab                                                                    | Lab     |       |
| 1001 | United Kingdom       | 2003       | Scottish Health Survey (SHeS)                                                                              | Subnational                 | both                  | 18+                                   | 18+   | 4,370                                | 3,497 | HbA1c                       | Yes                                         | Lab                                                                    | Lab     |       |
| 1002 | United Kingdom       | 2003-2005  | Hertfordshire Ageing Study                                                                                 | Subnational                 | both                  | 72-82                                 | 72-82 | 151                                  | 208   | Fasting glucose, HbA1c      | Yes                                         | Lab                                                                    | Lab     |       |
| 1003 | United Kingdom       | 2004-2005  | English Longitudinal Study of Ageing Wave 2                                                                | National                    | both                  | 52-80                                 | 52-80 | 3,715                                | 3,153 | Fasting glucose, HbA1c      | Yes                                         | Lab                                                                    | Lab     |       |
| 1004 | United Kingdom       | 2005       | Health Survey for England                                                                                  | National                    | both                  | 65+                                   | 65+   | 2,372                                | 1,897 | HbA1c                       | Yes                                         | Lab                                                                    | Lab     |       |
| 1005 | United Kingdom       | 2006       | Health Survey for England                                                                                  | National                    | both                  | 18+                                   | 18+   | 6,561                                | 5,444 | HbA1c                       | Yes                                         | Lab                                                                    | Lab     |       |
| 1006 | United Kingdom       | 2006-2007  | Newcastle 85+ Study                                                                                        | Community                   | urban                 | 84+                                   | 84+   | 431                                  | 283   | Fasting glucose, HbA1c      | No                                          | Lab                                                                    | Lab     |       |
| 1007 | United Kingdom       | 2008       | The European Male Ageing Study                                                                             | Community                   | both                  |                                       | 45+   |                                      | 335   | Fasting glucose             | Yes                                         | Lab                                                                    | 25      |       |
| 1008 | United Kingdom       | 2008       | Health Survey for England                                                                                  | National                    | both                  | 18+                                   | 18+   | 7,960                                | 6,550 | HbA1c                       | Yes                                         | Lab                                                                    | Lab     |       |
| 1009 | United Kingdom       | 2007-2009  | Newcastle 85+ Study                                                                                        | Community                   | urban                 | 85+                                   | 85+   | 311                                  | 187   | HbA1c                       | No                                          | Lab                                                                    | 25      |       |
| 1010 | United Kingdom       | 2008       | Scottish Health Survey (SHeS)                                                                              | Subnational                 | both                  | 18+                                   | 18+   | 3,475                                | 2,772 | HbA1c                       | Yes                                         | Lab                                                                    | Lab     |       |
| 1011 | United Kingdom       | 2008-2009  | English Longitudinal Study of Ageing Wave 4                                                                | National                    | both                  | 50+                                   | 50+   | 4,499                                | 3,674 | Fasting glucose, HbA1c      | Yes                                         | Lab                                                                    | Lab     |       |
| 1012 | United Kingdom       | 2009       | Health Survey for England                                                                                  | National                    | both                  | 18+                                   | 18+   | 2,420                                | 2,050 | HbA1c                       | Yes                                         | Lab                                                                    | Lab     |       |
| 1013 | United Kingdom       | 2006-2010  | MRC National Survey of Health and Development                                                              | National                    | both                  | 60-65                                 | 60-65 | 1,068                                | 969   | Fasting glucose, HbA1c      | Yes                                         | Lab                                                                    | Lab     |       |
| 1014 | United Kingdom       | 2009       | Scottish Health Survey (SHeS)                                                                              | Subnational                 | both                  | 18+                                   | 18+   | 4,089                                | 3,226 | HbA1c                       | Yes                                         | Lab                                                                    | Lab     |       |
| 1015 | United Kingdom       | 2010       | Health Survey for England                                                                                  | National                    | both                  | 18+                                   | 18+   | 4,486                                | 3,598 | HbA1c                       | Yes                                         | Lab                                                                    | Lab     |       |
| 1016 | United Kingdom       | 2008-2012  | National Diet and Nutrition Survey (NDNS)                                                                  | National                    | both                  | 18+                                   | 18+   | 914                                  | 674   | Fasting glucose, HbA1c      | No                                          | Lab                                                                    | Lab     |       |
| 1017 | United Kingdom       | 2009-2010  | Newcastle 85+ Study                                                                                        | Community                   | urban                 | 85+                                   | 85+   | 258                                  | 160   | Fasting glucose, HbA1c      | No                                          | Lab                                                                    | 25      |       |
| 1018 | United Kingdom       | 2010       | Scottish Health Survey (SHeS)                                                                              | Subnational                 | both                  | 18+                                   | 18+   | 3,981                                | 3,047 | HbA1c                       | Yes                                         | Lab                                                                    | Lab     |       |
| 1019 | United Kingdom       | 2010       | Understanding Society: the UK Household Longitudinal Study                                                 | National                    | both                  | 18+                                   | 18+   | 4,709                                | 3,716 | HbA1c                       | No                                          | Lab                                                                    | 26      |       |
| 1020 | United Kingdom       | 2011       | British Household Panel Survey                                                                             | National                    | both                  | 18+                                   | 18+   | 1,385                                | 1,157 | HbA1c                       | No                                          | Lab                                                                    | 26      |       |
| 1021 | United Kingdom       | 2010-2012  | The British Regional Heart Study                                                                           | National                    | urban                 |                                       | 72-91 |                                      | 1,671 | Fasting glucose, HbA1c      | Yes                                         | Lab                                                                    | Unknown |       |
| 1022 | United Kingdom       | 2011       | Health Survey for England                                                                                  | National                    | both                  | 18+                                   | 18+   | 4,584                                | 3,725 | HbA1c                       | Yes                                         | Lab                                                                    | Lab     |       |
| 1023 | United Kingdom       | 2011       | Scottish Health Survey (SHeS)                                                                              | Subnational                 | both                  | 18+                                   | 18+   | 4,093                                | 3,219 | HbA1c                       | Yes                                         | Lab                                                                    | Lab     |       |
| 1024 | United Kingdom       | 2012       | Health Survey for England                                                                                  | National                    | both                  | 18+                                   | 18+   | 4,447                                | 3,580 | HbA1c                       | Yes                                         | Lab                                                                    | Lab     |       |
| 1025 | United Kingdom       | 2012-2013  | English Longitudinal Study of Ageing Wave 6                                                                | National                    | both                  | 50+                                   | 50+   | 4,874                                | 3,945 | Fasting glucose, HbA1c      | Yes                                         | Lab                                                                    | Lab     |       |
| 1026 | United Kingdom       | 2013       | Health Survey for England                                                                                  | National                    | both                  | 18+                                   | 18+   | 4,653                                | 3,815 | HbA1c                       | Yes                                         | Lab                                                                    | Lab     |       |
| 1027 | United Kingdom       | 2014       | Health Survey for England                                                                                  | National                    | both                  | 18+                                   | 18+   | 4,308                                | 3,485 | HbA1c                       | Yes                                         | Lab                                                                    | Lab     |       |
| 1028 | United Kingdom       | 2013-2014  | National Diet and Nutrition Survey (NDNS)                                                                  | National                    | both                  | 18+                                   | 18+   | 407                                  | 281   | Fasting glucose, HbA1c      | No                                          | Lab                                                                    | Lab     |       |
| 1029 | United Kingdom       | 2015       | Health Survey for England                                                                                  | National                    | both                  | 18+                                   | 18+   | 4,290                                | 3,503 | HbA1c                       | Yes                                         | Lab                                                                    | Lab     |       |

|      | Country                  | Data years | Survey/Study name/Citation                                | Level of representativeness | Rural, urban, or both | Age range as used for global analysis |       | Sample size used for global analysis |       | Glycaemic markers available | Information available on diabetes treatment | Whether measured in a laboratory or by a point-of-care portable device |       | Notes |
|------|--------------------------|------------|-----------------------------------------------------------|-----------------------------|-----------------------|---------------------------------------|-------|--------------------------------------|-------|-----------------------------|---------------------------------------------|------------------------------------------------------------------------|-------|-------|
|      |                          |            |                                                           |                             |                       | Female                                | Male  | Female                               | Male  |                             |                                             | Glucose                                                                | HbA1c |       |
| 1030 | United Kingdom           | 2015       | MRC National Survey of Health and Development             | National                    | both                  | 69-70                                 | 69-70 | 1,016                                | 949   | HbA1c                       | Yes                                         |                                                                        |       |       |
| 1031 | United Kingdom           | 2016       | Health Survey for England                                 | National                    | both                  | 18+                                   | 18+   | 4,274                                | 3,461 | HbA1c                       | Yes                                         |                                                                        | Lab   |       |
| 1032 | United Kingdom           | 2015-2016  | National Diet and Nutrition Survey (NDNS)                 | National                    | both                  | 18+                                   | 18+   | 370                                  | 273   | Fasting glucose, HbA1c      | No                                          | Lab                                                                    | Lab   |       |
| 1033 | United Kingdom           | 2015-2018  | British Cohort Study 1970                                 | National                    | both                  | 45-48                                 | 45-48 | 4,426                                | 4,154 | HbA1c                       | Yes                                         |                                                                        | Lab   |       |
| 1034 | United Kingdom           | 2016-2017  | English Longitudinal Study of Ageing Wave 8               | National                    | both                  | 50+                                   | 50+   | 3,650                                | 2,891 | Fasting glucose, HbA1c      | Yes                                         | Lab                                                                    | Lab   |       |
| 1035 | United Kingdom           | 2017       | Health Survey for England                                 | National                    | both                  | 18+                                   | 18+   | 4,318                                | 3,454 | HbA1c                       | Yes                                         |                                                                        | Lab   |       |
| 1036 | United Kingdom           | 2018       | Health Survey for England                                 | National                    | both                  | 18+                                   | 18+   | 4,347                                | 3,576 | HbA1c                       | Yes                                         |                                                                        | Lab   |       |
| 1037 | United Kingdom           | 2016-2019  | National Diet and Nutrition Survey (NDNS)                 | National                    | both                  | 18+                                   | 18+   | 318                                  | 234   | Fasting glucose, HbA1c      | No                                          | Lab                                                                    | Lab   |       |
| 1038 | United Kingdom           | 2018-2019  | English Longitudinal Study of Ageing Wave 9               | National                    | both                  | 50+                                   | 50+   | 3,981                                | 3,053 | Fasting glucose, HbA1c      | Yes                                         | Lab                                                                    | Lab   |       |
| 1039 | United Kingdom           | 2019       | Health Survey for England                                 | National                    | both                  | 18+                                   | 18+   | 4,363                                | 3,588 | HbA1c                       | Yes                                         |                                                                        | Lab   |       |
| 1040 | United Kingdom           | 2019       | Understanding Society: Innovation Panel                   | National                    | both                  | 18+                                   | 18+   | 214                                  | 181   | HbA1c                       | No                                          |                                                                        | Lab   |       |
| 1041 | United States of America | 1976-1980  | US NHANES II                                              | National                    | both                  | 18-74                                 | 18-74 | 6,236                                | 5,594 | Fasting glucose             | Yes                                         | Lab                                                                    |       | 27    |
| 1042 | United States of America | 1985-1986  | Coronary Artery Risk Development in Young Adults (CARDIA) | Subnational                 | urban                 | 18-30                                 | 18-30 | 2,633                                | 2,198 | Fasting glucose             | No                                          | Lab                                                                    |       |       |
| 1043 | United States of America | 1987-1989  | Atherosclerosis Risk in Communities Study                 | Subnational                 | both                  | 44-66                                 | 44-66 | 6,222                                | 5,051 | Fasting glucose             | Yes                                         | Lab                                                                    |       |       |
| 1044 | United States of America | 1989-1990  | Cardiovascular Health Study                               | Subnational                 | both                  | 65+                                   | 65+   | 3,321                                | 2,462 | Fasting glucose             | Yes                                         | Lab                                                                    |       |       |
| 1045 | United States of America | 1990-1992  | Atherosclerosis Risk in Communities Study                 | Subnational                 | both                  | 46-70                                 | 46-70 | 5,631                                | 4,546 | Fasting glucose             | Yes                                         | Lab                                                                    |       |       |
| 1046 | United States of America | 1988-1994  | US NHANES III                                             | National                    | both                  | 20+                                   | 20+   | 9,702                                | 8,806 | Fasting glucose             | Yes                                         | Lab                                                                    |       |       |
| 1047 | United States of America | 1992-1993  | Coronary Artery Risk Development in Young Adults (CARDIA) | Subnational                 | urban                 | 25-37                                 | 25-37 | 1,979                                | 1,670 | Fasting glucose             | No                                          | Lab                                                                    |       |       |
| 1048 | United States of America | 1992-1993  | Cardiovascular Health Study                               | Subnational                 | both                  | 65+                                   | 65+   | 2,971                                | 2,105 | Fasting glucose             | Yes                                         | Lab                                                                    |       |       |
| 1049 | United States of America | 1993-1995  | Atherosclerosis Risk in Communities Study                 | Subnational                 | both                  | 48-73                                 | 48-73 | 5,019                                | 4,004 | Fasting glucose             | Yes                                         | Lab                                                                    |       |       |
| 1050 | United States of America | 1995-1996  | The Bogalusa Heart Study                                  | Community                   | rural                 | 20-37                                 | 20-37 | 790                                  | 515   | Fasting glucose             | No                                          | Lab                                                                    |       |       |
| 1051 | United States of America | 1995-1996  | Coronary Artery Risk Development in Young Adults (CARDIA) | Subnational                 | urban                 | 28-40                                 | 28-40 | 1,923                                | 1,595 | Fasting glucose             | No                                          | Lab                                                                    |       |       |
| 1052 | United States of America | 1996-1998  | Atherosclerosis Risk in Communities Study                 | Subnational                 | both                  | 50-75                                 | 50-75 | 4,497                                | 3,561 | Fasting glucose             | Yes                                         | Lab                                                                    |       |       |
| 1053 | United States of America | 1996-1997  | Cardiovascular Health Study                               | Subnational                 | both                  | 67+                                   | 67+   | 2,504                                | 1,567 | Fasting glucose             | Yes                                         | Lab                                                                    |       |       |
| 1054 | United States of America | 1996-1997  | Study of Women's Health Across the Nation                 | Subnational                 | both                  | 40-55                                 |       | 3,240                                |       | Fasting glucose             | Yes                                         | Lab                                                                    |       | 28    |
| 1055 | United States of America | 1997-1999  | Study of Women's Health Across the Nation                 | Subnational                 | both                  | 40-55                                 |       | 2,862                                |       | Fasting glucose             | Yes                                         | Lab                                                                    |       | 28    |
| 1056 | United States of America | 1999-2000  | US NHANES 1999-2000                                       | National                    | both                  | 18+                                   | 18+   | 2,586                                | 2,546 | Fasting glucose, HbA1c      | Yes                                         | Lab                                                                    | Lab   |       |
| 1057 | United States of America | 1999-2001  | Study of Women's Health Across the Nation                 | Subnational                 | both                  | 40-56                                 |       | 2,694                                |       | Fasting glucose             | Yes                                         | Lab                                                                    |       | 28    |
| 1058 | United States of America | 2000-2001  | Coronary Artery Risk Development in Young Adults (CARDIA) | Subnational                 | urban                 | 33-45                                 | 33-45 | 1,823                                | 1,474 | Fasting glucose             | No                                          | Lab                                                                    |       |       |
| 1059 | United States of America | 2000-2002  | Study of Women's Health Across the Nation                 | Subnational                 | both                  | 40-57                                 |       | 2,658                                |       | Fasting glucose             | Yes                                         | Lab                                                                    |       | 28    |
| 1060 | United States of America | 2001-2002  | US NHANES 2001-2002                                       | National                    | both                  | 18+                                   | 18+   | 2,800                                | 2,844 | Fasting glucose, HbA1c      | Yes                                         | Lab                                                                    | Lab   |       |
| 1061 | United States of America | 2003-2004  | US NHANES 2003-2004                                       | National                    | both                  | 18+                                   | 18+   | 2,654                                | 2,695 | Fasting glucose, HbA1c      | Yes                                         | Lab                                                                    | Lab   |       |
| 1062 | United States of America | 2004       | 2004 New York City HANES                                  | Community                   | urban                 | 20+                                   | 20+   | 1,129                                | 824   | Fasting glucose, HbA1c      | Yes                                         | Lab                                                                    | Lab   |       |
| 1063 | United States of America | 2005-2006  | Coronary Artery Risk Development in Young Adults (CARDIA) | Subnational                 | urban                 | 38-50                                 | 38-50 | 2,010                                | 1,531 | Fasting glucose             | Yes                                         | Lab                                                                    |       |       |
| 1064 | United States of America | 2005-2006  | Cardiovascular Health Study                               | Subnational                 | both                  | 70+                                   | 70+   | 1,018                                | 536   | Fasting glucose             | Yes                                         | Lab                                                                    |       |       |
| 1065 | United States of America | 2005-2006  | US NHANES 2005-2006                                       | National                    | both                  | 18+                                   | 18+   | 2,519                                | 2,671 | Fasting glucose, HbA1c      | Yes                                         | Lab                                                                    | Lab   |       |
| 1066 | United States of America | 2007-2008  | US NHANES 2007-2008                                       | National                    | both                  | 18+                                   | 18+   | 3,100                                | 3,063 | Fasting glucose, HbA1c      | Yes                                         | Lab                                                                    | Lab   |       |
| 1067 | United States of America | 2008-2009  | National Longitudinal Study of Adolescent Health Wave IV  | National                    | both                  | 24-34                                 | 24-34 | 2,761                                | 2,353 | HbA1c                       | Yes                                         |                                                                        | Lab   | 29    |
| 1068 | United States of America | 2009-2010  | US NHANES 2009-2010                                       | National                    | both                  | 18+                                   | 18+   | 3,281                                | 3,174 | Fasting glucose, HbA1c      | Yes                                         | Lab                                                                    | Lab   |       |
| 1069 | United States of America | 2010-2011  | Coronary Artery Risk Development in Young Adults (CARDIA) | Subnational                 | urban                 | 43-55                                 | 43-55 | 1,971                                | 1,510 | Fasting glucose             | Yes                                         | Lab                                                                    |       |       |



|      | Country                  | Data years | Survey/Study name/Citation                                                                            | Level of representativeness | Rural, urban, or both | Age range as used for global analysis |       | Sample size used for global analysis |       | Glycaemic markers available | Information available on diabetes treatment | Whether measured in a laboratory or by a point-of-care portable device |       | Notes |
|------|--------------------------|------------|-------------------------------------------------------------------------------------------------------|-----------------------------|-----------------------|---------------------------------------|-------|--------------------------------------|-------|-----------------------------|---------------------------------------------|------------------------------------------------------------------------|-------|-------|
|      |                          |            |                                                                                                       |                             |                       | Female                                | Male  | Female                               | Male  |                             |                                             | Glucose                                                                | HbA1c |       |
| 1070 | United States of America | 2011-2013  | Atherosclerosis Risk in Communities Study                                                             | Subnational                 | both                  | 67-90                                 | 67-90 | 2,210                                | 1,605 | Fasting glucose, HbA1c      | Yes                                         | Lab                                                                    | Lab   |       |
| 1071 | United States of America | 2011-2012  | US NHANES 2011-2012                                                                                   | National                    | both                  | 18+                                   | 18+   | 2,907                                | 2,894 | Fasting glucose, HbA1c      | Yes                                         | Lab                                                                    | Lab   |       |
| 1072 | United States of America | 2013-2014  | US NHANES 2013-2014                                                                                   | National                    | both                  | 18+                                   | 18+   | 3,128                                | 2,914 | Fasting glucose, HbA1c      | Yes                                         | Lab                                                                    | Lab   |       |
| 1073 | United States of America | 2015-2016  | US NHANES 2015-2016                                                                                   | National                    | both                  | 18+                                   | 18+   | 3,030                                | 2,886 | Fasting glucose, HbA1c      | Yes                                         | Lab                                                                    | Lab   |       |
| 1074 | United States of America | 2017-2018  | US NHANES 2017-2018                                                                                   | National                    | both                  | 18+                                   | 18+   | 2,959                                | 2,839 | Fasting glucose, HbA1c      | Yes                                         | Lab                                                                    | Lab   |       |
| 1075 | United States of America | 2019-2020  | US NHANES 2019-2020                                                                                   | Subnational                 | both                  | 18+                                   | 18+   | 1,923                                | 1,878 | Fasting glucose, HbA1c      | Yes                                         | Lab                                                                    | Lab   | 30    |
| 1076 | Uruguay                  | 1992       | Enfermedades Cardiovasculares                                                                         | National                    | both                  | 19+                                   | 19+   | 574                                  | 449   | Fasting glucose             | No                                          | Unknown                                                                |       |       |
| 1077 | Uruguay                  | 2011-2012  | CESCAS Study                                                                                          | Community                   | urban                 | 35-74                                 | 35-74 | 903                                  | 639   | Fasting glucose             | Yes                                         | Lab                                                                    |       |       |
| 1078 | Uruguay                  | 2013       | STEPS                                                                                                 | National                    | urban                 | 18-64                                 | 18-64 | 1,468                                | 872   | Fasting glucose             | Yes                                         | Lab                                                                    |       |       |
| 1079 | Uruguay                  | 2012-2016  | Genotype, Phenotype and Environment of Hypertension in Uruguay (GEFA-HT-UY)                           | Community                   | urban                 | 19+                                   | 19+   | 193                                  | 130   | Fasting glucose             | Yes                                         | Lab                                                                    |       |       |
| 1080 | Uzbekistan               | 2014       | STEPS                                                                                                 | National                    | both                  | 18-64                                 | 18-64 | 2,176                                | 1,543 | Fasting glucose             | Yes                                         | Portable                                                               |       |       |
| 1081 | Uzbekistan               | 2015-2016  | Epidemiology of Diabetes and Prediabetes in Uzbekistan Screening Results                              | Subnational                 | both                  | 35+                                   | 35+   | 1,511                                | 714   | Fasting glucose, HbA1c      | Yes                                         | Portable                                                               | Lab   |       |
| 1082 | Uzbekistan               | 2019       | STEPS                                                                                                 | National                    | both                  | 18-69                                 | 18-69 | 2,260                                | 1,488 | Fasting glucose             | Yes                                         | Portable                                                               |       |       |
| 1083 | Vanuatu                  | 1998       | Vanuatu Non-communicable Disease Survey                                                               | National                    | both                  | 20-59                                 | 20-59 | 179                                  | 185   | Fasting glucose             | No                                          | Unknown                                                                |       |       |
| 1084 | Vanuatu                  | 2011       | STEPS                                                                                                 | National                    | both                  | 25-64                                 | 25-64 | 2,236                                | 2,312 | Fasting glucose             | Yes                                         | Portable                                                               |       |       |
| 1085 | Venezuela                | 2000       | Zulia Coronary Heart Disease Risk Factor Study; Florez et al., Diabetes Res Clin Pract 69:63-77, 2005 | Subnational                 | both                  | 25+                                   | 25+   | 2,552                                | 1,120 | Fasting glucose             | No                                          | Unknown                                                                |       |       |
| 1086 | Venezuela                | 1998-2001  | Maracaibo aging study Santa lucia cohort                                                              | Community                   | urban                 | 55+                                   | 55+   | 1,609                                | 787   | Fasting glucose             | Yes                                         | Lab                                                                    |       |       |
| 1087 | Venezuela                | 2004-2005  | CArdiovascular Risk factors Multiple Evaluation in Latin America (CARMELA)                            | Community                   | urban                 | 25-64                                 | 25-64 | 1,135                                | 713   | Fasting glucose             | Yes                                         | Lab                                                                    |       |       |
| 1088 | Venezuela                | 2005-2006  | Brajkovich et al., Rev Ven Endoc Metab 4(3):31-32, 2006                                               | Community                   | urban                 | 20-65                                 | 20-65 | 331                                  | 114   | Fasting glucose             | No                                          | Lab                                                                    |       |       |
| 1089 | Venezuela                | 2007-2008  | Venezuelan Study of Metabolic Syndrome, Obesity and Lifestyle (VEMSOLS)                               | Community                   | urban                 | 20+                                   | 20+   | 229                                  | 107   | Fasting glucose             | Yes                                         | Lab                                                                    |       |       |
| 1090 | Venezuela                | 2008-2009  | Venezuelan Study of Metabolic Syndrome, Obesity and Lifestyle (VEMSOLS)                               | Community                   | rural                 | 20+                                   | 20+   | 89                                   | 51    | Fasting glucose             | Yes                                         | Lab                                                                    |       |       |
| 1091 | Venezuela                | 2010-2011  | Cardiometabolic risk factors in schoolchildren and adolescents of Mérida, Venezuela (CREDEFAR)        | Community                   | urban                 | 18                                    | 18    | 13                                   | 12    | Fasting glucose             | Yes                                         | Lab                                                                    |       |       |
| 1092 | Venezuela                | 2010-2011  | Venezuelan Study of Metabolic Syndrome, Obesity and Lifestyle (VEMSOLS)                               | Community                   | urban                 | 20+                                   | 20+   | 154                                  | 51    | Fasting glucose             | No                                          | Lab                                                                    |       |       |
| 1093 | Venezuela                | 2015-2017  | Cardio-Metabolic Health Venezuelan Study (EVESCAM)                                                    | National                    | both                  | 20+                                   | 20+   | 2,347                                | 1,059 | Fasting glucose             | Yes                                         | Lab                                                                    |       |       |
| 1094 | Venezuela                | 2014-2017  | Maracaibo aging study Santa Rosa cohort                                                               | Community                   | urban                 | 37+                                   | 37+   | 292                                  | 116   | Fasting glucose, HbA1c      | Yes                                         | Lab                                                                    | Lab   |       |
| 1095 | Venezuela                | 2018-2020  | Cardio-metabolic Health Venezuelan Study (EVESCAM) follow-up                                          | National                    | both                  | 22+                                   | 22+   | 890                                  | 354   | Fasting glucose             | Yes                                         | Lab                                                                    |       |       |
| 1096 | Viet Nam                 | 1990       | Quoc et al., Am J Epidemiol 139:713-22, 1994                                                          | Community                   | both                  | 25-69                                 | 25-69 | 2,061                                | 1,712 | Fasting glucose             | No                                          | Unknown                                                                |       |       |
| 1097 | Viet Nam                 | 2001       | Duc Son et al., Diabet Med 21:371-6, 2004                                                             | Community                   | both                  | 25+                                   | 25+   | 2,001                                | 654   | Fasting glucose             | No                                          | Unknown                                                                |       |       |
| 1098 | Viet Nam                 | 2005       | Non-communicable disease risk factors in Ho Chi Minh City                                             | Community                   | urban                 | 25-64                                 | 25-64 | 1,029                                | 887   | Fasting glucose             | No                                          | Portable                                                               |       |       |
| 1099 | Viet Nam                 | 2008-2009  | The Survey on Diabetes and Its Risk Factors                                                           | Subnational                 | both                  | 25+                                   | 25+   | 1,357                                | 795   | Fasting glucose, HbA1c      | Yes                                         | Lab                                                                    | Lab   |       |
| 1100 | Viet Nam                 | 2009       | STEPS                                                                                                 | National                    | both                  | 25-64                                 | 25-64 | 7,754                                | 6,677 | Fasting glucose             | Yes                                         | Portable                                                               |       |       |
| 1101 | Viet Nam                 | 2012       | National Survey of Diabetes in Vietnam                                                                | National                    | both                  | 30-69                                 | 30-69 | 3,869                                | 3,495 | Fasting glucose             | No                                          | Portable                                                               |       |       |
| 1102 | Viet Nam                 | 2015       | STEPS                                                                                                 | National                    | both                  | 18-69                                 | 18-69 | 2,043                                | 1,669 | Fasting glucose             | Yes                                         | Portable                                                               |       |       |
| 1103 | Viet Nam                 | 2021       | STEPS                                                                                                 | National                    | both                  | 18+                                   | 18+   | 2,172                                | 2,200 | Fasting glucose             | Yes                                         | Portable                                                               |       |       |
| 1104 | Yemen                    | 2007-2009  | Hypertension and Diabetes in Yemen (HYDY)                                                             | National                    | rural                 | 18-70                                 | 18-70 | 2,408                                | 2,358 | Fasting glucose             | Yes                                         | Portable                                                               |       |       |
| 1105 | Yemen                    | 2007-2009  | Hypertension and Diabetes in Yemen (HYDY)                                                             | National                    | urban                 | 18-70                                 | 18-70 | 2,432                                | 2,351 | Fasting glucose             | Yes                                         | Portable                                                               |       |       |
| 1106 | Zambia                   | 2008       | STEPS                                                                                                 | Subnational                 | urban                 | 25+                                   | 25+   | 1,219                                | 631   | Fasting glucose             | Yes                                         | Unknown                                                                |       |       |
| 1107 | Zambia                   | 2017       | STEPS                                                                                                 | National                    | both                  | 18-69                                 | 18-69 | 2,513                                | 1,614 | Fasting glucose             | Yes                                         | Portable                                                               |       |       |
| 1108 | Zimbabwe                 | 2005       | Zimbabwe Non-Communicable Disease Risk Factors (ZINCoDs/STEPS)                                        | National                    | both                  | 25+                                   | 25+   | 1,393                                | 444   | Fasting glucose             | No                                          | Lab                                                                    |       |       |

- Sciensano, OD Public health and surveillance (2020). Health Interview Survey 2018 [Data file and code book]. Conditionally obtainable from the Sciensano website: <https://www.sciensano.be/en/node/55737/health-interview-survey-microdata-request-procedure>.
- National studies from 2023 were assigned to 2022 so that they inform the estimates in countries with slightly later national data.
- The first age group started from 15 years old, but had mean age ≥18 years.
- The bibliographic citation for this data source is: Zeng, Yi, and Vaupel, James W. Chinese Longitudinal Healthy Longevity Survey (CLHLS), Biomarkers Datasets, 2009, 2012, 2014. Inter-university Consortium for Political and Social Research [distributor], 2019-01-15. <https://doi.org/10.3886/CPSR37226.v1>.
- This research uses data from China Health and Nutrition Survey (CHNS). We thank the National Institute for Health (NIH), the Eunice Kennedy Shriver National Institute of Child Health and Human Development (NICHD) for R01 HD30880, National Institute on Aging (NIA) for R01 AG065357, National Institute of Diabetes and Digestive and Kidney Diseases (NIDDK) for R01 DK104371 and P30 DK056350, National Heart, Lung, and Blood Institute (NHLBI) for R01 HL108427, the NIH Fogarty grant D43 TV009077, the Carolina Population Center for P2C HD050924 and P30 AG066615. We also thank the National Institute for Nutrition and Health, China Center for Disease Control and Prevention; Beijing Municipal Center for Disease Control and Prevention; the Chinese National Human Genome Center at Shanghai; and the China-Japan Friendship Hospital, National Health Commission of China.
- The bibliographic citation for this data source is: Center for Healthy Aging and Development Studies, 2020. "The Chinese Longitudinal Healthy Longevity Survey (CLHLS)-Longitudinal Data (1998-2018)", <https://doi.org/10.18170/DVN/WB07LK>, Peking University Open Research Data Platform, V2.
- Santé publique France, en tant qu'investigateur principal, promoteur et financeur de l'étude ENNS; Aux Centres d'examen de santé de la Caisse nationale d'assurance maladie des travailleurs salariés (CnamTS) et leurs laboratoires.
- Santé publique France, en tant qu'investigateur principal, promoteur et financeur de l'étude Esteban; Aux Centres d'examen de santé de la Caisse nationale d'assurance maladie des travailleurs salariés (CnamTS) et leurs laboratoires.
- The authors thank the Heinz Nixdorf Foundation [Chairman: Martin Nixdorf; Past Chairmen: Dr jur. Gerhard Schmidt], for their generous support of this study. Parts of the study were also supported by the German Research Council (DFG) [DFG project: EI 969/2-3, ER 155/6-1/6-2, HO 3314/2-1:2-2:3-4-3, INST 58219/32-1, JO 170/8-1, KN 885/3-1, PE 2309/2-1, SI 236/8-1:9-1:10-1], the German Ministry of Education and Science [BMBF project: 01EG0401, 01G10856, 01G10860, 01GS0820\_WB2-C, 01ER1001D, 01G10205], the Ministry of Innovation, Science, Research and Technology, North Rhine-Westphalia (MIW/FT-NRW), the Else Kröner-Fresenius-Stiftung [project: 2015\_A119] and the German Social Accident Insurance [DGUV project: FF-FP295]. Furthermore the study was supported by the Competence Network for HIV/AIDS, the deanship of the University Hospital and IFO/AIDS, the European Union, the German Competence Network Heart Failure, Kulturstiftung Essen, the Protein Research Unit within Europe (PURE), the Dr. Werner-Jackstädt Stiftung and the following companies: Celgene GmbH München, Imatron/GE-Imatron, Janssen, Merck KG, Philips, ResMed Foundation, Roche Diagnostics, Sarstedt AG&Co, Siemens HealthCare Diagnostics, Volkswagen Foundation. The authors express their gratitude to all study participants of the Heinz Nixdorf Recall (HNR) Study, the personnel of the HNR study center and the EBT-scanner facilities, the investigative group and all former employees of the HNR study. The authors also thank the Advisory Board of the HNR Study: T. Meinertz, Hamburg, Germany (Chair); C. Bode, Freiburg, Germany; P.J. de Feyter, Rotterdam, Netherlands; B. Güntert, Hall i.T., Austria; F. Gutzwiller, Bern, Switzerland; H. Heinen, Bonn, Germany; O. Hess (†), Bern, Switzerland; B. Klein (†), Essen, Germany; H. Löwel, Neuberberg, Germany; M. Reiser, Munich, Germany; G. Schmidt (†), Essen, Germany; M. Schwaiger, Munich, Germany; C. Steinmüller, Bonn, Germany; T. Theorell, Stockholm, Sweden; and S.N. Willich, Berlin, Germany.
- Data have been provided by the Study of Health in Pomerania (SHIP) from the University Medicine Greifswald.
- The CARRS Study was funded in part by the National Heart, Lung, and Blood Institute (NHLBI), National Institutes of Health (NIH), Department of Health and Human Services, under Contract No. HHSN26820090026C, the United Health Group, Minneapolis, MN, USA, and by the National Heart, Lung, and Blood Institute of the National Institutes of Health under Award Number P01HL154996.
- Data on diabetes treatment were collected in the questionnaire from all participants, and at the time of examination which was done in randomly selected subset of 2,500 of the 30,000 PSUs. At the time of this analysis, only the data on diabetes treatment collected at the time of physical examination was available to us and was used in the analysis.
- The Older Persons in Jamaica Study was funded by the National Health Fund, Jamaica.
- The study was supported by the grant of the Ministry of Healthcare of the Republic of Kazakhstan "National Programme for the Introduction of Personalized and Preventive Medicine in The Republic of Kazakhstan (2021–2023)" (Grant number OR12165486).
- The National Nutrition Survey of Kuwait (2008-2009) which was supported by The Kuwait Foundation for Advancement Sciences (KFAS) Grant # 2003-1202-02.
- The MHAS Cognitive Aging Ancillary Study (Mex-Cog) is sponsored by the National Institutes of Health/National Institute on Aging (NIH R01AG051158). Data files and documentation are public use and available at [www.MHASweb.org](http://www.MHASweb.org).

17. The Longitudinal Aging Study Amsterdam is supported by a grant from the Netherlands Ministry of Health Welfare and Sports, Directorate of Long-Term Care.
18. Data on 1,216 participants from one specific area in this study, which had high prevalence of thalassemia, were excluded. Glycaemic measurements in these participants were systematically different from the rest from the same study, possibly because of the high thalassemia prevalence.<sup>41</sup>
19. The bibliographic citation for this data source is: Am J Hypertens 2009 Jan;22(1):100-5 and Atherosclerosis. 2009 Mar;203(1):257-62.
20. Dr Take Naseri (Ministry of Health, Samoa), and Muagutua Sefuiva Reupena (Lutia I Puava Ae Mapu I Fagalele) contributed to the GWAS studies in Samoa.
21. The SP2 and SCCS2 studies are supported by individual research and clinical scientist award schemes from National Medical Research Council (NMRC) and the Biomedical Research Council (BMRC) of Singapore, the Singapore Ministry of Health, National University of Singapore and University Health System, Singapore.
22. The SH2012 and SH2 studies are supported by infrastructure funding from the Singapore Ministry of Health (Population Health Metrics Population Health Metrics and Analytics PHMA), National University of Singapore and National University Health System, Singapore.
23. The ULSAM study was supported by Uppsala University and Uppsala University Hospital.
24. The British Women's Heart and Health Study is supported by the British Heart Foundation (PG/13/66/30442). British Women's Heart and Health Study data are available to bona fide researchers for research purposes. Please refer to the BWHHS data sharing policy at <http://www.ucl.ac.uk/british-womens-heart-health-study>.
25. The Newcastle 85+ Study has been funded by the Medical Research Council, Biotechnology and Biological Sciences Research Council, the Dunhill Medical Trust and the National Institute for Health Research School for Primary Care. Parts of the work have also been funded by the British Heart Foundation, Unilever Corporate Research, Newcastle University, NHS North of Tyne (Newcastle Primary Care Trust). Mortality data was obtained from NHS Digital. We acknowledge the operational support of the North of England Commissioning Support Unit, the National Institute for Health Research Clinical Research Network North East and North Cumbria, local general practitioners and their staff. We thank the research nurses, laboratory technicians, data management and clerical team for their work throughout, as well as many colleagues for their expert advice. Thanks are due especially to the study participants and, where appropriate, their families and carers.
26. University of Essex. Institute for Social and Economic Research and National Centre for Social Research, Understanding Society: Waves 2 and 3 Nurse Health Assessment, 2010- 2012 [data collection]. 5th Edition. UK Data Service. SN:7251. <http://doi.org/10.5255/UKDA-SN-7251-5>.
27. National studies for the 3 years prior to 1980 were assigned to 1980 so that they inform the estimates in countries with slightly earlier national data.
28. The bibliographic citation for this data source is: Sutton-Tyrrell, Kim, Faith Selzer, MaryFran Sowers, Robert Neer, Lynda Powell, Ellen Gold, Gail Greendale, Gerson Weiss, Karen Matthews, and Sonja McKinlay. Study of Women's Health Across the Nation (SWAN), 1996-1997: Baseline Dataset. ICPSR28762-v2. Ann Arbor, MI: Inter-university Consortium for Political and Social Research[distributor], 2014-02-04. <http://doi.org/10.3886/ICPSR28762.v2>.
29. This research uses data from Add Health, a program project designed by J. Richard Udry, Peter S. Bearman, and Kathleen Mullan Harris, and funded by a grant P01-HD31921 from the Eunice Kennedy Shriver National Institute of Child Health and Human Development, with cooperative funding from 17 other agencies. Special acknowledgment is due Ronald R. Rindfuss and Barbara Entwisle for assistance in the original design. Persons interested in obtaining data files from Add Health should contact Add Health, Carolina Population Center, 123 W. Franklin Street, Chapel Hill, NC 27516-2524 ([addhealth@unc.edu](mailto:addhealth@unc.edu)). No direct support was received from grant P01-HD31921 for this analysis.
30. Due to the COVID-19 pandemic the NHANES 2019-2020 cycle was not completed. As a result the data are not nationally representative and were considered subnational.

**Appendix Table 2.** List of analysis regions and super-regions, and countries in each region.

| Super-region                               | Region                                                                                                                                                                                                                                                               |
|--------------------------------------------|----------------------------------------------------------------------------------------------------------------------------------------------------------------------------------------------------------------------------------------------------------------------|
| Central and eastern Europe                 | <b>Central Europe:</b> Albania, Bosnia and Herzegovina, Bulgaria, Croatia, Czechia, Hungary, Montenegro, North Macedonia, Poland, Romania, Serbia, Slovakia, Slovenia                                                                                                |
|                                            | <b>Eastern Europe:</b> Belarus, Estonia, Latvia, Lithuania, Moldova, Russian Federation, Ukraine                                                                                                                                                                     |
| Central Asia, Middle East and north Africa | <b>Central Asia:</b> Armenia, Azerbaijan, Georgia, Kazakhstan, Kyrgyzstan, Mongolia, Tajikistan, Turkmenistan, Uzbekistan                                                                                                                                            |
|                                            | <b>Middle East and north Africa:</b> Algeria, Bahrain, Egypt, Iran, Iraq, Jordan, Kuwait, Lebanon, Libya, Morocco, Oman, Qatar, Saudi Arabia, State of Palestine, Syrian Arab Republic, Tunisia, Türkiye, United Arab Emirates, Yemen                                |
| High-income western                        | <b>High-income English-speaking countries*:</b> Australia, Canada, Ireland, New Zealand, United Kingdom, United States of America                                                                                                                                    |
|                                            | <b>Northwestern Europe:</b> Austria, Belgium, Denmark, Finland, Germany, Greenland, Iceland, Luxembourg, Netherlands, Norway, Sweden, Switzerland                                                                                                                    |
|                                            | <b>Southwestern Europe:</b> Andorra, Cyprus, France, Greece, Israel, Italy, Malta, Portugal, Spain                                                                                                                                                                   |
| Latin America and the Caribbean            | <b>Andean Latin America:</b> Bolivia, Ecuador, Peru                                                                                                                                                                                                                  |
|                                            | <b>The Caribbean:</b> Antigua and Barbuda, Bahamas, Barbados, Belize, Bermuda, Cuba, Dominica, Dominican Republic, Grenada, Guyana, Haiti, Jamaica, Puerto Rico, Saint Kitts and Nevis, Saint Lucia, Saint Vincent and the Grenadines, Suriname, Trinidad and Tobago |
|                                            | <b>Central Latin America:</b> Colombia, Costa Rica, El Salvador, Guatemala, Honduras, Mexico, Nicaragua, Panama, Venezuela                                                                                                                                           |
|                                            | <b>Southern Latin America:</b> Argentina, Brazil, Chile, Paraguay, Uruguay                                                                                                                                                                                           |
| Pacific island nations                     | <b>Melanesia:</b> Fiji, Papua New Guinea, Solomon Islands, Vanuatu                                                                                                                                                                                                   |
|                                            | <b>Polynesia and Micronesia:</b> American Samoa, Cook Islands, French Polynesia, Kiribati, Marshall Islands, Federated States of Micronesia, Nauru, Niue, Palau, Samoa, Tokelau, Tonga, Tuvalu                                                                       |
| South Asia                                 | <b>South Asia:</b> Afghanistan, Bangladesh, Bhutan, India, Nepal, Pakistan, Sri Lanka                                                                                                                                                                                |
| East and southeast Asia and the Pacific    | <b>East Asia and the Pacific:</b> China, Japan, Singapore, South Korea, Taiwan                                                                                                                                                                                       |
|                                            | <b>Southeast Asia:</b> Brunei Darussalam, Cambodia, Indonesia, Lao PDR, Malaysia, Maldives, Myanmar, North Korea, Philippines, Thailand, Timor-Leste, Viet Nam                                                                                                       |
| Sub-Saharan Africa                         | <b>Central and southern Africa:</b> Angola, Botswana, Central African Republic, Congo, DR Congo, Equatorial Guinea, Gabon, Namibia                                                                                                                                   |
|                                            | <b>East Africa:</b> Burundi, Comoros, Djibouti, Eritrea, Eswatini, Ethiopia, Kenya, Lesotho, Madagascar, Malawi, Mozambique, Rwanda, Somalia, South Sudan, Sudan, Tanzania, Uganda, Zambia, Zimbabwe                                                                 |
|                                            | <b>West Africa:</b> Benin, Burkina Faso, Cabo Verde, Cameroon, Chad, Côte d'Ivoire, Gambia, Ghana, Guinea, Guinea Bissau, Liberia, Mali, Mauritania, Niger, Nigeria, Sao Tome and Principe, Senegal, Sierra Leone, Togo                                              |
|                                            | <b>Other sub-Saharan Africa:</b> Mauritius, Seychelles, South Africa                                                                                                                                                                                                 |

\* Although high-income English-speaking countries are geographically separated, they experienced similar trends in cardiometabolic risk factors and outcomes.<sup>1,2,16,32-38</sup> They were therefore grouped together so that the statistical model shares information amongst them more than it does with other countries that are geographically closer but epidemiologically more distinct.

**Appendix Table 3.** Global age-standardised diabetes prevalence and number of people with diabetes in 1990 and 2022 for women and men aged 18+ years and 30+ years. Numbers in brackets are 95% credible intervals.

|                          |              |      | <b>18+ years</b>    | <b>30+ years</b>    |
|--------------------------|--------------|------|---------------------|---------------------|
| <b>Prevalence (%)</b>    | <b>Women</b> | 1990 | 6.9 (5.7-8.1)       | 9.1 (7.6-10.7)      |
|                          |              | 2022 | 13.9 (12.3-15.8)    | 17.3 (15.4-19.5)    |
|                          | <b>Men</b>   | 1990 | 6.8 (5.7-8.0)       | 8.9 (7.6-10.4)      |
|                          |              | 2022 | 14.3 (12.5-16.4)    | 17.9 (15.7-20.4)    |
| <b>Number (millions)</b> | <b>Women</b> | 1990 | 103.7 (86.1-123.0)  | 97.0 (81.3-114.3)   |
|                          |              | 2022 | 419.8 (372.2-473.5) | 381.3 (340.0-428.4) |
|                          | <b>Men</b>   | 1990 | 93.8 (78.4-110.9)   | 86.1 (72.5-100.8)   |
|                          |              | 2022 | 408.0 (356.2-466.8) | 367.4 (322.2-418.1) |

**Appendix Table 4.** Comparison of age-standardised diabetes prevalence estimates in this work with recent global studies.

|              |             | Ong et al., 2023 <sup>39</sup> | Sun et al., 2022 <sup>40</sup> | NCD-RisC<br>(this study) |
|--------------|-------------|--------------------------------|--------------------------------|--------------------------|
| <b>Women</b> | 0+ years    | 5.8 (5.4-6.1)                  | n.a.                           | n.a.                     |
|              | 20-79 years | n.a.                           | 10.2                           | 14.1 (12.4-16.0)         |
|              | 18+ years   | n.a.                           | n.a.                           | 13.9 (12.3-15.8)         |
| <b>Men</b>   | 0+ years    | 6.5 (6.2-7.0)                  | n.a.                           | n.a.                     |
|              | 20-79 years | n.a.                           | 10.8                           | 14.6 (12.7-16.7)         |
|              | 18+ years   | n.a.                           | n.a.                           | 14.3 (12.5-16.4)         |

Estimates from Ong et al. (2023) and Sun et al. (2022) are for 2021. Estimates from this study are for 2022.  
n.a. = not available.

**Appendix Table 5.** Comparison of data sources and estimates of diabetes prevalence in this work with recent global studies, for the 30 countries with the largest adult population in 2022. For each country, the table shows the year of the most recent data source used and diabetes prevalence estimates.

| Country                   | Years of the most recent data sources <sup>†</sup> |                                |                       | Estimates of age-standardised diabetes prevalence (%) <sup>‡</sup> |                                              |                      |                  |
|---------------------------|----------------------------------------------------|--------------------------------|-----------------------|--------------------------------------------------------------------|----------------------------------------------|----------------------|------------------|
|                           | Ong et al., 2023 <sup>39</sup>                     | Sun et al., 2022 <sup>40</sup> | NCD-RisC (this study) | Ong et al., 2023 <sup>39</sup> (0+ years)                          | Sun et al., 2022 <sup>40</sup> (20-79 years) | NCD-RisC (18+ years) |                  |
|                           |                                                    |                                |                       |                                                                    |                                              | Women                | Men              |
| <b>China</b>              | 2016 (2013)                                        | 2017 (2017)                    | 2018 (2015)           | 6.2 (5.7-6.6)                                                      | 10.6                                         | 9.4 (5.4-14.7)       | 12.9 (7.4-19.7)  |
| <b>India</b>              | 2017 (2014)                                        | 2015 (2015)                    | 2021 (2018)           | 5.8 (5.4-6.4)                                                      | 9.6                                          | 23.7 (18.0-29.9)     | 21.4 (16.4-27.1) |
| <b>USA</b>                | 2018 (2018)                                        | 2016 (2016)                    | 2020 (2018)           | 9.0 (8.6-9.5)                                                      | 10.7                                         | 11.4 (7.5-16.3)      | 13.6 (9.4-18.6)  |
| <b>Indonesia</b>          | 2008 (2008)                                        | 2018 (2018)                    | 2018 (2018)           | 4.6 (4.2-5.0)                                                      | 10.6                                         | 14.5 (8.4-22.7)      | 10.9 (5.9-17.6)  |
| <b>Brazil</b>             | 2008 (n.a.)                                        | 2019* (2019*)                  | 2016 (2013)           | 5.4 (5.0-5.9)                                                      | 8.8                                          | 14.0 (7.4-23.2)      | 11.7 (5.7-20.4)  |
| <b>Pakistan</b>           | 2011 (n.a.)                                        | 2017 (2017)                    | 2017 (2017)           | 7.1 (6.6-7.8)                                                      | 30.8                                         | 30.9 (21.0-42.1)     | 30.8 (21.3-42.1) |
| <b>Bangladesh</b>         | 2018 (2018)                                        | 2018 (2018)                    | 2018 (2018)           | 7.1 (6.7-7.6)                                                      | 14.2                                         | 19.7 (12.9-27.7)     | 16.1 (9.9-23.7)  |
| <b>Russian Federation</b> | 2020 (n.a.)                                        | 2020 (2020)                    | 2020 (2014)           | 4.0 (3.7-4.3)                                                      | 5.6                                          | 8.3 (4.5-13.6)       | 7.6 (4.0-12.7)   |
| <b>Nigeria</b>            | 2005 (n.a.)                                        | 2007 (2007)                    | 2011 (n.a.)           | 3.7 (3.4-4.0)                                                      | 3.6                                          | 11.2 (3.2-24.2)      | 10.7 (3.4-22.6)  |
| <b>Japan</b>              | 2017 (2017)                                        | 2011* (2011*)                  | 2023 (2019)           | 5.9 (5.4-6.4)                                                      | 6.6                                          | 4.3 (2.8-6.2)        | 8.5 (6.2-11.4)   |
| <b>Mexico</b>             | 2019 (2019)                                        | 2012 (2012)                    | 2022 (2022)           | 9.1 (8.4-9.8)                                                      | 16.9                                         | 15.2 (12.4-18.2)     | 13.2 (10.5-16.1) |
| <b>Philippines</b>        | 2014 (2014)                                        | 2008 (2008)                    | 2021 (2021)           | 4.4 (4.1-4.8)                                                      | 7.1                                          | 13.8 (8.6-19.9)      | 12.5 (7.8-18.8)  |
| <b>Viet Nam</b>           | 2015 (2015)                                        | 2013 (2009)                    | 2021 (2021)           | 4.5 (4.3-4.8)                                                      | 6.1                                          | 11.1 (7.0-16.5)      | 10.4 (6.4-15.7)  |
| <b>Germany</b>            | 2008 (n.a.)                                        | 2015* (2015*)                  | 2019 (2012)           | 4.8 (4.4-5.2)                                                      | 6.9                                          | 5.2 (2.5-9.2)        | 8.0 (4.4-12.8)   |
| <b>Egypt</b>              | 2012 (2012)                                        | 2017 (2017)                    | 2017 (2017)           | 8.4 (7.7-9.2)                                                      | 20.9                                         | 28.8 (18.7-40.2)     | 26.3 (16.4-37.6) |
| <b>Ethiopia</b>           | 2015 (2015)                                        | 2015 (2015)                    | 2015 (2015)           | 3.4 (3.1-3.6)                                                      | 5.0                                          | 7.4 (2.6-14.7)       | 6.2 (2.3-12.6)   |
| <b>Iran</b>               | 2011 (2011)                                        | 2007 (2007)                    | 2021 (2021)           | 6.9 (6.3-7.5)                                                      | 9.1                                          | 15.2 (12.3-18.6)     | 14.2 (11.2-17.5) |
| <b>Türkiye</b>            | 2011 (2011)                                        | 2010 (2010)                    | 2017 (2017)           | 6.6 (6.1-7.2)                                                      | 14.5                                         | 17.1 (10.6-24.7)     | 16.0 (10.0-23.3) |
| <b>Thailand</b>           | 2009 (2009)                                        | 2014 (2014)                    | 2020 (2020)           | 5.4 (4.9-5.9)                                                      | 9.7                                          | 12.8 (8.6-18.0)      | 11.7 (7.7-16.6)  |
| <b>UK</b>                 | 2013 (2013)                                        | 2021* (2021*)                  | 2019 (2019)           | 7.8 (7.2-8.3)                                                      | 6.3                                          | 7.9 (5.5-10.8)       | 9.7 (7.0-12.7)   |

|                     |             |               |             |                 |      |                 |                  |
|---------------------|-------------|---------------|-------------|-----------------|------|-----------------|------------------|
| <b>France</b>       | 2007 (2007) | 2016 (2016)   | 2023 (2019) | 3.6 (3.4-4.0)   | 5.3  | 1.8 (1.1-2.7)   | 3.7 (2.5-5.2)    |
| <b>Italy</b>        | 2012 (2012) | 2005* (2005*) | 2020 (2012) | 4.7 (4.3-5.2)   | 6.4  | 5.1 (2.7-8.4)   | 9.5 (5.7-14.1)   |
| <b>DR Congo</b>     | 2007 (2005) | n.a. (n.a.)   | 2017 (n.a.) | 4.8 (4.3-5.1)   | 5.8  | 10.0 (3.8-19.5) | 8.7 (3.4-17.1)   |
| <b>South Korea</b>  | 2019 (2019) | 2015 (2015)   | 2023 (2023) | 10.3 (9.8-10.8) | 6.8  | 8.1 (6.7-9.6)   | 12.6 (10.6-14.7) |
| <b>South Africa</b> | 2005 (n.a.) | 2012* (2012*) | 2020 (2012) | 5.9 (5.5-6.3)   | 10.8 | 15.5 (7.8-25.6) | 11.9 (5.8-20.1)  |
| <b>Spain</b>        | 2011 (2010) | 2010 (2010)   | 2019 (2015) | 6.9 (6.4-7.3)   | 10.3 | 2.6 (1.3-4.4)   | 4.6 (2.6-7.2)    |
| <b>Colombia</b>     | 2015 (2015) | 2010 (n.a.)   | 2016 (2016) | 6.1 (5.7-6.5)   | 8.3  | 12.2 (6.0-20.6) | 12.3 (6.0-21.6)  |
| <b>Myanmar</b>      | 2014 (2014) | 2014 (2014)   | 2014 (2014) | 8.0 (7.5-8.5)   | 7.1  | 14.9 (7.2-25.1) | 12.5 (5.9-21.6)  |
| <b>Argentina</b>    | 1995 (n.a.) | 1995 (n.a.)   | 2018 (2018) | 5.5 (5.0-6.0)   | 5.4  | 10.4 (5.4-17.0) | 10.7 (5.8-17.1)  |
| <b>Tanzania</b>     | 2012 (2012) | 2012 (2012)   | 2023 (2023) | 2.6 (2.4-2.8)   | 12.3 | 7.3 (4.1-11.6)  | 5.8 (3.3-9.3)    |

† For each country, the first number shows the year of the most recent data source, and the number in brackets shows the year of the most recent national data source. Data sources that only reported type 1 diabetes are not included in this table because type 1 diabetes is an outcome only in Ong et al. (2023) but not in Sun et al. (2022) or this study.

‡ Estimates from Ong et al. (2023) and Sun et al. (2022) are for both sexes in 2021. Estimates from this study are for 2022. Numbers in brackets are 95% uncertainty intervals, when reported.

\* Data were based on self-reported diabetes diagnosis, medical records, or a registry of people with diagnosed diabetes, handled as described in Research in Context panel. n.a. = not available.

**Appendix Figure 1.** Number of data sources used in this analysis, by country.



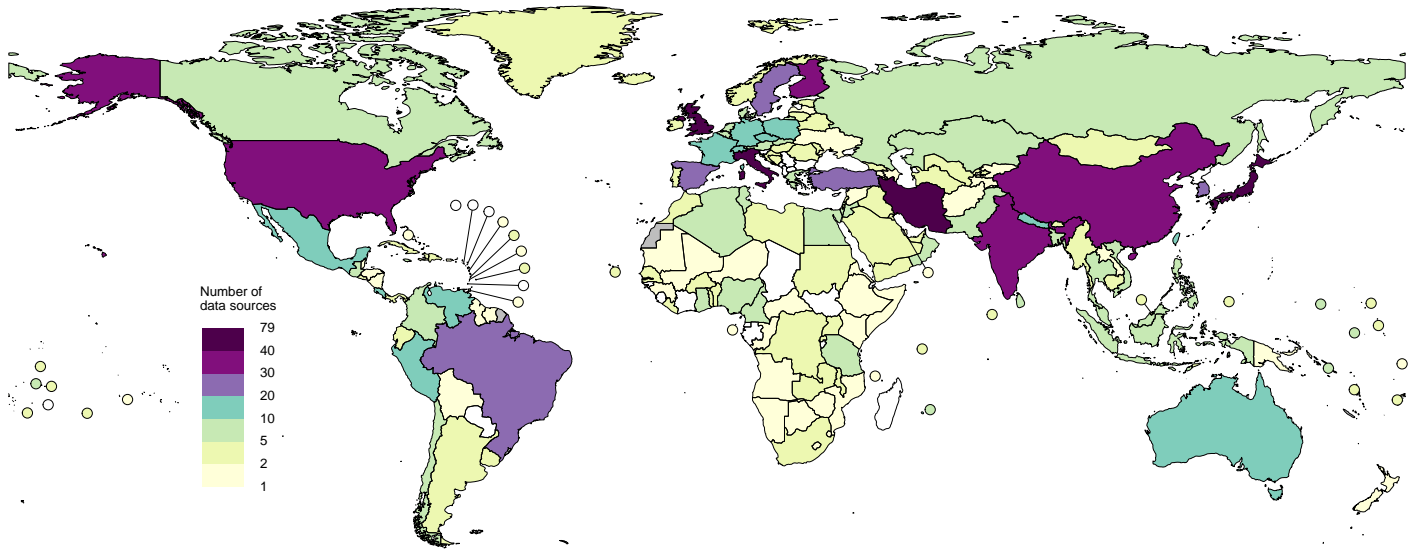

Number of data sources

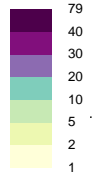

**Appendix Figure 2.** Number of data sources used in this paper, by region and year. The size of each circle shows the number of data sources for each region and year, and the colours indicate the relative count of national, subnational and community data sources.

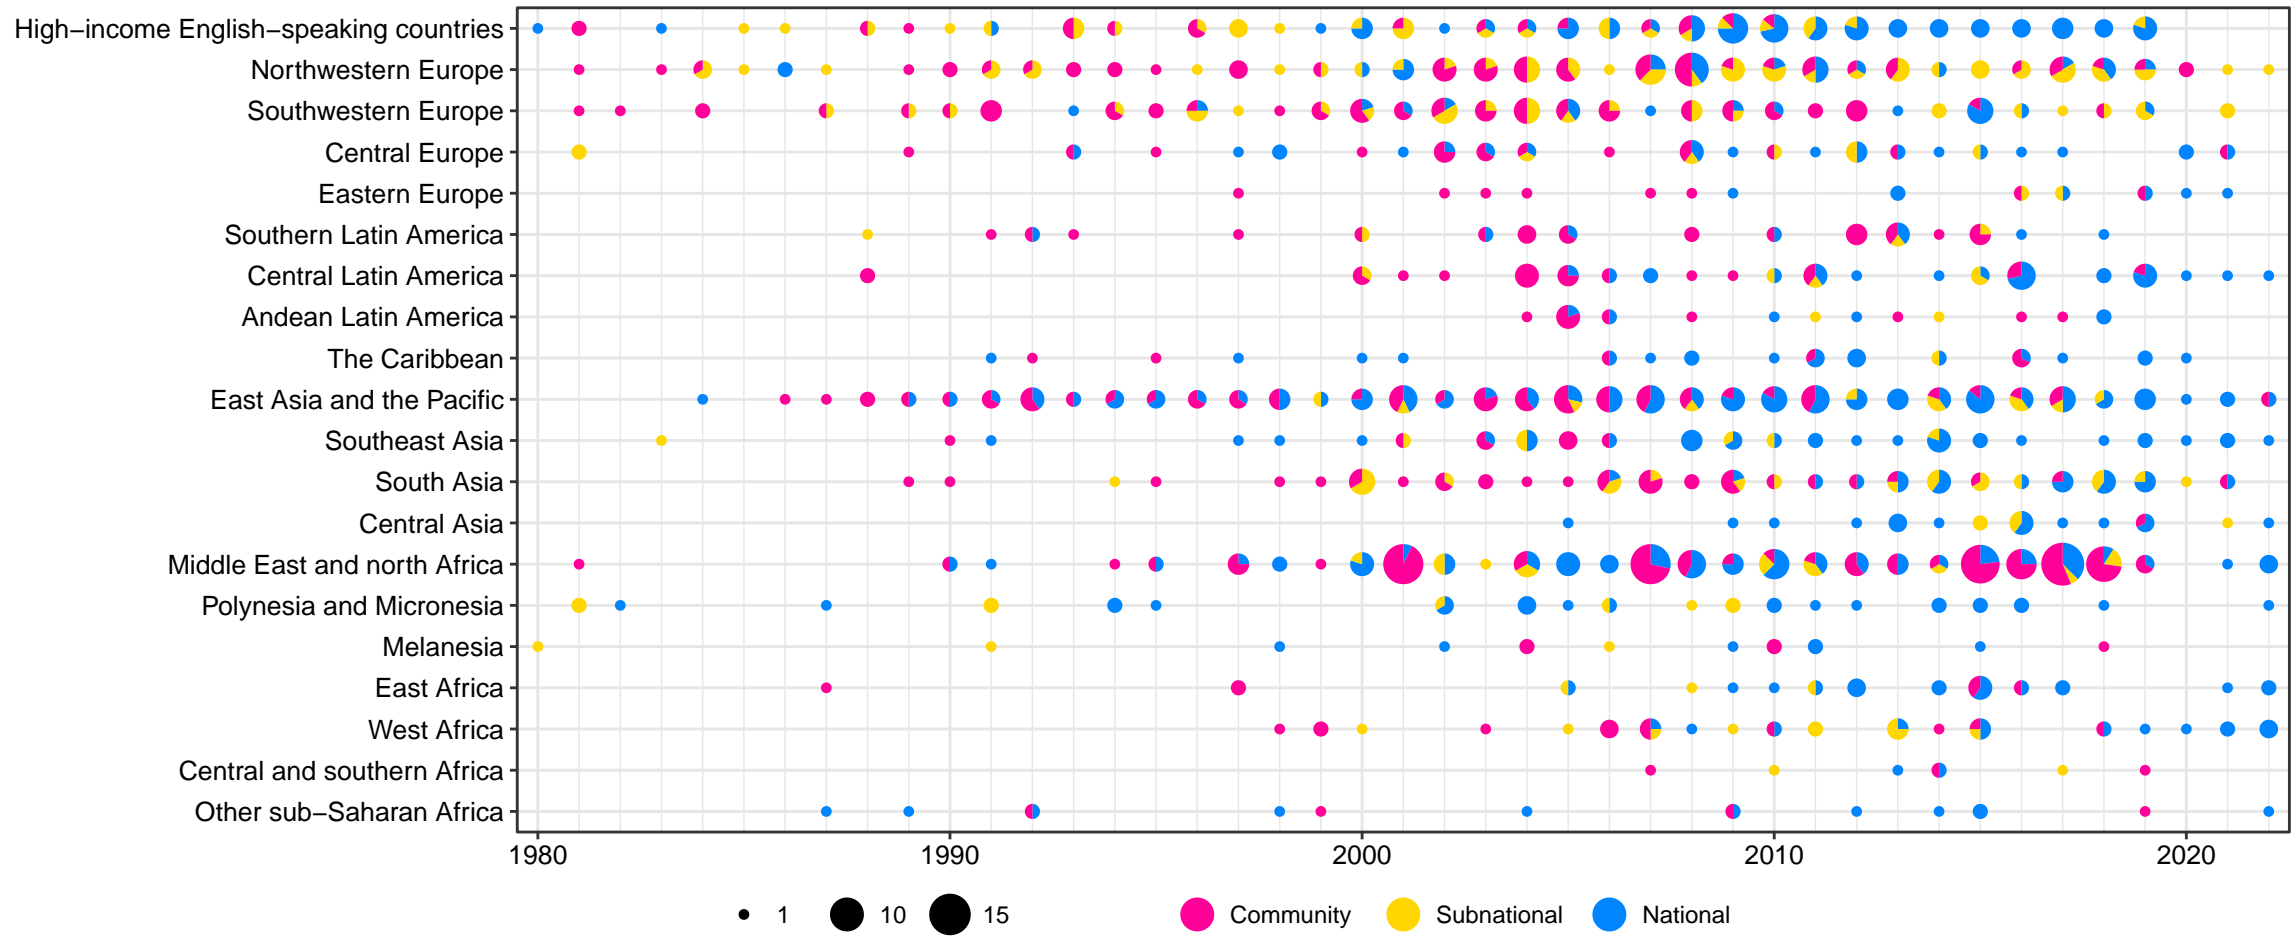

**Appendix Figure 3.** Posterior probability that age-standardised diabetes prevalence for people aged 18+ years increased from 1990 to 2022.

The maps show the PP of an increase from 1990 to 2022. The PP of a decrease is one minus that of an increase. The density plot alongside each map shows the smoothed distribution of estimates across countries.

## Women

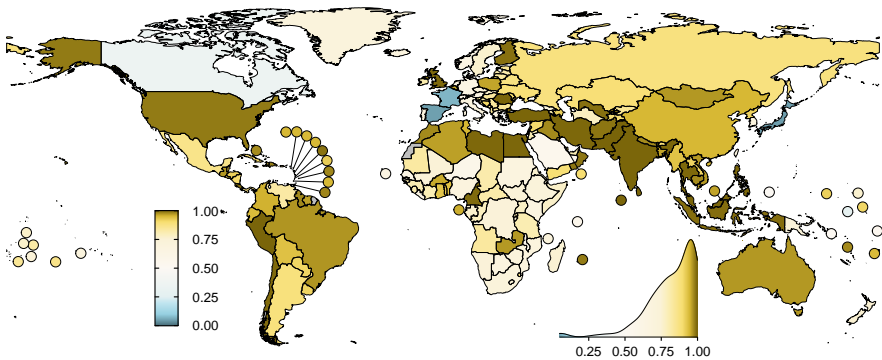

## Men

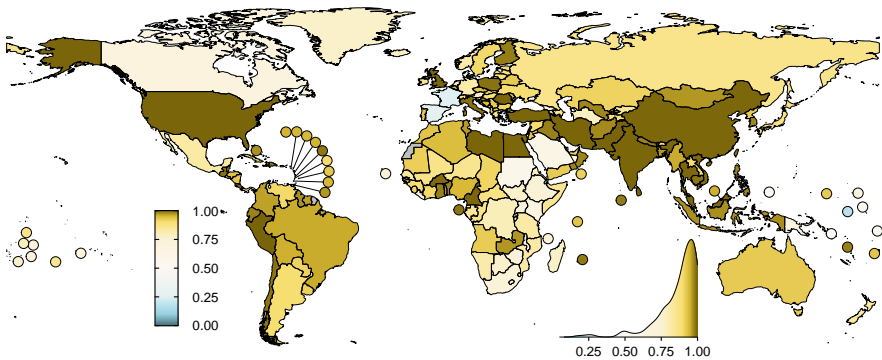

**Appendix Figure 4.** Posterior probability that age-standardised diabetes treatment coverage for people aged 30+ years increased from 1990 to 2022.

The maps show the PP of an increase from 1990 to 2022. The PP of a decrease is one minus that of an increase. The density plot alongside each map shows the smoothed distribution of estimates across countries.

## Women

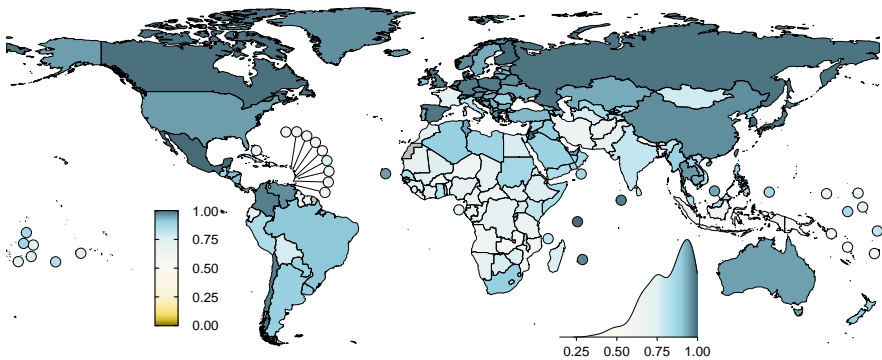

## Men

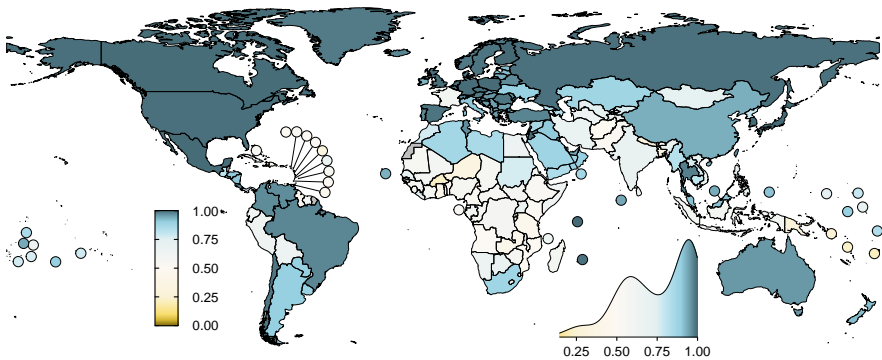

**Appendix Figure 5.** Relationship between levels in 1990 and 2022 for age-standardised diabetes prevalence for people aged 18+ years and age-standardised treatment coverage for people aged 30+ years.

Each point shows one country. Points that are filled have a posterior probability (PP) >0.80 of the observed change being a true decrease or increase. If neither an increase nor a decrease was detected at PP = 0.80 the point is hollow.



Women (18+ years)

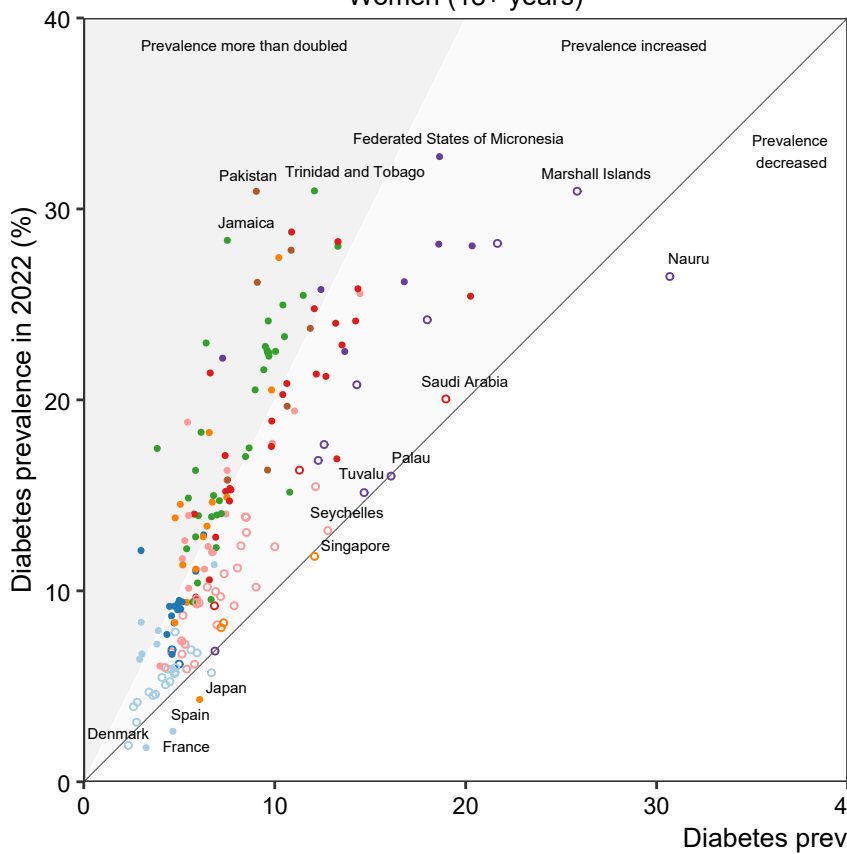

Men (18+ years)

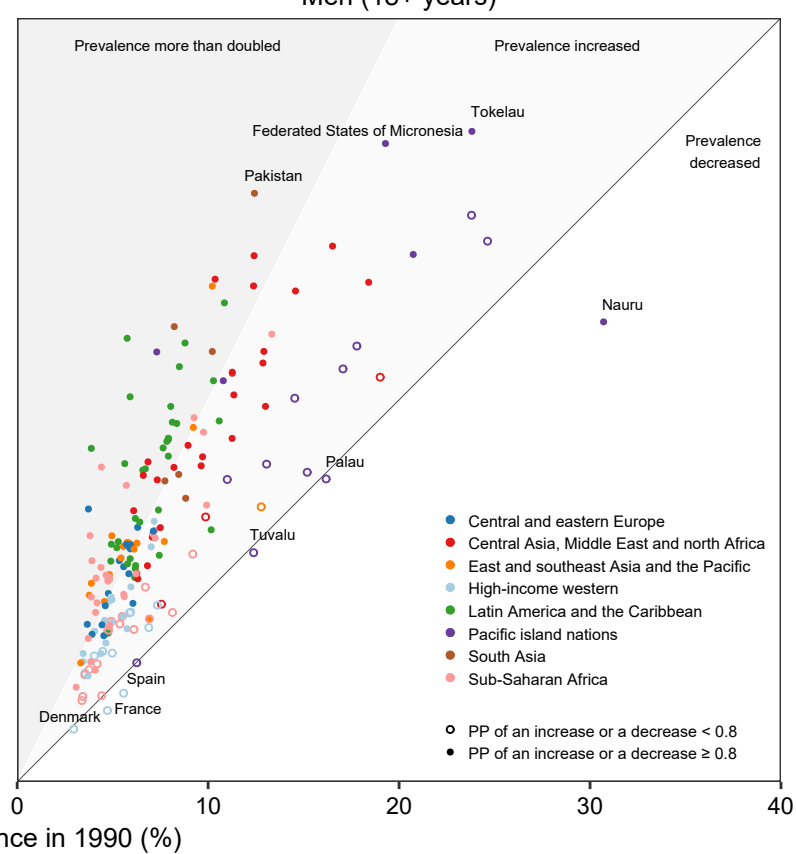

Women (30+ years)

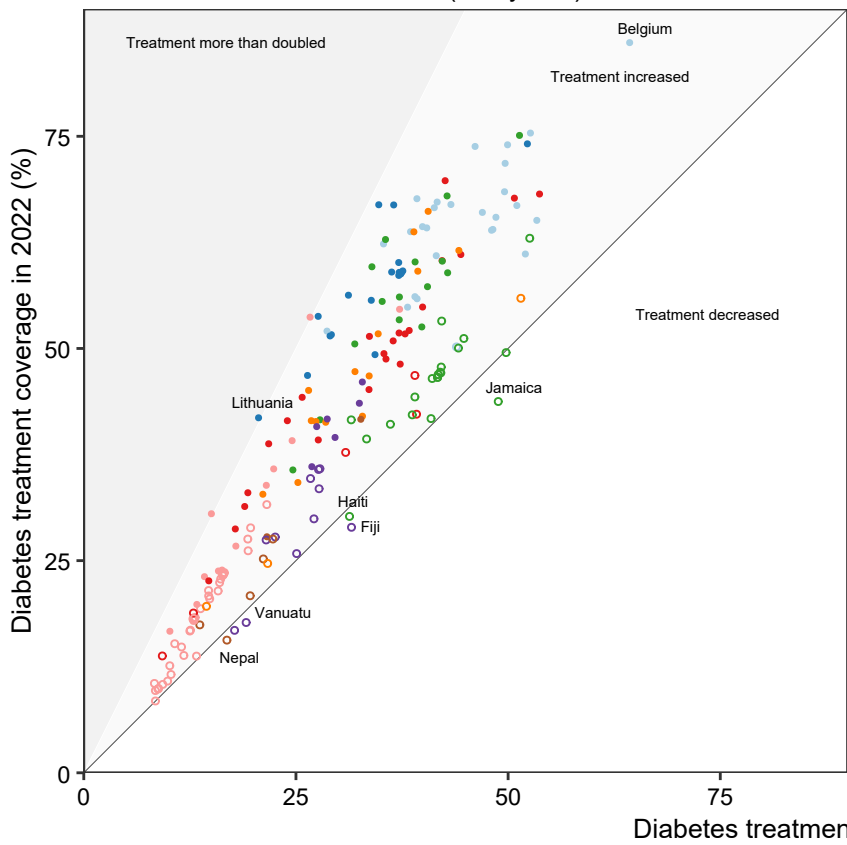

Men (30+ years)

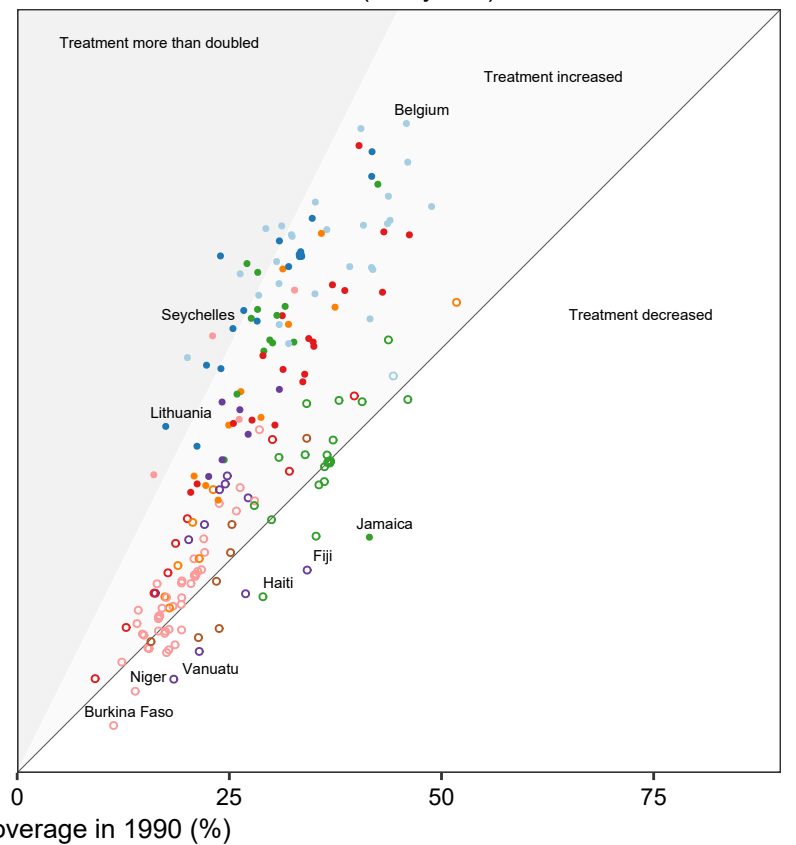

**Appendix Figure 6.** Relationship of age-standardised diabetes prevalence and treatment coverage between women and men in 2022. Each point shows one country.

Diabetes prevalence (18+ years)

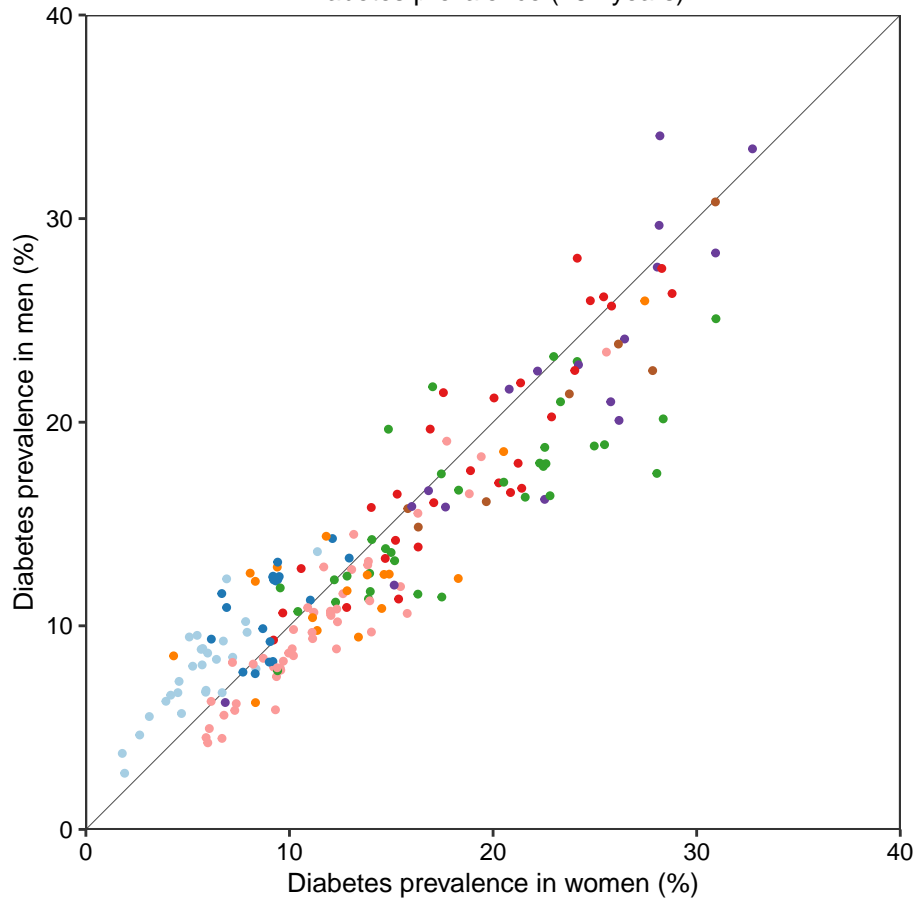

Diabetes treatment (30+ years)

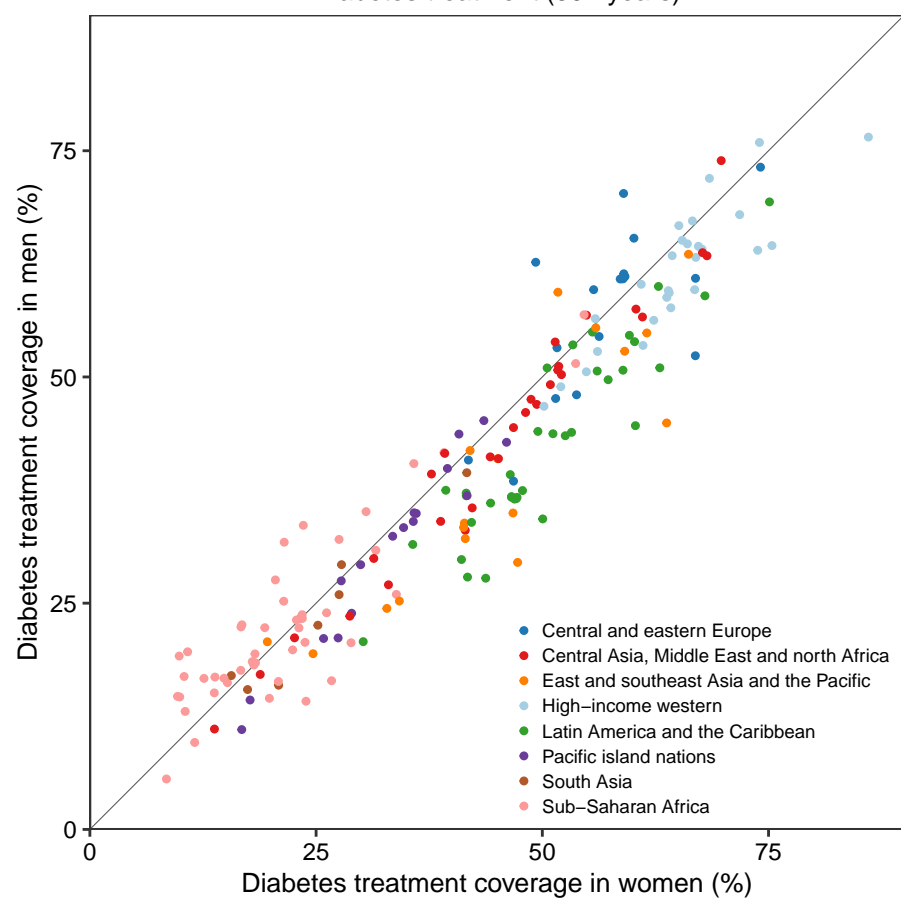

**Appendix Figure 7.** Relationship between age-standardised and crude prevalence of diabetes among women and men aged 18+ years in 2022. Each point shows one country.

Women (18+ years)

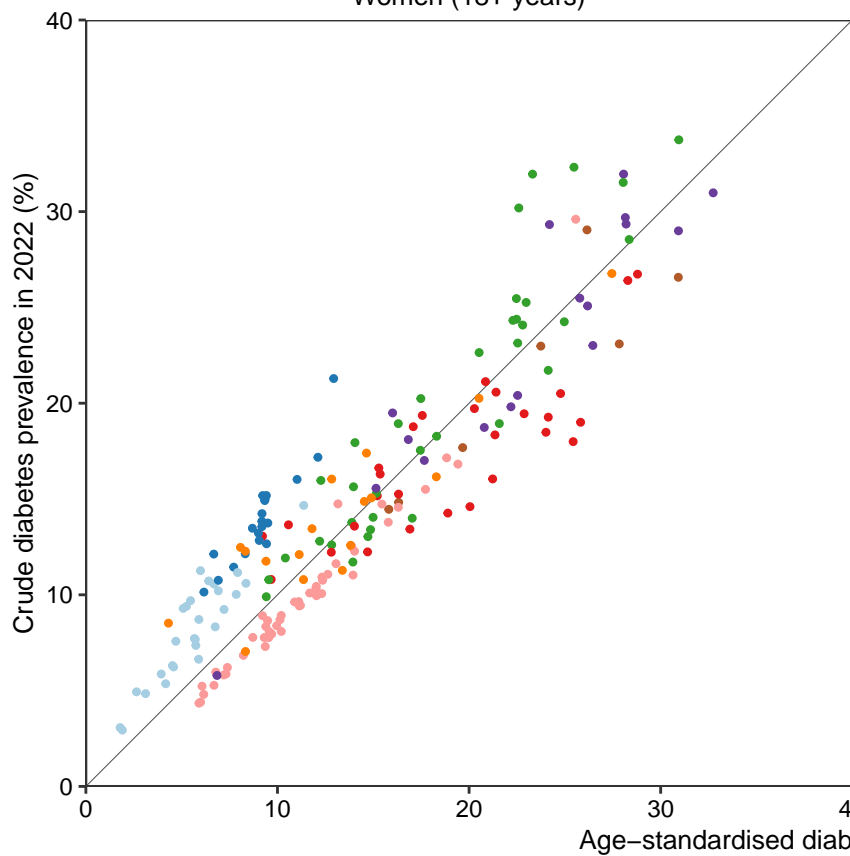

Men (18+ years)

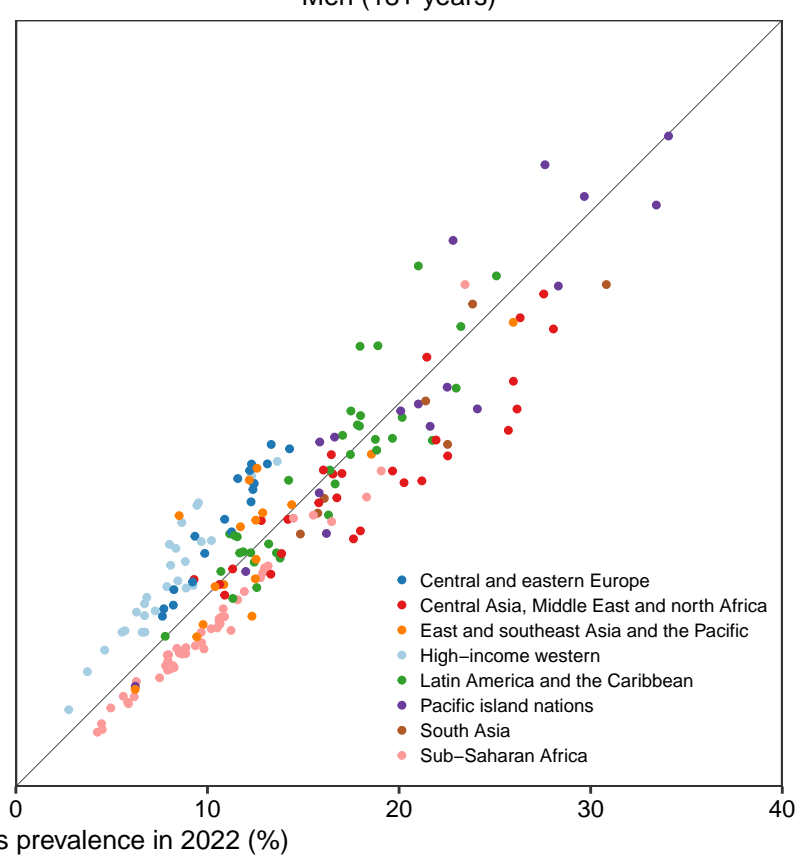

Women (30+ years)

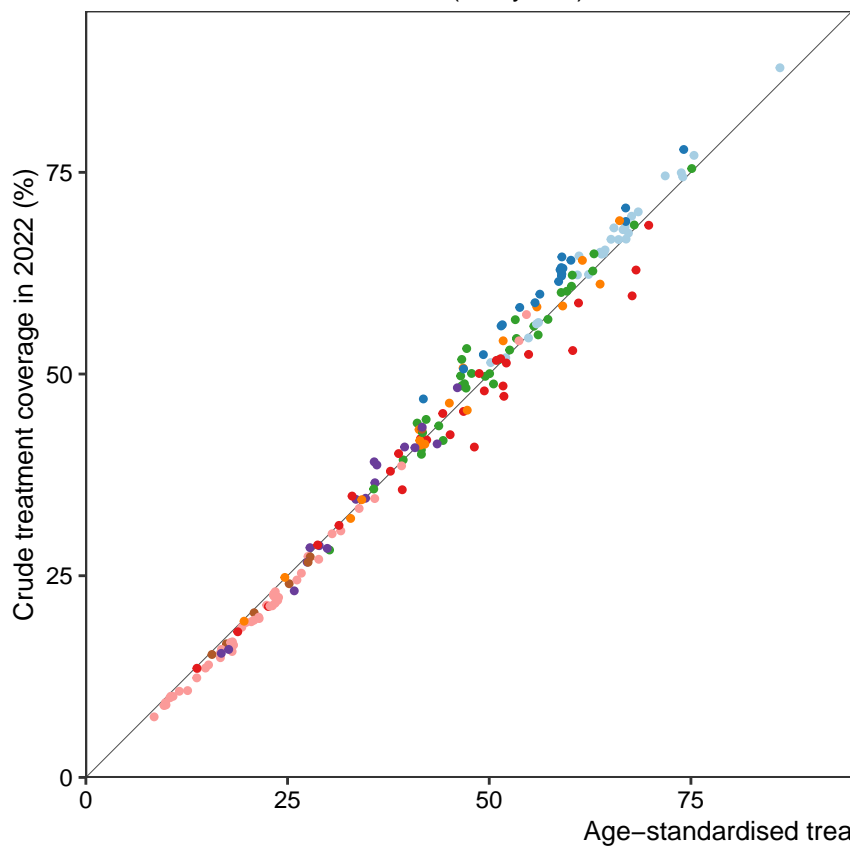

Men (30+ years)

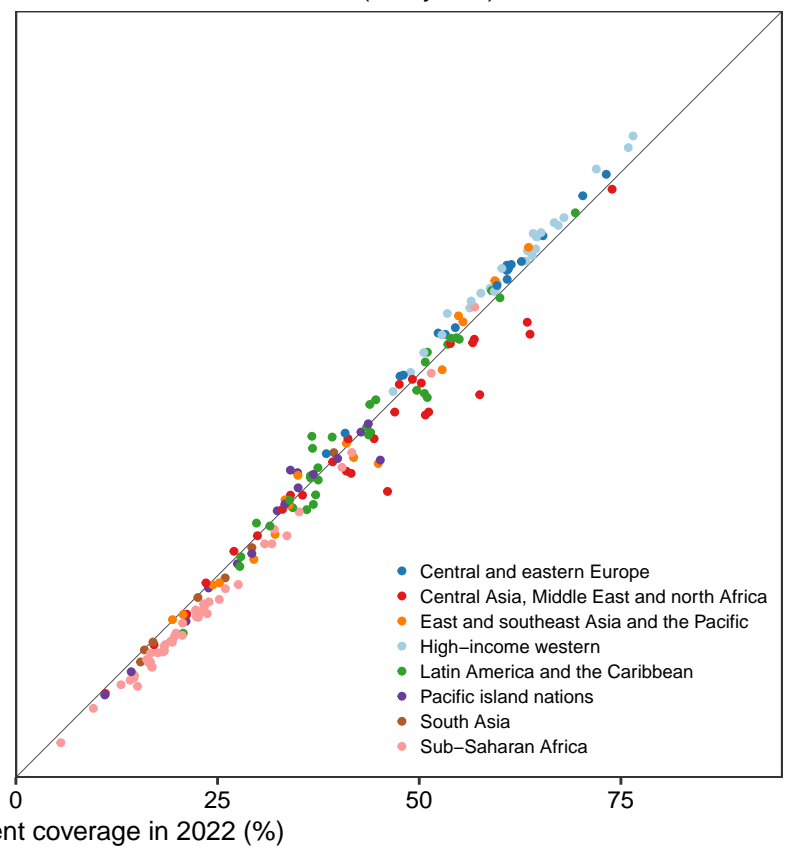

**Appendix Figure 8.** Median age of women and men with diabetes in 2022 by country.

## Women

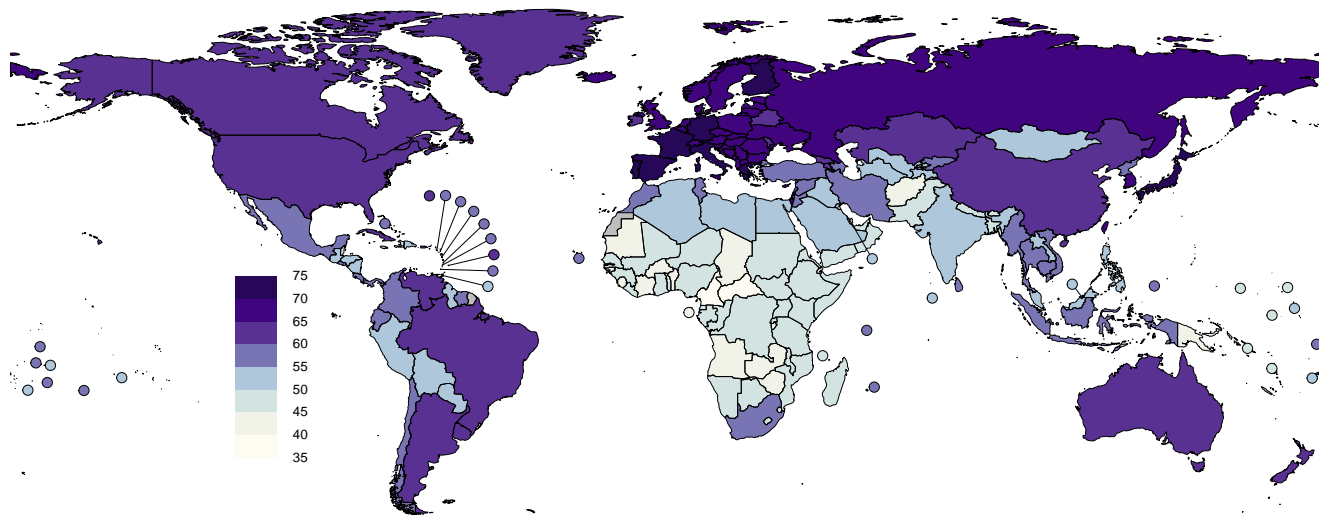

## Men

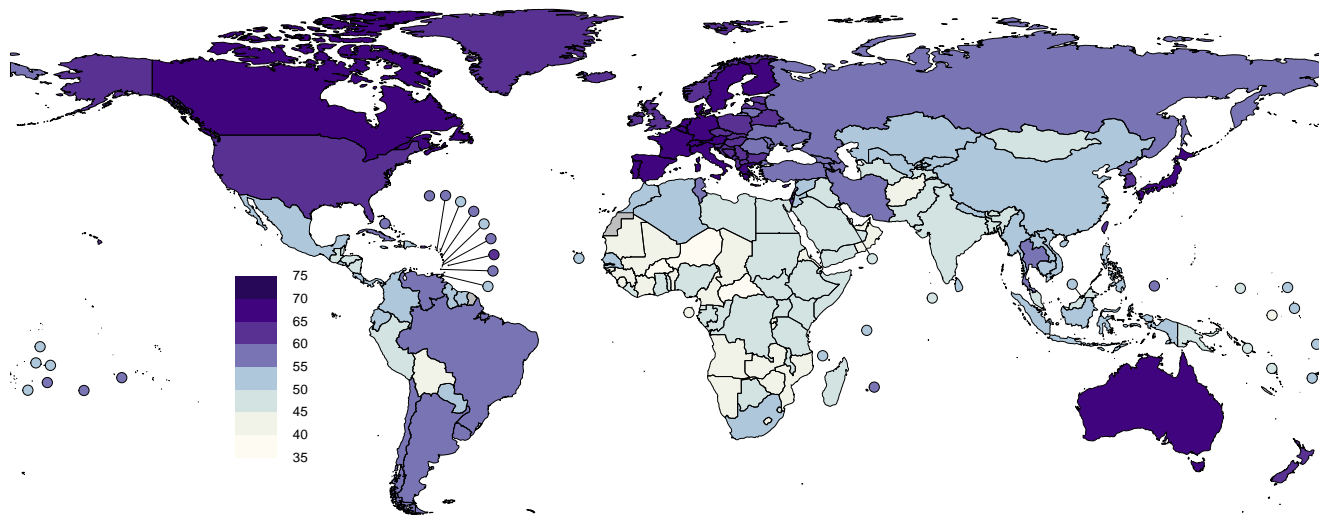

**Appendix Figure 9.** Age-standardised diabetes prevalence for people aged 18+ years from 1990 to 2022 by country, for both sexes combined.

See main paper Figure 1 caption for descriptions of the contents of the figure and for definitions.



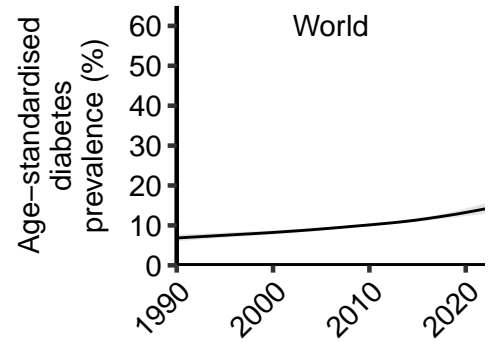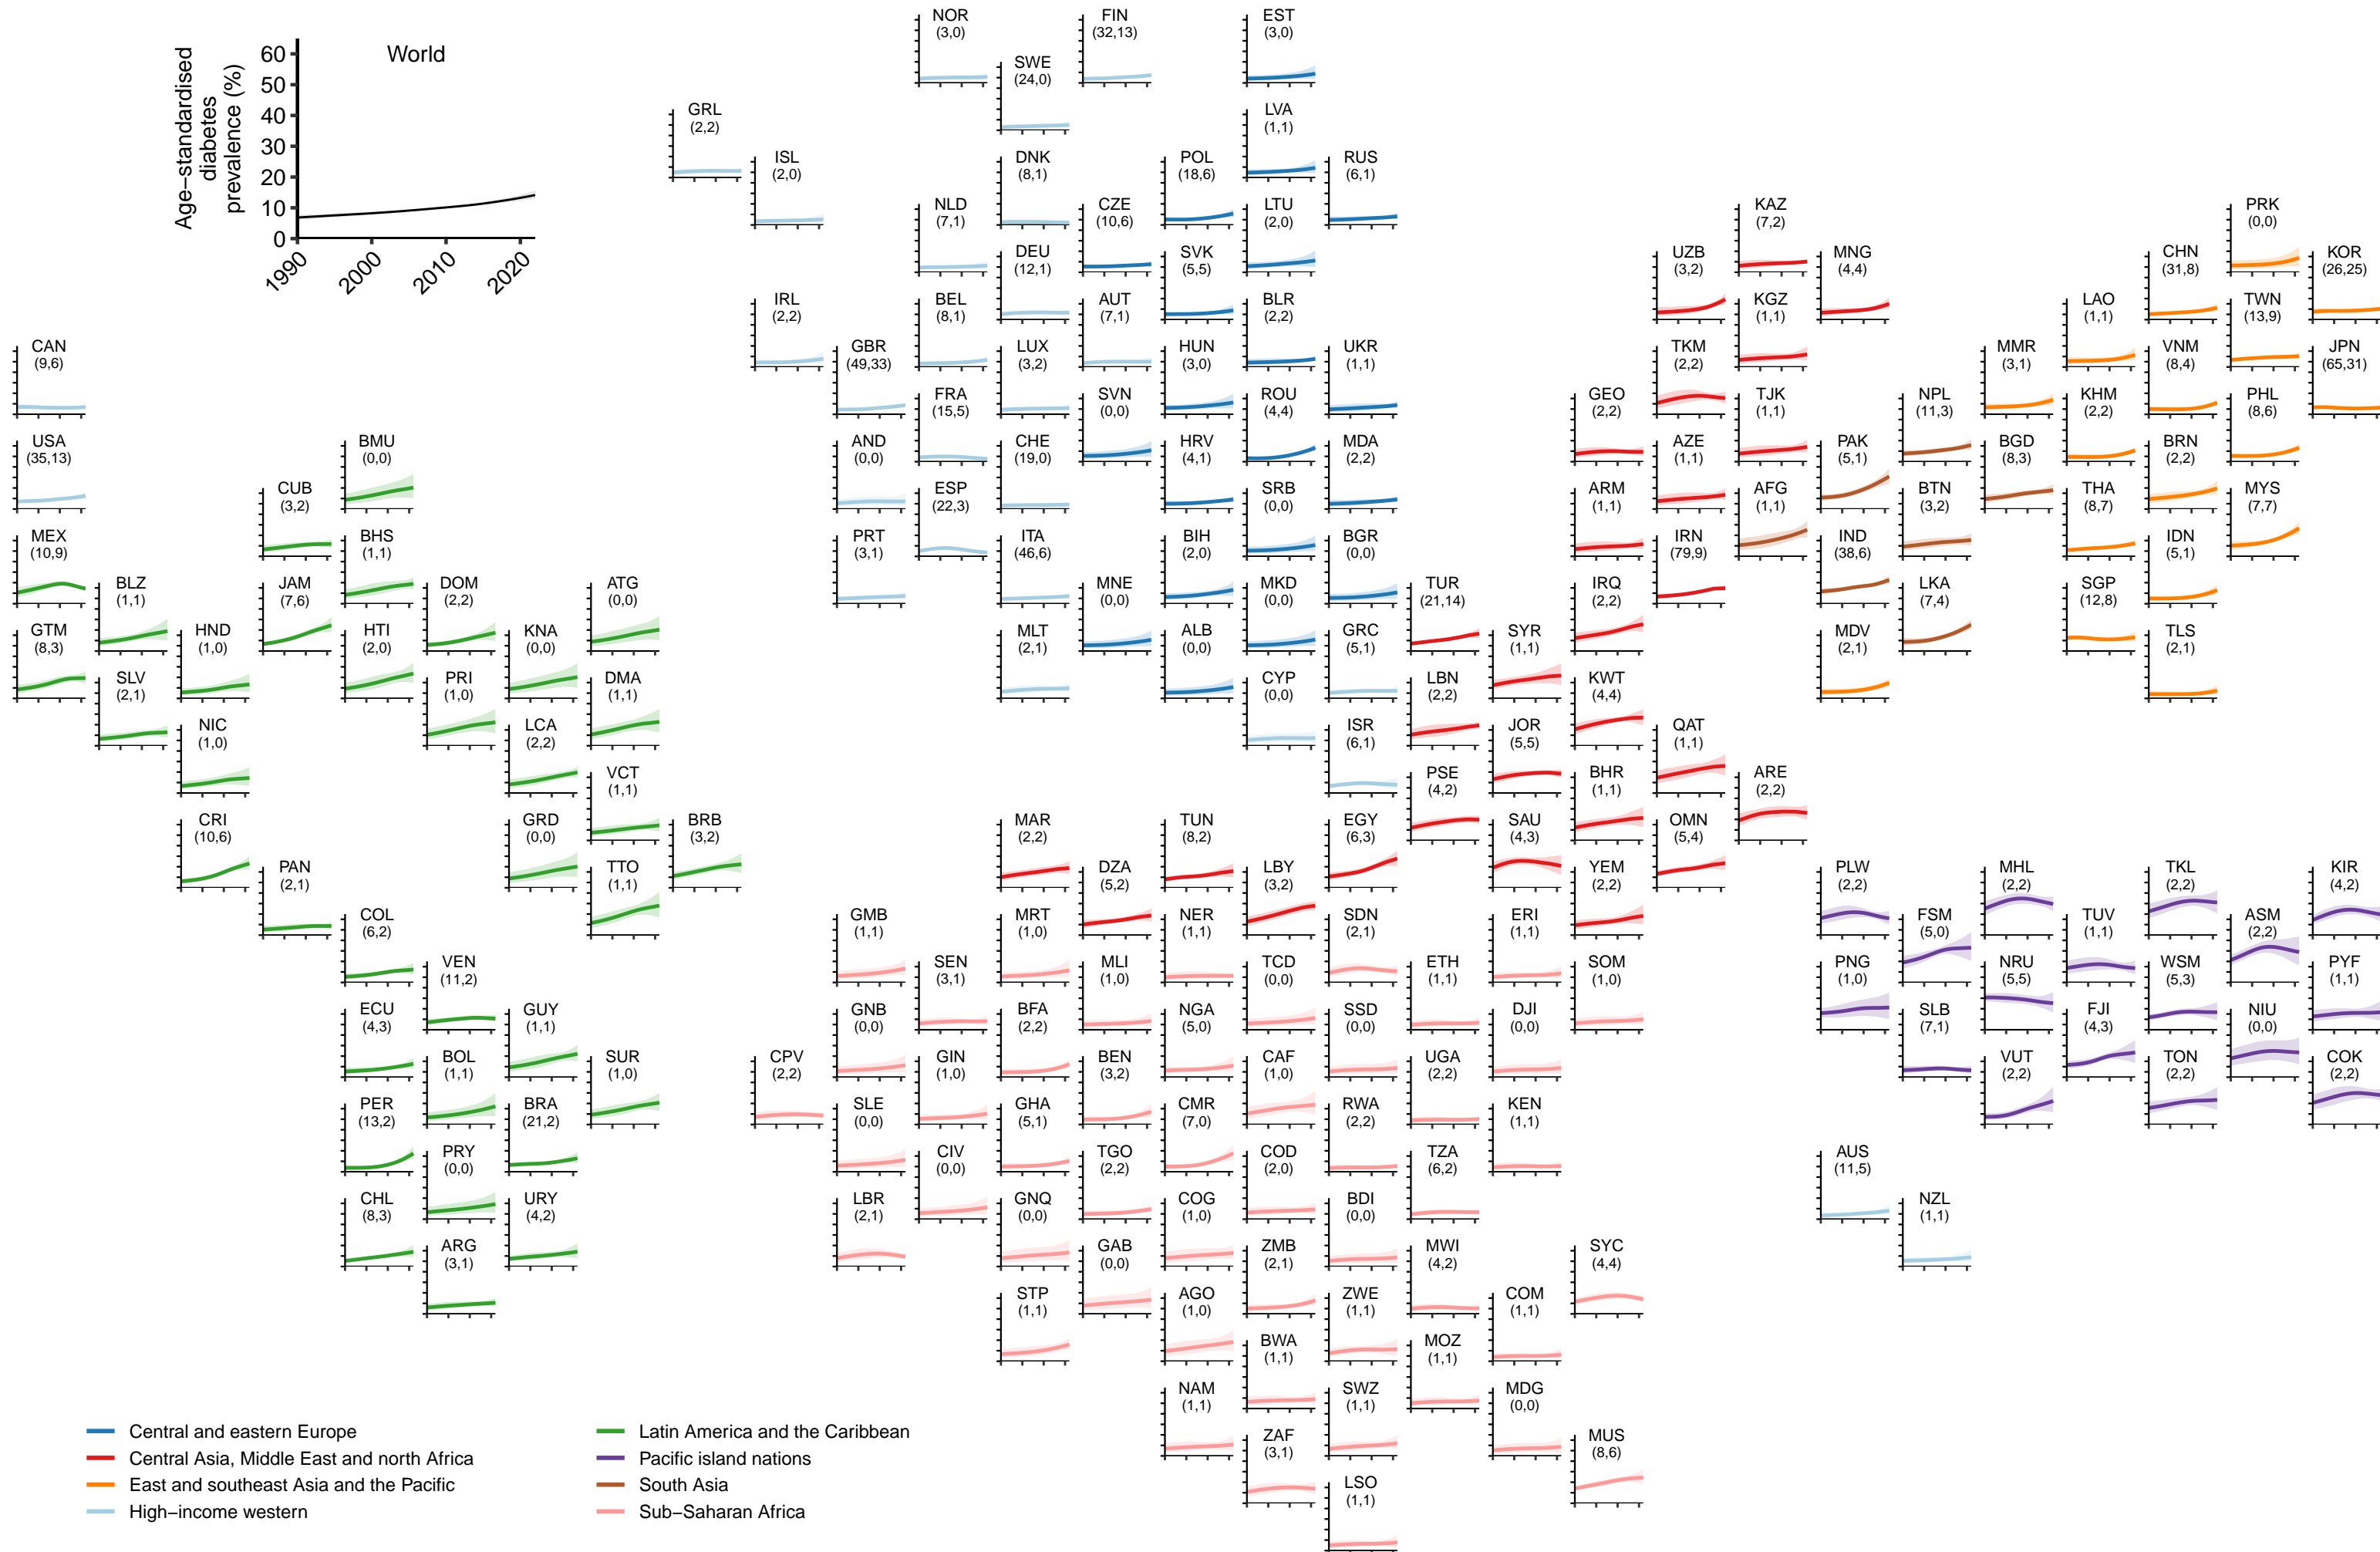

**Appendix Figure 10.** Levels in 2022 and change from 1990 to 2022 by country of (A) age-standardised diabetes prevalence for people aged 18+ years, and (B) age-standardised treatment coverage for people aged 30+ years, for both sexes combined.

The density plot alongside each map shows the smoothed distribution of estimates across countries.

## A Both sexes (18+ years)

Prevalence in 2022

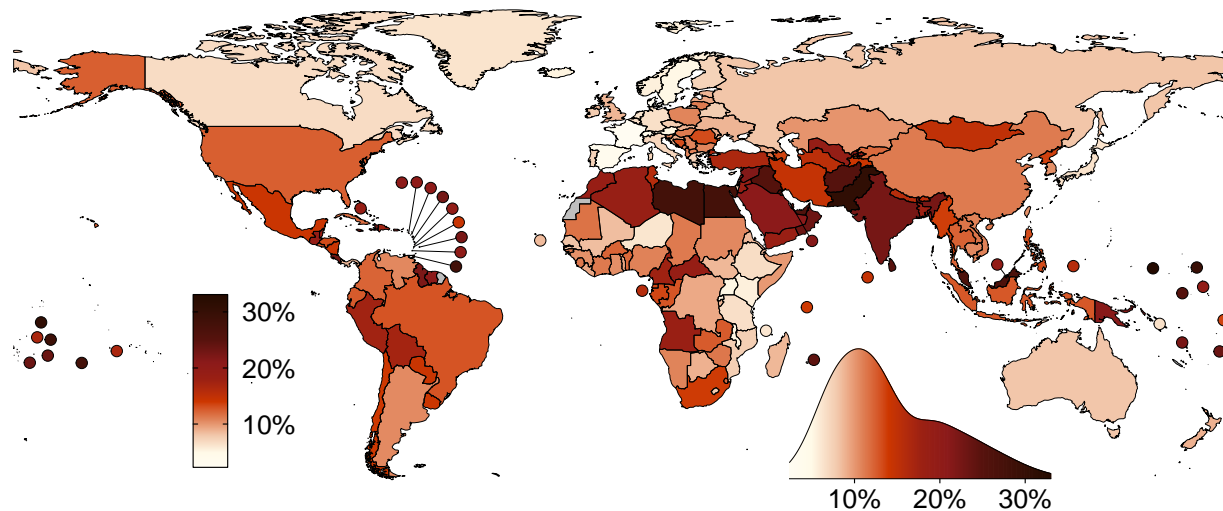

Change in prevalence from 1990 to 2022

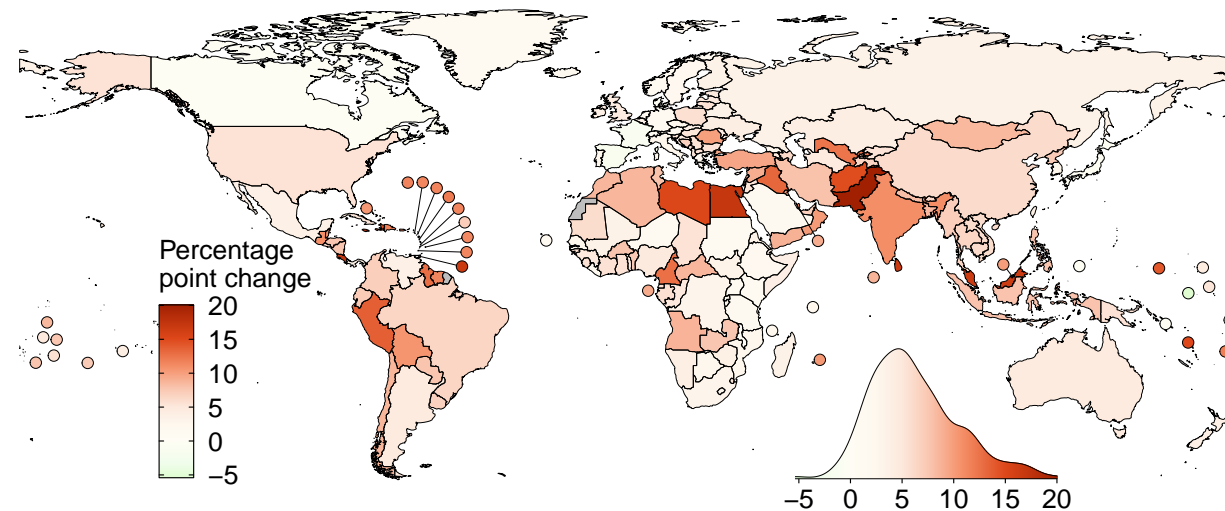

## B Both sexes (30+ years)

Treatment in 2022

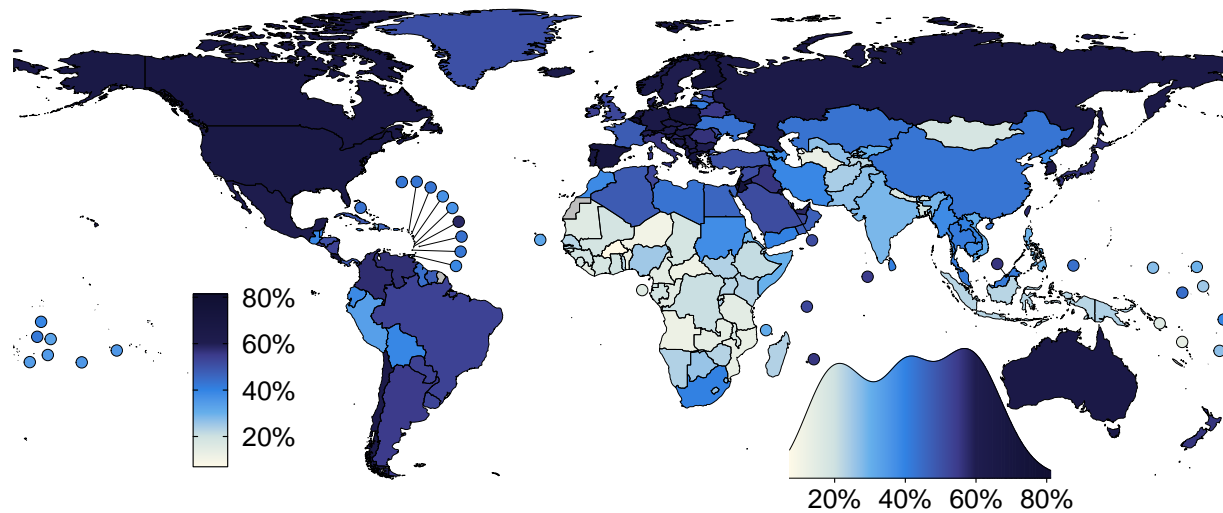

Change in treatment from 1990 to 2022

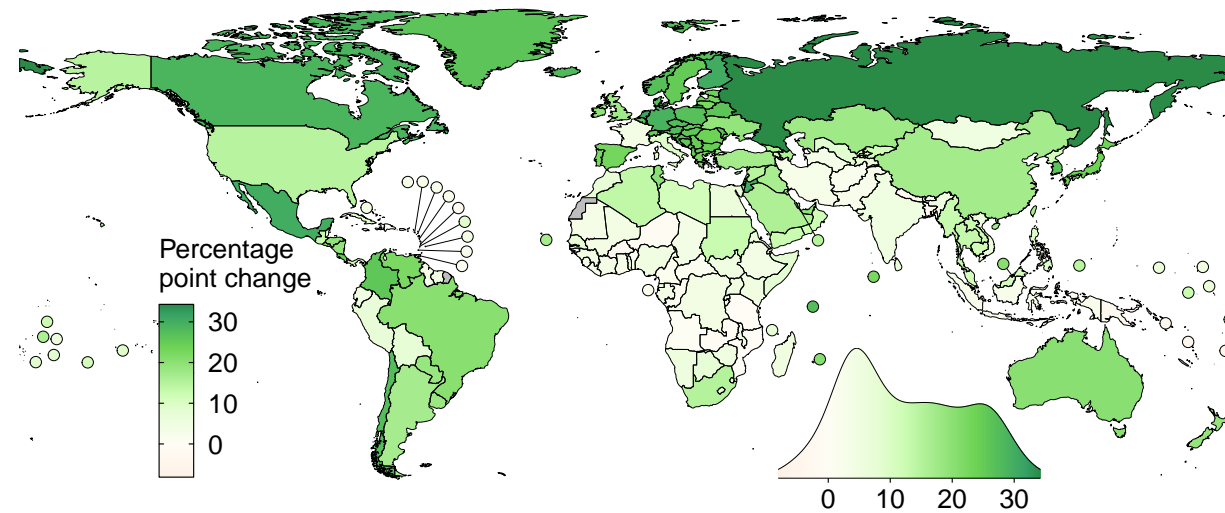

**Appendix Figure 11.** Age-standardised treatment coverage for people aged 30+ years in 1990 and 2022, for both sexes combined.

Each line represents a country, with countries coloured by the super-region in which they fall.

The black triangle shows the age-standardised treatment coverage for the world.

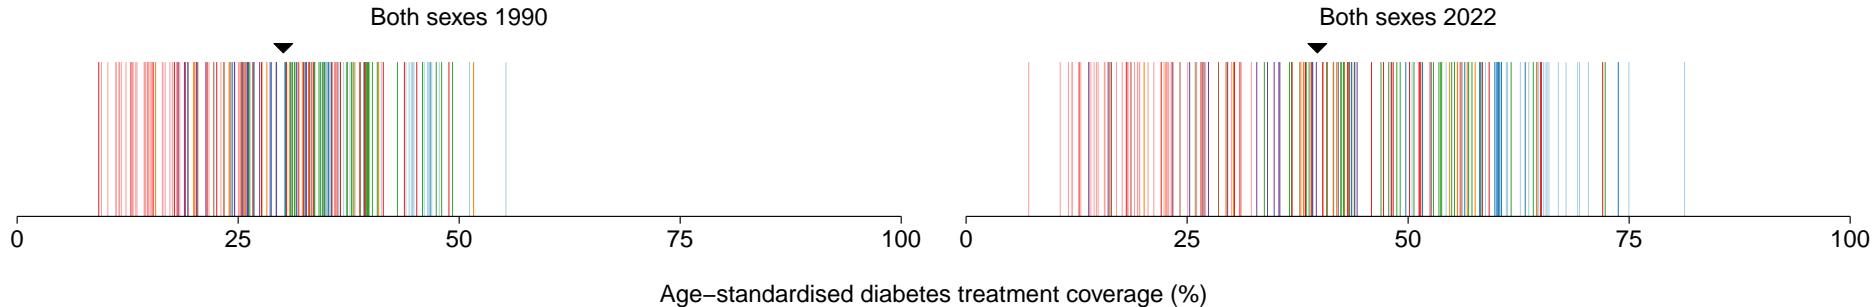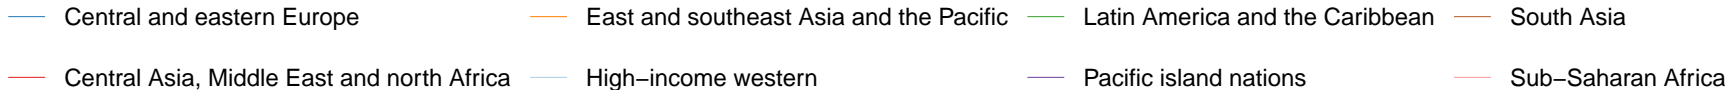

## References

1. NCD Risk Factor Collaboration (NCD-RisC). Worldwide trends in diabetes since 1980: a pooled analysis of 751 population-based studies with 4.4 million participants. *Lancet* 2016; **387**(10027): 1513-30.
2. NCD Risk Factor Collaboration (NCD-RisC). Worldwide trends in underweight and obesity from 1990 to 2022: a pooled analysis of 3663 population-representative studies with 222 million children, adolescents, and adults. *Lancet* 2024; **403**(10431): 1027-50.
3. Danaei G, Finucane MM, Lin JK, et al. National, regional, and global trends in systolic blood pressure since 1980: systematic analysis of health examination surveys and epidemiological studies with 786 country-years and 5.4 million participants. *Lancet* 2011; **377**(9765): 568-77.
4. Danaei G, Finucane MM, Lu Y, et al. National, regional, and global trends in fasting plasma glucose and diabetes prevalence since 1980: systematic analysis of health examination surveys and epidemiological studies with 370 country-years and 2.7 million participants. *Lancet* 2011; **378**(9785): 31-40.
5. Farzadfar F, Finucane MM, Danaei G, et al. National, regional, and global trends in serum total cholesterol since 1980: systematic analysis of health examination surveys and epidemiological studies with 321 country-years and 3.0 million participants. *Lancet* 2011; **377**(9765): 578-86.
6. Finucane MM, Stevens GA, Cowan MJ, et al. National, regional, and global trends in body-mass index since 1980: systematic analysis of health examination surveys and epidemiological studies with 960 country-years and 9.1 million participants. *Lancet* 2011; **377**(9765): 557-67.
7. Ogurtsova K, Guariguata L, Barengo NC, et al. IDF Diabetes Atlas: global estimates of undiagnosed diabetes in adults for 2021. *Diabetes Res Clin Pract* 2022; **183**: 109118.
8. NCD Risk Factor Collaboration (NCD-RisC). Global variation in diabetes diagnosis and prevalence based on fasting glucose and hemoglobin A1c. *Nat Med* 2023; **29**(11): 2885-901.
9. John WG, Mosca A, Weykamp C, Goodall I. HbA1c standardisation: history, science and politics. *Clin Biochem Rev* 2007; **28**(4): 163-8.
10. Carstensen B, Lindstrom J, Sundvall J, Borch-Johnsen K, Tuomilehto J, DPS Study Group. Measurement of blood glucose: comparison between different types of specimens. *Ann Clin Biochem* 2008; **45**(Pt 2): 140-8.
11. Cowie CC, Rust KF, Ford ES, et al. Full accounting of diabetes and pre-diabetes in the U.S. population in 1988-1994 and 2005-2006. *Diabetes Care* 2009; **32**(2): 287-94.
12. Anjana RM, Unnikrishnan R, Deepa M, et al. Metabolic non-communicable disease health report of India: the ICMR-INDIAB national cross-sectional study (ICMR-INDIAB-17). *Lancet Diabetes Endocrinol* 2023; **11**(7): 474-89.
13. Diabetes Control Complications Trial Research Group, Nathan DM, Genuth S, et al. The effect of intensive treatment of diabetes on the development and progression of long-term complications in insulin-dependent diabetes mellitus. *N Engl J Med* 1993; **329**(14): 977-86.
14. UK Prospective Diabetes Study (UKPDS) Group. Intensive blood-glucose control with sulphonylureas or insulin compared with conventional treatment and risk of complications in patients with type 2 diabetes (UKPDS 33). *Lancet* 1998; **352**(9131): 837-53.
15. Finucane MM, Paciorek CJ, Danaei G, Ezzati M. Bayesian estimation of population-level trends in measures of health status. *Stat Sci* 2014; **29**(1): 18-25.
16. NCD Risk Factor Collaboration (NCD-RisC). Worldwide trends in hypertension prevalence and progress in treatment and control from 1990 to 2019: a pooled analysis of 1201 population-representative studies with 104 million participants. *Lancet* 2021; **398**(10304): 957-80.
17. Finucane MM, Paciorek CJ, Stevens GA, Ezzati M. Semiparametric Bayesian density estimation with disparate data sources: a meta-analysis of global childhood undernutrition. *J Am Stat Assoc* 2015; **110**(511): 889-901.
18. Gelman A. Prior distributions for variance parameters in hierarchical models (comment on article by Browne and Draper). *Bayesian Anal* 2006; **1**(3): 515-34.

19. Breslow NE, Clayton DG. Approximate inference in generalized linear mixed models. *J Am Stat Assoc* 1993; **88**(421): 9-25.
20. Wood SN. Generalized Additive Models: An Introduction with R. Boca Raton, FL: Chapman & Hall/CRC; 2006.
21. Rue H, Held L. Gaussian Markov Random Fields: Theory and Applications. New York: CRC Press; 2005.
22. Harville DA. Matrix Algebra from a Statistician's Perspective: Springer-Verlag; 2008.
23. Danaei G, Finucane MM, Lin JK, et al. National, regional, and global trends in systolic blood pressure since 1980: systematic analysis of health examination surveys and epidemiological studies with 786 country-years and 5.4 million participants. *Lancet* 2011; **377**(9765): 568-77.
24. Singh GM, Danaei G, Pelizzari PM, et al. The age associations of blood pressure, cholesterol, and glucose: analysis of health examination surveys from international populations. *Circulation* 2012; **125**(18): 2204-11.
25. United Nations Department of Economic and Social Affairs, Population Division. World Urbanization Prospects: The 2018 Revision. New York: United Nations, 2019.
26. Smith AF, Roberts GO. Bayesian computation via the Gibbs sampler and related Markov chain Monte Carlo methods. *J R Stat Soc Series B Stat Methodol* 1993; **55**(1): 3-23.
27. Vehtari A, Gelman A, Simpson D, Carpenter B, Bürkner P-C. Rank-normalization, folding, and localization: an improved R for assessing convergence of MCMC (with discussion). *Bayesian Anal* 2021; **16**(2): 667-718.
28. Gelman A, Hwang J, Vehtari A. Understanding predictive information criteria for Bayesian models. *Stat Comput* 2014; **24**(6): 997-1016.
29. Stan Development Team. RStan: the R interface to Stan. 2022. <https://mc-stan.org/>.
30. Ahmad OB, Boschi-Pinto C, Lopez AD, Murray CJ, Lozano R, Inoue M. Age standardization of rates: a new WHO standard. GPE Discussion Paper Series 31. Geneva: World Health Organization, 2001.
31. United Nations, Department of Economic and Social Affairs, Population Division. World Population Prospects 2024, Online Edition., 2024.
32. NCD Risk Factor Collaboration (NCD-RisC). Repositioning of the global epicentre of non-optimal cholesterol. *Nature* 2020; **582**(7810): 73-7.
33. NCD Risk Factor Collaboration (NCD-RisC). Trends in adult body-mass index in 200 countries from 1975 to 2014: a pooled analysis of 1698 population-based measurement studies with 19.2 million participants. *Lancet* 2016; **387**(10026): 1377-96.
34. NCD Risk Factor Collaboration (NCD-RisC). Rising rural body-mass index is the main driver of the global obesity epidemic in adults. *Nature* 2019; **569**(7755): 260-4.
35. NCD Risk Factor Collaboration (NCD-RisC). Height and body-mass index trajectories of school-aged children and adolescents from 1985 to 2019 in 200 countries and territories: a pooled analysis of 2181 population-based studies with 65 million participants. *Lancet* 2020; **396**(10261): 1511-24.
36. NCD Risk Factor Collaboration (NCD-RisC). Diminishing benefits of urban living for children and adolescents' growth and development. *Nature* 2023; **615**(7954): 874-83.
37. NCD Risk Factor Collaboration (NCD-RisC). Worldwide trends in blood pressure from 1975 to 2015: a pooled analysis of 1479 population-based measurement studies with 19.1 million participants. *Lancet* 2017; **389**(10064): 37-55.
38. NCD Risk Factor Collaboration (NCD-RisC). Worldwide trends in body-mass index, underweight, overweight, and obesity from 1975 to 2016: a pooled analysis of 2416 population-based measurement studies in 128.9 million children, adolescents, and adults. *Lancet* 2017; **390**(10113): 2627-42.
39. GBD Diabetes Collaborators. Global, regional, and national burden of diabetes from 1990 to 2021, with projections of prevalence to 2050: a systematic analysis for the Global Burden of Disease Study 2021. *Lancet* 2023; **402**(10397): 203-34.
40. Sun H, Saeedi P, Karuranga S, et al. IDF Diabetes Atlas: global, regional and country-level diabetes prevalence estimates for 2021 and projections for 2045. *Diabetes Res Clin Pract* 2022; **183**: 109119.

41. Shabbir S, Nadeem M, Sattar A, et al. Type and frequency of hemoglobinopathies, diagnosed in the area of Karachi, in Pakistan. *Cogent Med* 2016; **3**: 1188875.
